# Supplementary material for: Transcriptome analysis reveals the mechanisms for mycorrhiza-enhanced salt tolerance in rice
Source: Front Plant Sci. 2022 Dec 19;13:1072171. doi: 10.3389/fpls.2022.1072171 (PMC9806932; doi:10.3389/fpls.2022.1072171)
Supplement: Supplementary file 2 [file DataSheet_2.xlsx]

## Sheet: S1
Table S1 Summary statistics of RNA-seq data.
Sequencing results
Sample	Raw reads	Raw bases	Cleaned reads	Cleaned bases	Q20(%)	Q30(%)	GC content (%)
M-0-r-1	58487730	8831647230	57531792	8433427235	98.22	95.15	49.96
M-0-r-2	62805146	9483577046	60539616	8857530629	97.33	93.93	50.84
M-0-r-3	56929782	8596397082	55837078	8151299633	98	94.74	49.76
R-0-r-1	55669826	8406143726	54628686	7993612949	97.99	94.63	46.15
R-0-r-3	68368932	10323708732	67662786	9940592559	98.14	94.5	45.46
M-0-s-1	56898978	8591745678	55668484	8124096273	97.9	94.64	49.26
M-0-s-2	68807624	10389951224	67809852	9946692417	98.22	95.02	49.56
M-0-s-3	76837850	11602515350	75923448	11127093432	98.28	95.09	49.42
R-0-s-1	66033666	9971083566	65102524	9555369577	98.16	94.89	49.49
R-0-s-2	53388028	8061592228	52721372	7726242528	98.35	95.28	49.67
R-0-s-3	59006300	8909951300	58177028	8570196655	98.21	94.93	48.94
Total	683233862	103168313162	671602666	98426153887
M-150-r-1	54026946	8158068846	52373242	7304591255	96.975	92.49	52.34
M-150-r-2	59712076	9016523476	57846054	8102587649	97.14	92.98	53.16
R-150-r-1	74039740	11180000740	71744888	10107829085	97.105	92.855	52.25
R-150-r-2	60930144	9200451744	59029786	8365873360	97.08	92.825	50.92
R-150-r-3	62946592	9504935392	60945290	8542107119	97.025	92.66	52.51
M-150-s-1	48951710	7391708210	47156398	6570042539	96.55	91.55	49.48
M-150-s-2	63108070	9529318570	61126362	8535001146	97.06	92.86	50.26
M-150-s-3	56494862	8530724162	54914818	7686321457	97.235	93.205	50.47
R-150-s-1	61209584	9242647184	59381176	8309864727	97.15	93.06	49.48
R-150-s-2	55238092	8340951892	53617742	7532575741	97.185	93.125	50.26
R-150-s-3	59420168	8972445368	57257360	7963988941	96.565	91.55	50.47
Total	656077984	99067775584	635393116	89365023376
Transcriptome assembly statistics
Group	Total assembled bases	Assembled Trinity genes	Assembled Trinity transcripts	GC content (%)	N50 length (bp)	Average read length (bp)	Read length median (bp)
0mM NaCl (M-0-r+M-0-s+R-0-r+R-0-s)	457272714	182874	312792	44	2514	1462	835
150mM NaCl (M-150-r+M-150-s+R-150-r+R-150-s)	650100599	436809	664715	45	2493	978	337

## Sheet: S2
Table S2 Significant GO terms (FDR<0.05) of DEGs in regions 1, 4, 5, and 7. BP, biological processes; MF, molecular functions; CC, cellular components.
Region 1
Type	Term	Description	Count	%	PValue	Genes	ListTotal	PopHits	PopTotal	FoldChange	Bonferroni	Benjamini	FDR
GOTERM_CC	GO:0009507	chloroplast	678	9.31447	7.87e-32	LOC_Os01g03020,LOC_Os01g03144,LOC_Os01g03950,LOC_Os01g04130,LOC_Os01g04630,LOC_Os01g04900,LOC_Os01g05610,LOC_Os01g05800,LOC_Os01g05900,LOC_Os01g06020,LOC_Os01g07530,LOC_Os01g07730,LOC_Os01g09320,LOC_Os01g11860,LOC_Os01g11946,LOC_Os01g12220,LOC_Os01g12710,LOC_Os01g13770,LOC_Os01g14810,LOC_Os01g15010,LOC_Os01g16530,LOC_Os01g19740,LOC_Os01g20110,LOC_Os01g21820,LOC_Os01g24090,LOC_Os01g25600,LOC_Os01g…	7279	1750	32072	1.70705	1.06e-28	8.21e-28	1.06e-28
GOTERM_BP	GO:0008152	metabolic process	2246	30.8559	1.03e-28	LOC_Os01g01030,LOC_Os01g01120,LOC_Os01g01520,LOC_Os01g01650,LOC_Os01g01740,LOC_Os01g01790,LOC_Os01g01920,LOC_Os01g02360,LOC_Os01g02390,LOC_Os01g02400,LOC_Os01g02430,LOC_Os01g02590,LOC_Os01g02600,LOC_Os01g02610,LOC_Os01g02700,LOC_Os01g02760,LOC_Os01g02830,LOC_Os01g02840,LOC_Os01g02920,LOC_Os01g02930,LOC_Os01g03020,LOC_Os01g03620,LOC_Os01g03630,LOC_Os01g03710,LOC_Os01g03750,LOC_Os01g03950,LOC_Os01g…	(continue on the next row)
					(continue the previous row)	LOC_Os12g13950,LOC_Os12g14699,LOC_Os12g15314,LOC_Os12g17160,LOC_Os12g17600,LOC_Os12g18560,LOC_Os12g19030,LOC_Os12g19381,LOC_Os12g19470,LOC_Os12g19530,LOC_Os12g20150,LOC_Os12g23150,LOC_Os12g23190,LOC_Os12g23700,LOC_Os12g26060,LOC_Os12g27220,LOC_Os12g27350,LOC_Os12g28550,LOC_Os12g29580,LOC_Os12g29990,LOC_Os12g31370,LOC_Os12g31560,LOC_Os12g31810,LOC_Os12g32190,LOC_Os12g32750,LOC_Os12g32850,LOC_Os12g…	7279	7849	32072	1.26081	1.38e-25	5.36e-25	6.89e-26
GOTERM_CC	GO:0009579	thylakoid	276	3.79173	5.54e-21	LOC_Os01g01790,LOC_Os01g03750,LOC_Os01g04900,LOC_Os01g05070,LOC_Os01g05800,LOC_Os01g12710,LOC_Os01g17150,LOC_Os01g20110,LOC_Os01g31680,LOC_Os01g31690,LOC_Os01g32350,LOC_Os01g32730,LOC_Os01g37130,LOC_Os01g40710,LOC_Os01g43070,LOC_Os01g43150,LOC_Os01g45274,LOC_Os01g47330,LOC_Os01g47450,LOC_Os01g50860,LOC_Os01g54540,LOC_Os01g55570,LOC_Os01g56680,LOC_Os01g58020,LOC_Os01g58024,LOC_Os01g58470,LOC_Os01g…	7279	597	32072	2.03699	7.43e-18	1.93e-17	2.48e-18
GOTERM_CC	GO:0009570	chloroplast stroma	233	3.20099	9.69e-20	LOC_Os01g04130,LOC_Os01g14810,LOC_Os01g16530,LOC_Os01g21820,LOC_Os01g24090,LOC_Os01g27750,LOC_Os01g31110,LOC_Os01g31690,LOC_Os01g32350,LOC_Os01g33090,LOC_Os01g34080,LOC_Os01g37130,LOC_Os01g37510,LOC_Os01g38970,LOC_Os01g39270,LOC_Os01g43390,LOC_Os01g44210,LOC_Os01g45070,LOC_Os01g47330,LOC_Os01g48500,LOC_Os01g48690,LOC_Os01g48960,LOC_Os01g51754,LOC_Os01g54540,LOC_Os01g58790,LOC_Os01g59090,LOC_Os01g…	7279	481	32072	2.13435	1.3e-16	2.52e-16	3.25e-17
GOTERM_CC	GO:0016020	membrane	1687	23.1763	1.96e-16	LOC_Os01g01360,LOC_Os01g01790,LOC_Os01g02890,LOC_Os01g03144,LOC_Os01g03620,LOC_Os01g03630,LOC_Os01g03750,LOC_Os01g03914,LOC_Os01g04190,LOC_Os01g04660,LOC_Os01g04900,LOC_Os01g05070,LOC_Os01g05150,LOC_Os01g05170,LOC_Os01g05180,LOC_Os01g05710,LOC_Os01g05800,LOC_Os01g05870,LOC_Os01g06020,LOC_Os01g07630,LOC_Os01g07660,LOC_Os01g07730,LOC_Os01g08170,LOC_Os01g08340,LOC_Os01g09150,LOC_Os01g09320,LOC_Os01g…	7279	6058	32072	1.22699	2.63e-13	4.09e-13	5.26e-14
GOTERM_BP	GO:0009987	cellular process	1973	27.1054	9.97e-15	LOC_Os01g01120,LOC_Os01g01740,LOC_Os01g02360,LOC_Os01g02390,LOC_Os01g02400,LOC_Os01g02430,LOC_Os01g02590,LOC_Os01g02600,LOC_Os01g02610,LOC_Os01g02700,LOC_Os01g02760,LOC_Os01g02830,LOC_Os01g02840,LOC_Os01g02890,LOC_Os01g03144,LOC_Os01g03170,LOC_Os01g03190,LOC_Os01g03290,LOC_Os01g03750,LOC_Os01g03914,LOC_Os01g03950,LOC_Os01g04070,LOC_Os01g04190,LOC_Os01g04409,LOC_Os01g04430,LOC_Os01g04440,LOC_Os01g…	7279	7318	32072	1.18792	1.34e-11	1.73e-11	2.23e-12
GOTERM_CC	GO:0009536	plastid	1672	22.9702	1.67e-14	LOC_Os01g01120,LOC_Os01g01170,LOC_Os01g01600,LOC_Os01g01790,LOC_Os01g03020,LOC_Os01g03080,LOC_Os01g03130,LOC_Os01g03144,LOC_Os01g03750,LOC_Os01g03950,LOC_Os01g04130,LOC_Os01g04190,LOC_Os01g04630,LOC_Os01g04860,LOC_Os01g04900,LOC_Os01g05060,LOC_Os01g05070,LOC_Os01g05140,LOC_Os01g05800,LOC_Os01g06020,LOC_Os01g06500,LOC_Os01g06560,LOC_Os01g06640,LOC_Os01g07130,LOC_Os01g07260,LOC_Os01g07480,LOC_Os01g…	7279	6086	32072	1.21048	2.24e-11	2.48e-11	3.19e-12
GOTERM_CC	GO:0009535	chloroplast thylakoid membrane	149	2.04698	2.05e-14	LOC_Os01g04900,LOC_Os01g05070,LOC_Os01g05800,LOC_Os01g12710,LOC_Os01g17150,LOC_Os01g20110,LOC_Os01g31680,LOC_Os01g31690,LOC_Os01g32730,LOC_Os01g40710,LOC_Os01g43070,LOC_Os01g43150,LOC_Os01g47330,LOC_Os01g50860,LOC_Os01g55570,LOC_Os01g56680,LOC_Os01g58024,LOC_Os01g58470,LOC_Os01g59080,LOC_Os01g62500,LOC_Os01g63410,LOC_Os01g64270,LOC_Os01g66000,LOC_Os01g66600,LOC_Os01g67000,LOC_Os01g70400,LOC_Os01g…	7279	292	32072	2.24832	2.75e-11	2.67e-11	3.44e-12
GOTERM_BP	GO:0019288	isopentenyl diphosphate biosynthetic process, methylerythritol 4-phosphate pathway	89	1.2227	8.92e-13	LOC_Os01g16530,LOC_Os01g43070,LOC_Os01g44210,LOC_Os01g58790,LOC_Os01g68450,LOC_Os01g70400,LOC_Os01g71190,LOC_Os01g72800,LOC_Os02g01440,LOC_Os02g02390,LOC_Os02g04460,LOC_Os02g06300,LOC_Os02g07230,LOC_Os02g07680,LOC_Os02g15660,LOC_Os02g15750,LOC_Os02g38240,LOC_Os02g38820,LOC_Os02g45660,LOC_Os02g49326,LOC_Os02g51470,LOC_Os02g57020,LOC_Os02g57040,LOC_Os02g57670,LOC_Os02g58790,LOC_Os03g03360,LOC_Os03g…	7279	140	32072	2.80102	1.2e-09	1.03e-09	1.33e-10
GOTERM_BP	GO:0055114	oxidation-reduction process	501	6.88281	1.2e-12	LOC_Os01g01030,LOC_Os01g03620,LOC_Os01g03630,LOC_Os01g04120,LOC_Os01g07880,LOC_Os01g08810,LOC_Os01g09320,LOC_Os01g09430,LOC_Os01g10040,LOC_Os01g10110,LOC_Os01g10850,LOC_Os01g11150,LOC_Os01g11270,LOC_Os01g11340,LOC_Os01g12710,LOC_Os01g15830,LOC_Os01g18930,LOC_Os01g18970,LOC_Os01g19020,LOC_Os01g21380,LOC_Os01g22230,LOC_Os01g24810,LOC_Os01g24980,LOC_Os01g25189,LOC_Os01g25820,LOC_Os01g27750,LOC_Os01g…	7279	1532	32072	1.4409	1.61e-09	1.25e-09	1.61e-10
GOTERM_MF	GO:0016491	oxidoreductase activity	475	6.52562	1.43e-12	LOC_Os01g01030,LOC_Os01g03620,LOC_Os01g03630,LOC_Os01g07880,LOC_Os01g08810,LOC_Os01g09320,LOC_Os01g09430,LOC_Os01g10040,LOC_Os01g10110,LOC_Os01g10850,LOC_Os01g11150,LOC_Os01g11270,LOC_Os01g11340,LOC_Os01g12710,LOC_Os01g15830,LOC_Os01g18660,LOC_Os01g18930,LOC_Os01g18970,LOC_Os01g19020,LOC_Os01g21380,LOC_Os01g22230,LOC_Os01g24810,LOC_Os01g24980,LOC_Os01g25820,LOC_Os01g28030,LOC_Os01g29150,LOC_Os01g…	7279	1438	32072	1.45542	1.92e-09	1.35e-09	1.74e-10
GOTERM_BP	GO:0010027	thylakoid membrane organization	84	1.154	2.15e-12	LOC_Os01g05800,LOC_Os01g21820,LOC_Os01g25600,LOC_Os01g31680,LOC_Os01g43070,LOC_Os01g44210,LOC_Os01g59080,LOC_Os01g59090,LOC_Os01g62440,LOC_Os01g67000,LOC_Os01g68450,LOC_Os01g70400,LOC_Os01g72800,LOC_Os01g73540,LOC_Os02g01440,LOC_Os02g02390,LOC_Os02g03250,LOC_Os02g06300,LOC_Os02g15750,LOC_Os02g15900,LOC_Os02g16709,LOC_Os02g38820,LOC_Os02g39740,LOC_Os02g41470,LOC_Os02g45660,LOC_Os02g49326,LOC_Os02g…	7279	130	32072	2.84702	2.88e-09	1.87e-09	2.4e-10
GOTERM_MF	GO:0005524	ATP binding	937	12.8726	2.57e-12	LOC_Os01g01740,LOC_Os01g02250,LOC_Os01g02270,LOC_Os01g02360,LOC_Os01g02390,LOC_Os01g02400,LOC_Os01g02430,LOC_Os01g02590,LOC_Os01g02610,LOC_Os01g02700,LOC_Os01g02830,LOC_Os01g02840,LOC_Os01g03020,LOC_Os01g03030,LOC_Os01g03144,LOC_Os01g04409,LOC_Os01g04450,LOC_Os01g04460,LOC_Os01g04480,LOC_Os01g04550,LOC_Os01g04840,LOC_Os01g05620,LOC_Os01g05870,LOC_Os01g06020,LOC_Os01g06240,LOC_Os01g07630,LOC_Os01g…	7279	3219	32072	1.28255	3.45e-09	2.05e-09	2.64e-10
GOTERM_MF	GO:0003824	catalytic activity	1228	16.8704	2.76e-12	LOC_Os01g01030,LOC_Os01g01120,LOC_Os01g01650,LOC_Os01g01920,LOC_Os01g03020,LOC_Os01g03030,LOC_Os01g03170,LOC_Os01g03190,LOC_Os01g03290,LOC_Os01g03620,LOC_Os01g03630,LOC_Os01g03710,LOC_Os01g03950,LOC_Os01g04630,LOC_Os01g04660,LOC_Os01g05710,LOC_Os01g06020,LOC_Os01g06660,LOC_Os01g07500,LOC_Os01g07530,LOC_Os01g08810,LOC_Os01g09320,LOC_Os01g09430,LOC_Os01g10040,LOC_Os01g10110,LOC_Os01g10850,LOC_Os01g…	7279	4383	32072	1.23447	3.69e-09	2.05e-09	2.64e-10
GOTERM_MF	GO:0043531	ADP binding	190	2.61025	2.56e-11	LOC_Os01g02250,LOC_Os01g02270,LOC_Os01g05620,LOC_Os01g16390,LOC_Os01g21240,LOC_Os01g25630,LOC_Os01g25720,LOC_Os01g25760,LOC_Os01g52280,LOC_Os01g52290,LOC_Os01g52320,LOC_Os01g52330,LOC_Os01g57270,LOC_Os01g57280,LOC_Os01g58520,LOC_Os01g71100,LOC_Os01g72680,LOC_Os02g02640,LOC_Os02g04530,LOC_Os02g05692,LOC_Os02g09790,LOC_Os02g10550,LOC_Os02g10580,LOC_Os02g10900,LOC_Os02g18000,LOC_Os02g18080,LOC_Os02g…	7279	461	32072	1.81596	3.44e-08	1.78e-08	2.29e-09
GOTERM_BP	GO:0006915	apoptotic process	190	2.61025	7.92e-11	LOC_Os01g02250,LOC_Os01g02270,LOC_Os01g05620,LOC_Os01g16390,LOC_Os01g21240,LOC_Os01g25630,LOC_Os01g25720,LOC_Os01g25760,LOC_Os01g52280,LOC_Os01g52290,LOC_Os01g52320,LOC_Os01g52330,LOC_Os01g55260,LOC_Os01g57270,LOC_Os01g57280,LOC_Os01g58520,LOC_Os01g72680,LOC_Os02g02640,LOC_Os02g03280,LOC_Os02g04530,LOC_Os02g05692,LOC_Os02g09790,LOC_Os02g10550,LOC_Os02g10580,LOC_Os02g10900,LOC_Os02g18000,LOC_Os02g…	7279	469	32072	1.78499	1.06e-07	5.16e-08	6.64e-09
GOTERM_CC	GO:0009941	chloroplast envelope	182	2.50034	5.02e-10	LOC_Os01g03144,LOC_Os01g03750,LOC_Os01g04190,LOC_Os01g07260,LOC_Os01g13770,LOC_Os01g16530,LOC_Os01g17150,LOC_Os01g20110,LOC_Os01g21820,LOC_Os01g32350,LOC_Os01g32730,LOC_Os01g32830,LOC_Os01g43150,LOC_Os01g44210,LOC_Os01g45910,LOC_Os01g52864,LOC_Os01g53060,LOC_Os01g54540,LOC_Os01g56400,LOC_Os01g61380,LOC_Os01g66000,LOC_Os01g67000,LOC_Os01g68330,LOC_Os01g69950,LOC_Os02g02000,LOC_Os02g04460,LOC_Os02g…	7279	456	32072	1.75857	6.73e-07	3.08e-07	3.96e-08
GOTERM_BP	GO:0006950	response to stress	1035	14.219	9.07e-10	LOC_Os01g01790,LOC_Os01g02250,LOC_Os01g03620,LOC_Os01g03630,LOC_Os01g04070,LOC_Os01g04350,LOC_Os01g04380,LOC_Os01g04480,LOC_Os01g04550,LOC_Os01g04660,LOC_Os01g04870,LOC_Os01g05620,LOC_Os01g06660,LOC_Os01g06836,LOC_Os01g07110,LOC_Os01g07260,LOC_Os01g07430,LOC_Os01g07530,LOC_Os01g07590,LOC_Os01g08310,LOC_Os01g08700,LOC_Os01g08860,LOC_Os01g09800,LOC_Os01g10850,LOC_Os01g12520,LOC_Os01g12720,LOC_Os01g…	7279	3723	32072	1.2249	1.21e-06	5.07e-07	6.51e-08
GOTERM_BP	GO:0010207	photosystem II assembly	61	0.838027	9.23e-10	LOC_Os01g05800,LOC_Os01g31680,LOC_Os01g31690,LOC_Os01g44210,LOC_Os01g55570,LOC_Os01g56680,LOC_Os01g59080,LOC_Os01g66000,LOC_Os01g71190,LOC_Os01g72800,LOC_Os02g02520,LOC_Os02g03250,LOC_Os02g04460,LOC_Os02g15750,LOC_Os02g15900,LOC_Os02g16709,LOC_Os02g38820,LOC_Os02g39740,LOC_Os02g51470,LOC_Os02g52900,LOC_Os02g58120,LOC_Os02g58650,LOC_Os03g09060,LOC_Os03g14040,LOC_Os03g17070,LOC_Os03g21560,LOC_Os03g…	7279	91	32072	2.95354	1.24e-06	5.07e-07	6.51e-08
GOTERM_MF	GO:0016301	kinase activity	638	8.76494	1.29e-09	LOC_Os01g01740,LOC_Os01g02360,LOC_Os01g02390,LOC_Os01g02400,LOC_Os01g02430,LOC_Os01g02590,LOC_Os01g02600,LOC_Os01g02610,LOC_Os01g02700,LOC_Os01g02760,LOC_Os01g02830,LOC_Os01g02840,LOC_Os01g04070,LOC_Os01g04409,LOC_Os01g04430,LOC_Os01g04440,LOC_Os01g04450,LOC_Os01g04460,LOC_Os01g04470,LOC_Os01g04480,LOC_Os01g04490,LOC_Os01g04540,LOC_Os01g04550,LOC_Os01g05870,LOC_Os01g06240,LOC_Os01g07630,LOC_Os01g…	7279	2152	32072	1.30627	1.73e-06	6.73e-07	8.66e-08
GOTERM_MF	GO:0000166	nucleotide binding	1088	14.9471	2.41e-09	LOC_Os01g02250,LOC_Os01g02360,LOC_Os01g02390,LOC_Os01g02400,LOC_Os01g02430,LOC_Os01g02590,LOC_Os01g02610,LOC_Os01g02700,LOC_Os01g02760,LOC_Os01g02830,LOC_Os01g03020,LOC_Os01g03030,LOC_Os01g03144,LOC_Os01g04409,LOC_Os01g04430,LOC_Os01g04440,LOC_Os01g04450,LOC_Os01g04460,LOC_Os01g04470,LOC_Os01g04480,LOC_Os01g04540,LOC_Os01g04840,LOC_Os01g04870,LOC_Os01g05620,LOC_Os01g05870,LOC_Os01g06020,LOC_Os01g…	7279	3959	32072	1.21087	3.23e-06	1.2e-06	1.54e-07
GOTERM_BP	GO:0015979	photosynthesis	128	1.75848	4.68e-09	LOC_Os01g19740,LOC_Os01g21820,LOC_Os01g25600,LOC_Os01g31690,LOC_Os01g37130,LOC_Os01g39960,LOC_Os01g43070,LOC_Os01g44210,LOC_Os01g56680,LOC_Os01g58020,LOC_Os01g58022,LOC_Os01g58470,LOC_Os01g59090,LOC_Os01g68450,LOC_Os01g71190,LOC_Os01g72800,LOC_Os02g02520,LOC_Os02g03250,LOC_Os02g05830,LOC_Os02g06300,LOC_Os02g15750,LOC_Os02g24632,LOC_Os02g24634,LOC_Os02g24642,LOC_Os02g33610,LOC_Os02g38820,LOC_Os02g…	7279	295	32072	1.9118	6.28e-06	2.22e-06	2.85e-07
GOTERM_BP	GO:0009058	biosynthetic process	1264	17.365	8.63e-09	LOC_Os01g01120,LOC_Os01g01600,LOC_Os01g01840,LOC_Os01g02890,LOC_Os01g03080,LOC_Os01g03570,LOC_Os01g03750,LOC_Os01g04120,LOC_Os01g04930,LOC_Os01g05710,LOC_Os01g06640,LOC_Os01g07110,LOC_Os01g07260,LOC_Os01g07430,LOC_Os01g07450,LOC_Os01g07500,LOC_Os01g07530,LOC_Os01g07880,LOC_Os01g08100,LOC_Os01g08160,LOC_Os01g08680,LOC_Os01g08700,LOC_Os01g08710,LOC_Os01g09320,LOC_Os01g09590,LOC_Os01g09800,LOC_Os01g…	7279	4709	32072	1.18269	1.16e-05	3.91e-06	5.03e-07
GOTERM_CC	GO:0005576	extracellular region	294	4.03902	1.76e-08	LOC_Os01g01650,LOC_Os01g03310,LOC_Os01g03320,LOC_Os01g03380,LOC_Os01g03680,LOC_Os01g03950,LOC_Os01g04190,LOC_Os01g10110,LOC_Os01g10850,LOC_Os01g11260,LOC_Os01g14650,LOC_Os01g14670,LOC_Os01g16200,LOC_Os01g16310,LOC_Os01g19220,LOC_Os01g23740,LOC_Os01g28500,LOC_Os01g34920,LOC_Os01g43160,LOC_Os01g44330,LOC_Os01g45274,LOC_Os01g46290,LOC_Os01g47400,LOC_Os01g48020,LOC_Os01g49650,LOC_Os01g54300,LOC_Os01g…	7279	883	32072	1.46704	2.36e-05	7.66e-06	9.85e-07
GOTERM_MF	GO:0016772	transferase activity, transferring phosphorus-containing groups	445	6.11348	2.24e-08	LOC_Os01g01740,LOC_Os01g02360,LOC_Os01g02390,LOC_Os01g02400,LOC_Os01g02430,LOC_Os01g02590,LOC_Os01g02610,LOC_Os01g02700,LOC_Os01g02830,LOC_Os01g02840,LOC_Os01g04409,LOC_Os01g04450,LOC_Os01g04460,LOC_Os01g04480,LOC_Os01g04550,LOC_Os01g05870,LOC_Os01g06240,LOC_Os01g07630,LOC_Os01g07940,LOC_Os01g10450,LOC_Os01g12290,LOC_Os01g12390,LOC_Os01g12400,LOC_Os01g12720,LOC_Os01g13800,LOC_Os01g14510,LOC_Os01g…	7279	1452	32072	1.35035	3e-05	9.33e-06	1.2e-06
GOTERM_BP	GO:0006098	pentose-phosphate shunt	69	0.947932	2.58e-08	LOC_Os01g39270,LOC_Os01g44210,LOC_Os01g59080,LOC_Os01g64270,LOC_Os01g66000,LOC_Os01g68450,LOC_Os01g70170,LOC_Os01g73540,LOC_Os02g02390,LOC_Os02g06300,LOC_Os02g07230,LOC_Os02g38840,LOC_Os02g45660,LOC_Os02g51020,LOC_Os02g51470,LOC_Os02g57020,LOC_Os02g58790,LOC_Os03g06230,LOC_Os03g07300,LOC_Os03g14040,LOC_Os03g17070,LOC_Os03g20100,LOC_Os03g20560,LOC_Os03g22780,LOC_Os03g45710,LOC_Os03g47610,LOC_Os03g…	7279	125	32072	2.43217	3.46e-05	1.04e-05	1.33e-06
GOTERM_BP	GO:0009902	chloroplast relocation	49	0.673169	3.29e-08	LOC_Os01g05800,LOC_Os01g31680,LOC_Os01g44210,LOC_Os01g59080,LOC_Os01g62440,LOC_Os01g68450,LOC_Os01g72800,LOC_Os02g01440,LOC_Os02g02390,LOC_Os02g03250,LOC_Os02g06300,LOC_Os02g15750,LOC_Os02g15900,LOC_Os02g16709,LOC_Os02g38820,LOC_Os02g39740,LOC_Os02g49326,LOC_Os03g10060,LOC_Os03g20100,LOC_Os03g29810,LOC_Os03g52460,LOC_Os03g60910,LOC_Os03g61030,LOC_Os03g62750,LOC_Os03g62780,LOC_Os04g01540,LOC_Os04g…	7279	72	32072	2.9986	4.41e-05	1.25e-05	1.61e-06
GOTERM_MF	GO:0004872	receptor activity	203	2.78884	3.36e-08	LOC_Os01g02400,LOC_Os01g02430,LOC_Os01g04450,LOC_Os01g04460,LOC_Os01g04480,LOC_Os01g06240,LOC_Os01g07630,LOC_Os01g12290,LOC_Os01g12720,LOC_Os01g14510,LOC_Os01g16910,LOC_Os01g33090,LOC_Os01g40499,LOC_Os01g42294,LOC_Os01g45520,LOC_Os01g47900,LOC_Os01g48040,LOC_Os01g49529,LOC_Os01g49580,LOC_Os01g52050,LOC_Os01g57540,LOC_Os01g63280,LOC_Os01g66020,LOC_Os01g66250,LOC_Os01g66610,LOC_Os01g68870,LOC_Os01g…	7279	563	32072	1.5887	4.5e-05	1.25e-05	1.61e-06
GOTERM_MF	GO:0004672	protein kinase activity	434	5.96236	4.1e-08	LOC_Os01g01740,LOC_Os01g02360,LOC_Os01g02390,LOC_Os01g02400,LOC_Os01g02430,LOC_Os01g02590,LOC_Os01g02610,LOC_Os01g02700,LOC_Os01g02830,LOC_Os01g02840,LOC_Os01g04409,LOC_Os01g04450,LOC_Os01g04460,LOC_Os01g04480,LOC_Os01g04550,LOC_Os01g05870,LOC_Os01g06240,LOC_Os01g07630,LOC_Os01g07940,LOC_Os01g10450,LOC_Os01g12290,LOC_Os01g12390,LOC_Os01g12400,LOC_Os01g12720,LOC_Os01g13800,LOC_Os01g14510,LOC_Os01g…	7279	1419	32072	1.3476	5.49e-05	1.47e-05	1.89e-06
GOTERM_MF	GO:0004674	protein serine/threonine kinase activity	426	5.85245	4.25e-08	LOC_Os01g01740,LOC_Os01g02360,LOC_Os01g02390,LOC_Os01g02400,LOC_Os01g02430,LOC_Os01g02590,LOC_Os01g02610,LOC_Os01g02700,LOC_Os01g02830,LOC_Os01g02840,LOC_Os01g04409,LOC_Os01g04450,LOC_Os01g04460,LOC_Os01g04480,LOC_Os01g04550,LOC_Os01g05870,LOC_Os01g06240,LOC_Os01g07630,LOC_Os01g07940,LOC_Os01g10450,LOC_Os01g12290,LOC_Os01g12390,LOC_Os01g12400,LOC_Os01g12720,LOC_Os01g13800,LOC_Os01g14510,LOC_Os01g…	7279	1389	32072	1.35133	5.7e-05	1.48e-05	1.9e-06
GOTERM_BP	GO:0042793	transcription from plastid promoter	41	0.563264	6.03e-08	LOC_Os01g05800,LOC_Os01g31680,LOC_Os01g56350,LOC_Os01g67570,LOC_Os01g72800,LOC_Os02g01440,LOC_Os02g02390,LOC_Os02g03250,LOC_Os02g15900,LOC_Os02g16709,LOC_Os02g38820,LOC_Os02g39740,LOC_Os02g51790,LOC_Os03g29810,LOC_Os03g40550,LOC_Os03g45400,LOC_Os03g52640,LOC_Os03g60910,LOC_Os03g61030,LOC_Os03g62780,LOC_Os04g23890,LOC_Os04g45490,LOC_Os04g50110,LOC_Os05g28200,LOC_Os05g32220,LOC_Os05g32390,LOC_Os05g…	7279	54	32072	3.34537	8.09e-05	2.02e-05	2.59e-06
GOTERM_CC	GO:0005623	cell	759	10.4273	6.2e-08	LOC_Os01g02360,LOC_Os01g02390,LOC_Os01g02400,LOC_Os01g02430,LOC_Os01g02600,LOC_Os01g02610,LOC_Os01g02700,LOC_Os01g02710,LOC_Os01g02760,LOC_Os01g02830,LOC_Os01g02840,LOC_Os01g04460,LOC_Os01g04490,LOC_Os01g06240,LOC_Os01g06250,LOC_Os01g06836,LOC_Os01g07030,LOC_Os01g07040,LOC_Os01g07050,LOC_Os01g07500,LOC_Os01g07570,LOC_Os01g08810,LOC_Os01g10040,LOC_Os01g10080,LOC_Os01g11220,LOC_Os01g11650,LOC_Os01g…	7279	2702	32072	1.23769	8.31e-05	2.02e-05	2.59e-06
GOTERM_BP	GO:0006952	defense response	221	3.03613	6.38e-08	LOC_Os01g02250,LOC_Os01g02270,LOC_Os01g05620,LOC_Os01g16390,LOC_Os01g21240,LOC_Os01g25630,LOC_Os01g25720,LOC_Os01g25760,LOC_Os01g48680,LOC_Os01g52280,LOC_Os01g52320,LOC_Os01g52330,LOC_Os01g57270,LOC_Os01g57280,LOC_Os01g63060,LOC_Os01g71100,LOC_Os01g71690,LOC_Os01g72680,LOC_Os02g01800,LOC_Os02g02640,LOC_Os02g04530,LOC_Os02g05692,LOC_Os02g05960,LOC_Os02g06090,LOC_Os02g06200,LOC_Os02g09790,LOC_Os02g…	7279	633	32072	1.53831	8.55e-05	2.02e-05	2.59e-06
GOTERM_MF	GO:0016740	transferase activity	677	9.30073	7.98e-08	LOC_Os01g01520,LOC_Os01g02360,LOC_Os01g02890,LOC_Os01g02920,LOC_Os01g02930,LOC_Os01g05810,LOC_Os01g06240,LOC_Os01g07500,LOC_Os01g07530,LOC_Os01g07940,LOC_Os01g08100,LOC_Os01g08440,LOC_Os01g09570,LOC_Os01g10140,LOC_Os01g11260,LOC_Os01g12290,LOC_Os01g13690,LOC_Os01g15490,LOC_Os01g18620,LOC_Os01g18744,LOC_Os01g18800,LOC_Os01g19390,LOC_Os01g20206,LOC_Os01g21160,LOC_Os01g24920,LOC_Os01g24940,LOC_Os01g…	7279	2380	32072	1.25333	0.000106958	2.45e-05	3.15e-06
GOTERM_CC	GO:0005886	plasma membrane	1031	14.164	8.8e-08	LOC_Os01g01030,LOC_Os01g01390,LOC_Os01g01650,LOC_Os01g02590,LOC_Os01g03914,LOC_Os01g04409,LOC_Os01g04430,LOC_Os01g04440,LOC_Os01g04450,LOC_Os01g04470,LOC_Os01g04540,LOC_Os01g04660,LOC_Os01g05070,LOC_Os01g05870,LOC_Os01g07590,LOC_Os01g07630,LOC_Os01g08340,LOC_Os01g09320,LOC_Os01g09570,LOC_Os01g10450,LOC_Os01g11230,LOC_Os01g11414,LOC_Os01g11860,LOC_Os01g12390,LOC_Os01g12690,LOC_Os01g12720,LOC_Os01g…	7279	3811	32072	1.19199	0.000117951	2.62e-05	3.37e-06
GOTERM_BP	GO:0006468	protein phosphorylation	439	6.03105	9.46e-08	LOC_Os01g01740,LOC_Os01g02360,LOC_Os01g02390,LOC_Os01g02400,LOC_Os01g02430,LOC_Os01g02590,LOC_Os01g02610,LOC_Os01g02700,LOC_Os01g02830,LOC_Os01g02840,LOC_Os01g04409,LOC_Os01g04450,LOC_Os01g04460,LOC_Os01g04480,LOC_Os01g04550,LOC_Os01g05870,LOC_Os01g06240,LOC_Os01g07630,LOC_Os01g07940,LOC_Os01g10450,LOC_Os01g12290,LOC_Os01g12390,LOC_Os01g12400,LOC_Os01g12720,LOC_Os01g13800,LOC_Os01g14510,LOC_Os01g…	7279	1451	32072	1.33307	0.000126819	2.74e-05	3.52e-06
GOTERM_BP	GO:0006364	rRNA processing	86	1.18148	1.07e-07	LOC_Os01g05800,LOC_Os01g06020,LOC_Os01g31110,LOC_Os01g31680,LOC_Os01g44210,LOC_Os01g45370,LOC_Os01g53150,LOC_Os01g55570,LOC_Os01g56680,LOC_Os01g62440,LOC_Os01g72800,LOC_Os01g74190,LOC_Os02g01440,LOC_Os02g03250,LOC_Os02g04460,LOC_Os02g06300,LOC_Os02g07230,LOC_Os02g15750,LOC_Os02g15900,LOC_Os02g16709,LOC_Os02g38240,LOC_Os02g38820,LOC_Os02g39740,LOC_Os02g41470,LOC_Os02g45660,LOC_Os02g51020,LOC_Os02g…	7279	182	32072	2.082	0.000143947	3.03e-05	3.89e-06
GOTERM_BP	GO:0034660	ncRNA metabolic process	43	0.59074	1.22e-07	LOC_Os01g05800,LOC_Os01g31680,LOC_Os01g44210,LOC_Os01g59080,LOC_Os01g62440,LOC_Os01g68450,LOC_Os01g72800,LOC_Os02g01440,LOC_Os02g02390,LOC_Os02g06300,LOC_Os02g15750,LOC_Os02g16709,LOC_Os02g38820,LOC_Os02g39740,LOC_Os02g49326,LOC_Os03g10060,LOC_Os03g20100,LOC_Os03g29810,LOC_Os03g52460,LOC_Os03g60910,LOC_Os03g61030,LOC_Os03g62750,LOC_Os03g62780,LOC_Os04g01540,LOC_Os04g23890,LOC_Os04g45490,LOC_Os04g…	7279	61	32072	3.10594	0.000163959	3.36e-05	4.31e-06
GOTERM_CC	GO:0031977	thylakoid lumen	38	0.52205	2.69e-07	LOC_Os01g31690,LOC_Os01g43070,LOC_Os01g47450,LOC_Os01g59090,LOC_Os02g02550,LOC_Os02g17920,LOC_Os03g55820,LOC_Os03g55874,LOC_Os04g31040,LOC_Os04g38640,LOC_Os04g51300,LOC_Os04g53490,LOC_Os04g57020,LOC_Os05g01270,LOC_Os05g14194,LOC_Os05g33280,LOC_Os06g01210,LOC_Os06g01850,LOC_Os06g45340,LOC_Os06g45820,LOC_Os06g49160,LOC_Os06g51029,LOC_Os07g30800,LOC_Os07g34950,LOC_Os07g37830,LOC_Os08g19610,LOC_Os08g…	7279	51	32072	3.28298	0.00036024	7.18e-05	9.23e-06
GOTERM_MF	GO:0004713	protein tyrosine kinase activity	399	5.48152	2.76e-07	LOC_Os01g01740,LOC_Os01g02360,LOC_Os01g02390,LOC_Os01g02400,LOC_Os01g02430,LOC_Os01g02610,LOC_Os01g02700,LOC_Os01g02830,LOC_Os01g02840,LOC_Os01g04409,LOC_Os01g04450,LOC_Os01g04460,LOC_Os01g04480,LOC_Os01g04550,LOC_Os01g05870,LOC_Os01g06240,LOC_Os01g07630,LOC_Os01g07940,LOC_Os01g10450,LOC_Os01g12290,LOC_Os01g12390,LOC_Os01g12400,LOC_Os01g12720,LOC_Os01g13800,LOC_Os01g14510,LOC_Os01g15470,LOC_Os01g…	7279	1314	32072	1.33793	0.000369322	7.18e-05	9.23e-06
GOTERM_CC	GO:0009534	chloroplast thylakoid	60	0.824289	2.98e-07	LOC_Os01g05800,LOC_Os01g32350,LOC_Os01g40710,LOC_Os01g59090,LOC_Os01g67000,LOC_Os01g72800,LOC_Os02g03250,LOC_Os02g15750,LOC_Os02g17650,LOC_Os02g38210,LOC_Os02g38820,LOC_Os02g42960,LOC_Os02g49570,LOC_Os02g51470,LOC_Os02g57020,LOC_Os03g06230,LOC_Os03g08570,LOC_Os03g14040,LOC_Os03g17070,LOC_Os03g18020,LOC_Os03g19510,LOC_Os03g21560,LOC_Os03g22780,LOC_Os03g29810,LOC_Os03g34040,LOC_Os03g55820,LOC_Os03g…	7279	110	32072	2.40333	0.000399687	7.58e-05	9.75e-06
GOTERM_MF	GO:0005509	calcium ion binding	172	2.36296	4.24e-07	LOC_Os01g11414,LOC_Os01g15830,LOC_Os01g16240,LOC_Os01g17190,LOC_Os01g18930,LOC_Os01g19020,LOC_Os01g22230,LOC_Os01g25820,LOC_Os01g26270,LOC_Os01g26280,LOC_Os01g28030,LOC_Os01g31690,LOC_Os01g32120,LOC_Os01g39770,LOC_Os01g41510,LOC_Os01g43070,LOC_Os01g48680,LOC_Os01g51420,LOC_Os01g51550,LOC_Os01g51754,LOC_Os01g59090,LOC_Os01g61590,LOC_Os01g72080,LOC_Os02g03020,LOC_Os02g06340,LOC_Os02g14440,LOC_Os02g…	7279	478	32072	1.58546	0.000567573	0.000105109	1.35e-05
GOTERM_MF	GO:0003674	molecular_function	1533	21.0606	5.75e-07	LOC_Os01g01170,LOC_Os01g01390,LOC_Os01g01450,LOC_Os01g03080,LOC_Os01g03130,LOC_Os01g03570,LOC_Os01g04010,LOC_Os01g04860,LOC_Os01g05060,LOC_Os01g05070,LOC_Os01g05440,LOC_Os01g06130,LOC_Os01g06140,LOC_Os01g06150,LOC_Os01g06230,LOC_Os01g06250,LOC_Os01g06460,LOC_Os01g06560,LOC_Os01g07030,LOC_Os01g07040,LOC_Os01g07050,LOC_Os01g07130,LOC_Os01g07140,LOC_Os01g07260,LOC_Os01g07330,LOC_Os01g07340,LOC_Os01g…	7279	5946	32072	1.13598	0.000770317	0.000139338	1.79e-05
GOTERM_BP	GO:0009658	chloroplast organization	49	0.673169	1.58e-06	LOC_Os01g06020,LOC_Os01g21820,LOC_Os01g31110,LOC_Os01g53150,LOC_Os01g58470,LOC_Os01g61320,LOC_Os01g62440,LOC_Os01g74190,LOC_Os02g01440,LOC_Os02g15900,LOC_Os02g38240,LOC_Os02g39040,LOC_Os02g39740,LOC_Os02g41470,LOC_Os03g20010,LOC_Os03g29810,LOC_Os03g31300,LOC_Os03g38230,LOC_Os03g40550,LOC_Os03g52640,LOC_Os03g57840,LOC_Os03g60910,LOC_Os03g62750,LOC_Os03g64210,LOC_Os04g45490,LOC_Os04g52520,LOC_Os04g…	7279	86	32072	2.51045	0.00211218	0.000373376	4.8e-05
GOTERM_BP	GO:0016310	phosphorylation	355	4.87704	1.76e-06	LOC_Os01g02360,LOC_Os01g02390,LOC_Os01g02400,LOC_Os01g02430,LOC_Os01g02700,LOC_Os01g02830,LOC_Os01g02840,LOC_Os01g04409,LOC_Os01g04450,LOC_Os01g04460,LOC_Os01g04480,LOC_Os01g06240,LOC_Os01g07630,LOC_Os01g07940,LOC_Os01g09570,LOC_Os01g12290,LOC_Os01g12720,LOC_Os01g13800,LOC_Os01g15480,LOC_Os01g18800,LOC_Os01g26310,LOC_Os01g33090,LOC_Os01g40499,LOC_Os01g42294,LOC_Os01g43910,LOC_Os01g45520,LOC_Os01g…	7279	1174	32072	1.33234	0.00235775	0.000407525	5.24e-05
GOTERM_BP	GO:0008150	biological_process	2037	27.9846	3.17e-06	LOC_Os01g01115,LOC_Os01g01170,LOC_Os01g01390,LOC_Os01g01450,LOC_Os01g01520,LOC_Os01g01920,LOC_Os01g02710,LOC_Os01g02920,LOC_Os01g02930,LOC_Os01g03130,LOC_Os01g03570,LOC_Os01g03950,LOC_Os01g04010,LOC_Os01g04190,LOC_Os01g04860,LOC_Os01g05060,LOC_Os01g05070,LOC_Os01g05440,LOC_Os01g06130,LOC_Os01g06140,LOC_Os01g06150,LOC_Os01g06250,LOC_Os01g06460,LOC_Os01g06560,LOC_Os01g07030,LOC_Os01g07040,LOC_Os01g…	7279	8141	32072	1.10247	0.00424815	0.000718308	9.24e-05
GOTERM_BP	GO:0019684	photosynthesis, light reaction	40	0.549526	5.33e-06	LOC_Os01g31690,LOC_Os01g42234,LOC_Os01g55570,LOC_Os01g58020,LOC_Os01g58022,LOC_Os01g58024,LOC_Os01g72950,LOC_Os02g07230,LOC_Os02g15750,LOC_Os02g24632,LOC_Os02g24634,LOC_Os02g38820,LOC_Os02g51020,LOC_Os02g51470,LOC_Os03g02690,LOC_Os03g14040,LOC_Os03g17070,LOC_Os03g21560,LOC_Os03g52460,LOC_Os04g16680,LOC_Os04g16732,LOC_Os04g16742,LOC_Os04g51300,LOC_Os05g33280,LOC_Os05g33520,LOC_Os06g01850,LOC_Os06g…	7279	66	32072	2.67036	0.00713729	0.00116836	0.000150213
GOTERM_BP	GO:0016556	mRNA modification	37	0.508312	5.38e-06	LOC_Os01g42280,LOC_Os01g47450,LOC_Os01g66000,LOC_Os02g15660,LOC_Os02g39740,LOC_Os02g50010,LOC_Os03g02430,LOC_Os03g04580,LOC_Os03g09060,LOC_Os03g53710,LOC_Os03g56869,LOC_Os03g64350,LOC_Os04g23890,LOC_Os04g40530,LOC_Os04g51350,LOC_Os05g25880,LOC_Os06g20320,LOC_Os06g30380,LOC_Os06g45370,LOC_Os06g50130,LOC_Os07g06940,LOC_Os07g06990,LOC_Os07g09370,LOC_Os07g23990,LOC_Os07g28400,LOC_Os07g37830,LOC_Os07g…	7279	58	32072	2.81079	0.00721025	0.00116836	0.000150213
GOTERM_MF	GO:0003700	sequence-specific DNA binding transcription factor activity	528	7.25374	6.73e-06	LOC_Os01g01600,LOC_Os01g04120,LOC_Os01g04930,LOC_Os01g06640,LOC_Os01g07430,LOC_Os01g07880,LOC_Os01g08160,LOC_Os01g08680,LOC_Os01g08710,LOC_Os01g09590,LOC_Os01g09850,LOC_Os01g10320,LOC_Os01g11350,LOC_Os01g13000,LOC_Os01g13520,LOC_Os01g13540,LOC_Os01g13740,LOC_Os01g14010,LOC_Os01g14440,LOC_Os01g15250,LOC_Os01g15640,LOC_Os01g18240,LOC_Os01g18870,LOC_Os01g19970,LOC_Os01g32920,LOC_Os01g36229,LOC_Os01g…	7279	1877	32072	1.23944	0.00902451	0.00143251	0.000184174
GOTERM_BP	GO:0006464	cellular protein modification process	786	10.7982	6.91e-06	LOC_Os01g01740,LOC_Os01g02360,LOC_Os01g02390,LOC_Os01g02400,LOC_Os01g02430,LOC_Os01g02590,LOC_Os01g02600,LOC_Os01g02610,LOC_Os01g02700,LOC_Os01g02760,LOC_Os01g02830,LOC_Os01g02840,LOC_Os01g03080,LOC_Os01g03170,LOC_Os01g03190,LOC_Os01g03290,LOC_Os01g04409,LOC_Os01g04430,LOC_Os01g04440,LOC_Os01g04450,LOC_Os01g04460,LOC_Os01g04470,LOC_Os01g04490,LOC_Os01g04540,LOC_Os01g05710,LOC_Os01g05870,LOC_Os01g…	7279	2920	32072	1.18603	0.00926003	0.00144049	0.000185201
GOTERM_CC	GO:0009543	chloroplast thylakoid lumen	31	0.425883	8.51e-06	LOC_Os01g31690,LOC_Os01g43070,LOC_Os01g47450,LOC_Os01g59090,LOC_Os02g02550,LOC_Os02g42960,LOC_Os02g51570,LOC_Os02g57020,LOC_Os03g21560,LOC_Os03g53640,LOC_Os04g31040,LOC_Os04g38640,LOC_Os04g51300,LOC_Os05g01270,LOC_Os05g33280,LOC_Os06g01210,LOC_Os06g45340,LOC_Os06g49160,LOC_Os07g01480,LOC_Os07g30800,LOC_Os07g34950,LOC_Os07g37830,LOC_Os08g25900,LOC_Os08g29370,LOC_Os10g18370,LOC_Os10g32400,LOC_Os10g…	7279	44	32072	3.1043	0.011401	0.00173877	0.00022355
GOTERM_MF	GO:0009055	electron carrier activity	265	3.64061	1.26e-05	LOC_Os01g08810,LOC_Os01g09430,LOC_Os01g10040,LOC_Os01g10850,LOC_Os01g11270,LOC_Os01g11340,LOC_Os01g15830,LOC_Os01g17470,LOC_Os01g18930,LOC_Os01g18970,LOC_Os01g19020,LOC_Os01g22230,LOC_Os01g23740,LOC_Os01g24810,LOC_Os01g25820,LOC_Os01g28030,LOC_Os01g29150,LOC_Os01g38110,LOC_Os01g43020,LOC_Os01g43720,LOC_Os01g43750,LOC_Os01g43760,LOC_Os01g43851,LOC_Os01g45760,LOC_Os01g48960,LOC_Os01g51550,LOC_Os01g…	7279	860	32072	1.35769	0.0169078	0.00252902	0.000325151
GOTERM_CC	GO:0016021	integral component of membrane	631	8.66877	1.77e-05	LOC_Os01g01360,LOC_Os01g02150,LOC_Os01g03914,LOC_Os01g04190,LOC_Os01g05430,LOC_Os01g05800,LOC_Os01g05870,LOC_Os01g07630,LOC_Os01g07730,LOC_Os01g10040,LOC_Os01g11220,LOC_Os01g11260,LOC_Os01g11414,LOC_Os01g11946,LOC_Os01g11980,LOC_Os01g12220,LOC_Os01g12520,LOC_Os01g12690,LOC_Os01g12710,LOC_Os01g13120,LOC_Os01g13740,LOC_Os01g13770,LOC_Os01g13800,LOC_Os01g15770,LOC_Os01g16330,LOC_Os01g17010,LOC_Os01g…	7279	2313	32072	1.20201	0.0236976	0.00347775	0.000447125
GOTERM_BP	GO:0019252	starch biosynthetic process	51	0.700646	1.86e-05	LOC_Os01g11946,LOC_Os01g31680,LOC_Os01g43070,LOC_Os01g59080,LOC_Os01g64270,LOC_Os01g66000,LOC_Os01g68450,LOC_Os01g73540,LOC_Os02g02390,LOC_Os02g07350,LOC_Os02g49326,LOC_Os02g49820,LOC_Os02g50010,LOC_Os02g51020,LOC_Os02g51470,LOC_Os03g19510,LOC_Os03g22330,LOC_Os03g47610,LOC_Os03g52460,LOC_Os04g01540,LOC_Os04g16680,LOC_Os04g23890,LOC_Os04g38640,LOC_Os04g40530,LOC_Os04g45490,LOC_Os04g51300,LOC_Os05g…	7279	103	32072	2.18166	0.0249291	0.00359072	0.000461651
GOTERM_BP	GO:0000023	maltose metabolic process	41	0.563264	2.48e-05	LOC_Os01g11946,LOC_Os01g31680,LOC_Os01g43070,LOC_Os01g59080,LOC_Os01g64270,LOC_Os01g66000,LOC_Os01g73540,LOC_Os02g07350,LOC_Os02g49326,LOC_Os02g49820,LOC_Os02g50010,LOC_Os02g51020,LOC_Os03g19510,LOC_Os03g22330,LOC_Os03g47610,LOC_Os04g01540,LOC_Os04g16680,LOC_Os04g23890,LOC_Os04g38640,LOC_Os04g40530,LOC_Os04g45490,LOC_Os05g01530,LOC_Os05g29760,LOC_Os05g35540,LOC_Os05g41190,LOC_Os05g45030,LOC_Os05g…	7279	75	32072	2.40867	0.0332086	0.00469631	0.000603793
GOTERM_BP	GO:0010103	stomatal complex morphogenesis	32	0.439621	3.17e-05	LOC_Os01g39960,LOC_Os01g50860,LOC_Os01g52050,LOC_Os01g55570,LOC_Os02g15660,LOC_Os02g19640,LOC_Os02g53720,LOC_Os03g09060,LOC_Os03g45400,LOC_Os03g48040,LOC_Os03g60910,LOC_Os04g16680,LOC_Os04g23890,LOC_Os04g51300,LOC_Os05g33520,LOC_Os05g35470,LOC_Os05g50900,LOC_Os05g50980,LOC_Os06g01850,LOC_Os06g20320,LOC_Os06g42220,LOC_Os06g45340,LOC_Os07g05740,LOC_Os07g06940,LOC_Os07g37830,LOC_Os07g43370,LOC_Os08g…	7279	51	32072	2.76461	0.0424206	0.00589193	0.000757511
GOTERM_BP	GO:0019748	secondary metabolic process	162	2.22558	7.24e-05	LOC_Os01g07880,LOC_Os01g08100,LOC_Os01g18120,LOC_Os01g19970,LOC_Os01g24980,LOC_Os01g27390,LOC_Os01g27480,LOC_Os01g40860,LOC_Os01g40870,LOC_Os01g44330,LOC_Os01g45200,LOC_Os01g50520,LOC_Os01g50530,LOC_Os01g50570,LOC_Os01g50580,LOC_Os01g55830,LOC_Os01g62480,LOC_Os01g62490,LOC_Os01g63200,LOC_Os01g72120,LOC_Os01g72130,LOC_Os01g72140,LOC_Os01g72170,LOC_Os02g07430,LOC_Os02g08500,LOC_Os02g09490,LOC_Os02g…	7279	497	32072	1.43619	0.0970002	0.0131777	0.00169423
GOTERM_BP	GO:0015995	chlorophyll biosynthetic process	40	0.549526	7.33e-05	LOC_Os01g32730,LOC_Os01g43390,LOC_Os01g44210,LOC_Os02g02390,LOC_Os02g04460,LOC_Os02g06300,LOC_Os02g07230,LOC_Os02g15750,LOC_Os02g37470,LOC_Os02g38820,LOC_Os02g45660,LOC_Os02g51020,LOC_Os02g51470,LOC_Os03g10060,LOC_Os03g20100,LOC_Os03g20560,LOC_Os03g21900,LOC_Os03g22780,LOC_Os03g36540,LOC_Os03g45710,LOC_Os03g59640,LOC_Os03g62780,LOC_Os04g31040,LOC_Os04g50110,LOC_Os04g51300,LOC_Os05g28200,LOC_Os05g…	7279	77	32072	2.28888	0.0982653	0.0131777	0.00169423
GOTERM_MF	GO:0030246	carbohydrate binding	123	1.68979	8.04e-05	LOC_Os01g03950,LOC_Os01g06240,LOC_Os01g06500,LOC_Os01g12290,LOC_Os01g12400,LOC_Os01g16310,LOC_Os01g20880,LOC_Os01g34920,LOC_Os01g40499,LOC_Os01g45520,LOC_Os01g47900,LOC_Os01g48020,LOC_Os01g48040,LOC_Os01g62380,LOC_Os01g66250,LOC_Os01g66610,LOC_Os01g66680,LOC_Os01g73390,LOC_Os02g06360,LOC_Os02g08030,LOC_Os02g10860,LOC_Os02g19530,LOC_Os02g36600,LOC_Os02g48210,LOC_Os02g52850,LOC_Os02g56750,LOC_Os03g…	7279	356	32072	1.52233	0.107705	0.0141988	0.00182551
GOTERM_BP	GO:0006629	lipid metabolic process	302	4.14892	8.18e-05	LOC_Os01g02890,LOC_Os01g03750,LOC_Os01g04660,LOC_Os01g05710,LOC_Os01g09320,LOC_Os01g10040,LOC_Os01g11150,LOC_Os01g11260,LOC_Os01g11650,LOC_Os01g11750,LOC_Os01g11760,LOC_Os01g12381,LOC_Os01g15000,LOC_Os01g22780,LOC_Os01g25189,LOC_Os01g29150,LOC_Os01g32730,LOC_Os01g34560,LOC_Os01g38580,LOC_Os01g39960,LOC_Os01g42730,LOC_Os01g44130,LOC_Os01g46080,LOC_Os01g46090,LOC_Os01g46260,LOC_Os01g46290,LOC_Os01g…	7279	1033	32072	1.28813	0.109653	0.0142147	0.00182755
GOTERM_MF	GO:0016757	transferase activity, transferring glycosyl groups	144	1.97829	8.7e-05	LOC_Os01g02920,LOC_Os01g02930,LOC_Os01g07530,LOC_Os01g08440,LOC_Os01g24920,LOC_Os01g24940,LOC_Os01g40480,LOC_Os01g49230,LOC_Os01g53330,LOC_Os01g53390,LOC_Os01g53420,LOC_Os01g56130,LOC_Os01g59110,LOC_Os01g63840,LOC_Os01g65260,LOC_Os01g65780,LOC_Os01g67870,LOC_Os01g70190,LOC_Os02g02620,LOC_Os02g04250,LOC_Os02g09510,LOC_Os02g11110,LOC_Os02g11680,LOC_Os02g14570,LOC_Os02g14680,LOC_Os02g17320,LOC_Os02g…	7279	433	32072	1.46531	0.116527	0.0148581	0.00191027
GOTERM_BP	GO:0035304	regulation of protein dephosphorylation	30	0.412145	0.000104145	LOC_Os01g05800,LOC_Os01g31680,LOC_Os01g31690,LOC_Os01g55570,LOC_Os01g72800,LOC_Os02g03250,LOC_Os02g15750,LOC_Os02g15900,LOC_Os02g16709,LOC_Os02g39740,LOC_Os02g50330,LOC_Os03g14040,LOC_Os03g17070,LOC_Os03g21560,LOC_Os03g29810,LOC_Os03g60910,LOC_Os04g16680,LOC_Os04g23890,LOC_Os04g45490,LOC_Os05g32390,LOC_Os05g33280,LOC_Os05g50900,LOC_Os07g30800,LOC_Os07g36250,LOC_Os07g37250,LOC_Os08g02630,LOC_Os08g…	7279	50	32072	2.64366	0.139554	0.0175073	0.00225087
GOTERM_BP	GO:0016117	carotenoid biosynthetic process	38	0.52205	0.00010947	LOC_Os01g39960,LOC_Os01g51360,LOC_Os01g66000,LOC_Os01g68450,LOC_Os02g02390,LOC_Os02g07160,LOC_Os02g38820,LOC_Os02g45660,LOC_Os02g53770,LOC_Os02g56040,LOC_Os02g58790,LOC_Os03g08570,LOC_Os03g22330,LOC_Os03g22780,LOC_Os03g62510,LOC_Os04g31040,LOC_Os04g57320,LOC_Os05g28200,LOC_Os05g29760,LOC_Os05g32680,LOC_Os05g33280,LOC_Os06g20320,LOC_Os06g45340,LOC_Os06g49160,LOC_Os06g51290,LOC_Os07g46410,LOC_Os08g…	7279	73	32072	2.29359	0.14669	0.0181105	0.00232842
GOTERM_CC	GO:0009295	nucleoid	23	0.315977	0.000120074	LOC_Os01g47330,LOC_Os01g50930,LOC_Os01g56350,LOC_Os01g57946,LOC_Os01g67000,LOC_Os01g67570,LOC_Os02g38210,LOC_Os02g51790,LOC_Os02g54360,LOC_Os02g55630,LOC_Os03g40550,LOC_Os03g60910,LOC_Os03g61030,LOC_Os04g16824,LOC_Os04g54500,LOC_Os05g49320,LOC_Os05g50980,LOC_Os06g05110,LOC_Os06g05350,LOC_Os07g28610,LOC_Os08g29110,LOC_Os10g32540,LOC_Os10g40130	7279	32	32072	3.16688	0.160899	0.0195543	0.00251404
GOTERM_BP	GO:0045893	positive regulation of transcription, DNA-templated	68	0.934194	0.000150134	LOC_Os01g05800,LOC_Os01g31680,LOC_Os01g42280,LOC_Os01g43070,LOC_Os01g53250,LOC_Os01g56350,LOC_Os01g62910,LOC_Os01g67570,LOC_Os01g70220,LOC_Os01g72800,LOC_Os01g73540,LOC_Os02g01440,LOC_Os02g03250,LOC_Os02g07230,LOC_Os02g15900,LOC_Os02g16709,LOC_Os02g39740,LOC_Os02g45660,LOC_Os02g45770,LOC_Os02g51790,LOC_Os02g53120,LOC_Os03g05680,LOC_Os03g14720,LOC_Os03g16470,LOC_Os03g22780,LOC_Os03g25130,LOC_Os03g…	7279	170	32072	1.76244	0.201179	0.0240734	0.00309506
GOTERM_BP	GO:0009653	anatomical structure morphogenesis	261	3.58566	0.00016862	LOC_Os01g04840,LOC_Os01g07110,LOC_Os01g07480,LOC_Os01g07500,LOC_Os01g08310,LOC_Os01g10320,LOC_Os01g14650,LOC_Os01g15480,LOC_Os01g16750,LOC_Os01g16770,LOC_Os01g21820,LOC_Os01g26310,LOC_Os01g33040,LOC_Os01g34560,LOC_Os01g38580,LOC_Os01g40200,LOC_Os01g45760,LOC_Os01g48200,LOC_Os01g48390,LOC_Os01g49200,LOC_Os01g50520,LOC_Os01g50530,LOC_Os01g50570,LOC_Os01g50580,LOC_Os01g51780,LOC_Os01g52050,LOC_Os01g…	7279	886	32072	1.29796	0.22595	0.0266279	0.00342349
GOTERM_MF	GO:0005506	iron ion binding	217	2.98118	0.000178919	LOC_Os01g08810,LOC_Os01g10040,LOC_Os01g11150,LOC_Os01g11270,LOC_Os01g11340,LOC_Os01g15830,LOC_Os01g18930,LOC_Os01g19020,LOC_Os01g22230,LOC_Os01g24810,LOC_Os01g24980,LOC_Os01g25820,LOC_Os01g28030,LOC_Os01g29150,LOC_Os01g37510,LOC_Os01g38110,LOC_Os01g43720,LOC_Os01g43750,LOC_Os01g43760,LOC_Os01g43851,LOC_Os01g45070,LOC_Os01g47340,LOC_Os01g48960,LOC_Os01g51550,LOC_Os01g53250,LOC_Os01g59000,LOC_Os01g…	7279	717	32072	1.33351	0.239752	0.0278327	0.00357838
GOTERM_MF	GO:0005488	binding	1091	14.9883	0.000186697	LOC_Os01g01030,LOC_Os01g01120,LOC_Os01g01650,LOC_Os01g02710,LOC_Os01g03100,LOC_Os01g03170,LOC_Os01g03190,LOC_Os01g03290,LOC_Os01g03620,LOC_Os01g03630,LOC_Os01g06660,LOC_Os01g08310,LOC_Os01g08340,LOC_Os01g08810,LOC_Os01g08820,LOC_Os01g09320,LOC_Os01g09850,LOC_Os01g11130,LOC_Os01g11230,LOC_Os01g11414,LOC_Os01g12520,LOC_Os01g12710,LOC_Os01g13420,LOC_Os01g13610,LOC_Os01g14010,LOC_Os01g14670,LOC_Os01g…	7279	4287	32072	1.12131	0.250174	0.0286156	0.00367903
GOTERM_BP	GO:0008219	cell death	124	1.70353	0.000208784	LOC_Os01g09800,LOC_Os01g16390,LOC_Os01g25820,LOC_Os01g36500,LOC_Os01g52450,LOC_Os01g54510,LOC_Os01g57370,LOC_Os01g69920,LOC_Os02g02790,LOC_Os02g03280,LOC_Os02g09630,LOC_Os02g09790,LOC_Os02g10350,LOC_Os02g18510,LOC_Os02g30190,LOC_Os02g34940,LOC_Os02g34970,LOC_Os02g35490,LOC_Os02g36380,LOC_Os02g38386,LOC_Os02g40130,LOC_Os02g57040,LOC_Os02g57305,LOC_Os03g03700,LOC_Os03g12820,LOC_Os03g14900,LOC_Os03g…	7279	370	32072	1.47664	0.27977	0.0315371	0.00405464
GOTERM_BP	GO:0019761	glucosinolate biosynthetic process	32	0.439621	0.000235757	LOC_Os01g11946,LOC_Os01g15490,LOC_Os01g43150,LOC_Os01g51360,LOC_Os01g68450,LOC_Os02g16709,LOC_Os02g39740,LOC_Os02g43360,LOC_Os02g50010,LOC_Os03g13930,LOC_Os03g17070,LOC_Os03g37290,LOC_Os03g55820,LOC_Os03g63420,LOC_Os04g16680,LOC_Os04g23890,LOC_Os04g38640,LOC_Os05g33280,LOC_Os05g34630,LOC_Os05g42350,LOC_Os06g01850,LOC_Os07g30670,LOC_Os07g30800,LOC_Os07g33240,LOC_Os08g44810,LOC_Os09g26810,LOC_Os09g…	7279	59	32072	2.38975	0.315914	0.0349417	0.00449237
GOTERM_BP	GO:0051726	regulation of cell cycle	42	0.577002	0.000238029	LOC_Os01g01170,LOC_Os01g07260,LOC_Os01g13260,LOC_Os01g17402,LOC_Os01g36390,LOC_Os01g54420,LOC_Os01g59120,LOC_Os01g64820,LOC_Os01g67100,LOC_Os01g70220,LOC_Os01g73460,LOC_Os02g10020,LOC_Os02g52460,LOC_Os02g55410,LOC_Os03g05300,LOC_Os03g11040,LOC_Os03g12414,LOC_Os03g39020,LOC_Os03g53580,LOC_Os03g59480,LOC_Os04g41110,LOC_Os04g42784,LOC_Os04g47580,LOC_Os05g14730,LOC_Os05g39850,LOC_Os05g41390,LOC_Os05g…	7279	89	32072	2.07928	0.318958	0.0349417	0.00449237
GOTERM_BP	GO:0010155	regulation of proton transport	22	0.302239	0.000270012	LOC_Os01g40710,LOC_Os01g72950,LOC_Os02g39740,LOC_Os02g45660,LOC_Os02g50010,LOC_Os03g03990,LOC_Os03g08570,LOC_Os03g54084,LOC_Os04g23890,LOC_Os05g33620,LOC_Os06g04150,LOC_Os06g21590,LOC_Os07g09800,LOC_Os08g01770,LOC_Os09g26810,LOC_Os10g38910,LOC_Os11g01140,LOC_Os11g31900,LOC_Os11g38030,LOC_Os11g40600,LOC_Os12g19530,LOC_Os12g42300	7279	32	32072	3.02919	0.361815	0.0390862	0.00502521
GOTERM_CC	GO:0009523	photosystem II	25	0.343454	0.000274711	LOC_Os01g31690,LOC_Os01g43070,LOC_Os01g56680,LOC_Os01g59090,LOC_Os01g71190,LOC_Os02g24632,LOC_Os02g24634,LOC_Os02g24642,LOC_Os02g42000,LOC_Os03g22370,LOC_Os04g35530,LOC_Os04g44190,LOC_Os04g44200,LOC_Os05g33300,LOC_Os05g43310,LOC_Os06g39708,LOC_Os07g01480,LOC_Os07g05360,LOC_Os07g37250,LOC_Os07g47640,LOC_Os08g02630,LOC_Os08g25900,LOC_Os10g32400,LOC_Os12g08830,LOC_Os12g37710	7279	40	32072	2.75381	0.368113	0.0392217	0.00504264
GOTERM_CC	GO:0016023	cytoplasmic membrane-bounded vesicle	1140	15.6615	0.000283612	LOC_Os01g01520,LOC_Os01g02139,LOC_Os01g02150,LOC_Os01g02400,LOC_Os01g02710,LOC_Os01g02760,LOC_Os01g03310,LOC_Os01g03320,LOC_Os01g03380,LOC_Os01g03620,LOC_Os01g03630,LOC_Os01g03680,LOC_Os01g03950,LOC_Os01g04070,LOC_Os01g04080,LOC_Os01g04350,LOC_Os01g04430,LOC_Os01g04440,LOC_Os01g04470,LOC_Os01g04480,LOC_Os01g04540,LOC_Os01g05870,LOC_Os01g06130,LOC_Os01g06140,LOC_Os01g06150,LOC_Os01g06240,LOC_Os01g…	7279	4509	32072	1.11398	0.38004	0.0398479	0.00512314
GOTERM_BP	GO:0016043	cellular component organization	402	5.52274	0.000286743	LOC_Os01g04840,LOC_Os01g05610,LOC_Os01g05800,LOC_Os01g05900,LOC_Os01g07170,LOC_Os01g07260,LOC_Os01g08310,LOC_Os01g09320,LOC_Os01g11040,LOC_Os01g13740,LOC_Os01g14650,LOC_Os01g15480,LOC_Os01g16770,LOC_Os01g16870,LOC_Os01g16910,LOC_Os01g20940,LOC_Os01g21820,LOC_Os01g24470,LOC_Os01g25600,LOC_Os01g26310,LOC_Os01g31680,LOC_Os01g31690,LOC_Os01g33040,LOC_Os01g34560,LOC_Os01g40200,LOC_Os01g49200,LOC_Os01g…	7279	1455	32072	1.21736	0.384236	0.0398479	0.00512314
GOTERM_BP	GO:0051567	histone H3-K9 methylation	39	0.535788	0.000298648	LOC_Os01g01170,LOC_Os01g07260,LOC_Os01g16870,LOC_Os01g36390,LOC_Os01g38970,LOC_Os01g54420,LOC_Os01g64820,LOC_Os01g70220,LOC_Os02g10490,LOC_Os02g53120,LOC_Os02g55410,LOC_Os03g02290,LOC_Os03g05020,LOC_Os03g39020,LOC_Os03g39740,LOC_Os03g43860,LOC_Os03g53580,LOC_Os03g53920,LOC_Os04g42784,LOC_Os05g39850,LOC_Os05g41750,LOC_Os06g16390,LOC_Os07g22400,LOC_Os07g32390,LOC_Os07g44360,LOC_Os08g02370,LOC_Os08g…	7279	81	32072	2.12146	0.400188	0.0408238	0.00524862
GOTERM_BP	GO:0008283	cell proliferation	38	0.52205	0.0003016	LOC_Os01g01170,LOC_Os01g07260,LOC_Os01g16650,LOC_Os01g33040,LOC_Os01g36390,LOC_Os01g54420,LOC_Os01g56350,LOC_Os01g64820,LOC_Os01g67100,LOC_Os01g70220,LOC_Os02g10020,LOC_Os02g50910,LOC_Os02g55410,LOC_Os03g12990,LOC_Os03g39020,LOC_Os03g43860,LOC_Os03g49210,LOC_Os03g52320,LOC_Os03g53580,LOC_Os04g30720,LOC_Os04g38620,LOC_Os05g39850,LOC_Os05g41750,LOC_Os07g22400,LOC_Os07g32390,LOC_Os07g44360,LOC_Os08g…	7279	78	32072	2.14656	0.404143	0.0408238	0.00524862
GOTERM_BP	GO:0006270	DNA replication initiation	29	0.398406	0.000342502	LOC_Os01g01170,LOC_Os01g07260,LOC_Os01g36390,LOC_Os01g54420,LOC_Os01g64820,LOC_Os01g67100,LOC_Os01g70220,LOC_Os02g10020,LOC_Os02g52460,LOC_Os02g55410,LOC_Os03g39020,LOC_Os03g53580,LOC_Os03g59480,LOC_Os05g14590,LOC_Os05g37980,LOC_Os05g39850,LOC_Os05g41750,LOC_Os07g22400,LOC_Os07g32390,LOC_Os07g44360,LOC_Os08g44420,LOC_Os09g06560,LOC_Os09g38710,LOC_Os11g03430,LOC_Os11g29380,LOC_Os11g35090,LOC_Os12g…	7279	52	32072	2.45725	0.458953	0.0457659	0.00588401
GOTERM_BP	GO:0009773	photosynthetic electron transport in photosystem I	22	0.302239	0.000365426	LOC_Os01g44210,LOC_Os02g03250,LOC_Os02g15750,LOC_Os02g51020,LOC_Os02g51470,LOC_Os03g06230,LOC_Os03g20100,LOC_Os03g53710,LOC_Os03g62780,LOC_Os04g16680,LOC_Os05g28090,LOC_Os05g33280,LOC_Os06g01850,LOC_Os06g22690,LOC_Os07g28610,LOC_Os07g30670,LOC_Os07g37250,LOC_Os08g29370,LOC_Os08g41460,LOC_Os09g10760,LOC_Os09g30340,LOC_Os11g40600	7279	33	32072	2.9374	0.489671	0.048211	0.00619837
GOTERM_MF	GO:0004601	peroxidase activity	69	0.947932	0.000449232	LOC_Os01g04120,LOC_Os01g10850,LOC_Os01g15830,LOC_Os01g18930,LOC_Os01g18970,LOC_Os01g19020,LOC_Os01g22230,LOC_Os01g25820,LOC_Os01g28030,LOC_Os01g51550,LOC_Os01g70310,LOC_Os01g73220,LOC_Os02g09940,LOC_Os02g14440,LOC_Os02g33450,LOC_Os02g34810,LOC_Os02g44500,LOC_Os03g13180,LOC_Os03g22010,LOC_Os03g22020,LOC_Os03g24870,LOC_Os03g25280,LOC_Os03g25300,LOC_Os03g25330,LOC_Os03g25340,LOC_Os03g29240,LOC_Os03g…	7279	182	32072	1.67044	0.601971	0.0585268	0.00752464
GOTERM_BP	GO:0007165	signal transduction	425	5.83871	0.000479922	LOC_Os01g02400,LOC_Os01g04070,LOC_Os01g05870,LOC_Os01g06836,LOC_Os01g07880,LOC_Os01g08310,LOC_Os01g09590,LOC_Os01g09800,LOC_Os01g12390,LOC_Os01g13740,LOC_Os01g13800,LOC_Os01g16240,LOC_Os01g17190,LOC_Os01g18800,LOC_Os01g20940,LOC_Os01g24470,LOC_Os01g28730,LOC_Os01g33090,LOC_Os01g35850,LOC_Os01g39820,LOC_Os01g42294,LOC_Os01g42960,LOC_Os01g43910,LOC_Os01g45860,LOC_Os01g47450,LOC_Os01g48200,LOC_Os01g…	7279	1560	32072	1.20038	0.643095	0.0617531	0.00793945
GOTERM_BP	GO:0007275	multicellular organismal development	432	5.93488	0.000513077	LOC_Os01g03170,LOC_Os01g03190,LOC_Os01g03290,LOC_Os01g03620,LOC_Os01g03630,LOC_Os01g04840,LOC_Os01g07110,LOC_Os01g07480,LOC_Os01g07500,LOC_Os01g07940,LOC_Os01g08310,LOC_Os01g08700,LOC_Os01g10040,LOC_Os01g10110,LOC_Os01g10320,LOC_Os01g10800,LOC_Os01g12660,LOC_Os01g15480,LOC_Os01g15640,LOC_Os01g21820,LOC_Os01g22900,LOC_Os01g23580,LOC_Os01g23740,LOC_Os01g24600,LOC_Os01g33040,LOC_Os01g34560,LOC_Os01g…	7279	1590	32072	1.19713	0.687524	0.0652142	0.00838443
GOTERM_BP	GO:0006979	response to oxidative stress	91	1.25017	0.000542438	LOC_Os01g01650,LOC_Os01g04120,LOC_Os01g10850,LOC_Os01g13610,LOC_Os01g15830,LOC_Os01g18930,LOC_Os01g18970,LOC_Os01g19020,LOC_Os01g22230,LOC_Os01g28030,LOC_Os01g51550,LOC_Os01g62900,LOC_Os01g70310,LOC_Os01g70400,LOC_Os01g73220,LOC_Os02g01010,LOC_Os02g01440,LOC_Os02g14440,LOC_Os02g17650,LOC_Os02g34810,LOC_Os02g44500,LOC_Os03g01090,LOC_Os03g13180,LOC_Os03g17560,LOC_Os03g22010,LOC_Os03g22020,LOC_Os03g…	7279	261	32072	1.53623	0.726866	0.0677646	0.00871233
GOTERM_MF	GO:0046872	metal ion binding	597	8.20168	0.000546146	LOC_Os01g01120,LOC_Os01g01920,LOC_Os01g03170,LOC_Os01g03190,LOC_Os01g03290,LOC_Os01g04120,LOC_Os01g08340,LOC_Os01g08810,LOC_Os01g08820,LOC_Os01g09320,LOC_Os01g09850,LOC_Os01g10040,LOC_Os01g10850,LOC_Os01g11270,LOC_Os01g11340,LOC_Os01g14010,LOC_Os01g14670,LOC_Os01g15830,LOC_Os01g16120,LOC_Os01g16240,LOC_Os01g17010,LOC_Os01g17160,LOC_Os01g18930,LOC_Os01g18970,LOC_Os01g19020,LOC_Os01g22230,LOC_Os01g…	7279	2266	32072	1.16083	0.731836	0.0677646	0.00871233
GOTERM_BP	GO:0006275	regulation of DNA replication	32	0.439621	0.000558388	LOC_Os01g01170,LOC_Os01g07260,LOC_Os01g36390,LOC_Os01g54420,LOC_Os01g64820,LOC_Os01g67100,LOC_Os01g70220,LOC_Os01g73460,LOC_Os02g10020,LOC_Os02g10490,LOC_Os02g52460,LOC_Os02g53120,LOC_Os02g55410,LOC_Os03g39020,LOC_Os03g39740,LOC_Os03g53580,LOC_Os03g59480,LOC_Os04g41110,LOC_Os04g42784,LOC_Os05g39850,LOC_Os05g41750,LOC_Os07g22400,LOC_Os07g32390,LOC_Os07g44360,LOC_Os08g16610,LOC_Os08g44420,LOC_Os09g…	7279	63	32072	2.23802	0.748239	0.0684684	0.00880282
GOTERM_BP	GO:0045036	protein targeting to chloroplast	19	0.261025	0.000634049	LOC_Os01g43070,LOC_Os01g54540,LOC_Os01g74190,LOC_Os02g04460,LOC_Os02g38240,LOC_Os02g54980,LOC_Os03g34040,LOC_Os03g40550,LOC_Os03g60910,LOC_Os05g05950,LOC_Os05g27100,LOC_Os05g32220,LOC_Os05g50980,LOC_Os07g06940,LOC_Os08g29110,LOC_Os08g42690,LOC_Os09g10760,LOC_Os09g32030,LOC_Os10g32540	7279	27	32072	3.10059	0.849626	0.0768419	0.00987937
GOTERM_BP	GO:0009628	response to abiotic stimulus	578	7.94065	0.00067281	LOC_Os01g03620,LOC_Os01g03630,LOC_Os01g03750,LOC_Os01g04350,LOC_Os01g04380,LOC_Os01g04870,LOC_Os01g06560,LOC_Os01g07430,LOC_Os01g07500,LOC_Os01g07530,LOC_Os01g07590,LOC_Os01g07880,LOC_Os01g08700,LOC_Os01g08860,LOC_Os01g09590,LOC_Os01g09800,LOC_Os01g12520,LOC_Os01g13770,LOC_Os01g14650,LOC_Os01g16120,LOC_Os01g16240,LOC_Os01g17190,LOC_Os01g17402,LOC_Os01g18120,LOC_Os01g18800,LOC_Os01g20160,LOC_Os01g…	7279	2194	32072	1.16077	0.901566	0.0806022	0.0103628
GOTERM_MF	GO:0043565	sequence-specific DNA binding	144	1.97829	0.000681557	LOC_Os01g06560,LOC_Os01g07880,LOC_Os01g08710,LOC_Os01g10320,LOC_Os01g11350,LOC_Os01g14440,LOC_Os01g15250,LOC_Os01g43650,LOC_Os01g45570,LOC_Os01g46800,LOC_Os01g46970,LOC_Os01g52680,LOC_Os01g53260,LOC_Os01g54600,LOC_Os01g59350,LOC_Os01g60490,LOC_Os01g60520,LOC_Os01g61810,LOC_Os01g62514,LOC_Os01g70890,LOC_Os02g03580,LOC_Os02g05640,LOC_Os02g07430,LOC_Os02g07450,LOC_Os02g07840,LOC_Os02g09830,LOC_Os02g…	7279	459	32072	1.38231	0.913287	0.0807222	0.0103783
GOTERM_MF	GO:0005215	transporter activity	426	5.85245	0.000713095	LOC_Os01g01360,LOC_Os01g03144,LOC_Os01g03914,LOC_Os01g04190,LOC_Os01g05800,LOC_Os01g07730,LOC_Os01g11260,LOC_Os01g11946,LOC_Os01g12520,LOC_Os01g13120,LOC_Os01g13660,LOC_Os01g13770,LOC_Os01g14950,LOC_Os01g15010,LOC_Os01g16910,LOC_Os01g17010,LOC_Os01g20160,LOC_Os01g21820,LOC_Os01g23580,LOC_Os01g24010,LOC_Os01g28690,LOC_Os01g28980,LOC_Os01g31680,LOC_Os01g34850,LOC_Os01g36070,LOC_Os01g38510,LOC_Os01g…	7279	1574	32072	1.1925	0.955547	0.0830041	0.0106716
GOTERM_BP	GO:0005975	carbohydrate metabolic process	324	4.45116	0.000716751	LOC_Os01g03710,LOC_Os01g03950,LOC_Os01g04480,LOC_Os01g04550,LOC_Os01g07530,LOC_Os01g09570,LOC_Os01g11260,LOC_Os01g16310,LOC_Os01g19220,LOC_Os01g19740,LOC_Os01g21320,LOC_Os01g22780,LOC_Os01g26310,LOC_Os01g34880,LOC_Os01g34890,LOC_Os01g34900,LOC_Os01g34920,LOC_Os01g34930,LOC_Os01g39270,LOC_Os01g42730,LOC_Os01g43160,LOC_Os01g43220,LOC_Os01g47400,LOC_Os01g48200,LOC_Os01g51754,LOC_Os01g52250,LOC_Os01g…	7279	1163	32072	1.22749	0.960447	0.0830041	0.0106716
GOTERM_BP	GO:0009657	plastid organization	25	0.343454	0.000768411	LOC_Os01g44210,LOC_Os01g55570,LOC_Os01g56680,LOC_Os02g01440,LOC_Os02g15750,LOC_Os03g14040,LOC_Os03g17070,LOC_Os03g21560,LOC_Os03g55720,LOC_Os04g16680,LOC_Os04g57320,LOC_Os05g33280,LOC_Os05g34630,LOC_Os06g01850,LOC_Os06g22690,LOC_Os07g11110,LOC_Os07g36250,LOC_Os07g37250,LOC_Os08g02630,LOC_Os08g29110,LOC_Os08g29370,LOC_Os08g44810,LOC_Os11g31900,LOC_Os11g40600,LOC_Os12g08730	7279	44	32072	2.50347	1	0.0880087	0.0113151
GOTERM_MF	GO:0005515	protein binding	1380	18.9586	0.000895836	LOC_Os01g02250,LOC_Os01g02270,LOC_Os01g03170,LOC_Os01g03190,LOC_Os01g03290,LOC_Os01g04070,LOC_Os01g04840,LOC_Os01g04870,LOC_Os01g05610,LOC_Os01g05620,LOC_Os01g05800,LOC_Os01g05870,LOC_Os01g05900,LOC_Os01g06454,LOC_Os01g06500,LOC_Os01g07110,LOC_Os01g07630,LOC_Os01g07880,LOC_Os01g08340,LOC_Os01g08680,LOC_Os01g08700,LOC_Os01g08820,LOC_Os01g09320,LOC_Os01g09470,LOC_Os01g09570,LOC_Os01g09590,LOC_Os01g…	7279	5575	32072	1.09066	1	0.101488	0.013048
GOTERM_BP	GO:0030154	cell differentiation	179	2.45913	0.00092188	LOC_Os01g04840,LOC_Os01g05710,LOC_Os01g07500,LOC_Os01g08310,LOC_Os01g08700,LOC_Os01g12660,LOC_Os01g21820,LOC_Os01g40200,LOC_Os01g42280,LOC_Os01g44069,LOC_Os01g48060,LOC_Os01g48390,LOC_Os01g51780,LOC_Os01g52050,LOC_Os01g52680,LOC_Os01g55510,LOC_Os01g55750,LOC_Os01g59090,LOC_Os01g64630,LOC_Os01g67100,LOC_Os01g68870,LOC_Os01g73310,LOC_Os01g73540,LOC_Os02g01440,LOC_Os02g03020,LOC_Os02g07230,LOC_Os02g…	7279	597	32072	1.32109	1	0.103315	0.013283
GOTERM_BP	GO:0016226	iron-sulfur cluster assembly	31	0.425883	0.00102071	LOC_Os01g47340,LOC_Os02g01440,LOC_Os02g02520,LOC_Os02g02770,LOC_Os02g18940,LOC_Os02g39740,LOC_Os02g41470,LOC_Os02g50010,LOC_Os02g53770,LOC_Os03g20010,LOC_Os03g29810,LOC_Os03g45400,LOC_Os03g52640,LOC_Os04g35180,LOC_Os04g45490,LOC_Os05g32220,LOC_Os05g32390,LOC_Os05g49410,LOC_Os06g04610,LOC_Os07g06450,LOC_Os07g06940,LOC_Os07g38300,LOC_Os08g07060,LOC_Os08g28230,LOC_Os09g09790,LOC_Os09g24530,LOC_Os09g…	7279	63	32072	2.16808	1	0.113174	0.0145505
GOTERM_BP	GO:0046777	protein autophosphorylation	27	0.37093	0.00125799	LOC_Os01g13800,LOC_Os01g72950,LOC_Os01g74200,LOC_Os02g30900,LOC_Os02g36380,LOC_Os02g39740,LOC_Os02g50010,LOC_Os03g03990,LOC_Os03g08570,LOC_Os03g35600,LOC_Os03g54084,LOC_Os04g23890,LOC_Os05g33620,LOC_Os06g03682,LOC_Os06g04150,LOC_Os07g09800,LOC_Os07g37040,LOC_Os07g48420,LOC_Os08g01770,LOC_Os08g28870,LOC_Os09g15700,LOC_Os10g15300,LOC_Os10g38910,LOC_Os11g38030,LOC_Os12g19530,LOC_Os12g20150,LOC_Os12g…	7279	52	32072	2.28778	1	0.138015	0.0177443
GOTERM_MF	GO:0017111	nucleoside-triphosphatase activity	164	2.25306	0.00132046	LOC_Os01g02250,LOC_Os01g03144,LOC_Os01g04840,LOC_Os01g11946,LOC_Os01g12660,LOC_Os01g19260,LOC_Os01g21240,LOC_Os01g24010,LOC_Os01g25240,LOC_Os01g25720,LOC_Os01g36390,LOC_Os01g42030,LOC_Os01g43150,LOC_Os01g45450,LOC_Os01g50160,LOC_Os01g52280,LOC_Os01g52550,LOC_Os01g53070,LOC_Os01g55260,LOC_Os01g56400,LOC_Os01g62500,LOC_Os01g68330,LOC_Os01g71690,LOC_Os01g72680,LOC_Os01g72800,LOC_Os02g04530,LOC_Os02g…	7279	545	32072	1.32587	1	0.14336	0.0184314
GOTERM_MF	GO:0020037	heme binding	160	2.1981	0.00135244	LOC_Os01g04120,LOC_Os01g08810,LOC_Os01g10040,LOC_Os01g10850,LOC_Os01g11270,LOC_Os01g11340,LOC_Os01g15830,LOC_Os01g18930,LOC_Os01g18970,LOC_Os01g19020,LOC_Os01g22230,LOC_Os01g24810,LOC_Os01g28030,LOC_Os01g29150,LOC_Os01g38110,LOC_Os01g43720,LOC_Os01g43750,LOC_Os01g43760,LOC_Os01g43851,LOC_Os01g51550,LOC_Os01g59000,LOC_Os01g66180,LOC_Os01g67720,LOC_Os01g70310,LOC_Os01g72760,LOC_Os01g73220,LOC_Os02g…	7279	530	32072	1.33014	1	0.145319	0.0186833
GOTERM_BP	GO:0006399	tRNA metabolic process	18	0.247287	0.00140577	LOC_Os01g06020,LOC_Os01g31110,LOC_Os01g53150,LOC_Os01g62440,LOC_Os01g74190,LOC_Os02g01440,LOC_Os02g38240,LOC_Os02g41470,LOC_Os03g40550,LOC_Os03g52640,LOC_Os03g60910,LOC_Os05g50980,LOC_Os07g06940,LOC_Os08g29110,LOC_Os09g30466,LOC_Os10g40130,LOC_Os11g39670,LOC_Os11g41910	7279	27	32072	2.9374	1	0.149507	0.0192217
GOTERM_BP	GO:0009073	aromatic amino acid family biosynthetic process	26	0.357192	0.00154505	LOC_Os01g55870,LOC_Os02g02390,LOC_Os02g02520,LOC_Os02g02770,LOC_Os02g07230,LOC_Os02g18940,LOC_Os02g39740,LOC_Os02g45660,LOC_Os02g50010,LOC_Os03g22780,LOC_Os03g29810,LOC_Os03g45400,LOC_Os04g54800,LOC_Os05g28200,LOC_Os05g32220,LOC_Os05g49410,LOC_Os06g12150,LOC_Os07g38300,LOC_Os08g07060,LOC_Os08g34290,LOC_Os09g09790,LOC_Os09g24530,LOC_Os09g30410,LOC_Os09g32030,LOC_Os10g42700,LOC_Os11g38030	7279	50	32072	2.29117	1	0.16266	0.0209128
GOTERM_BP	GO:0006091	generation of precursor metabolites and energy	106	1.45624	0.00173726	LOC_Os01g09570,LOC_Os01g22780,LOC_Os01g25600,LOC_Os01g31690,LOC_Os01g37130,LOC_Os01g39960,LOC_Os01g42730,LOC_Os01g58470,LOC_Os01g59930,LOC_Os01g64120,LOC_Os01g72800,LOC_Os02g02520,LOC_Os02g03250,LOC_Os02g07260,LOC_Os02g07490,LOC_Os02g08110,LOC_Os02g10070,LOC_Os02g14770,LOC_Os02g15750,LOC_Os02g24632,LOC_Os02g24634,LOC_Os02g33730,LOC_Os02g42000,LOC_Os02g47360,LOC_Os02g48360,LOC_Os02g51020,LOC_Os02g…	7279	329	32072	1.41959	1	0.180802	0.0232453
GOTERM_BP	GO:0009607	response to biotic stimulus	302	4.14892	0.00175207	LOC_Os01g02400,LOC_Os01g06500,LOC_Os01g09800,LOC_Os01g12720,LOC_Os01g16870,LOC_Os01g18930,LOC_Os01g24600,LOC_Os01g25820,LOC_Os01g28500,LOC_Os01g36500,LOC_Os01g39820,LOC_Os01g42780,LOC_Os01g45274,LOC_Os01g46800,LOC_Os01g47330,LOC_Os01g48200,LOC_Os01g49200,LOC_Os01g55870,LOC_Os01g56200,LOC_Os01g56330,LOC_Os01g58730,LOC_Os01g59350,LOC_Os01g60520,LOC_Os01g61550,LOC_Os01g66000,LOC_Os01g69920,LOC_Os01g…	7279	1095	32072	1.2152	1	0.180802	0.0232453
GOTERM_CC	GO:0005618	cell wall	312	4.2863	0.00188935	LOC_Os01g03620,LOC_Os01g03630,LOC_Os01g03950,LOC_Os01g09320,LOC_Os01g10850,LOC_Os01g11760,LOC_Os01g14650,LOC_Os01g14670,LOC_Os01g14950,LOC_Os01g15830,LOC_Os01g16310,LOC_Os01g16770,LOC_Os01g18930,LOC_Os01g19220,LOC_Os01g19440,LOC_Os01g23740,LOC_Os01g28500,LOC_Os01g33090,LOC_Os01g36229,LOC_Os01g37510,LOC_Os01g39820,LOC_Os01g42520,LOC_Os01g44340,LOC_Os01g46080,LOC_Os01g46090,LOC_Os01g50680,LOC_Os01g…	7279	1137	32072	1.20906	1	0.193057	0.0248209
GOTERM_BP	GO:0006810	transport	665	9.13587	0.00237284	LOC_Os01g01360,LOC_Os01g03144,LOC_Os01g03914,LOC_Os01g04190,LOC_Os01g04840,LOC_Os01g05800,LOC_Os01g07730,LOC_Os01g11260,LOC_Os01g11414,LOC_Os01g11946,LOC_Os01g11980,LOC_Os01g12020,LOC_Os01g12520,LOC_Os01g13120,LOC_Os01g13660,LOC_Os01g13770,LOC_Os01g14950,LOC_Os01g15010,LOC_Os01g16910,LOC_Os01g17010,LOC_Os01g20160,LOC_Os01g21820,LOC_Os01g23580,LOC_Os01g24010,LOC_Os01g28690,LOC_Os01g28980,LOC_Os01g…	7279	2596	32072	1.12868	1	0.240107	0.03087
GOTERM_BP	GO:0043085	positive regulation of catalytic activity	28	0.384668	0.00329075	LOC_Os01g55570,LOC_Os01g59080,LOC_Os01g64270,LOC_Os01g66000,LOC_Os01g73540,LOC_Os03g17070,LOC_Os03g47610,LOC_Os04g16680,LOC_Os04g23890,LOC_Os04g36640,LOC_Os04g45490,LOC_Os05g29760,LOC_Os05g34630,LOC_Os05g41190,LOC_Os05g45030,LOC_Os05g49130,LOC_Os06g05390,LOC_Os06g49160,LOC_Os07g01480,LOC_Os07g31270,LOC_Os07g46410,LOC_Os08g29160,LOC_Os08g40930,LOC_Os08g44810,LOC_Os09g07570,LOC_Os09g09790,LOC_Os10g…	7279	60	32072	2.05618	1	0.329789	0.0424001
GOTERM_CC	GO:0009654	photosystem II oxygen evolving complex	15	0.206072	0.00337827	LOC_Os01g31690,LOC_Os01g43070,LOC_Os01g59090,LOC_Os01g71190,LOC_Os02g42000,LOC_Os04g35530,LOC_Os04g44190,LOC_Os04g44200,LOC_Os05g33300,LOC_Os07g01480,LOC_Os07g05360,LOC_Os08g25900,LOC_Os10g32400,LOC_Os12g08830,LOC_Os12g37710	7279	22	32072	3.00416	1	0.335335	0.0431131
GOTERM_MF	GO:0019825	oxygen binding	109	1.49746	0.00387674	LOC_Os01g10040,LOC_Os01g11270,LOC_Os01g11340,LOC_Os01g24810,LOC_Os01g29150,LOC_Os01g38110,LOC_Os01g43720,LOC_Os01g43750,LOC_Os01g43760,LOC_Os01g43851,LOC_Os01g50520,LOC_Os01g50530,LOC_Os01g50570,LOC_Os01g50580,LOC_Os01g58970,LOC_Os01g59000,LOC_Os01g72760,LOC_Os02g06290,LOC_Os02g07680,LOC_Os02g09250,LOC_Os02g09410,LOC_Os02g12540,LOC_Os02g17760,LOC_Os02g29960,LOC_Os02g30080,LOC_Os02g32770,LOC_Os02g…	7279	351	32072	1.36828	1	0.381184	0.0490078
Region 4
Type	Term	Description	Count	%	PValue	Genes	ListTotal	PopHits	PopTotal	FoldChange	Bonferroni	Benjamini	FDR
GOTERM_BP	GO:0008152	metabolic process	434	36.5936	8.76e-20	LOC_Os01g02880,LOC_Os01g04300,LOC_Os01g04950,LOC_Os01g06450,LOC_Os01g10250,LOC_Os01g14580,LOC_Os01g14926,LOC_Os01g17050,LOC_Os01g19750,LOC_Os01g26390,LOC_Os01g27230,LOC_Os01g31760,LOC_Os01g36240,LOC_Os01g36550,LOC_Os01g41810,LOC_Os01g41820,LOC_Os01g43350,LOC_Os01g43480,LOC_Os01g43710,LOC_Os01g43774,LOC_Os01g44050,LOC_Os01g44950,LOC_Os01g44970,LOC_Os01g46030,LOC_Os01g47080,LOC_Os01g48420,LOC_Os01g…	1186	7849	32072	1.49526	3.31e-17	2.16e-16	3.31e-17
GOTERM_BP	GO:0009987	cellular process	364	30.6914	7.51e-10	LOC_Os01g02080,LOC_Os01g02190,LOC_Os01g06450,LOC_Os01g07870,LOC_Os01g08260,LOC_Os01g10130,LOC_Os01g10580,LOC_Os01g10600,LOC_Os01g11160,LOC_Os01g12440,LOC_Os01g14580,LOC_Os01g14926,LOC_Os01g17050,LOC_Os01g25386,LOC_Os01g26390,LOC_Os01g27160,LOC_Os01g31760,LOC_Os01g34970,LOC_Os01g36550,LOC_Os01g43350,LOC_Os01g44050,LOC_Os01g44950,LOC_Os01g46030,LOC_Os01g47080,LOC_Os01g48130,LOC_Os01g48910,LOC_Os01g…	1186	7318	32072	1.34509	2.84e-07	9.25e-07	1.42e-07
GOTERM_MF	GO:0003824	catalytic activity	239	20.1518	1.54e-09	LOC_Os01g02080,LOC_Os01g02880,LOC_Os01g04300,LOC_Os01g14580,LOC_Os01g19750,LOC_Os01g27230,LOC_Os01g36240,LOC_Os01g41810,LOC_Os01g41820,LOC_Os01g43710,LOC_Os01g43774,LOC_Os01g44950,LOC_Os01g47080,LOC_Os01g48420,LOC_Os01g48910,LOC_Os01g49630,LOC_Os01g49820,LOC_Os01g50490,LOC_Os01g50590,LOC_Os01g56310,LOC_Os01g56870,LOC_Os01g58740,LOC_Os01g59920,LOC_Os01g60450,LOC_Os01g61230,LOC_Os01g62420,LOC_Os01g…	1186	4383	32072	1.47458	5.82e-07	1.26e-06	1.94e-07
GOTERM_CC	GO:0005623	cell	162	13.6594	4.11e-09	LOC_Os01g03730,LOC_Os01g06920,LOC_Os01g14926,LOC_Os01g19750,LOC_Os01g36240,LOC_Os01g36550,LOC_Os01g41810,LOC_Os01g41820,LOC_Os01g43480,LOC_Os01g43710,LOC_Os01g43774,LOC_Os01g46030,LOC_Os01g49614,LOC_Os01g50590,LOC_Os01g53240,LOC_Os01g57710,LOC_Os01g58640,LOC_Os01g58650,LOC_Os01g58660,LOC_Os01g59550,LOC_Os01g62060,LOC_Os01g63970,LOC_Os01g64100,LOC_Os01g64850,LOC_Os01g66640,LOC_Os01g72520,LOC_Os02g…	1186	2702	32072	1.62133	1.55e-06	2.53e-06	3.88e-07
GOTERM_MF	GO:0005488	binding	228	19.2243	3.09e-08	LOC_Os01g07640,LOC_Os01g10580,LOC_Os01g12930,LOC_Os01g14410,LOC_Os01g14580,LOC_Os01g19750,LOC_Os01g36240,LOC_Os01g41810,LOC_Os01g41820,LOC_Os01g43710,LOC_Os01g43774,LOC_Os01g50490,LOC_Os01g50590,LOC_Os01g50900,LOC_Os01g52030,LOC_Os01g53130,LOC_Os01g56310,LOC_Os01g57470,LOC_Os01g58640,LOC_Os01g58740,LOC_Os01g59450,LOC_Os01g61230,LOC_Os01g62420,LOC_Os01g63210,LOC_Os01g63980,LOC_Os01g64100,LOC_Os01g…	1186	4287	32072	1.43821	1.17e-05	1.52e-05	2.34e-06
GOTERM_MF	GO:0016491	oxidoreductase activity	97	8.17875	6.83e-08	LOC_Os01g14580,LOC_Os01g27230,LOC_Os01g36240,LOC_Os01g41810,LOC_Os01g43710,LOC_Os01g43774,LOC_Os01g48420,LOC_Os01g50490,LOC_Os01g58740,LOC_Os01g59920,LOC_Os01g60450,LOC_Os01g61230,LOC_Os01g65830,LOC_Os01g66100,LOC_Os01g73170,LOC_Os01g74000,LOC_Os01g74660,LOC_Os02g11020,LOC_Os02g35500,LOC_Os02g41954,LOC_Os02g42790,LOC_Os02g47350,LOC_Os02g53180,LOC_Os02g54890,LOC_Os02g56460,LOC_Os02g57290,LOC_Os03g…	1186	1438	32072	1.82412	2.58e-05	2.49e-05	3.82e-06
GOTERM_BP	GO:0009058	biosynthetic process	244	20.5734	7.07e-08	LOC_Os01g06450,LOC_Os01g07376,LOC_Os01g08190,LOC_Os01g09450,LOC_Os01g10440,LOC_Os01g10580,LOC_Os01g12440,LOC_Os01g17000,LOC_Os01g21120,LOC_Os01g31760,LOC_Os01g32770,LOC_Os01g36460,LOC_Os01g38610,LOC_Os01g44050,LOC_Os01g47080,LOC_Os01g48130,LOC_Os01g48446,LOC_Os01g48910,LOC_Os01g49830,LOC_Os01g50050,LOC_Os01g50590,LOC_Os01g50940,LOC_Os01g56310,LOC_Os01g59920,LOC_Os01g60450,LOC_Os01g61230,LOC_Os01g…	1186	4709	32072	1.40121	2.67e-05	2.49e-05	3.82e-06
GOTERM_MF	GO:0003700	sequence-specific DNA binding transcription factor activity	116	9.78078	2.33e-07	LOC_Os01g09450,LOC_Os01g10580,LOC_Os01g12440,LOC_Os01g17000,LOC_Os01g21120,LOC_Os01g38610,LOC_Os01g48130,LOC_Os01g48446,LOC_Os01g49830,LOC_Os01g50940,LOC_Os01g62920,LOC_Os01g63980,LOC_Os01g64360,LOC_Os01g67650,LOC_Os02g01940,LOC_Os02g04340,LOC_Os02g05610,LOC_Os02g08440,LOC_Os02g12790,LOC_Os02g31890,LOC_Os02g42870,LOC_Os02g43820,LOC_Os02g44930,LOC_Os02g56140,LOC_Os02g57550,LOC_Os02g58670,LOC_Os03g…	1186	1877	32072	1.67123	8.82e-05	7.18e-05	1.1e-05
GOTERM_BP	GO:0055114	oxidation-reduction process	99	8.34739	3.2e-07	LOC_Os01g07376,LOC_Os01g14580,LOC_Os01g27230,LOC_Os01g36240,LOC_Os01g41810,LOC_Os01g41820,LOC_Os01g43710,LOC_Os01g43774,LOC_Os01g44050,LOC_Os01g48420,LOC_Os01g50490,LOC_Os01g58740,LOC_Os01g60450,LOC_Os01g65830,LOC_Os01g66100,LOC_Os01g73170,LOC_Os01g74000,LOC_Os02g11020,LOC_Os02g35500,LOC_Os02g41954,LOC_Os02g42790,LOC_Os02g45530,LOC_Os02g47350,LOC_Os02g53180,LOC_Os02g57290,LOC_Os03g01770,LOC_Os03g…	1186	1532	32072	1.7475	0.000120814	8.74e-05	1.34e-05
GOTERM_BP	GO:0006629	lipid metabolic process	72	6.07083	1.4e-06	LOC_Os01g27230,LOC_Os01g31760,LOC_Os01g47080,LOC_Os01g48910,LOC_Os01g50050,LOC_Os01g50590,LOC_Os01g56310,LOC_Os01g65830,LOC_Os01g66100,LOC_Os01g70380,LOC_Os01g72520,LOC_Os02g01760,LOC_Os02g11020,LOC_Os02g41954,LOC_Os02g43700,LOC_Os02g44850,LOC_Os02g48770,LOC_Os02g56300,LOC_Os02g57290,LOC_Os03g18590,LOC_Os03g29150,LOC_Os03g30130,LOC_Os03g44300,LOC_Os03g46910,LOC_Os03g52170,LOC_Os03g52570,LOC_Os03g…	1186	1033	32072	1.88484	0.000530264	0.000345384	5.3e-05
GOTERM_CC	GO:0005886	plasma membrane	196	16.5261	3.25e-06	LOC_Os01g04720,LOC_Os01g04950,LOC_Os01g07376,LOC_Os01g07870,LOC_Os01g08260,LOC_Os01g10600,LOC_Os01g11160,LOC_Os01g12650,LOC_Os01g14580,LOC_Os01g14926,LOC_Os01g25386,LOC_Os01g26120,LOC_Os01g26390,LOC_Os01g34970,LOC_Os01g47730,LOC_Os01g48420,LOC_Os01g48910,LOC_Os01g49614,LOC_Os01g49820,LOC_Os01g50490,LOC_Os01g51770,LOC_Os01g52560,LOC_Os01g54590,LOC_Os01g55270,LOC_Os01g55610,LOC_Os01g60450,LOC_Os01g…	1186	3811	32072	1.39078	0.00122914	0.000727808	0.00011174
GOTERM_CC	GO:0048046	apoplast	33	2.78246	4.78e-06	LOC_Os01g07870,LOC_Os01g14580,LOC_Os01g50900,LOC_Os01g62420,LOC_Os01g65460,LOC_Os01g67860,LOC_Os02g01280,LOC_Os02g17900,LOC_Os02g29000,LOC_Os02g29020,LOC_Os02g33110,LOC_Os02g39330,LOC_Os02g46910,LOC_Os02g53860,LOC_Os02g55420,LOC_Os03g06940,LOC_Os03g08150,LOC_Os03g13200,LOC_Os03g15020,LOC_Os04g33740,LOC_Os05g09440,LOC_Os05g19670,LOC_Os05g35360,LOC_Os05g49880,LOC_Os06g45710,LOC_Os08g33720,LOC_Os08g…	1186	340	32072	2.62468	0.00180639	0.000980485	0.000150533
GOTERM_MF	GO:0004022	alcohol dehydrogenase (NAD) activity	12	1.0118	5.49e-06	LOC_Os03g18740,LOC_Os04g30760,LOC_Os04g52400,LOC_Os07g37420,LOC_Os07g40250,LOC_Os07g46910,LOC_Os09g04730,LOC_Os09g28570,LOC_Os11g10520,LOC_Os11g25160,LOC_Os11g25700,LOC_Os11g43200	1186	47	32072	6.90438	0.0020767	0.00104049	0.000159746
GOTERM_CC	GO:0016023	cytoplasmic membrane-bounded vesicle	223	18.8027	7.62e-06	LOC_Os01g01180,LOC_Os01g02190,LOC_Os01g03740,LOC_Os01g04300,LOC_Os01g04720,LOC_Os01g12650,LOC_Os01g16980,LOC_Os01g19750,LOC_Os01g25386,LOC_Os01g25540,LOC_Os01g34970,LOC_Os01g36240,LOC_Os01g41750,LOC_Os01g43710,LOC_Os01g49614,LOC_Os01g49630,LOC_Os01g50590,LOC_Os01g50900,LOC_Os01g52750,LOC_Os01g57390,LOC_Os01g57400,LOC_Os01g58660,LOC_Os01g64100,LOC_Os01g64850,LOC_Os01g65460,LOC_Os01g66640,LOC_Os01g…	1186	4509	32072	1.33741	0.00288016	0.00133998	0.000205726
GOTERM_MF	GO:0016787	hydrolase activity	164	13.828	9.82e-06	LOC_Os01g04300,LOC_Os01g07870,LOC_Os01g08260,LOC_Os01g10250,LOC_Os01g19750,LOC_Os01g25386,LOC_Os01g31760,LOC_Os01g34970,LOC_Os01g43480,LOC_Os01g44970,LOC_Os01g49630,LOC_Os01g49820,LOC_Os01g50622,LOC_Os01g52560,LOC_Os01g52750,LOC_Os01g58270,LOC_Os01g58640,LOC_Os01g59450,LOC_Os01g61400,LOC_Os01g64100,LOC_Os01g64850,LOC_Os01g65460,LOC_Os01g66700,LOC_Os01g70850,LOC_Os01g71094,LOC_Os01g72520,LOC_Os02g…	1186	3131	32072	1.41645	0.00371137	0.00148944	0.000228672
GOTERM_CC	GO:0016021	integral component of membrane	128	10.7926	1.08e-05	LOC_Os01g02190,LOC_Os01g03940,LOC_Os01g04950,LOC_Os01g06450,LOC_Os01g07870,LOC_Os01g08260,LOC_Os01g10600,LOC_Os01g11160,LOC_Os01g12650,LOC_Os01g25386,LOC_Os01g26120,LOC_Os01g34970,LOC_Os01g51040,LOC_Os01g51770,LOC_Os01g52560,LOC_Os01g57710,LOC_Os01g61960,LOC_Os01g65000,LOC_Os01g65380,LOC_Os01g65670,LOC_Os01g70380,LOC_Os02g11020,LOC_Os02g12750,LOC_Os02g13270,LOC_Os02g24598,LOC_Os02g41860,LOC_Os02g…	1186	2313	32072	1.4965	0.0040859	0.00148944	0.000228672
GOTERM_BP	GO:0009239	enterobactin biosynthetic process	14	1.18044	1.09e-05	LOC_Os02g42790,LOC_Os02g47350,LOC_Os03g18740,LOC_Os04g30760,LOC_Os04g52400,LOC_Os07g37420,LOC_Os07g40250,LOC_Os07g46910,LOC_Os07g48640,LOC_Os09g04730,LOC_Os09g28570,LOC_Os11g25160,LOC_Os11g25700,LOC_Os11g43200	1186	73	32072	5.18617	0.0041161	0.00148944	0.000228672
GOTERM_MF	GO:0008667	2,3-dihydro-2,3-dihydroxybenzoate dehydrogenase activity	14	1.18044	1.09e-05	LOC_Os02g42790,LOC_Os02g47350,LOC_Os03g18740,LOC_Os04g30760,LOC_Os04g52400,LOC_Os07g37420,LOC_Os07g40250,LOC_Os07g46910,LOC_Os07g48640,LOC_Os09g04730,LOC_Os09g28570,LOC_Os11g25160,LOC_Os11g25700,LOC_Os11g43200	1186	73	32072	5.18617	0.0041161	0.00148944	0.000228672
GOTERM_BP	GO:0006950	response to stress	188	15.8516	1.56e-05	LOC_Os01g02880,LOC_Os01g06520,LOC_Os01g06920,LOC_Os01g14410,LOC_Os01g14580,LOC_Os01g17050,LOC_Os01g19750,LOC_Os01g21120,LOC_Os01g25386,LOC_Os01g27230,LOC_Os01g36240,LOC_Os01g41750,LOC_Os01g48446,LOC_Os01g50622,LOC_Os01g50940,LOC_Os01g52270,LOC_Os01g53240,LOC_Os01g58740,LOC_Os01g60450,LOC_Os01g62290,LOC_Os01g62420,LOC_Os01g64100,LOC_Os01g64470,LOC_Os01g64480,LOC_Os01g67650,LOC_Os01g67860,LOC_Os01g…	1186	3723	32072	1.36555	0.00588888	0.00201878	0.000309941
GOTERM_MF	GO:0005215	transporter activity	93	7.84148	2.24e-05	LOC_Os01g02190,LOC_Os01g04950,LOC_Os01g07870,LOC_Os01g08260,LOC_Os01g10600,LOC_Os01g11160,LOC_Os01g25386,LOC_Os01g31760,LOC_Os01g34970,LOC_Os01g51770,LOC_Os01g52560,LOC_Os01g55610,LOC_Os01g61400,LOC_Os01g63870,LOC_Os01g64850,LOC_Os01g65000,LOC_Os01g65130,LOC_Os01g65380,LOC_Os01g65670,LOC_Os02g39910,LOC_Os02g41860,LOC_Os02g45380,LOC_Os02g58530,LOC_Os03g01290,LOC_Os03g03790,LOC_Os03g04480,LOC_Os03g…	1186	1574	32072	1.59779	0.00848233	0.00276245	0.000424116
GOTERM_BP	GO:0006633	fatty acid biosynthetic process	19	1.60202	2.65e-05	LOC_Os01g27230,LOC_Os01g31760,LOC_Os01g47080,LOC_Os01g65830,LOC_Os03g18590,LOC_Os03g63930,LOC_Os04g30760,LOC_Os04g55060,LOC_Os05g22940,LOC_Os05g36000,LOC_Os05g49900,LOC_Os06g05130,LOC_Os06g09630,LOC_Os06g11240,LOC_Os07g49310,LOC_Os08g14490,LOC_Os08g23810,LOC_Os09g36860,LOC_Os11g32650	1186	147	32072	3.49524	0.0100181	0.00310726	0.000477054
GOTERM_BP	GO:0009719	response to endogenous stimulus	88	7.4199	3.55e-05	LOC_Os01g09450,LOC_Os01g27160,LOC_Os01g48446,LOC_Os01g49820,LOC_Os01g49830,LOC_Os01g50940,LOC_Os01g53240,LOC_Os01g57470,LOC_Os01g66100,LOC_Os01g67650,LOC_Os02g05060,LOC_Os02g10520,LOC_Os02g11020,LOC_Os02g12790,LOC_Os02g14600,LOC_Os02g38320,LOC_Os02g41860,LOC_Os02g42870,LOC_Os02g43820,LOC_Os02g48770,LOC_Os02g52000,LOC_Os02g52210,LOC_Os03g08330,LOC_Os03g08380,LOC_Os03g10300,LOC_Os03g10810,LOC_Os03g…	1186	1486	32072	1.60142	0.0134304	0.00397628	0.000610474
GOTERM_BP	GO:0005975	carbohydrate metabolic process	72	6.07083	5.65e-05	LOC_Os01g02880,LOC_Os01g04300,LOC_Os01g06450,LOC_Os01g10440,LOC_Os01g19750,LOC_Os01g44970,LOC_Os01g47080,LOC_Os01g49630,LOC_Os01g58740,LOC_Os01g62420,LOC_Os01g63970,LOC_Os01g64100,LOC_Os01g65460,LOC_Os01g66700,LOC_Os01g66940,LOC_Os01g67860,LOC_Os01g74000,LOC_Os02g17900,LOC_Os02g26720,LOC_Os02g33110,LOC_Os02g39330,LOC_Os02g46910,LOC_Os02g51590,LOC_Os02g54890,LOC_Os03g04770,LOC_Os03g06940,LOC_Os03g…	1186	1163	32072	1.67415	0.0213718	0.00605234	0.000929209
GOTERM_BP	GO:0080167	response to karrikin	17	1.43339	7.49e-05	LOC_Os01g49710,LOC_Os01g57470,LOC_Os01g60450,LOC_Os01g65460,LOC_Os01g67860,LOC_Os02g33110,LOC_Os02g42790,LOC_Os03g37640,LOC_Os03g59430,LOC_Os04g21320,LOC_Os04g33740,LOC_Os06g39960,LOC_Os07g49310,LOC_Os08g08840,LOC_Os10g38690,LOC_Os11g04030,LOC_Os12g03899	1186	131	32072	3.50929	0.0283265	0.00752454	0.00115523
GOTERM_BP	GO:0006200	ATP catabolic process	20	1.68634	7.64e-05	LOC_Os01g07870,LOC_Os01g08260,LOC_Os01g25386,LOC_Os01g34970,LOC_Os01g52560,LOC_Os02g08490,LOC_Os03g01120,LOC_Os03g08380,LOC_Os04g13220,LOC_Os04g40570,LOC_Os04g56320,LOC_Os04g57140,LOC_Os05g47500,LOC_Os06g12370,LOC_Os07g09384,LOC_Os07g33780,LOC_Os08g05710,LOC_Os08g30780,LOC_Os08g43120,LOC_Os11g39020	1186	176	32072	3.07297	0.0288808	0.00752454	0.00115523
GOTERM_CC	GO:0005618	cell wall	70	5.90219	8.48e-05	LOC_Os01g04300,LOC_Os01g25540,LOC_Os01g36240,LOC_Os01g41750,LOC_Os01g51770,LOC_Os01g52750,LOC_Os01g58270,LOC_Os01g60450,LOC_Os01g62290,LOC_Os01g62420,LOC_Os01g64850,LOC_Os01g65460,LOC_Os01g66700,LOC_Os01g67860,LOC_Os01g71094,LOC_Os01g73170,LOC_Os02g03140,LOC_Os02g03150,LOC_Os02g03180,LOC_Os02g10520,LOC_Os02g17090,LOC_Os02g17900,LOC_Os02g29000,LOC_Os02g29020,LOC_Os02g33110,LOC_Os02g39330,LOC_Os02g…	1186	1137	32072	1.66486	0.032059	0.00803132	0.00123304
GOTERM_BP	GO:0006810	transport	134	11.2985	0.000137086	LOC_Os01g02190,LOC_Os01g04950,LOC_Os01g07870,LOC_Os01g08260,LOC_Os01g10600,LOC_Os01g11160,LOC_Os01g12440,LOC_Os01g25386,LOC_Os01g31760,LOC_Os01g34970,LOC_Os01g47730,LOC_Os01g50590,LOC_Os01g51040,LOC_Os01g51770,LOC_Os01g52560,LOC_Os01g54590,LOC_Os01g55610,LOC_Os01g58650,LOC_Os01g58660,LOC_Os01g61400,LOC_Os01g63870,LOC_Os01g64850,LOC_Os01g65000,LOC_Os01g65130,LOC_Os01g65380,LOC_Os01g65670,LOC_Os02g…	1186	2596	32072	1.39586	0.0518185	0.0121064	0.00185868
GOTERM_MF	GO:0016798	hydrolase activity, acting on glycosyl bonds	23	1.93929	0.000140613	LOC_Os01g04300,LOC_Os01g19750,LOC_Os01g44970,LOC_Os01g49630,LOC_Os01g64100,LOC_Os01g65460,LOC_Os01g66700,LOC_Os02g33110,LOC_Os02g39330,LOC_Os03g04770,LOC_Os03g06940,LOC_Os03g10440,LOC_Os03g15020,LOC_Os03g49610,LOC_Os03g59330,LOC_Os04g33740,LOC_Os04g39900,LOC_Os04g43410,LOC_Os05g30350,LOC_Os05g35360,LOC_Os05g46520,LOC_Os07g32600,LOC_Os09g33680	1186	234	32072	2.65799	0.0531517	0.0121064	0.00185868
GOTERM_MF	GO:0030246	carbohydrate binding	30	2.52951	0.000142597	LOC_Os01g65460,LOC_Os01g66640,LOC_Os02g48080,LOC_Os03g02550,LOC_Os03g06940,LOC_Os03g10440,LOC_Os03g12150,LOC_Os03g15020,LOC_Os03g15250,LOC_Os03g48610,LOC_Os03g56160,LOC_Os04g23760,LOC_Os04g28780,LOC_Os04g34330,LOC_Os04g34420,LOC_Os04g44900,LOC_Os04g44910,LOC_Os04g53998,LOC_Os05g07420,LOC_Os05g35360,LOC_Os06g30130,LOC_Os07g03900,LOC_Os07g04820,LOC_Os07g38800,LOC_Os07g38810,LOC_Os08g03020,LOC_Os08g…	1186	356	32072	2.27883	0.0539017	0.0121064	0.00185868
GOTERM_MF	GO:0004674	protein serine/threonine kinase activity	80	6.74536	0.000192496	LOC_Os01g14926,LOC_Os01g26390,LOC_Os01g36550,LOC_Os01g43350,LOC_Os01g46030,LOC_Os01g49614,LOC_Os01g50370,LOC_Os01g50410,LOC_Os01g59550,LOC_Os01g64480,LOC_Os01g66640,LOC_Os01g72650,LOC_Os02g02120,LOC_Os02g02780,LOC_Os02g12450,LOC_Os02g13510,LOC_Os02g20140,LOC_Os02g30540,LOC_Os02g43740,LOC_Os02g45750,LOC_Os02g48080,LOC_Os03g06330,LOC_Os03g12150,LOC_Os03g12390,LOC_Os03g15250,LOC_Os03g17700,LOC_Os03g…	1186	1389	32072	1.5575	0.0727634	0.015798	0.00242545
GOTERM_MF	GO:0004713	protein tyrosine kinase activity	76	6.40809	0.000251868	LOC_Os01g14926,LOC_Os01g26390,LOC_Os01g36550,LOC_Os01g43350,LOC_Os01g46030,LOC_Os01g49614,LOC_Os01g50370,LOC_Os01g50410,LOC_Os01g59550,LOC_Os01g66640,LOC_Os02g02120,LOC_Os02g02780,LOC_Os02g12450,LOC_Os02g13510,LOC_Os02g20140,LOC_Os02g30540,LOC_Os02g43740,LOC_Os02g45750,LOC_Os02g48080,LOC_Os03g06330,LOC_Os03g12150,LOC_Os03g12390,LOC_Os03g15250,LOC_Os03g17700,LOC_Os03g56160,LOC_Os04g23760,LOC_Os04g…	1186	1314	32072	1.56408	0.0952062	0.0200038	0.00307117
GOTERM_CC	GO:0016020	membrane	273	23.0185	0.000348889	LOC_Os01g01180,LOC_Os01g02190,LOC_Os01g04950,LOC_Os01g06450,LOC_Os01g06520,LOC_Os01g07870,LOC_Os01g08260,LOC_Os01g08510,LOC_Os01g10440,LOC_Os01g10600,LOC_Os01g11160,LOC_Os01g12650,LOC_Os01g25386,LOC_Os01g26120,LOC_Os01g31850,LOC_Os01g34970,LOC_Os01g46030,LOC_Os01g48420,LOC_Os01g49820,LOC_Os01g51040,LOC_Os01g51670,LOC_Os01g51770,LOC_Os01g52560,LOC_Os01g54590,LOC_Os01g55610,LOC_Os01g57710,LOC_Os01g…	1186	6058	32072	1.21864	0.13188	0.0268435	0.00412126
GOTERM_MF	GO:0046872	metal ion binding	117	9.86509	0.000383971	LOC_Os01g10580,LOC_Os01g14580,LOC_Os01g36240,LOC_Os01g41810,LOC_Os01g43710,LOC_Os01g43774,LOC_Os01g50490,LOC_Os01g50900,LOC_Os01g56310,LOC_Os01g58640,LOC_Os01g60450,LOC_Os01g63980,LOC_Os01g65830,LOC_Os01g66100,LOC_Os01g72530,LOC_Os01g73170,LOC_Os01g74040,LOC_Os02g01700,LOC_Os02g03620,LOC_Os02g05610,LOC_Os02g11020,LOC_Os02g12790,LOC_Os02g29000,LOC_Os02g29020,LOC_Os02g31890,LOC_Os02g37330,LOC_Os02g…	1186	2266	32072	1.39626	0.145141	0.0286474	0.00439821
GOTERM_BP	GO:0006468	protein phosphorylation	81	6.82968	0.000430513	LOC_Os01g14926,LOC_Os01g26390,LOC_Os01g36550,LOC_Os01g43350,LOC_Os01g46030,LOC_Os01g49614,LOC_Os01g50370,LOC_Os01g50410,LOC_Os01g59550,LOC_Os01g64480,LOC_Os01g66640,LOC_Os01g72650,LOC_Os02g02120,LOC_Os02g02780,LOC_Os02g12450,LOC_Os02g13510,LOC_Os02g20140,LOC_Os02g30540,LOC_Os02g43740,LOC_Os02g45750,LOC_Os02g48080,LOC_Os03g01770,LOC_Os03g06330,LOC_Os03g12150,LOC_Os03g12390,LOC_Os03g15250,LOC_Os03g…	1186	1451	32072	1.50959	0.162734	0.0311752	0.00478629
GOTERM_MF	GO:0016887	ATPase activity	21	1.77066	0.000509689	LOC_Os01g07870,LOC_Os01g08260,LOC_Os01g25386,LOC_Os01g34970,LOC_Os01g52560,LOC_Os02g08490,LOC_Os02g32520,LOC_Os03g01120,LOC_Os03g08380,LOC_Os04g13220,LOC_Os04g40570,LOC_Os04g56320,LOC_Os04g57140,LOC_Os05g47500,LOC_Os06g12370,LOC_Os07g09384,LOC_Os07g33780,LOC_Os08g05710,LOC_Os08g30780,LOC_Os08g43120,LOC_Os11g39020	1186	224	32072	2.5352	0.192662	0.0358541	0.00550464
GOTERM_BP	GO:0009628	response to abiotic stimulus	113	9.52782	0.000532956	LOC_Os01g10580,LOC_Os01g14410,LOC_Os01g14580,LOC_Os01g17050,LOC_Os01g19750,LOC_Os01g25386,LOC_Os01g48446,LOC_Os01g53240,LOC_Os01g58740,LOC_Os01g60450,LOC_Os01g61400,LOC_Os01g62290,LOC_Os01g62420,LOC_Os01g63210,LOC_Os01g64100,LOC_Os01g65460,LOC_Os01g66100,LOC_Os01g67650,LOC_Os01g67860,LOC_Os01g70380,LOC_Os01g71094,LOC_Os02g01280,LOC_Os02g04130,LOC_Os02g08490,LOC_Os02g11020,LOC_Os02g12790,LOC_Os02g…	1186	2194	32072	1.39278	0.201457	0.036255	0.0055662
GOTERM_MF	GO:0019825	oxygen binding	28	2.36088	0.000544839	LOC_Os01g41810,LOC_Os01g41820,LOC_Os01g43710,LOC_Os01g43774,LOC_Os01g50490,LOC_Os01g50590,LOC_Os02g09390,LOC_Os02g11020,LOC_Os02g57290,LOC_Os03g21380,LOC_Os03g39690,LOC_Os03g44740,LOC_Os03g61980,LOC_Os05g30890,LOC_Os06g09210,LOC_Os06g09220,LOC_Os06g37364,LOC_Os06g43384,LOC_Os06g45960,LOC_Os07g29960,LOC_Os07g37970,LOC_Os08g33300,LOC_Os08g36860,LOC_Os08g43390,LOC_Os08g43440,LOC_Os10g23130,LOC_Os10g…	1186	351	32072	2.15721	0.205949	0.036255	0.0055662
GOTERM_MF	GO:0016301	kinase activity	111	9.35919	0.000571806	LOC_Os01g04720,LOC_Os01g14926,LOC_Os01g26390,LOC_Os01g36550,LOC_Os01g43350,LOC_Os01g46030,LOC_Os01g47080,LOC_Os01g49614,LOC_Os01g50370,LOC_Os01g50410,LOC_Os01g59550,LOC_Os01g65940,LOC_Os01g66640,LOC_Os01g66940,LOC_Os02g01760,LOC_Os02g02120,LOC_Os02g02780,LOC_Os02g11980,LOC_Os02g12450,LOC_Os02g13510,LOC_Os02g20140,LOC_Os02g26720,LOC_Os02g30540,LOC_Os02g41580,LOC_Os02g43740,LOC_Os02g45750,LOC_Os02g…	1186	2152	32072	1.39483	0.216143	0.0370482	0.00568797
GOTERM_BP	GO:0009751	response to salicylic acid	10	0.84317	0.000920189	LOC_Os01g63690,LOC_Os02g42870,LOC_Os03g56160,LOC_Os04g44900,LOC_Os04g44910,LOC_Os07g03900,LOC_Os07g38800,LOC_Os07g38810,LOC_Os08g43550,LOC_Os10g33170	1186	62	32072	4.36164	0.347831	0.0580917	0.00891875
GOTERM_BP	GO:0009607	response to biotic stimulus	63	5.31197	0.00101304	LOC_Os01g14580,LOC_Os01g25386,LOC_Os01g41750,LOC_Os01g51770,LOC_Os01g62290,LOC_Os01g64470,LOC_Os01g64480,LOC_Os01g65000,LOC_Os02g01280,LOC_Os02g03140,LOC_Os02g03150,LOC_Os02g03180,LOC_Os02g08440,LOC_Os02g53180,LOC_Os03g05310,LOC_Os03g05880,LOC_Os03g07350,LOC_Os03g08330,LOC_Os03g17700,LOC_Os03g39690,LOC_Os03g50960,LOC_Os03g54130,LOC_Os04g12660,LOC_Os04g13090,LOC_Os04g13220,LOC_Os04g14690,LOC_Os04g…	1186	1095	32072	1.55585	0.382931	0.0623548	0.00957327
GOTERM_MF	GO:0050662	coenzyme binding	15	1.26476	0.00119229	LOC_Os01g58740,LOC_Os01g61230,LOC_Os01g74000,LOC_Os01g74660,LOC_Os02g35500,LOC_Os02g54890,LOC_Os02g56460,LOC_Os03g29150,LOC_Os07g40250,LOC_Os07g40986,LOC_Os08g41440,LOC_Os09g31502,LOC_Os11g25160,LOC_Os12g08060,LOC_Os12g23180	1186	139	32072	2.91822	0.450686	0.0715979	0.0109923
GOTERM_MF	GO:0004672	protein kinase activity	77	6.49241	0.00126668	LOC_Os01g14926,LOC_Os01g26390,LOC_Os01g36550,LOC_Os01g43350,LOC_Os01g46030,LOC_Os01g49614,LOC_Os01g50370,LOC_Os01g50410,LOC_Os01g59550,LOC_Os01g64480,LOC_Os01g66640,LOC_Os02g02120,LOC_Os02g02780,LOC_Os02g12450,LOC_Os02g13510,LOC_Os02g20140,LOC_Os02g30540,LOC_Os02g43740,LOC_Os02g45750,LOC_Os02g48080,LOC_Os03g06330,LOC_Os03g12150,LOC_Os03g12390,LOC_Os03g15250,LOC_Os03g17700,LOC_Os03g56160,LOC_Os04g…	1186	1419	32072	1.4674	0.478805	0.0742539	0.0114001
GOTERM_CC	GO:0009288	bacterial-type flagellum	8	0.674536	0.00147116	LOC_Os01g72530,LOC_Os01g72540,LOC_Os01g72550,LOC_Os03g21380,LOC_Os04g41540,LOC_Os05g13580,LOC_Os05g31620,LOC_Os12g08060	1186	41	32072	5.27652	0.556099	0.0842352	0.0129325
GOTERM_MF	GO:0042626	ATPase activity, coupled to transmembrane movement of substances	10	0.84317	0.00180649	LOC_Os01g07870,LOC_Os01g08260,LOC_Os01g25386,LOC_Os01g34970,LOC_Os03g08380,LOC_Os03g18790,LOC_Os04g13220,LOC_Os04g40570,LOC_Os05g47500,LOC_Os08g05710	1186	69	32072	3.91915	0.682851	0.101084	0.0155193
GOTERM_BP	GO:0016310	phosphorylation	65	5.48061	0.00201463	LOC_Os01g04720,LOC_Os01g26390,LOC_Os01g43350,LOC_Os01g46030,LOC_Os01g47080,LOC_Os01g49614,LOC_Os01g66640,LOC_Os01g66940,LOC_Os02g01760,LOC_Os02g02120,LOC_Os02g02780,LOC_Os02g13510,LOC_Os02g26720,LOC_Os02g45750,LOC_Os02g48080,LOC_Os03g06330,LOC_Os03g12150,LOC_Os03g12390,LOC_Os03g15250,LOC_Os03g17174,LOC_Os03g17700,LOC_Os03g30130,LOC_Os03g46910,LOC_Os03g56160,LOC_Os04g23760,LOC_Os04g28780,LOC_Os04g…	1186	1174	32072	1.49722	0.76153	0.110226	0.0169229
GOTERM_MF	GO:0016705	oxidoreductase activity, acting on paired donors, with incorporation or reduction of molecular oxygen	25	2.10793	0.00258451	LOC_Os01g41810,LOC_Os01g41820,LOC_Os01g43710,LOC_Os01g43774,LOC_Os01g50490,LOC_Os01g60450,LOC_Os02g11020,LOC_Os02g57290,LOC_Os03g04630,LOC_Os03g04640,LOC_Os03g39690,LOC_Os03g44740,LOC_Os03g58890,LOC_Os05g30890,LOC_Os06g09220,LOC_Os06g37364,LOC_Os06g43384,LOC_Os06g45960,LOC_Os07g37970,LOC_Os08g33300,LOC_Os08g36860,LOC_Os08g43390,LOC_Os08g43440,LOC_Os10g23130,LOC_Os10g23180	1186	335	32072	2.01807	0.976945	0.138332	0.0212379
GOTERM_MF	GO:0042802	identical protein binding	12	1.0118	0.00333362	LOC_Os01g52750,LOC_Os01g58270,LOC_Os01g64850,LOC_Os02g10520,LOC_Os02g17090,LOC_Os02g53860,LOC_Os03g02750,LOC_Os03g44420,LOC_Os03g55200,LOC_Os04g03796,LOC_Os04g45210,LOC_Os04g47160	1186	107	32072	3.03277	1	0.174631	0.0268108
GOTERM_MF	GO:0020037	heme binding	34	2.86678	0.00391226	LOC_Os01g36240,LOC_Os01g41810,LOC_Os01g41820,LOC_Os01g43710,LOC_Os01g43774,LOC_Os01g50490,LOC_Os01g59450,LOC_Os01g60450,LOC_Os01g73170,LOC_Os02g11020,LOC_Os02g57290,LOC_Os03g04630,LOC_Os03g04640,LOC_Os03g13200,LOC_Os03g21380,LOC_Os03g39690,LOC_Os03g44740,LOC_Os04g01550,LOC_Os04g04750,LOC_Os04g39100,LOC_Os04g56700,LOC_Os05g30890,LOC_Os06g09220,LOC_Os06g37364,LOC_Os06g43384,LOC_Os06g45960,LOC_Os07g…	1186	530	32072	1.73478	1	0.198137	0.0304198
GOTERM_BP	GO:0043086	negative regulation of catalytic activity	13	1.09612	0.00394331	LOC_Os01g52750,LOC_Os01g58270,LOC_Os01g64850,LOC_Os02g10520,LOC_Os02g17090,LOC_Os02g53860,LOC_Os03g02750,LOC_Os03g28090,LOC_Os04g03796,LOC_Os04g47160,LOC_Os05g05640,LOC_Os07g08840,LOC_Os08g01670	1186	126	32072	2.79006	1	0.198137	0.0304198
GOTERM_CC	GO:0009507	chloroplast	88	7.4199	0.00433186	LOC_Os01g02080,LOC_Os01g44050,LOC_Os01g47080,LOC_Os01g48420,LOC_Os01g49710,LOC_Os01g51770,LOC_Os01g56310,LOC_Os01g59920,LOC_Os01g61400,LOC_Os01g62420,LOC_Os01g65830,LOC_Os01g67860,LOC_Os01g72280,LOC_Os01g74000,LOC_Os02g01280,LOC_Os02g05610,LOC_Os02g08490,LOC_Os02g32520,LOC_Os02g36850,LOC_Os02g41860,LOC_Os02g55420,LOC_Os02g57290,LOC_Os03g01770,LOC_Os03g05310,LOC_Os03g06710,LOC_Os03g07960,LOC_Os03g…	1186	1750	32072	1.35983	1	0.213307	0.0327488
GOTERM_MF	GO:0004758	serine C-palmitoyltransferase activity	4	0.337268	0.00448681	LOC_Os01g70380,LOC_Os02g56300,LOC_Os10g11200,LOC_Os11g31640	1186	7	32072	15.4527	1	0.216605	0.0332552
GOTERM_MF	GO:0009055	electron carrier activity	49	4.13153	0.00459296	LOC_Os01g07376,LOC_Os01g36240,LOC_Os01g41810,LOC_Os01g41820,LOC_Os01g43710,LOC_Os01g43774,LOC_Os01g50490,LOC_Os01g60450,LOC_Os01g73170,LOC_Os02g11020,LOC_Os02g48820,LOC_Os02g57290,LOC_Os03g04630,LOC_Os03g04640,LOC_Os03g05310,LOC_Os03g13200,LOC_Os03g39690,LOC_Os03g44740,LOC_Os03g57740,LOC_Os04g01550,LOC_Os04g04750,LOC_Os04g14690,LOC_Os04g39100,LOC_Os04g56700,LOC_Os05g06460,LOC_Os05g30890,LOC_Os05g…	1186	860	32072	1.54077	1	0.217466	0.0333873
GOTERM_MF	GO:0016772	transferase activity, transferring phosphorus-containing groups	75	6.32378	0.00472011	LOC_Os01g14926,LOC_Os01g26390,LOC_Os01g36550,LOC_Os01g43350,LOC_Os01g46030,LOC_Os01g49614,LOC_Os01g50370,LOC_Os01g50410,LOC_Os01g59550,LOC_Os01g64480,LOC_Os01g66640,LOC_Os01g72650,LOC_Os02g02120,LOC_Os02g02780,LOC_Os02g13510,LOC_Os02g43740,LOC_Os02g45750,LOC_Os02g48080,LOC_Os03g06330,LOC_Os03g12150,LOC_Os03g12390,LOC_Os03g15250,LOC_Os03g17700,LOC_Os03g56160,LOC_Os04g23760,LOC_Os04g24220,LOC_Os04g…	1186	1452	32072	1.39681	1	0.21927	0.0336642
GOTERM_MF	GO:0004497	monooxygenase activity	26	2.19224	0.00507998	LOC_Os01g41810,LOC_Os01g41820,LOC_Os01g43710,LOC_Os01g43774,LOC_Os01g50490,LOC_Os01g59450,LOC_Os01g60450,LOC_Os02g11020,LOC_Os02g57290,LOC_Os03g04630,LOC_Os03g04640,LOC_Os03g06654,LOC_Os03g39690,LOC_Os03g44740,LOC_Os05g30890,LOC_Os06g09220,LOC_Os06g37364,LOC_Os06g43384,LOC_Os06g45960,LOC_Os07g37970,LOC_Os08g33300,LOC_Os08g36860,LOC_Os08g43390,LOC_Os08g43440,LOC_Os10g23130,LOC_Os10g23180	1186	375	32072	1.87492	1	0.231617	0.0355598
GOTERM_BP	GO:0006096	glycolytic process	15	1.26476	0.00530265	LOC_Os01g02880,LOC_Os01g47080,LOC_Os01g62420,LOC_Os01g67860,LOC_Os02g51590,LOC_Os03g44300,LOC_Os03g44420,LOC_Os03g46910,LOC_Os05g49880,LOC_Os06g01590,LOC_Os06g04510,LOC_Os06g45710,LOC_Os08g33720,LOC_Os09g20820,LOC_Os12g42230	1186	166	32072	2.44357	1	0.234806	0.0360495
GOTERM_BP	GO:0001539	cilium or flagellum-dependent cell motility	8	0.674536	0.00534066	LOC_Os01g72530,LOC_Os01g72540,LOC_Os01g72550,LOC_Os03g21380,LOC_Os04g41540,LOC_Os05g13580,LOC_Os05g31620,LOC_Os12g08060	1186	53	32072	4.08184	1	0.234806	0.0360495
GOTERM_MF	GO:0008233	peptidase activity	27	2.27656	0.00552769	LOC_Os01g52750,LOC_Os01g58270,LOC_Os02g10520,LOC_Os02g17090,LOC_Os02g27360,LOC_Os02g32520,LOC_Os02g50730,LOC_Os02g53860,LOC_Os03g02750,LOC_Os03g27120,LOC_Os03g50960,LOC_Os03g54130,LOC_Os04g03796,LOC_Os04g12660,LOC_Os04g13090,LOC_Os04g47160,LOC_Os04g57490,LOC_Os05g43830,LOC_Os06g12370,LOC_Os06g20140,LOC_Os06g21380,LOC_Os07g07860,LOC_Os08g10670,LOC_Os08g41610,LOC_Os08g41730,LOC_Os09g38920,LOC_Os12g…	1186	398	32072	1.83452	1	0.238765	0.0366573
GOTERM_MF	GO:0004675	transmembrane receptor protein serine/threonine kinase activity	6	0.505902	0.00589439	LOC_Os03g56160,LOC_Os04g44900,LOC_Os04g44910,LOC_Os07g03900,LOC_Os07g38800,LOC_Os07g38810	1186	28	32072	5.79475	1	0.245974	0.0377641
GOTERM_BP	GO:0007178	transmembrane receptor protein serine/threonine kinase signaling pathway	6	0.505902	0.00589439	LOC_Os03g56160,LOC_Os04g44900,LOC_Os04g44910,LOC_Os07g03900,LOC_Os07g38800,LOC_Os07g38810	1186	28	32072	5.79475	1	0.245974	0.0377641
GOTERM_MF	GO:0043169	cation binding	16	1.34907	0.00665436	LOC_Os01g04300,LOC_Os01g19750,LOC_Os01g64100,LOC_Os01g65460,LOC_Os03g04770,LOC_Os03g06940,LOC_Os03g10440,LOC_Os03g15020,LOC_Os03g49610,LOC_Os03g51240,LOC_Os04g39900,LOC_Os04g43410,LOC_Os05g30350,LOC_Os05g35360,LOC_Os07g32600,LOC_Os09g33680	1186	189	32072	2.28928	1	0.273059	0.0419224
GOTERM_BP	GO:0006139	nucleobase-containing compound metabolic process	163	13.7437	0.00696257	LOC_Os01g02880,LOC_Os01g07870,LOC_Os01g08190,LOC_Os01g08260,LOC_Os01g09450,LOC_Os01g10580,LOC_Os01g12440,LOC_Os01g14580,LOC_Os01g17000,LOC_Os01g21120,LOC_Os01g21420,LOC_Os01g25386,LOC_Os01g32770,LOC_Os01g34970,LOC_Os01g36460,LOC_Os01g38610,LOC_Os01g43480,LOC_Os01g48130,LOC_Os01g48446,LOC_Os01g49830,LOC_Os01g50940,LOC_Os01g52560,LOC_Os01g61400,LOC_Os01g62920,LOC_Os01g63980,LOC_Os01g64360,LOC_Os01g…	1186	3614	32072	1.21967	1	0.281023	0.0431451
GOTERM_BP	GO:0009611	response to wounding	13	1.09612	0.00722247	LOC_Os01g25386,LOC_Os01g60450,LOC_Os02g33110,LOC_Os03g02550,LOC_Os03g17700,LOC_Os04g33740,LOC_Os06g47620,LOC_Os07g42960,LOC_Os08g33710,LOC_Os08g34249,LOC_Os10g33170,LOC_Os11g32650,LOC_Os12g09089	1186	137	32072	2.56604	1	0.286811	0.0440338
GOTERM_MF	GO:0004553	hydrolase activity, hydrolyzing O-glycosyl compounds	22	1.85497	0.00745376	LOC_Os01g04300,LOC_Os01g19750,LOC_Os01g49630,LOC_Os01g64100,LOC_Os01g65460,LOC_Os01g66700,LOC_Os02g17900,LOC_Os02g33110,LOC_Os02g46910,LOC_Os03g06940,LOC_Os03g10440,LOC_Os03g15020,LOC_Os03g49610,LOC_Os03g51240,LOC_Os04g33740,LOC_Os04g39900,LOC_Os04g43410,LOC_Os05g30350,LOC_Os05g35360,LOC_Os07g32600,LOC_Os09g33680,LOC_Os10g05069	1186	307	32072	1.93787	1	0.291297	0.0447226
GOTERM_BP	GO:0016117	carotenoid biosynthetic process	9	0.758853	0.00821593	LOC_Os02g57290,LOC_Os03g36750,LOC_Os04g56320,LOC_Os07g10490,LOC_Os08g17390,LOC_Os09g36130,LOC_Os11g36440,LOC_Os12g23180,LOC_Os12g43130	1186	73	32072	3.33396	1	0.313069	0.0480651
GOTERM_MF	GO:0004565	beta-galactosidase activity	5	0.421585	0.00826516	LOC_Os01g65460,LOC_Os03g06940,LOC_Os03g15020,LOC_Os03g49610,LOC_Os05g35360	1186	19	32072	7.11636	1	0.313069	0.0480651
GOTERM_BP	GO:0015996	chlorophyll catabolic process	6	0.505902	0.00857749	LOC_Os03g05310,LOC_Os05g47560,LOC_Os06g21380,LOC_Os06g24730,LOC_Os06g45480,LOC_Os09g36200	1186	31	32072	5.23397	1	0.318142	0.048844
GOTERM_CC	GO:0009505	plant-type cell wall	17	1.43339	0.00865754	LOC_Os01g60450,LOC_Os01g65460,LOC_Os01g66700,LOC_Os01g73170,LOC_Os02g39330,LOC_Os02g42310,LOC_Os02g42790,LOC_Os02g52040,LOC_Os02g53860,LOC_Os03g13200,LOC_Os03g49610,LOC_Os04g39100,LOC_Os04g39900,LOC_Os07g41360,LOC_Os08g44150,LOC_Os10g39560,LOC_Os11g05860	1186	214	32072	2.14821	1	0.318142	0.048844
Region 5
Type	Term	Description	Count	%	PValue	Genes	ListTotal	PopHits	PopTotal	FoldChange	Bonferroni	Benjamini	FDR
GOTERM_BP	GO:0008152	metabolic process	987	32.8562	5.04e-23	LOC_Os01g01660,LOC_Os01g02020,LOC_Os01g02310,LOC_Os01g02420,LOC_Os01g02550,LOC_Os01g02560,LOC_Os01g02570,LOC_Os01g02580,LOC_Os01g02730,LOC_Os01g02750,LOC_Os01g02770,LOC_Os01g02780,LOC_Os01g02790,LOC_Os01g02800,LOC_Os01g02810,LOC_Os01g02900,LOC_Os01g02940,LOC_Os01g03530,LOC_Os01g04290,LOC_Os01g06220,LOC_Os01g06730,LOC_Os01g06870,LOC_Os01g07090,LOC_Os01g08110,LOC_Os01g08380,LOC_Os01g08550,LOC_Os01g…	3004	7849	32072	1.34255	3.93e-20	2.85e-19	3.93e-20
GOTERM_CC	GO:0016023	cytoplasmic membrane-bounded vesicle	627	20.8722	4.34e-22	LOC_Os01g02060,LOC_Os01g02310,LOC_Os01g02420,LOC_Os01g02550,LOC_Os01g02560,LOC_Os01g02570,LOC_Os01g02730,LOC_Os01g02770,LOC_Os01g02800,LOC_Os01g02810,LOC_Os01g02870,LOC_Os01g03340,LOC_Os01g03390,LOC_Os01g03530,LOC_Os01g04050,LOC_Os01g06990,LOC_Os01g07250,LOC_Os01g10470,LOC_Os01g10490,LOC_Os01g10950,LOC_Os01g11620,LOC_Os01g11700,LOC_Os01g11710,LOC_Os01g12070,LOC_Os01g12320,LOC_Os01g12410,LOC_Os01g…	3004	4509	32072	1.48461	3.39e-19	1.23e-18	1.69e-19
GOTERM_CC	GO:0005623	cell	387	12.8828	5.1e-15	LOC_Os01g02420,LOC_Os01g02550,LOC_Os01g02560,LOC_Os01g02570,LOC_Os01g02580,LOC_Os01g02730,LOC_Os01g02750,LOC_Os01g02770,LOC_Os01g02780,LOC_Os01g02790,LOC_Os01g02800,LOC_Os01g02810,LOC_Os01g02870,LOC_Os01g05980,LOC_Os01g06730,LOC_Os01g06870,LOC_Os01g06990,LOC_Os01g07150,LOC_Os01g10504,LOC_Os01g11620,LOC_Os01g11700,LOC_Os01g11710,LOC_Os01g11730,LOC_Os01g12070,LOC_Os01g12320,LOC_Os01g12410,LOC_Os01g…	3004	2702	32072	1.52916	3.97e-12	7.65e-12	1.06e-12
GOTERM_CC	GO:0016020	membrane	749	24.9334	5.42e-15	LOC_Os01g01780,LOC_Os01g02000,LOC_Os01g02570,LOC_Os01g02870,LOC_Os01g03530,LOC_Os01g05080,LOC_Os01g05980,LOC_Os01g06580,LOC_Os01g08350,LOC_Os01g10900,LOC_Os01g10950,LOC_Os01g10960,LOC_Os01g11250,LOC_Os01g12130,LOC_Os01g12430,LOC_Os01g12460,LOC_Os01g12680,LOC_Os01g12790,LOC_Os01g12900,LOC_Os01g13130,LOC_Os01g13560,LOC_Os01g14990,LOC_Os01g16030,LOC_Os01g17170,LOC_Os01g17214,LOC_Os01g17240,LOC_Os01g…	3004	6058	32072	1.32001	4.23e-12	7.65e-12	1.06e-12
GOTERM_MF	GO:0003824	catalytic activity	562	18.7084	1.92e-13	LOC_Os01g01660,LOC_Os01g02020,LOC_Os01g02050,LOC_Os01g03530,LOC_Os01g07090,LOC_Os01g07850,LOC_Os01g08550,LOC_Os01g09700,LOC_Os01g10830,LOC_Os01g11710,LOC_Os01g11730,LOC_Os01g12070,LOC_Os01g12160,LOC_Os01g12560,LOC_Os01g12570,LOC_Os01g12750,LOC_Os01g12760,LOC_Os01g12940,LOC_Os01g13090,LOC_Os01g13480,LOC_Os01g13570,LOC_Os01g15810,LOC_Os01g17170,LOC_Os01g18320,LOC_Os01g22249,LOC_Os01g22352,LOC_Os01g…	3004	4383	32072	1.36896	1.5e-10	2.17e-10	3e-11
GOTERM_MF	GO:0005506	iron ion binding	137	4.56059	1.06e-12	LOC_Os01g12750,LOC_Os01g12760,LOC_Os01g17170,LOC_Os01g22249,LOC_Os01g22352,LOC_Os01g24780,LOC_Os01g25010,LOC_Os01g27890,LOC_Os01g36294,LOC_Os01g43700,LOC_Os01g53020,LOC_Os01g57730,LOC_Os01g57962,LOC_Os01g61880,LOC_Os01g65902,LOC_Os01g72740,LOC_Os01g73200,LOC_Os02g01890,LOC_Os02g02230,LOC_Os02g10120,LOC_Os02g12680,LOC_Os02g12690,LOC_Os02g14430,LOC_Os02g26810,LOC_Os02g38290,LOC_Os02g39160,LOC_Os02g…	3004	717	32072	2.03999	8.27e-10	9.97e-10	1.38e-10
GOTERM_BP	GO:0006950	response to stress	485	16.1451	1.62e-12	LOC_Os01g01660,LOC_Os01g02000,LOC_Os01g03530,LOC_Os01g06730,LOC_Os01g06870,LOC_Os01g08350,LOC_Os01g09080,LOC_Os01g09280,LOC_Os01g12160,LOC_Os01g12580,LOC_Os01g15270,LOC_Os01g15810,LOC_Os01g16860,LOC_Os01g18050,LOC_Os01g18860,LOC_Os01g19820,LOC_Os01g22249,LOC_Os01g22352,LOC_Os01g24550,LOC_Os01g24820,LOC_Os01g25030,LOC_Os01g25740,LOC_Os01g27240,LOC_Os01g28450,LOC_Os01g32780,LOC_Os01g33810,LOC_Os01g…	3004	3723	32072	1.39083	1.26e-09	1.3e-09	1.8e-10
GOTERM_MF	GO:0009055	electron carrier activity	154	5.1265	3.22e-12	LOC_Os01g12750,LOC_Os01g12760,LOC_Os01g13480,LOC_Os01g15810,LOC_Os01g18320,LOC_Os01g22249,LOC_Os01g22352,LOC_Os01g24780,LOC_Os01g27890,LOC_Os01g36294,LOC_Os01g43700,LOC_Os01g47760,LOC_Os01g51320,LOC_Os01g53020,LOC_Os01g57730,LOC_Os01g57880,LOC_Os01g61880,LOC_Os01g65902,LOC_Os01g72740,LOC_Os01g73200,LOC_Os02g01340,LOC_Os02g01890,LOC_Os02g02230,LOC_Os02g10120,LOC_Os02g12680,LOC_Os02g12690,LOC_Os02g…	3004	860	32072	1.91183	2.51e-09	2.28e-09	3.14e-10
GOTERM_BP	GO:0005975	carbohydrate metabolic process	189	6.29161	1.76e-11	LOC_Os01g04290,LOC_Os01g07850,LOC_Os01g11700,LOC_Os01g12070,LOC_Os01g19170,LOC_Os01g22640,LOC_Os01g22660,LOC_Os01g42350,LOC_Os01g42380,LOC_Os01g42810,LOC_Os01g46120,LOC_Os01g53930,LOC_Os01g54620,LOC_Os01g56570,LOC_Os01g57770,LOC_Os01g59840,LOC_Os01g63220,LOC_Os01g64110,LOC_Os01g70180,LOC_Os01g70200,LOC_Os01g70520,LOC_Os01g71380,LOC_Os01g71700,LOC_Os01g71860,LOC_Os02g03120,LOC_Os02g05030,LOC_Os02g…	3004	1163	32072	1.73503	1.38e-08	1.11e-08	1.53e-09
GOTERM_BP	GO:0055114	oxidation-reduction process	228	7.58988	2.05e-10	LOC_Os01g03530,LOC_Os01g12750,LOC_Os01g12760,LOC_Os01g15810,LOC_Os01g17170,LOC_Os01g18320,LOC_Os01g22249,LOC_Os01g22352,LOC_Os01g24780,LOC_Os01g25010,LOC_Os01g27240,LOC_Os01g27890,LOC_Os01g36294,LOC_Os01g43700,LOC_Os01g46380,LOC_Os01g51320,LOC_Os01g53200,LOC_Os01g54030,LOC_Os01g57730,LOC_Os01g61160,LOC_Os01g61880,LOC_Os01g64520,LOC_Os01g65902,LOC_Os01g67370,LOC_Os01g72740,LOC_Os01g73200,LOC_Os02g…	3004	1532	32072	1.58892	1.6e-07	1.16e-07	1.6e-08
GOTERM_MF	GO:0016491	oxidoreductase activity	213	7.09055	1.22e-09	LOC_Os01g03530,LOC_Os01g12750,LOC_Os01g12760,LOC_Os01g13480,LOC_Os01g15810,LOC_Os01g17170,LOC_Os01g18320,LOC_Os01g22249,LOC_Os01g22352,LOC_Os01g24780,LOC_Os01g25010,LOC_Os01g27240,LOC_Os01g27890,LOC_Os01g43700,LOC_Os01g46380,LOC_Os01g51320,LOC_Os01g53200,LOC_Os01g54030,LOC_Os01g57730,LOC_Os01g61160,LOC_Os01g61880,LOC_Os01g64520,LOC_Os01g67370,LOC_Os01g72740,LOC_Os01g73200,LOC_Os02g01340,LOC_Os02g…	3004	1438	32072	1.58142	9.51e-07	6.26e-07	8.64e-08
GOTERM_MF	GO:0020037	heme binding	101	3.36218	1.34e-09	LOC_Os01g12750,LOC_Os01g12760,LOC_Os01g15810,LOC_Os01g22249,LOC_Os01g22352,LOC_Os01g24780,LOC_Os01g27890,LOC_Os01g36294,LOC_Os01g43700,LOC_Os01g57730,LOC_Os01g65902,LOC_Os01g72740,LOC_Os01g73200,LOC_Os02g01890,LOC_Os02g02230,LOC_Os02g12680,LOC_Os02g12690,LOC_Os02g14430,LOC_Os02g26810,LOC_Os02g38290,LOC_Os02g42740,LOC_Os03g02939,LOC_Os03g04190,LOC_Os03g04530,LOC_Os03g04650,LOC_Os03g04660,LOC_Os03g…	3004	530	32072	2.03457	1.05e-06	6.29e-07	8.69e-08
GOTERM_BP	GO:0009607	response to biotic stimulus	172	5.7257	1.45e-09	LOC_Os01g02060,LOC_Os01g02310,LOC_Os01g12160,LOC_Os01g12580,LOC_Os01g16860,LOC_Os01g17214,LOC_Os01g17240,LOC_Os01g24550,LOC_Os01g24820,LOC_Os01g28450,LOC_Os01g41770,LOC_Os01g41780,LOC_Os01g41910,LOC_Os01g41930,LOC_Os01g42350,LOC_Os01g42380,LOC_Os01g43550,LOC_Os01g45140,LOC_Os01g49430,LOC_Os01g54620,LOC_Os01g63770,LOC_Os01g64790,LOC_Os01g66510,LOC_Os01g71380,LOC_Os01g71860,LOC_Os02g01340,LOC_Os02g…	3004	1095	32072	1.67703	1.13e-06	6.29e-07	8.69e-08
GOTERM_BP	GO:0019748	secondary metabolic process	96	3.19574	1.95e-09	LOC_Os01g08110,LOC_Os01g25010,LOC_Os01g27210,LOC_Os01g27360,LOC_Os01g37750,LOC_Os01g42350,LOC_Os01g42380,LOC_Os01g54620,LOC_Os01g61160,LOC_Os01g70770,LOC_Os02g26810,LOC_Os02g39160,LOC_Os02g46260,LOC_Os02g51440,LOC_Os02g56720,LOC_Os03g03034,LOC_Os03g04250,LOC_Os03g12270,LOC_Os03g16610,LOC_Os03g32470,LOC_Os04g08824,LOC_Os04g08828,LOC_Os04g09430,LOC_Os04g28520,LOC_Os04g43360,LOC_Os04g49194,LOC_Os04g…	3004	497	32072	2.06225	1.52e-06	7.86e-07	1.09e-07
GOTERM_BP	GO:0009987	cellular process	826	27.4967	7.71e-09	LOC_Os01g01350,LOC_Os01g02310,LOC_Os01g02420,LOC_Os01g02550,LOC_Os01g02560,LOC_Os01g02570,LOC_Os01g02580,LOC_Os01g02730,LOC_Os01g02750,LOC_Os01g02770,LOC_Os01g02780,LOC_Os01g02790,LOC_Os01g02800,LOC_Os01g02810,LOC_Os01g06580,LOC_Os01g06730,LOC_Os01g06870,LOC_Os01g07090,LOC_Os01g08110,LOC_Os01g09700,LOC_Os01g10830,LOC_Os01g11250,LOC_Os01g11940,LOC_Os01g12130,LOC_Os01g12160,LOC_Os01g12460,LOC_Os01g…	3004	7318	32072	1.20507	6.01e-06	2.9e-06	4.01e-07
GOTERM_BP	GO:0009628	response to abiotic stimulus	292	9.72037	1.55e-08	LOC_Os01g03530,LOC_Os01g04800,LOC_Os01g08130,LOC_Os01g08140,LOC_Os01g09280,LOC_Os01g11940,LOC_Os01g12160,LOC_Os01g12580,LOC_Os01g17240,LOC_Os01g18050,LOC_Os01g18860,LOC_Os01g20970,LOC_Os01g22249,LOC_Os01g22920,LOC_Os01g24820,LOC_Os01g38229,LOC_Os01g39020,LOC_Os01g41900,LOC_Os01g44360,LOC_Os01g46760,LOC_Os01g47410,LOC_Os01g49240,LOC_Os01g49430,LOC_Os01g50100,LOC_Os01g53900,LOC_Os01g54620,LOC_Os01g…	3004	2194	32072	1.42093	1.21e-05	5.48e-06	7.58e-07
GOTERM_CC	GO:0009535	chloroplast thylakoid membrane	64	2.13049	2.39e-08	LOC_Os01g05080,LOC_Os01g17170,LOC_Os01g17240,LOC_Os01g40310,LOC_Os01g48900,LOC_Os01g58049,LOC_Os01g64960,LOC_Os01g65902,LOC_Os02g01340,LOC_Os02g10390,LOC_Os02g12680,LOC_Os02g12690,LOC_Os02g33020,LOC_Os02g35090,LOC_Os02g39730,LOC_Os02g47020,LOC_Os02g49680,LOC_Os02g51080,LOC_Os02g57030,LOC_Os03g03720,LOC_Os03g39610,LOC_Os03g55970,LOC_Os03g56670,LOC_Os03g64020,LOC_Os04g16770,LOC_Os04g38410,LOC_Os04g…	3004	292	32072	2.34004	1.86e-05	7.77e-06	1.07e-06
GOTERM_CC	GO:0009579	thylakoid	105	3.49534	2.48e-08	LOC_Os01g01280,LOC_Os01g05080,LOC_Os01g17170,LOC_Os01g17240,LOC_Os01g40310,LOC_Os01g48900,LOC_Os01g57962,LOC_Os01g58049,LOC_Os01g62610,LOC_Os01g64960,LOC_Os01g65902,LOC_Os01g69200,LOC_Os02g01340,LOC_Os02g10120,LOC_Os02g10390,LOC_Os02g12680,LOC_Os02g12690,LOC_Os02g24574,LOC_Os02g33020,LOC_Os02g35090,LOC_Os02g39730,LOC_Os02g42740,LOC_Os02g47020,LOC_Os02g49680,LOC_Os02g51080,LOC_Os02g51710,LOC_Os02g…	3004	597	32072	1.87776	1.93e-05	7.77e-06	1.07e-06
GOTERM_MF	GO:0005215	transporter activity	221	7.35686	2.95e-08	LOC_Os01g11250,LOC_Os01g12130,LOC_Os01g12680,LOC_Os01g13130,LOC_Os01g16030,LOC_Os01g17214,LOC_Os01g17240,LOC_Os01g31940,LOC_Os01g31980,LOC_Os01g42350,LOC_Os01g42380,LOC_Os01g42410,LOC_Os01g42900,LOC_Os01g45750,LOC_Os01g50100,LOC_Os01g50616,LOC_Os01g55200,LOC_Os01g56420,LOC_Os01g58010,LOC_Os01g61940,LOC_Os01g63770,LOC_Os01g64890,LOC_Os01g65100,LOC_Os01g65110,LOC_Os01g65169,LOC_Os01g65880,LOC_Os01g…	3004	1574	32072	1.49904	2.3e-05	8.76e-06	1.21e-06
GOTERM_BP	GO:0009058	biosynthetic process	553	18.4088	6.83e-08	LOC_Os01g02110,LOC_Os01g04750,LOC_Os01g04800,LOC_Os01g08110,LOC_Os01g09080,LOC_Os01g09280,LOC_Os01g09620,LOC_Os01g09700,LOC_Os01g09930,LOC_Os01g09990,LOC_Os01g10504,LOC_Os01g11700,LOC_Os01g11910,LOC_Os01g12560,LOC_Os01g12570,LOC_Os01g12860,LOC_Os01g13090,LOC_Os01g13300,LOC_Os01g13480,LOC_Os01g14110,LOC_Os01g14630,LOC_Os01g15900,LOC_Os01g16030,LOC_Os01g16810,LOC_Os01g16860,LOC_Os01g17170,LOC_Os01g…	3004	4709	32072	1.25378	5.33e-05	1.93e-05	2.66e-06
GOTERM_MF	GO:0046872	metal ion binding	295	9.82024	8.22e-08	LOC_Os01g03530,LOC_Os01g07090,LOC_Os01g09620,LOC_Os01g09660,LOC_Os01g10400,LOC_Os01g12750,LOC_Os01g12760,LOC_Os01g15810,LOC_Os01g17170,LOC_Os01g18860,LOC_Os01g20830,LOC_Os01g20930,LOC_Os01g22249,LOC_Os01g22352,LOC_Os01g24780,LOC_Os01g27890,LOC_Os01g41990,LOC_Os01g43100,LOC_Os01g43700,LOC_Os01g46380,LOC_Os01g46760,LOC_Os01g47760,LOC_Os01g54030,LOC_Os01g54620,LOC_Os01g57650,LOC_Os01g57730,LOC_Os01g…	3004	2266	32072	1.38991	6.41e-05	2.21e-05	3.05e-06
GOTERM_MF	GO:0016740	transferase activity	307	10.2197	9.34e-08	LOC_Os01g01780,LOC_Os01g02020,LOC_Os01g02900,LOC_Os01g02940,LOC_Os01g08110,LOC_Os01g08380,LOC_Os01g12160,LOC_Os01g12420,LOC_Os01g12430,LOC_Os01g12560,LOC_Os01g12570,LOC_Os01g14630,LOC_Os01g18860,LOC_Os01g24790,LOC_Os01g26000,LOC_Os01g27210,LOC_Os01g27360,LOC_Os01g28474,LOC_Os01g33110,LOC_Os01g35170,LOC_Os01g37750,LOC_Os01g43270,LOC_Os01g43280,LOC_Os01g45140,LOC_Os01g45620,LOC_Os01g49240,LOC_Os01g…	3004	2380	32072	1.37717	7.29e-05	2.4e-05	3.31e-06
GOTERM_CC	GO:0005618	cell wall	167	5.55925	1.4e-07	LOC_Os01g03530,LOC_Os01g08350,LOC_Os01g10950,LOC_Os01g10960,LOC_Os01g11620,LOC_Os01g11710,LOC_Os01g11730,LOC_Os01g18860,LOC_Os01g20980,LOC_Os01g28450,LOC_Os01g41770,LOC_Os01g41780,LOC_Os01g41930,LOC_Os01g44250,LOC_Os01g46120,LOC_Os01g46380,LOC_Os01g49430,LOC_Os01g53790,LOC_Os01g54620,LOC_Os01g57854,LOC_Os01g58290,LOC_Os01g67240,LOC_Os01g71060,LOC_Os01g71380,LOC_Os01g71860,LOC_Os01g72290,LOC_Os01g…	3004	1137	32072	1.56813	0.000109456	3.37e-05	4.66e-06
GOTERM_BP	GO:0006468	protein phosphorylation	203	6.75766	1.43e-07	LOC_Os01g02310,LOC_Os01g02370,LOC_Os01g02550,LOC_Os01g02560,LOC_Os01g02570,LOC_Os01g02580,LOC_Os01g02730,LOC_Os01g02770,LOC_Os01g02780,LOC_Os01g02790,LOC_Os01g02800,LOC_Os01g02810,LOC_Os01g05980,LOC_Os01g10900,LOC_Os01g12410,LOC_Os01g12420,LOC_Os01g12430,LOC_Os01g12790,LOC_Os01g21960,LOC_Os01g23970,LOC_Os01g26210,LOC_Os01g33110,LOC_Os01g36790,LOC_Os01g45380,LOC_Os01g45620,LOC_Os01g46720,LOC_Os01g…	3004	1451	32072	1.49367	0.000111781	3.37e-05	4.66e-06
GOTERM_MF	GO:0004672	protein kinase activity	199	6.6245	1.65e-07	LOC_Os01g02310,LOC_Os01g02370,LOC_Os01g02550,LOC_Os01g02560,LOC_Os01g02570,LOC_Os01g02580,LOC_Os01g02730,LOC_Os01g02770,LOC_Os01g02780,LOC_Os01g02790,LOC_Os01g02800,LOC_Os01g02810,LOC_Os01g05980,LOC_Os01g10900,LOC_Os01g12420,LOC_Os01g12430,LOC_Os01g12790,LOC_Os01g21960,LOC_Os01g23970,LOC_Os01g26210,LOC_Os01g33110,LOC_Os01g36790,LOC_Os01g45380,LOC_Os01g45620,LOC_Os01g46720,LOC_Os01g53840,LOC_Os01g…	3004	1419	32072	1.49726	0.000129037	3.63e-05	5.02e-06
GOTERM_MF	GO:0004713	protein tyrosine kinase activity	187	6.22503	1.67e-07	LOC_Os01g02310,LOC_Os01g02550,LOC_Os01g02560,LOC_Os01g02570,LOC_Os01g02580,LOC_Os01g02730,LOC_Os01g02770,LOC_Os01g02780,LOC_Os01g02790,LOC_Os01g02800,LOC_Os01g02810,LOC_Os01g05980,LOC_Os01g10900,LOC_Os01g12420,LOC_Os01g12430,LOC_Os01g12790,LOC_Os01g21960,LOC_Os01g23970,LOC_Os01g26210,LOC_Os01g33110,LOC_Os01g36790,LOC_Os01g45380,LOC_Os01g45620,LOC_Os01g53840,LOC_Os01g55450,LOC_Os01g57510,LOC_Os01g…	3004	1314	32072	1.5194	0.000130582	3.63e-05	5.02e-06
GOTERM_BP	GO:0006810	transport	328	10.9188	1.92e-07	LOC_Os01g01350,LOC_Os01g02000,LOC_Os01g09660,LOC_Os01g11250,LOC_Os01g12130,LOC_Os01g12680,LOC_Os01g12900,LOC_Os01g13130,LOC_Os01g17214,LOC_Os01g17240,LOC_Os01g20830,LOC_Os01g28600,LOC_Os01g31940,LOC_Os01g31980,LOC_Os01g41910,LOC_Os01g42350,LOC_Os01g42380,LOC_Os01g42410,LOC_Os01g42900,LOC_Os01g43100,LOC_Os01g45750,LOC_Os01g47760,LOC_Os01g48900,LOC_Os01g50100,LOC_Os01g50616,LOC_Os01g55200,LOC_Os01g…	3004	2596	32072	1.34895	0.000149676	4.01e-05	5.54e-06
GOTERM_MF	GO:0004674	protein serine/threonine kinase activity	195	6.49134	2.08e-07	LOC_Os01g02310,LOC_Os01g02370,LOC_Os01g02550,LOC_Os01g02560,LOC_Os01g02570,LOC_Os01g02580,LOC_Os01g02730,LOC_Os01g02770,LOC_Os01g02780,LOC_Os01g02790,LOC_Os01g02800,LOC_Os01g02810,LOC_Os01g05980,LOC_Os01g10900,LOC_Os01g12410,LOC_Os01g12420,LOC_Os01g12430,LOC_Os01g12790,LOC_Os01g21960,LOC_Os01g23970,LOC_Os01g26210,LOC_Os01g33110,LOC_Os01g36790,LOC_Os01g45380,LOC_Os01g45620,LOC_Os01g46720,LOC_Os01g…	3004	1389	32072	1.49885	0.000162618	4.06e-05	5.61e-06
GOTERM_MF	GO:0016705	oxidoreductase activity, acting on paired donors, with incorporation or reduction of molecular oxygen	67	2.23036	2.12e-07	LOC_Os01g12750,LOC_Os01g12760,LOC_Os01g24780,LOC_Os01g27890,LOC_Os01g36294,LOC_Os01g43700,LOC_Os01g72740,LOC_Os02g01890,LOC_Os02g02230,LOC_Os02g12680,LOC_Os02g12690,LOC_Os02g26810,LOC_Os02g38290,LOC_Os03g04190,LOC_Os03g04530,LOC_Os03g04650,LOC_Os03g04660,LOC_Os03g12260,LOC_Os03g14400,LOC_Os03g14560,LOC_Os03g21400,LOC_Os03g25500,LOC_Os03g39760,LOC_Os03g40600,LOC_Os03g40610,LOC_Os04g08824,LOC_Os04g…	3004	335	32072	2.13529	0.000165218	4.06e-05	5.61e-06
GOTERM_MF	GO:0005488	binding	505	16.8109	2.16e-07	LOC_Os01g01660,LOC_Os01g03530,LOC_Os01g08350,LOC_Os01g09660,LOC_Os01g10400,LOC_Os01g12570,LOC_Os01g12750,LOC_Os01g12760,LOC_Os01g15810,LOC_Os01g16030,LOC_Os01g17330,LOC_Os01g19800,LOC_Os01g20830,LOC_Os01g20930,LOC_Os01g22352,LOC_Os01g24780,LOC_Os01g26970,LOC_Os01g27890,LOC_Os01g33869,LOC_Os01g36294,LOC_Os01g38229,LOC_Os01g40680,LOC_Os01g41990,LOC_Os01g43700,LOC_Os01g44360,LOC_Os01g46380,LOC_Os01g…	3004	4287	32072	1.25766	0.000168395	4.06e-05	5.61e-06
GOTERM_CC	GO:0009534	chloroplast thylakoid	33	1.09854	3.19e-07	LOC_Os01g05080,LOC_Os01g18320,LOC_Os01g40310,LOC_Os01g45750,LOC_Os01g67120,LOC_Os02g10390,LOC_Os02g39730,LOC_Os02g49680,LOC_Os02g51080,LOC_Os03g19760,LOC_Os03g56670,LOC_Os03g63950,LOC_Os04g38410,LOC_Os04g43420,LOC_Os04g51792,LOC_Os04g53230,LOC_Os04g54640,LOC_Os05g22614,LOC_Os05g49380,LOC_Os07g07540,LOC_Os07g37030,LOC_Os07g37550,LOC_Os08g06530,LOC_Os08g27010,LOC_Os08g32930,LOC_Os08g33820,LOC_Os08g…	3004	110	32072	3.20293	0.000249091	5.82e-05	8.04e-06
GOTERM_BP	GO:0009719	response to endogenous stimulus	204	6.79095	4.4e-07	LOC_Os01g04800,LOC_Os01g09280,LOC_Os01g10830,LOC_Os01g12160,LOC_Os01g12900,LOC_Os01g14110,LOC_Os01g17330,LOC_Os01g24550,LOC_Os01g28450,LOC_Os01g41900,LOC_Os01g42350,LOC_Os01g42380,LOC_Os01g43440,LOC_Os01g43550,LOC_Os01g43950,LOC_Os01g45620,LOC_Os01g46760,LOC_Os01g47580,LOC_Os01g47760,LOC_Os01g50100,LOC_Os01g63770,LOC_Os01g64790,LOC_Os01g65920,LOC_Os01g67310,LOC_Os02g01355,LOC_Os02g10120,LOC_Os02g…	3004	1486	32072	1.46567	0.000342992	7.76e-05	1.07e-05
GOTERM_CC	GO:0005886	plasma membrane	452	15.0466	5.65e-07	LOC_Os01g01660,LOC_Os01g02000,LOC_Os01g02060,LOC_Os01g06580,LOC_Os01g07890,LOC_Os01g09620,LOC_Os01g09880,LOC_Os01g11250,LOC_Os01g12130,LOC_Os01g12580,LOC_Os01g12640,LOC_Os01g12680,LOC_Os01g12900,LOC_Os01g13140,LOC_Os01g13560,LOC_Os01g16030,LOC_Os01g18050,LOC_Os01g18860,LOC_Os01g19610,LOC_Os01g21960,LOC_Os01g24820,LOC_Os01g26210,LOC_Os01g31980,LOC_Os01g33110,LOC_Os01g33810,LOC_Os01g34690,LOC_Os01g…	3004	3811	32072	1.26627	0.000441013	9.67e-05	1.34e-05
GOTERM_CC	GO:0005576	extracellular region	133	4.42743	8.97e-07	LOC_Os01g01660,LOC_Os01g03340,LOC_Os01g03390,LOC_Os01g04050,LOC_Os01g10470,LOC_Os01g10490,LOC_Os01g12070,LOC_Os01g15320,LOC_Os01g19170,LOC_Os01g28450,LOC_Os01g28600,LOC_Os01g46380,LOC_Os01g49430,LOC_Os01g54470,LOC_Os01g55350,LOC_Os01g58290,LOC_Os01g61160,LOC_Os01g72290,LOC_Os02g01150,LOC_Os02g01340,LOC_Os02g03120,LOC_Os02g14430,LOC_Os02g14460,LOC_Os02g16730,LOC_Os02g21009,LOC_Os02g32980,LOC_Os02g…	3004	883	32072	1.60811	0.000699976	0.000148995	2.06e-05
GOTERM_MF	GO:0004553	hydrolase activity, hydrolyzing O-glycosyl compounds	61	2.03063	9.27e-07	LOC_Os01g12070,LOC_Os01g64110,LOC_Os01g70520,LOC_Os01g71380,LOC_Os01g71700,LOC_Os01g71860,LOC_Os02g03120,LOC_Os02g16270,LOC_Os02g51620,LOC_Os03g11420,LOC_Os03g12140,LOC_Os03g25790,LOC_Os03g27980,LOC_Os03g49600,LOC_Os03g52630,LOC_Os03g53860,LOC_Os03g63760,LOC_Os04g27980,LOC_Os04g39864,LOC_Os04g39880,LOC_Os04g43360,LOC_Os04g44840,LOC_Os04g56930,LOC_Os05g30250,LOC_Os05g32710,LOC_Os05g34320,LOC_Os06g…	3004	307	32072	2.12138	0.000723191	0.000149538	2.07e-05
GOTERM_MF	GO:0043565	sequence-specific DNA binding	80	2.66312	1.7e-06	LOC_Os01g09080,LOC_Os01g10504,LOC_Os01g36220,LOC_Os01g39020,LOC_Os01g43550,LOC_Os01g53040,LOC_Os01g55150,LOC_Os01g58760,LOC_Os01g64020,LOC_Os01g64730,LOC_Os01g66030,LOC_Os01g66290,LOC_Os01g74140,LOC_Os02g10140,LOC_Os02g13310,LOC_Os02g14910,LOC_Os02g16540,LOC_Os02g43330,LOC_Os02g47060,LOC_Os02g49560,LOC_Os02g49840,LOC_Os02g53100,LOC_Os03g03100,LOC_Os03g06630,LOC_Os03g07450,LOC_Os03g10210,LOC_Os03g…	3004	459	32072	1.86082	0.00132933	0.000267237	3.69e-05
GOTERM_MF	GO:0004497	monooxygenase activity	69	2.29694	1.87e-06	LOC_Os01g12750,LOC_Os01g12760,LOC_Os01g24780,LOC_Os01g27890,LOC_Os01g36294,LOC_Os01g43700,LOC_Os01g53200,LOC_Os01g72740,LOC_Os02g01890,LOC_Os02g02230,LOC_Os02g12680,LOC_Os02g12690,LOC_Os02g26810,LOC_Os02g38290,LOC_Os02g51080,LOC_Os03g04190,LOC_Os03g04530,LOC_Os03g04650,LOC_Os03g04660,LOC_Os03g12260,LOC_Os03g14400,LOC_Os03g14560,LOC_Os03g21400,LOC_Os03g25500,LOC_Os03g39760,LOC_Os03g40600,LOC_Os03g…	3004	375	32072	1.96446	0.00145517	0.00028463	3.93e-05
GOTERM_MF	GO:0016757	transferase activity, transferring glycosyl groups	76	2.52996	2.52e-06	LOC_Os01g02900,LOC_Os01g02940,LOC_Os01g08110,LOC_Os01g43270,LOC_Os01g43280,LOC_Os01g45140,LOC_Os01g49240,LOC_Os01g53370,LOC_Os01g54620,LOC_Os01g59100,LOC_Os01g70180,LOC_Os01g70200,LOC_Os02g09930,LOC_Os02g35020,LOC_Os02g35870,LOC_Os02g37690,LOC_Os02g42280,LOC_Os02g50600,LOC_Os02g51060,LOC_Os02g51900,LOC_Os02g51910,LOC_Os02g52590,LOC_Os02g52630,LOC_Os02g52640,LOC_Os02g57090,LOC_Os03g05180,LOC_Os03g…	3004	433	32072	1.87392	0.0019636	0.00037397	5.17e-05
GOTERM_MF	GO:0016772	transferase activity, transferring phosphorus-containing groups	195	6.49134	2.88e-06	LOC_Os01g02310,LOC_Os01g02370,LOC_Os01g02550,LOC_Os01g02560,LOC_Os01g02570,LOC_Os01g02580,LOC_Os01g02770,LOC_Os01g02780,LOC_Os01g02790,LOC_Os01g02800,LOC_Os01g02810,LOC_Os01g05980,LOC_Os01g10900,LOC_Os01g12420,LOC_Os01g12430,LOC_Os01g12790,LOC_Os01g21960,LOC_Os01g23970,LOC_Os01g26210,LOC_Os01g33110,LOC_Os01g36790,LOC_Os01g45380,LOC_Os01g45620,LOC_Os01g46720,LOC_Os01g53840,LOC_Os01g55450,LOC_Os01g…	3004	1452	32072	1.43382	0.00224925	0.000417389	5.77e-05
GOTERM_MF	GO:0043169	cation binding	42	1.39814	5.52e-06	LOC_Os01g70520,LOC_Os01g71380,LOC_Os02g52700,LOC_Os03g11420,LOC_Os03g12140,LOC_Os03g22790,LOC_Os03g25790,LOC_Os03g27980,LOC_Os03g49600,LOC_Os04g27980,LOC_Os04g39864,LOC_Os04g39880,LOC_Os04g43360,LOC_Os05g30250,LOC_Os05g32710,LOC_Os05g34320,LOC_Os07g13580,LOC_Os07g35510,LOC_Os07g35560,LOC_Os07g38930,LOC_Os07g43820,LOC_Os07g46280,LOC_Os07g46790,LOC_Os08g36910,LOC_Os08g39860,LOC_Os08g39870,LOC_Os08g…	3004	189	32072	2.37254	0.00430839	0.000779512	0.00010771
GOTERM_MF	GO:0019825	oxygen binding	64	2.13049	5.82e-06	LOC_Os01g12750,LOC_Os01g12760,LOC_Os01g24780,LOC_Os01g27890,LOC_Os01g36294,LOC_Os01g43700,LOC_Os01g72260,LOC_Os01g72270,LOC_Os01g72740,LOC_Os02g01890,LOC_Os02g02230,LOC_Os02g12680,LOC_Os02g12690,LOC_Os02g38290,LOC_Os03g04190,LOC_Os03g12260,LOC_Os03g12510,LOC_Os03g14560,LOC_Os03g21400,LOC_Os03g25500,LOC_Os03g39760,LOC_Os03g40600,LOC_Os03g40610,LOC_Os04g08824,LOC_Os04g08828,LOC_Os04g09430,LOC_Os04g…	3004	351	32072	1.9467	0.0045361	0.000800694	0.000110637
GOTERM_CC	GO:0016021	integral component of membrane	286	9.52064	6.09e-06	LOC_Os01g02000,LOC_Os01g05980,LOC_Os01g10900,LOC_Os01g11250,LOC_Os01g12130,LOC_Os01g12680,LOC_Os01g12790,LOC_Os01g13130,LOC_Os01g13560,LOC_Os01g17214,LOC_Os01g17240,LOC_Os01g20780,LOC_Os01g31940,LOC_Os01g33110,LOC_Os01g42350,LOC_Os01g42380,LOC_Os01g42410,LOC_Os01g45750,LOC_Os01g47635,LOC_Os01g50100,LOC_Os01g52610,LOC_Os01g53930,LOC_Os01g54620,LOC_Os01g55200,LOC_Os01g56420,LOC_Os01g57004,LOC_Os01g…	3004	2313	32072	1.32013	0.0047524	0.000818901	0.000113152
GOTERM_MF	GO:0016301	kinase activity	268	8.92144	7.75e-06	LOC_Os01g02310,LOC_Os01g02370,LOC_Os01g02420,LOC_Os01g02550,LOC_Os01g02560,LOC_Os01g02570,LOC_Os01g02580,LOC_Os01g02730,LOC_Os01g02750,LOC_Os01g02770,LOC_Os01g02780,LOC_Os01g02790,LOC_Os01g02800,LOC_Os01g02810,LOC_Os01g05980,LOC_Os01g06730,LOC_Os01g06870,LOC_Os01g10900,LOC_Os01g12410,LOC_Os01g12420,LOC_Os01g12430,LOC_Os01g12790,LOC_Os01g21960,LOC_Os01g23970,LOC_Os01g26210,LOC_Os01g33110,LOC_Os01g…	3004	2152	32072	1.32959	0.00604417	0.00101727	0.000140562
GOTERM_BP	GO:0015979	photosynthesis	56	1.86418	8.6e-06	LOC_Os01g05080,LOC_Os01g17170,LOC_Os01g52170,LOC_Os01g57962,LOC_Os01g58049,LOC_Os01g65902,LOC_Os02g01150,LOC_Os02g01340,LOC_Os02g10390,LOC_Os02g24574,LOC_Os02g49680,LOC_Os02g51080,LOC_Os03g03720,LOC_Os03g16050,LOC_Os03g20700,LOC_Os03g39610,LOC_Os03g56670,LOC_Os03g64020,LOC_Os04g16770,LOC_Os04g16872,LOC_Os04g16874,LOC_Os04g33830,LOC_Os04g38410,LOC_Os04g38600,LOC_Os04g58200,LOC_Os05g05480,LOC_Os05g…	3004	295	32072	2.02671	0.0067077	0.00110329	0.000152448
GOTERM_CC	GO:0048046	apoplast	61	2.03063	1.49e-05	LOC_Os01g46380,LOC_Os01g55350,LOC_Os01g61160,LOC_Os01g71380,LOC_Os01g72290,LOC_Os02g01150,LOC_Os02g01340,LOC_Os02g32980,LOC_Os02g41590,LOC_Os02g42350,LOC_Os02g47020,LOC_Os02g51440,LOC_Os02g52700,LOC_Os03g03720,LOC_Os03g11420,LOC_Os03g16050,LOC_Os03g16610,LOC_Os03g20420,LOC_Os03g44880,LOC_Os03g63760,LOC_Os04g38600,LOC_Os04g41340,LOC_Os04g41620,LOC_Os04g41680,LOC_Os04g53230,LOC_Os04g56400,LOC_Os04g…	3004	340	32072	1.91548	0.011646	0.00187298	0.000258801
GOTERM_BP	GO:0009875	pollen-pistil interaction	28	0.932091	3.03e-05	LOC_Os01g12410,LOC_Os01g12420,LOC_Os01g12430,LOC_Os01g47810,LOC_Os01g57510,LOC_Os01g65010,LOC_Os01g65030,LOC_Os02g02210,LOC_Os02g32620,LOC_Os04g12080,LOC_Os04g34250,LOC_Os04g34270,LOC_Os04g34290,LOC_Os04g34320,LOC_Os04g34390,LOC_Os04g42740,LOC_Os04g52440,LOC_Os04g54020,LOC_Os04g54070,LOC_Os04g54110,LOC_Os04g54140,LOC_Os05g42210,LOC_Os07g36544,LOC_Os09g37880,LOC_Os11g05240,LOC_Os11g10290,LOC_Os12g…	3004	109	32072	2.74257	0.0236633	0.00372293	0.00051442
GOTERM_BP	GO:0080167	response to karrikin	31	1.03196	4.03e-05	LOC_Os01g03530,LOC_Os01g17214,LOC_Os01g64960,LOC_Os03g08360,LOC_Os03g16950,LOC_Os03g18030,LOC_Os03g63970,LOC_Os04g24140,LOC_Os04g56930,LOC_Os07g07420,LOC_Os07g28480,LOC_Os07g33310,LOC_Os07g37030,LOC_Os08g01380,LOC_Os08g33820,LOC_Os09g08072,LOC_Os09g34214,LOC_Os09g34230,LOC_Os09g34250,LOC_Os10g38189,LOC_Os10g38360,LOC_Os10g38489,LOC_Os10g38590,LOC_Os10g38670,LOC_Os10g38700,LOC_Os10g38730,LOC_Os11g…	3004	131	32072	2.52648	0.0314136	0.00483713	0.000668375
GOTERM_MF	GO:0008422	beta-glucosidase activity	13	0.432756	6.6e-05	LOC_Os01g70520,LOC_Os03g11420,LOC_Os03g49600,LOC_Os04g39864,LOC_Os04g39880,LOC_Os05g30250,LOC_Os07g46280,LOC_Os08g39860,LOC_Os08g39870,LOC_Os09g31410,LOC_Os09g31430,LOC_Os10g17650,LOC_Os12g23170	3004	27	32072	5.1405	0.0514661	0.00775974	0.00107221
GOTERM_BP	GO:0009637	response to blue light	18	0.599201	9.57e-05	LOC_Os02g01150,LOC_Os02g39160,LOC_Os02g49680,LOC_Os03g03720,LOC_Os03g16050,LOC_Os03g39610,LOC_Os04g36062,LOC_Os04g56400,LOC_Os05g22614,LOC_Os06g44970,LOC_Os07g37240,LOC_Os08g06530,LOC_Os08g40160,LOC_Os08g44000,LOC_Os08g45030,LOC_Os08g45190,LOC_Os09g32440,LOC_Os11g13890	3004	55	32072	3.4941	0.074652	0.0110259	0.00152351
GOTERM_BP	GO:0009416	response to light stimulus	27	0.898802	0.00011923	LOC_Os01g12160,LOC_Os02g02840,LOC_Os02g39160,LOC_Os02g49680,LOC_Os02g56860,LOC_Os03g03720,LOC_Os03g08360,LOC_Os03g10880,LOC_Os03g12030,LOC_Os03g14170,LOC_Os03g26530,LOC_Os03g31750,LOC_Os04g38600,LOC_Os04g49570,LOC_Os05g05180,LOC_Os06g06050,LOC_Os07g36230,LOC_Os08g01380,LOC_Os08g06630,LOC_Os08g29170,LOC_Os08g34150,LOC_Os09g09370,LOC_Os10g35840,LOC_Os11g32520,LOC_Os11g47970,LOC_Os12g03150,LOC_Os12g…	3004	113	32072	2.55101	0.0929997	0.0134611	0.00185999
GOTERM_MF	GO:0004568	chitinase activity	15	0.499334	0.000133886	LOC_Os01g64110,LOC_Os04g41620,LOC_Os04g41680,LOC_Os06g51050,LOC_Os06g51060,LOC_Os08g40690,LOC_Os09g32080,LOC_Os10g28080,LOC_Os10g39680,LOC_Os10g39700,LOC_Os11g37940,LOC_Os11g37970,LOC_Os11g47530,LOC_Os11g47550,LOC_Os11g47590	3004	40	32072	4.00366	0.104431	0.0148193	0.00204767
GOTERM_MF	GO:0016787	hydrolase activity	357	11.8842	0.000190252	LOC_Os01g04290,LOC_Os01g06220,LOC_Os01g06740,LOC_Os01g07090,LOC_Os01g11620,LOC_Os01g11700,LOC_Os01g11710,LOC_Os01g11730,LOC_Os01g12070,LOC_Os01g12320,LOC_Os01g12900,LOC_Os01g12920,LOC_Os01g19170,LOC_Os01g20970,LOC_Os01g20980,LOC_Os01g22640,LOC_Os01g22660,LOC_Os01g22980,LOC_Os01g24550,LOC_Os01g24560,LOC_Os01g25360,LOC_Os01g37630,LOC_Os01g37910,LOC_Os01g40630,LOC_Os01g42320,LOC_Os01g42350,LOC_Os01g…	3004	3131	32072	1.21734	0.148397	0.0201664	0.00278651
GOTERM_MF	GO:0016798	hydrolase activity, acting on glycosyl bonds	43	1.43142	0.000192839	LOC_Os01g12070,LOC_Os01g19170,LOC_Os01g64110,LOC_Os01g70520,LOC_Os01g71380,LOC_Os01g71860,LOC_Os02g03120,LOC_Os02g54030,LOC_Os02g55870,LOC_Os03g11320,LOC_Os03g11420,LOC_Os03g27980,LOC_Os03g49600,LOC_Os03g52630,LOC_Os04g27980,LOC_Os04g39864,LOC_Os04g39880,LOC_Os04g41620,LOC_Os04g41680,LOC_Os04g56930,LOC_Os05g30250,LOC_Os05g34320,LOC_Os06g50140,LOC_Os06g51050,LOC_Os06g51060,LOC_Os07g46280,LOC_Os08g…	3004	234	32072	1.96191	0.150415	0.0201664	0.00278651
GOTERM_CC	GO:0010287	plastoglobule	18	0.599201	0.000194137	LOC_Os01g26000,LOC_Os01g57962,LOC_Os02g10390,LOC_Os02g12680,LOC_Os02g12690,LOC_Os02g33020,LOC_Os03g39610,LOC_Os03g56670,LOC_Os04g38410,LOC_Os04g54790,LOC_Os07g25430,LOC_Os07g37240,LOC_Os08g31750,LOC_Os08g33820,LOC_Os08g44680,LOC_Os11g13890,LOC_Os11g47970,LOC_Os12g23200	3004	59	32072	3.25722	0.151427	0.0201664	0.00278651
GOTERM_MF	GO:0003700	sequence-specific DNA binding transcription factor activity	227	7.55659	0.000196485	LOC_Os01g02110,LOC_Os01g04750,LOC_Os01g04800,LOC_Os01g09080,LOC_Os01g09280,LOC_Os01g09620,LOC_Os01g09930,LOC_Os01g09990,LOC_Os01g10504,LOC_Os01g11910,LOC_Os01g12860,LOC_Os01g14110,LOC_Os01g15900,LOC_Os01g16810,LOC_Os01g34060,LOC_Os01g36220,LOC_Os01g39020,LOC_Os01g39330,LOC_Os01g41900,LOC_Os01g43550,LOC_Os01g43950,LOC_Os01g47370,LOC_Os01g53040,LOC_Os01g55150,LOC_Os01g57650,LOC_Os01g58760,LOC_Os01g…	3004	1877	32072	1.29118	0.153258	0.0201664	0.00278651
GOTERM_BP	GO:0006091	generation of precursor metabolites and energy	55	1.83089	0.000200656	LOC_Os01g02050,LOC_Os01g11700,LOC_Os01g22640,LOC_Os01g22660,LOC_Os01g46120,LOC_Os01g55350,LOC_Os01g57962,LOC_Os01g58049,LOC_Os01g63220,LOC_Os01g65902,LOC_Os02g01340,LOC_Os02g10390,LOC_Os03g03720,LOC_Os03g16050,LOC_Os03g38950,LOC_Os03g39610,LOC_Os03g64020,LOC_Os04g16770,LOC_Os04g16872,LOC_Os04g16874,LOC_Os04g33830,LOC_Os04g38600,LOC_Os05g05480,LOC_Os05g06720,LOC_Os05g32710,LOC_Os05g41640,LOC_Os05g…	3004	329	32072	1.78481	0.156512	0.0202268	0.00279485
GOTERM_BP	GO:0006464	cellular protein modification process	335	11.1518	0.000208012	LOC_Os01g02310,LOC_Os01g02420,LOC_Os01g02550,LOC_Os01g02560,LOC_Os01g02570,LOC_Os01g02580,LOC_Os01g02730,LOC_Os01g02750,LOC_Os01g02770,LOC_Os01g02780,LOC_Os01g02790,LOC_Os01g02800,LOC_Os01g02810,LOC_Os01g05980,LOC_Os01g10900,LOC_Os01g12160,LOC_Os01g12410,LOC_Os01g12420,LOC_Os01g12430,LOC_Os01g12790,LOC_Os01g13480,LOC_Os01g16030,LOC_Os01g16860,LOC_Os01g19880,LOC_Os01g21960,LOC_Os01g23970,LOC_Os01g…	3004	2920	32072	1.22486	0.162249	0.0206004	0.00284648
GOTERM_BP	GO:0031408	oxylipin biosynthetic process	14	0.466045	0.000223392	LOC_Os01g27240,LOC_Os02g10120,LOC_Os02g12680,LOC_Os02g12690,LOC_Os02g39160,LOC_Os02g49680,LOC_Os03g03720,LOC_Os03g49380,LOC_Os03g52860,LOC_Os04g43200,LOC_Os05g23880,LOC_Os06g11210,LOC_Os08g29170,LOC_Os11g36719	3004	37	32072	4.03973	0.174246	0.0216868	0.00299659
GOTERM_CC	GO:0009507	chloroplast	213	7.09055	0.000229287	LOC_Os01g02060,LOC_Os01g03040,LOC_Os01g05080,LOC_Os01g07090,LOC_Os01g12160,LOC_Os01g17170,LOC_Os01g17240,LOC_Os01g18320,LOC_Os01g21990,LOC_Os01g26000,LOC_Os01g26970,LOC_Os01g31980,LOC_Os01g40310,LOC_Os01g40580,LOC_Os01g45750,LOC_Os01g46380,LOC_Os01g46720,LOC_Os01g52170,LOC_Os01g53020,LOC_Os01g53900,LOC_Os01g53930,LOC_Os01g57958,LOC_Os01g57962,LOC_Os01g58049,LOC_Os01g60280,LOC_Os01g62230,LOC_Os01g…	3004	1750	32072	1.29947	0.178844	0.0216868	0.00299659
GOTERM_CC	GO:0005773	vacuole	176	5.85885	0.000230507	LOC_Os01g07250,LOC_Os01g10950,LOC_Os01g10960,LOC_Os01g11700,LOC_Os01g11710,LOC_Os01g12160,LOC_Os01g13130,LOC_Os01g16030,LOC_Os01g19820,LOC_Os01g24550,LOC_Os01g27120,LOC_Os01g37910,LOC_Os01g40580,LOC_Os01g42350,LOC_Os01g42380,LOC_Os01g47410,LOC_Os01g48900,LOC_Os01g49430,LOC_Os01g53900,LOC_Os01g53930,LOC_Os01g57510,LOC_Os01g57854,LOC_Os01g59530,LOC_Os01g67190,LOC_Os01g71380,LOC_Os01g71860,LOC_Os01g…	3004	1403	32072	1.33931	0.179795	0.0216868	0.00299659
GOTERM_MF	GO:0016758	transferase activity, transferring hexosyl groups	37	1.23169	0.000307535	LOC_Os01g08110,LOC_Os01g43270,LOC_Os01g43280,LOC_Os01g45140,LOC_Os01g49240,LOC_Os01g53370,LOC_Os01g59100,LOC_Os02g37690,LOC_Os02g42280,LOC_Os02g51900,LOC_Os02g51910,LOC_Os03g19310,LOC_Os03g55010,LOC_Os03g55040,LOC_Os03g59030,LOC_Os04g12960,LOC_Os04g24110,LOC_Os04g37820,LOC_Os04g42690,LOC_Os04g44354,LOC_Os04g46970,LOC_Os05g08750,LOC_Os05g45200,LOC_Os05g47950,LOC_Os06g16000,LOC_Os06g18670,LOC_Os07g…	3004	194	32072	2.03623	0.239877	0.0284595	0.00393242
GOTERM_BP	GO:0009624	response to nematode	24	0.798935	0.000412316	LOC_Os01g17214,LOC_Os01g61940,LOC_Os01g65100,LOC_Os01g65110,LOC_Os02g13560,LOC_Os02g21009,LOC_Os03g04570,LOC_Os03g11010,LOC_Os03g17350,LOC_Os03g17370,LOC_Os03g39710,LOC_Os03g60260,LOC_Os04g13210,LOC_Os04g49890,LOC_Os04g51330,LOC_Os04g51610,LOC_Os05g27010,LOC_Os06g29844,LOC_Os06g38294,LOC_Os10g11860,LOC_Os10g20470,LOC_Os11g04020,LOC_Os11g04104,LOC_Os11g05690	3004	103	32072	2.48771	0.321607	0.0375406	0.00518721
GOTERM_BP	GO:0015995	chlorophyll biosynthetic process	20	0.665779	0.000449708	LOC_Os01g05080,LOC_Os01g17170,LOC_Os01g18320,LOC_Os01g52170,LOC_Os02g39160,LOC_Os02g51080,LOC_Os03g03720,LOC_Os03g16050,LOC_Os03g20700,LOC_Os04g58200,LOC_Os05g22614,LOC_Os05g33840,LOC_Os08g29170,LOC_Os08g40160,LOC_Os10g35370,LOC_Os10g35644,LOC_Os10g35840,LOC_Os10g39930,LOC_Os10g41780,LOC_Os11g16550	3004	77	32072	2.7731	0.350772	0.0402951	0.00556781
GOTERM_MF	GO:0005524	ATP binding	361	12.0173	0.000517533	LOC_Os01g02310,LOC_Os01g02370,LOC_Os01g02550,LOC_Os01g02560,LOC_Os01g02570,LOC_Os01g02580,LOC_Os01g02730,LOC_Os01g02770,LOC_Os01g02780,LOC_Os01g02790,LOC_Os01g02800,LOC_Os01g02810,LOC_Os01g05980,LOC_Os01g07150,LOC_Os01g10900,LOC_Os01g12410,LOC_Os01g12420,LOC_Os01g12430,LOC_Os01g12790,LOC_Os01g13570,LOC_Os01g18860,LOC_Os01g21960,LOC_Os01g23970,LOC_Os01g24820,LOC_Os01g25740,LOC_Os01g26210,LOC_Os01g…	3004	3219	32072	1.19733	0.403676	0.0456479	0.00630744
GOTERM_BP	GO:0010114	response to red light	16	0.532623	0.000529992	LOC_Os02g01150,LOC_Os02g39160,LOC_Os02g47744,LOC_Os02g49680,LOC_Os02g58350,LOC_Os03g03720,LOC_Os03g16050,LOC_Os03g39610,LOC_Os04g56400,LOC_Os05g22614,LOC_Os07g37240,LOC_Os08g06530,LOC_Os08g40160,LOC_Os08g44000,LOC_Os08g45190,LOC_Os11g13890	3004	53	32072	3.22307	0.413393	0.0460276	0.0063599
GOTERM_MF	GO:0016747	transferase activity, transferring acyl groups other than amino-acyl groups	34	1.13182	0.000589961	LOC_Os01g02020,LOC_Os01g08380,LOC_Os01g24790,LOC_Os01g26000,LOC_Os01g28474,LOC_Os01g63480,LOC_Os02g49920,LOC_Os02g56860,LOC_Os03g08360,LOC_Os03g12030,LOC_Os03g14170,LOC_Os03g26530,LOC_Os03g45740,LOC_Os04g09260,LOC_Os04g51660,LOC_Os06g01350,LOC_Os06g05320,LOC_Os06g05750,LOC_Os06g05790,LOC_Os06g08640,LOC_Os06g48560,LOC_Os07g04970,LOC_Os07g23150,LOC_Os07g31770,LOC_Os07g34260,LOC_Os07g36560,LOC_Os07g…	3004	179	32072	2.02793	0.460169	0.0504593	0.00697226
GOTERM_BP	GO:0016117	carotenoid biosynthetic process	19	0.63249	0.000632379	LOC_Os01g05080,LOC_Os01g52170,LOC_Os01g67120,LOC_Os02g35090,LOC_Os02g38020,LOC_Os02g39160,LOC_Os03g16050,LOC_Os03g19760,LOC_Os03g55970,LOC_Os04g53230,LOC_Os05g22614,LOC_Os05g47850,LOC_Os07g07540,LOC_Os08g14450,LOC_Os08g29170,LOC_Os08g44000,LOC_Os09g38320,LOC_Os10g39930,LOC_Os11g16550	3004	73	32072	2.7788	0.493256	0.0527405	0.00728747
GOTERM_BP	GO:0048544	recognition of pollen	22	0.732357	0.000635318	LOC_Os01g12420,LOC_Os01g12430,LOC_Os01g57510,LOC_Os01g65030,LOC_Os02g32620,LOC_Os04g34250,LOC_Os04g34270,LOC_Os04g34290,LOC_Os04g34320,LOC_Os04g34390,LOC_Os04g42740,LOC_Os04g54002,LOC_Os04g54070,LOC_Os04g54110,LOC_Os04g54140,LOC_Os05g42210,LOC_Os07g36544,LOC_Os09g37790,LOC_Os09g37880,LOC_Os11g05240,LOC_Os11g10290,LOC_Os12g15550	3004	93	32072	2.52561	0.495548	0.0527405	0.00728747
GOTERM_BP	GO:0016998	cell wall macromolecule catabolic process	15	0.499334	0.000742794	LOC_Os01g53840,LOC_Os03g02685,LOC_Os04g41620,LOC_Os04g41680,LOC_Os06g41980,LOC_Os06g51050,LOC_Os06g51060,LOC_Os09g21210,LOC_Os09g32080,LOC_Os10g38040,LOC_Os10g39680,LOC_Os10g39700,LOC_Os11g35330,LOC_Os11g37940,LOC_Os11g37970	3004	49	32072	3.2683	0.579379	0.0599008	0.00827685
GOTERM_BP	GO:0000272	polysaccharide catabolic process	15	0.499334	0.000742794	LOC_Os01g12070,LOC_Os02g03120,LOC_Os03g22790,LOC_Os03g52630,LOC_Os04g41620,LOC_Os04g41680,LOC_Os06g50140,LOC_Os06g51050,LOC_Os06g51060,LOC_Os07g46790,LOC_Os08g02220,LOC_Os09g36350,LOC_Os10g28600,LOC_Os10g39680,LOC_Os10g41550	3004	49	32072	3.2683	0.579379	0.0599008	0.00827685
GOTERM_MF	GO:0005509	calcium ion binding	70	2.33023	0.000779897	LOC_Os01g22249,LOC_Os01g22352,LOC_Os01g26210,LOC_Os01g41990,LOC_Os01g55150,LOC_Os01g56030,LOC_Os01g57730,LOC_Os01g59530,LOC_Os01g61880,LOC_Os01g73200,LOC_Os02g10470,LOC_Os02g14430,LOC_Os02g21009,LOC_Os02g41500,LOC_Os02g52700,LOC_Os03g02740,LOC_Os03g02939,LOC_Os03g06580,LOC_Os03g13210,LOC_Os03g14590,LOC_Os03g42020,LOC_Os03g55420,LOC_Os03g59770,LOC_Os04g03830,LOC_Os04g14304,LOC_Os04g29960,LOC_Os04g…	3004	478	32072	1.56349	0.60832	0.0620071	0.00856788
GOTERM_BP	GO:0010218	response to far red light	15	0.499334	0.000876856	LOC_Os02g01150,LOC_Os02g39160,LOC_Os02g49680,LOC_Os03g03720,LOC_Os03g16050,LOC_Os03g39610,LOC_Os04g56400,LOC_Os05g22614,LOC_Os06g51310,LOC_Os07g37240,LOC_Os08g06530,LOC_Os08g40160,LOC_Os08g44000,LOC_Os08g45190,LOC_Os11g13890	3004	50	32072	3.20293	0.683948	0.0687477	0.00949928
GOTERM_BP	GO:0051501	diterpene phytoalexin metabolic process	7	0.233023	0.000994251	LOC_Os01g14630,LOC_Os02g36140,LOC_Os02g36220,LOC_Os02g36264,LOC_Os04g10060,LOC_Os11g28530,LOC_Os12g30824	3004	9	32072	8.30389	0.775516	0.0768839	0.0106235
GOTERM_BP	GO:0006629	lipid metabolic process	131	4.36085	0.00104001	LOC_Os01g07250,LOC_Os01g10830,LOC_Os01g11620,LOC_Os01g11700,LOC_Os01g11710,LOC_Os01g11730,LOC_Os01g12160,LOC_Os01g12320,LOC_Os01g14630,LOC_Os01g22640,LOC_Os01g22660,LOC_Os01g22920,LOC_Os01g27240,LOC_Os01g46120,LOC_Os01g46130,LOC_Os01g47410,LOC_Os01g50030,LOC_Os01g50032,LOC_Os01g54470,LOC_Os01g54620,LOC_Os01g57770,LOC_Os01g67310,LOC_Os02g01980,LOC_Os02g02230,LOC_Os02g02930,LOC_Os02g03720,LOC_Os02g…	3004	1033	32072	1.35393	0.811205	0.0793353	0.0109622
GOTERM_BP	GO:0016310	phosphorylation	146	4.86019	0.00109134	LOC_Os01g02370,LOC_Os01g02550,LOC_Os01g02560,LOC_Os01g02570,LOC_Os01g02580,LOC_Os01g02770,LOC_Os01g02780,LOC_Os01g02800,LOC_Os01g02810,LOC_Os01g10900,LOC_Os01g12420,LOC_Os01g12430,LOC_Os01g21960,LOC_Os01g23970,LOC_Os01g33110,LOC_Os01g36790,LOC_Os01g45380,LOC_Os01g45620,LOC_Os01g53930,LOC_Os01g55450,LOC_Os01g57510,LOC_Os01g59570,LOC_Os01g60280,LOC_Os01g63220,LOC_Os01g65650,LOC_Os01g66860,LOC_Os02g…	3004	1174	32072	1.32773	0.851245	0.0812877	0.011232
GOTERM_BP	GO:0009765	photosynthesis, light harvesting	9	0.299601	0.0010944	LOC_Os01g64960,LOC_Os02g10390,LOC_Os03g39610,LOC_Os04g38410,LOC_Os07g37240,LOC_Os07g37550,LOC_Os07g38960,LOC_Os08g33820,LOC_Os11g13890	3004	18	32072	5.33822	0.853632	0.0812877	0.011232
GOTERM_BP	GO:0070838	divalent metal ion transport	10	0.332889	0.00111087	LOC_Os01g01340,LOC_Os01g40310,LOC_Os03g16050,LOC_Os04g33830,LOC_Os04g51792,LOC_Os05g01950,LOC_Os08g33820,LOC_Os08g39300,LOC_Os10g32700,LOC_Os12g23200	3004	23	32072	4.64193	0.866476	0.0814392	0.0112529
GOTERM_BP	GO:0009409	response to cold	43	1.43142	0.00134198	LOC_Os01g05080,LOC_Os01g18860,LOC_Os01g53900,LOC_Os01g64110,LOC_Os01g71380,LOC_Os02g03060,LOC_Os02g25060,LOC_Os02g39160,LOC_Os02g47020,LOC_Os02g56860,LOC_Os03g03720,LOC_Os03g08360,LOC_Os03g12030,LOC_Os03g14170,LOC_Os03g16050,LOC_Os03g16170,LOC_Os03g18960,LOC_Os03g20120,LOC_Os03g25460,LOC_Os03g26530,LOC_Os04g27980,LOC_Os04g38600,LOC_Os04g43200,LOC_Os04g56400,LOC_Os05g07810,LOC_Os05g32320,LOC_Os05g…	3004	261	32072	1.75895	1	0.0971215	0.0134198
GOTERM_BP	GO:0043085	positive regulation of catalytic activity	16	0.532623	0.00154253	LOC_Os01g05080,LOC_Os01g45750,LOC_Os01g48300,LOC_Os01g52170,LOC_Os01g67120,LOC_Os02g49680,LOC_Os03g16050,LOC_Os03g55970,LOC_Os04g36062,LOC_Os04g57930,LOC_Os05g01950,LOC_Os05g32710,LOC_Os06g09880,LOC_Os07g46790,LOC_Os09g36040,LOC_Os11g16550	3004	60	32072	2.84705	1	0.110222	0.01523
GOTERM_MF	GO:0022857	transmembrane transporter activity	20	0.665779	0.00176149	LOC_Os02g13560,LOC_Os02g36414,LOC_Os02g36440,LOC_Os03g03680,LOC_Os03g04360,LOC_Os03g05620,LOC_Os03g10090,LOC_Os03g11900,LOC_Os03g39710,LOC_Os04g37970,LOC_Os04g38220,LOC_Os07g10590,LOC_Os07g37454,LOC_Os07g39360,LOC_Os08g45000,LOC_Os10g21590,LOC_Os10g40950,LOC_Os10g41190,LOC_Os11g42430,LOC_Os12g32760	3004	88	32072	2.42646	1	0.123832	0.0171107
GOTERM_BP	GO:0030003	cellular cation homeostasis	10	0.332889	0.00177688	LOC_Os01g01340,LOC_Os01g40310,LOC_Os03g16050,LOC_Os04g33830,LOC_Os04g51792,LOC_Os05g01950,LOC_Os08g33820,LOC_Os08g39300,LOC_Os10g32700,LOC_Os12g23200	3004	25	32072	4.27057	1	0.123832	0.0171107
GOTERM_BP	GO:0000023	maltose metabolic process	18	0.599201	0.00193135	LOC_Os01g45750,LOC_Os01g48300,LOC_Os01g52170,LOC_Os01g67120,LOC_Os02g49680,LOC_Os03g16050,LOC_Os03g19760,LOC_Os03g55970,LOC_Os04g36062,LOC_Os04g51330,LOC_Os05g32710,LOC_Os06g09880,LOC_Os06g28194,LOC_Os07g46790,LOC_Os08g27010,LOC_Os08g40160,LOC_Os09g36040,LOC_Os10g28600	3004	75	32072	2.56234	1	0.131355	0.01815
GOTERM_BP	GO:0008610	lipid biosynthetic process	18	0.599201	0.00193135	LOC_Os01g50030,LOC_Os02g10120,LOC_Os02g12680,LOC_Os02g12690,LOC_Os02g49920,LOC_Os02g56860,LOC_Os03g08360,LOC_Os03g12030,LOC_Os03g14170,LOC_Os03g26530,LOC_Os03g31750,LOC_Os03g49380,LOC_Os03g52860,LOC_Os05g23880,LOC_Os06g37610,LOC_Os11g03540,LOC_Os11g36719,LOC_Os12g16650	3004	75	32072	2.56234	1	0.131355	0.01815
GOTERM_BP	GO:0006865	amino acid transport	16	0.532623	0.0020298	LOC_Os01g63770,LOC_Os01g71700,LOC_Os01g71710,LOC_Os01g71720,LOC_Os01g71760,LOC_Os02g09810,LOC_Os02g44980,LOC_Os02g49060,LOC_Os02g49510,LOC_Os02g54730,LOC_Os03g25920,LOC_Os04g38860,LOC_Os11g05690,LOC_Os11g09020,LOC_Os11g19240,LOC_Os12g14100	3004	62	32072	2.75521	1	0.136407	0.0188482
GOTERM_MF	GO:0008289	lipid binding	45	1.498	0.00213566	LOC_Os01g11940,LOC_Os01g59870,LOC_Os01g60740,LOC_Os01g64960,LOC_Os03g02050,LOC_Os03g02740,LOC_Os03g14700,LOC_Os03g57980,LOC_Os03g58940,LOC_Os04g33570,LOC_Os05g06780,LOC_Os05g07710,LOC_Os05g39250,LOC_Os06g02490,LOC_Os06g30370,LOC_Os06g35940,LOC_Os06g43600,LOC_Os06g45050,LOC_Os06g49770,LOC_Os07g07870,LOC_Os07g07930,LOC_Os07g18750,LOC_Os07g19000,LOC_Os08g01710,LOC_Os08g32970,LOC_Os08g34150,LOC_Os08g…	3004	285	32072	1.68575	1	0.141832	0.0195978
GOTERM_MF	GO:0004872	receptor activity	77	2.56325	0.00225577	LOC_Os01g02310,LOC_Os01g02370,LOC_Os01g02560,LOC_Os01g10900,LOC_Os01g12420,LOC_Os01g12430,LOC_Os01g21960,LOC_Os01g23970,LOC_Os01g41910,LOC_Os01g43440,LOC_Os01g53840,LOC_Os01g57510,LOC_Os01g59570,LOC_Os01g65650,LOC_Os02g02040,LOC_Os02g07810,LOC_Os02g32620,LOC_Os02g40190,LOC_Os02g42620,LOC_Os02g42780,LOC_Os02g49680,LOC_Os02g57560,LOC_Os03g32580,LOC_Os03g51440,LOC_Os04g30790,LOC_Os04g30800,LOC_Os04g…	3004	563	32072	1.46019	1	0.148067	0.0204593
GOTERM_MF	GO:0022891	substrate-specific transmembrane transporter activity	16	0.532623	0.00231772	LOC_Os02g13560,LOC_Os02g36414,LOC_Os02g36440,LOC_Os03g03680,LOC_Os03g10090,LOC_Os03g11900,LOC_Os03g39710,LOC_Os04g37970,LOC_Os04g38220,LOC_Os07g10590,LOC_Os07g39360,LOC_Os10g21590,LOC_Os10g40950,LOC_Os10g41190,LOC_Os11g42430,LOC_Os12g32760	3004	63	32072	2.71147	1	0.150385	0.0207795
GOTERM_CC	GO:0009522	photosystem I	9	0.299601	0.00238521	LOC_Os01g57962,LOC_Os01g58049,LOC_Os03g39610,LOC_Os03g56670,LOC_Os04g33830,LOC_Os07g25430,LOC_Os08g44680,LOC_Os12g08770,LOC_Os12g23200	3004	21	32072	4.57561	1	0.152552	0.021079
GOTERM_BP	GO:0008643	carbohydrate transport	17	0.565912	0.00240516	LOC_Os01g12130,LOC_Os01g17240,LOC_Os01g65880,LOC_Os02g13560,LOC_Os02g19820,LOC_Os02g36700,LOC_Os02g43620,LOC_Os03g03680,LOC_Os03g22200,LOC_Os03g39710,LOC_Os05g51090,LOC_Os10g21590,LOC_Os10g26470,LOC_Os10g40950,LOC_Os10g41190,LOC_Os12g29220,LOC_Os12g32760	3004	70	32072	2.59285	1	0.152552	0.021079
GOTERM_MF	GO:0004601	peroxidase activity	32	1.06525	0.0025314	LOC_Os01g15810,LOC_Os01g22249,LOC_Os01g22352,LOC_Os01g57730,LOC_Os01g61880,LOC_Os01g73200,LOC_Os02g14430,LOC_Os03g02939,LOC_Os03g13210,LOC_Os03g55420,LOC_Os04g35520,LOC_Os04g59150,LOC_Os04g59160,LOC_Os04g59200,LOC_Os05g04380,LOC_Os05g04500,LOC_Os05g06970,LOC_Os05g38980,LOC_Os05g42000,LOC_Os06g16350,LOC_Os06g27850,LOC_Os06g33100,LOC_Os06g35480,LOC_Os06g46799,LOC_Os07g01410,LOC_Os07g48010,LOC_Os07g…	3004	182	32072	1.87717	1	0.158775	0.0219388
GOTERM_BP	GO:0009611	response to wounding	26	0.865513	0.00287285	LOC_Os01g12160,LOC_Os01g12580,LOC_Os01g31980,LOC_Os01g42860,LOC_Os01g64110,LOC_Os02g12680,LOC_Os02g12690,LOC_Os03g04570,LOC_Os03g52860,LOC_Os04g02910,LOC_Os04g13210,LOC_Os04g27980,LOC_Os04g40410,LOC_Os04g56930,LOC_Os05g48040,LOC_Os06g06980,LOC_Os06g29180,LOC_Os06g47700,LOC_Os06g47750,LOC_Os07g07540,LOC_Os09g08072,LOC_Os09g32440,LOC_Os11g19340,LOC_Os12g07640,LOC_Os12g36240,LOC_Os12g40890	3004	137	32072	2.02618	1	0.176772	0.0244256
GOTERM_CC	GO:0005887	integral component of plasma membrane	11	0.366178	0.00288097	LOC_Os01g12130,LOC_Os01g56420,LOC_Os01g65880,LOC_Os02g19820,LOC_Os02g36700,LOC_Os03g22200,LOC_Os05g35050,LOC_Os05g51090,LOC_Os06g18930,LOC_Os10g26470,LOC_Os12g29220	3004	33	32072	3.55881	1	0.176772	0.0244256
GOTERM_MF	GO:0005507	copper ion binding	44	1.46471	0.00308209	LOC_Os01g03530,LOC_Os01g16030,LOC_Os01g46380,LOC_Os01g53900,LOC_Os01g57880,LOC_Os01g61160,LOC_Os01g74300,LOC_Os01g74480,LOC_Os02g06480,LOC_Os02g41590,LOC_Os02g51440,LOC_Os03g16610,LOC_Os03g44630,LOC_Os03g50140,LOC_Os03g55120,LOC_Os04g46940,LOC_Os04g53710,LOC_Os05g01970,LOC_Os05g02520,LOC_Os05g34770,LOC_Os05g45820,LOC_Os06g11490,LOC_Os06g37080,LOC_Os06g46740,LOC_Os07g02200,LOC_Os07g20340,LOC_Os07g…	3004	283	32072	1.65994	1	0.187079	0.0258498
GOTERM_BP	GO:0009834	secondary cell wall biogenesis	8	0.266312	0.0031415	LOC_Os01g54620,LOC_Os01g70200,LOC_Os02g53380,LOC_Os03g30250,LOC_Os08g02300,LOC_Os09g25490,LOC_Os10g32980,LOC_Os11g48060	3004	17	32072	5.0242	1	0.188656	0.0260678
GOTERM_BP	GO:0019684	photosynthesis, light reaction	16	0.532623	0.00339091	LOC_Os01g71700,LOC_Os02g01150,LOC_Os02g39160,LOC_Os02g49680,LOC_Os02g51080,LOC_Os03g16050,LOC_Os03g18960,LOC_Os04g16770,LOC_Os04g33830,LOC_Os04g38410,LOC_Os04g51792,LOC_Os05g22614,LOC_Os07g37030,LOC_Os08g44000,LOC_Os12g08770,LOC_Os12g23200	3004	66	32072	2.58823	1	0.201491	0.0278412
GOTERM_BP	GO:0007165	signal transduction	182	6.05859	0.00350363	LOC_Os01g02060,LOC_Os01g02310,LOC_Os01g04800,LOC_Os01g05980,LOC_Os01g06730,LOC_Os01g06870,LOC_Os01g08130,LOC_Os01g08140,LOC_Os01g10470,LOC_Os01g10900,LOC_Os01g12160,LOC_Os01g12790,LOC_Os01g12900,LOC_Os01g14110,LOC_Os01g15320,LOC_Os01g41770,LOC_Os01g41780,LOC_Os01g41910,LOC_Os01g41930,LOC_Os01g43440,LOC_Os01g43550,LOC_Os01g43950,LOC_Os01g45620,LOC_Os01g47580,LOC_Os01g47760,LOC_Os01g50100,LOC_Os01g…	3004	1560	32072	1.24558	1	0.20602	0.028467
GOTERM_BP	GO:0006098	pentose-phosphate shunt	24	0.798935	0.00377637	LOC_Os01g03040,LOC_Os01g05080,LOC_Os01g52170,LOC_Os01g67120,LOC_Os02g39160,LOC_Os02g49680,LOC_Os03g03720,LOC_Os03g16050,LOC_Os03g29950,LOC_Os04g33830,LOC_Os04g42800,LOC_Os04g54640,LOC_Os04g56400,LOC_Os05g22614,LOC_Os05g49070,LOC_Os05g49380,LOC_Os07g37030,LOC_Os08g06530,LOC_Os08g09270,LOC_Os08g40160,LOC_Os09g36040,LOC_Os10g28600,LOC_Os11g16550,LOC_Os12g08770	3004	125	32072	2.04987	1	0.219769	0.0303667
GOTERM_BP	GO:0019252	starch biosynthetic process	21	0.699068	0.00394465	LOC_Os01g45750,LOC_Os01g48300,LOC_Os01g52170,LOC_Os01g67120,LOC_Os02g39160,LOC_Os02g49680,LOC_Os03g16050,LOC_Os03g19760,LOC_Os03g31750,LOC_Os03g55970,LOC_Os04g36062,LOC_Os05g32710,LOC_Os06g09880,LOC_Os06g28194,LOC_Os07g13980,LOC_Os07g46790,LOC_Os08g25734,LOC_Os08g27010,LOC_Os08g40160,LOC_Os09g36040,LOC_Os10g28600	3004	103	32072	2.17675	1	0.226962	0.0313607
GOTERM_MF	GO:0030246	carbohydrate binding	52	1.73103	0.0039804	LOC_Os01g12070,LOC_Os01g12410,LOC_Os01g12420,LOC_Os01g12430,LOC_Os01g47810,LOC_Os01g55820,LOC_Os01g65010,LOC_Os01g65030,LOC_Os02g04330,LOC_Os02g32620,LOC_Os02g42780,LOC_Os02g48200,LOC_Os02g56810,LOC_Os03g30250,LOC_Os03g61310,LOC_Os04g03579,LOC_Os04g12080,LOC_Os04g34250,LOC_Os04g34270,LOC_Os04g34290,LOC_Os04g34320,LOC_Os04g34390,LOC_Os04g38540,LOC_Os04g41640,LOC_Os04g42740,LOC_Os04g54002,LOC_Os04g…	3004	356	32072	1.55948	1	0.226962	0.0313607
GOTERM_BP	GO:0006032	chitin catabolic process	11	0.366178	0.00409757	LOC_Os01g64110,LOC_Os04g41620,LOC_Os04g41680,LOC_Os06g51050,LOC_Os06g51060,LOC_Os09g32080,LOC_Os10g28080,LOC_Os10g39680,LOC_Os10g39700,LOC_Os11g37940,LOC_Os11g37970	3004	35	32072	3.35545	1	0.231307	0.0319611
GOTERM_BP	GO:0019344	cysteine biosynthetic process	17	0.565912	0.00432077	LOC_Os02g01150,LOC_Os02g10390,LOC_Os02g49680,LOC_Os02g51080,LOC_Os03g03720,LOC_Os03g56670,LOC_Os04g33830,LOC_Os04g38410,LOC_Os04g51792,LOC_Os04g53230,LOC_Os04g56400,LOC_Os06g06980,LOC_Os08g33820,LOC_Os08g34210,LOC_Os11g13890,LOC_Os11g16550,LOC_Os12g08770	3004	75	32072	2.41999	1	0.241492	0.0333683
GOTERM_BP	GO:0048443	stamen development	9	0.299601	0.0046414	LOC_Os01g10504,LOC_Os01g43440,LOC_Os01g66290,LOC_Os05g11414,LOC_Os06g44970,LOC_Os06g49840,LOC_Os08g45030,LOC_Os09g32948,LOC_Os12g10540	3004	24	32072	4.00366	1	0.256868	0.035493
GOTERM_MF	GO:0009899	ent-kaurene synthase activity	6	0.199734	0.00475072	LOC_Os02g36140,LOC_Os02g36220,LOC_Os02g36264,LOC_Os04g10060,LOC_Os11g28530,LOC_Os12g30824	3004	9	32072	7.11762	1	0.260366	0.0359763
GOTERM_MF	GO:0051119	sugar transmembrane transporter activity	8	0.266312	0.00513184	LOC_Os01g12130,LOC_Os01g56420,LOC_Os01g65880,LOC_Os02g19820,LOC_Os03g22200,LOC_Os05g35050,LOC_Os05g51090,LOC_Os12g29220	3004	19	32072	4.49534	1	0.278549	0.0384888
GOTERM_MF	GO:0015171	amino acid transmembrane transporter activity	10	0.332889	0.0058103	LOC_Os01g71700,LOC_Os01g71710,LOC_Os01g71720,LOC_Os01g71760,LOC_Os02g49060,LOC_Os02g54730,LOC_Os03g25920,LOC_Os04g38860,LOC_Os11g05690,LOC_Os11g19240	3004	31	32072	3.44401	1	0.309425	0.042755
GOTERM_BP	GO:0015706	nitrate transport	10	0.332889	0.0058103	LOC_Os01g17240,LOC_Os01g45900,LOC_Os01g53040,LOC_Os02g43620,LOC_Os02g53100,LOC_Os04g40410,LOC_Os08g02110,LOC_Os10g32700,LOC_Os10g36924,LOC_Os12g25200	3004	31	32072	3.44401	1	0.309425	0.042755
GOTERM_BP	GO:0030154	cell differentiation	78	2.59654	0.00588474	LOC_Os01g02110,LOC_Os01g09670,LOC_Os01g10504,LOC_Os01g10830,LOC_Os01g10900,LOC_Os01g47190,LOC_Os01g48900,LOC_Os01g50030,LOC_Os01g50032,LOC_Os01g50100,LOC_Os01g56420,LOC_Os01g62570,LOC_Os01g63770,LOC_Os01g66030,LOC_Os02g01355,LOC_Os02g02210,LOC_Os02g02840,LOC_Os02g13150,LOC_Os02g35090,LOC_Os02g37580,LOC_Os02g38340,LOC_Os02g48450,LOC_Os02g55250,LOC_Os03g06760,LOC_Os03g08360,LOC_Os03g18370,LOC_Os03g…	3004	597	32072	1.39491	1	0.309595	0.0427786
GOTERM_BP	GO:0006979	response to oxidative stress	40	1.33156	0.0059232	LOC_Os01g01660,LOC_Os01g09620,LOC_Os01g15810,LOC_Os01g22249,LOC_Os01g22352,LOC_Os01g57730,LOC_Os01g73200,LOC_Os02g14430,LOC_Os03g02939,LOC_Os03g13210,LOC_Os03g52390,LOC_Os03g55420,LOC_Os04g35520,LOC_Os04g59150,LOC_Os04g59160,LOC_Os04g59200,LOC_Os05g04380,LOC_Os05g04500,LOC_Os05g06970,LOC_Os05g42000,LOC_Os06g16350,LOC_Os06g27760,LOC_Os06g27850,LOC_Os06g33100,LOC_Os06g35480,LOC_Os06g46799,LOC_Os07g…	3004	261	32072	1.63623	1	0.309595	0.0427786
GOTERM_BP	GO:0055085	transmembrane transport	68	2.26365	0.00603738	LOC_Os01g11250,LOC_Os01g12680,LOC_Os01g17214,LOC_Os01g17240,LOC_Os01g31980,LOC_Os01g50100,LOC_Os01g55200,LOC_Os02g07830,LOC_Os02g13560,LOC_Os02g21009,LOC_Os02g36414,LOC_Os02g36440,LOC_Os02g41710,LOC_Os02g43620,LOC_Os03g03680,LOC_Os03g04360,LOC_Os03g05620,LOC_Os03g06090,LOC_Os03g06520,LOC_Os03g10090,LOC_Os03g11900,LOC_Os03g39710,LOC_Os03g46454,LOC_Os03g46470,LOC_Os03g61290,LOC_Os03g64150,LOC_Os04g…	3004	507	32072	1.43195	1	0.312668	0.0432032
GOTERM_BP	GO:0030001	metal ion transport	22	0.732357	0.00642117	LOC_Os01g09660,LOC_Os01g20830,LOC_Os01g64890,LOC_Os01g70240,LOC_Os01g74490,LOC_Os03g06090,LOC_Os03g22490,LOC_Os03g26650,LOC_Os03g46454,LOC_Os03g46470,LOC_Os03g60480,LOC_Os04g32800,LOC_Os04g35160,LOC_Os04g46940,LOC_Os04g56570,LOC_Os05g45820,LOC_Os06g35060,LOC_Os07g12900,LOC_Os07g20340,LOC_Os07g26110,LOC_Os07g48390,LOC_Os08g31140	3004	116	32072	2.02484	1	0.329521	0.0455319
GOTERM_CC	GO:0005575	cellular_component	553	18.4088	0.0066906	LOC_Os01g01890,LOC_Os01g02020,LOC_Os01g02310,LOC_Os01g02860,LOC_Os01g06220,LOC_Os01g07780,LOC_Os01g08110,LOC_Os01g08130,LOC_Os01g08140,LOC_Os01g08380,LOC_Os01g09620,LOC_Os01g09700,LOC_Os01g09880,LOC_Os01g10210,LOC_Os01g10400,LOC_Os01g13300,LOC_Os01g15320,LOC_Os01g15448,LOC_Os01g19480,LOC_Os01g19880,LOC_Os01g20830,LOC_Os01g21960,LOC_Os01g24710,LOC_Os01g24790,LOC_Os01g25010,LOC_Os01g25360,LOC_Os01g…	3004	5319	32072	1.11	1	0.340255	0.047015
Region7
Type	Term	Description	Count	%	PValue	Genes	ListTotal	PopHits	PopTotal	FoldChange	Bonferroni	Benjamini	FDR
GOTERM_CC	GO:0016023	cytoplasmic membrane-bounded vesicle	439	24.0153	6.61e-28	LOC_Os01g02130,LOC_Os01g03549,LOC_Os01g03640,LOC_Os01g04230,LOC_Os01g04570,LOC_Os01g06280,LOC_Os01g06620,LOC_Os01g06790,LOC_Os01g09540,LOC_Os01g11670,LOC_Os01g12740,LOC_Os01g12770,LOC_Os01g13440,LOC_Os01g14850,LOC_Os01g14940,LOC_Os01g18170,LOC_Os01g21630,LOC_Os01g22670,LOC_Os01g22680,LOC_Os01g25460,LOC_Os01g25560,LOC_Os01g27140,LOC_Os01g33300,LOC_Os01g36350,LOC_Os01g39600,LOC_Os01g39830,LOC_Os01g…	1828	4509	32072	1.70818	3.61e-25	2.48e-24	3.61e-25
GOTERM_BP	GO:0008152	metabolic process	647	35.3939	4.42e-24	LOC_Os01g01710,LOC_Os01g03549,LOC_Os01g03640,LOC_Os01g04330,LOC_Os01g04570,LOC_Os01g04920,LOC_Os01g05840,LOC_Os01g06280,LOC_Os01g06790,LOC_Os01g06876,LOC_Os01g06890,LOC_Os01g06900,LOC_Os01g08090,LOC_Os01g08220,LOC_Os01g08780,LOC_Os01g09030,LOC_Os01g09540,LOC_Os01g09830,LOC_Os01g10890,LOC_Os01g11660,LOC_Os01g12304,LOC_Os01g12490,LOC_Os01g12740,LOC_Os01g12770,LOC_Os01g13270,LOC_Os01g14940,LOC_Os01g…	1828	7849	32072	1.44624	2.42e-21	8.31e-21	1.21e-21
GOTERM_CC	GO:0005623	cell	289	15.8096	4.57e-23	LOC_Os01g04230,LOC_Os01g04570,LOC_Os01g04710,LOC_Os01g06790,LOC_Os01g06890,LOC_Os01g06900,LOC_Os01g11460,LOC_Os01g11660,LOC_Os01g12304,LOC_Os01g14940,LOC_Os01g18400,LOC_Os01g21070,LOC_Os01g21630,LOC_Os01g22670,LOC_Os01g26340,LOC_Os01g33300,LOC_Os01g39600,LOC_Os01g41200,LOC_Os01g41240,LOC_Os01g43740,LOC_Os01g46350,LOC_Os01g49320,LOC_Os01g56320,LOC_Os01g59050,LOC_Os01g60060,LOC_Os01g60670,LOC_Os01g…	1828	2702	32072	1.87656	2.5e-20	5.73e-20	8.32e-21
GOTERM_CC	GO:0005576	extracellular region	119	6.50985	1.1e-15	LOC_Os01g18170,LOC_Os01g21034,LOC_Os01g21070,LOC_Os01g25484,LOC_Os01g25560,LOC_Os01g33300,LOC_Os01g39600,LOC_Os01g39830,LOC_Os01g51570,LOC_Os01g58240,LOC_Os01g60770,LOC_Os01g63190,LOC_Os01g71310,LOC_Os01g71474,LOC_Os02g10300,LOC_Os02g12730,LOC_Os02g13660,LOC_Os02g15690,LOC_Os02g38920,LOC_Os02g49850,LOC_Os02g50040,LOC_Os02g53820,LOC_Os02g54060,LOC_Os03g01610,LOC_Os03g01640,LOC_Os03g01800,LOC_Os03g…	1828	883	32072	2.36448	5.99e-13	1.03e-12	1.5e-13
GOTERM_CC	GO:0005886	plasma membrane	327	17.8884	4.34e-13	LOC_Os01g04330,LOC_Os01g06280,LOC_Os01g08020,LOC_Os01g13270,LOC_Os01g14520,LOC_Os01g16400,LOC_Os01g21034,LOC_Os01g21300,LOC_Os01g21310,LOC_Os01g21970,LOC_Os01g26300,LOC_Os01g27880,LOC_Os01g28840,LOC_Os01g33160,LOC_Os01g36720,LOC_Os01g43460,LOC_Os01g43580,LOC_Os01g48000,LOC_Os01g48410,LOC_Os01g50080,LOC_Os01g50820,LOC_Os01g51570,LOC_Os01g51840,LOC_Os01g52470,LOC_Os01g52660,LOC_Os01g54080,LOC_Os01g…	1828	3811	32072	1.50542	2.37e-10	3.26e-10	4.74e-11
GOTERM_BP	GO:0009987	cellular process	550	30.0875	2.61e-12	LOC_Os01g01160,LOC_Os01g01302,LOC_Os01g01710,LOC_Os01g04570,LOC_Os01g04920,LOC_Os01g06280,LOC_Os01g06790,LOC_Os01g06876,LOC_Os01g06890,LOC_Os01g06900,LOC_Os01g08020,LOC_Os01g08090,LOC_Os01g08780,LOC_Os01g09540,LOC_Os01g10890,LOC_Os01g12210,LOC_Os01g12490,LOC_Os01g13270,LOC_Os01g18110,LOC_Os01g21970,LOC_Os01g27170,LOC_Os01g27260,LOC_Os01g27880,LOC_Os01g36720,LOC_Os01g39860,LOC_Os01g39970,LOC_Os01g…	1828	7318	32072	1.31862	1.43e-09	1.64e-09	2.38e-10
GOTERM_MF	GO:0004713	protein tyrosine kinase activity	139	7.60394	6.1e-11	LOC_Os01g04570,LOC_Os01g06280,LOC_Os01g10890,LOC_Os01g13270,LOC_Os01g21970,LOC_Os01g26300,LOC_Os01g39600,LOC_Os01g39970,LOC_Os01g41730,LOC_Os01g44110,LOC_Os01g47470,LOC_Os01g48000,LOC_Os01g50420,LOC_Os01g55440,LOC_Os01g57560,LOC_Os01g57940,LOC_Os01g59360,LOC_Os01g60060,LOC_Os01g60670,LOC_Os01g70410,LOC_Os01g72700,LOC_Os02g02490,LOC_Os02g12660,LOC_Os02g13780,LOC_Os02g26160,LOC_Os02g40200,LOC_Os02g…	1828	1314	32072	1.85596	3.33e-08	3.27e-08	4.76e-09
GOTERM_BP	GO:0005975	carbohydrate metabolic process	127	6.94748	7.24e-11	LOC_Os01g01710,LOC_Os01g18400,LOC_Os01g21070,LOC_Os01g27880,LOC_Os01g33300,LOC_Os01g39830,LOC_Os01g46950,LOC_Os01g49320,LOC_Os01g51570,LOC_Os01g52710,LOC_Os01g63270,LOC_Os01g63810,LOC_Os01g64660,LOC_Os01g69030,LOC_Os01g71280,LOC_Os01g71474,LOC_Os02g03550,LOC_Os02g09450,LOC_Os02g10300,LOC_Os02g12730,LOC_Os02g15690,LOC_Os02g31030,LOC_Os02g32660,LOC_Os02g36770,LOC_Os02g38920,LOC_Os02g50040,LOC_Os02g…	1828	1163	32072	1.9159	3.95e-08	3.4e-08	4.94e-09
GOTERM_BP	GO:0055085	transmembrane transport	72	3.93873	9.5e-11	LOC_Os01g14520,LOC_Os01g28840,LOC_Os01g36720,LOC_Os01g43460,LOC_Os01g50080,LOC_Os01g50820,LOC_Os01g52130,LOC_Os01g60140,LOC_Os01g69070,LOC_Os01g74110,LOC_Os02g06540,LOC_Os02g14980,LOC_Os02g17500,LOC_Os02g21750,LOC_Os02g44730,LOC_Os02g45520,LOC_Os02g46680,LOC_Os02g46850,LOC_Os02g50820,LOC_Os03g01700,LOC_Os03g05640,LOC_Os03g09930,LOC_Os03g12530,LOC_Os03g12790,LOC_Os03g29850,LOC_Os03g37411,LOC_Os03g…	1828	507	32072	2.49158	5.18e-08	3.96e-08	5.76e-09
GOTERM_MF	GO:0004672	protein kinase activity	146	7.98687	1.13e-10	LOC_Os01g04570,LOC_Os01g06280,LOC_Os01g10890,LOC_Os01g13270,LOC_Os01g21970,LOC_Os01g26300,LOC_Os01g39600,LOC_Os01g39970,LOC_Os01g41730,LOC_Os01g44110,LOC_Os01g47470,LOC_Os01g48000,LOC_Os01g50420,LOC_Os01g55440,LOC_Os01g57560,LOC_Os01g57940,LOC_Os01g59360,LOC_Os01g60060,LOC_Os01g60670,LOC_Os01g70410,LOC_Os01g72700,LOC_Os02g02490,LOC_Os02g12660,LOC_Os02g13780,LOC_Os02g26160,LOC_Os02g40200,LOC_Os02g…	1828	1419	32072	1.80518	6.15e-08	4.23e-08	6.15e-09
GOTERM_MF	GO:0004674	protein serine/threonine kinase activity	143	7.82276	1.73e-10	LOC_Os01g04570,LOC_Os01g06280,LOC_Os01g10890,LOC_Os01g13270,LOC_Os01g21970,LOC_Os01g26300,LOC_Os01g39600,LOC_Os01g39970,LOC_Os01g41730,LOC_Os01g44110,LOC_Os01g47470,LOC_Os01g48000,LOC_Os01g50420,LOC_Os01g55440,LOC_Os01g57560,LOC_Os01g57940,LOC_Os01g59360,LOC_Os01g60060,LOC_Os01g60670,LOC_Os01g70410,LOC_Os01g72700,LOC_Os02g02490,LOC_Os02g12660,LOC_Os02g13780,LOC_Os02g26160,LOC_Os02g40200,LOC_Os02g…	1828	1389	32072	1.80627	9.43e-08	5.9e-08	8.57e-09
GOTERM_BP	GO:0006468	protein phosphorylation	147	8.04158	2.57e-10	LOC_Os01g04570,LOC_Os01g06280,LOC_Os01g10890,LOC_Os01g13270,LOC_Os01g21970,LOC_Os01g26300,LOC_Os01g39600,LOC_Os01g39970,LOC_Os01g41730,LOC_Os01g44110,LOC_Os01g47470,LOC_Os01g48000,LOC_Os01g50420,LOC_Os01g55440,LOC_Os01g57560,LOC_Os01g57940,LOC_Os01g59360,LOC_Os01g60060,LOC_Os01g60670,LOC_Os01g70410,LOC_Os01g72700,LOC_Os02g02490,LOC_Os02g12660,LOC_Os02g13780,LOC_Os02g26160,LOC_Os02g40200,LOC_Os02g…	1828	1451	32072	1.77746	1.4e-07	8.05e-08	1.17e-08
GOTERM_BP	GO:0016036	cellular response to phosphate starvation	24	1.31291	2.79e-10	LOC_Os01g03549,LOC_Os01g03640,LOC_Os01g04920,LOC_Os01g56880,LOC_Os02g10780,LOC_Os02g55910,LOC_Os02g56510,LOC_Os03g05640,LOC_Os03g29250,LOC_Os03g44810,LOC_Os03g58570,LOC_Os04g10750,LOC_Os06g29790,LOC_Os06g40120,LOC_Os07g43670,LOC_Os08g15030,LOC_Os08g20420,LOC_Os09g25390,LOC_Os10g13700,LOC_Os10g25310,LOC_Os10g30770,LOC_Os10g30790,LOC_Os11g38050,LOC_Os12g44020	1828	67	32072	6.28473	1.52e-07	8.06e-08	1.17e-08
GOTERM_MF	GO:0016787	hydrolase activity	265	14.4967	4.51e-10	LOC_Os01g04710,LOC_Os01g08780,LOC_Os01g09540,LOC_Os01g11660,LOC_Os01g11670,LOC_Os01g12304,LOC_Os01g14940,LOC_Os01g15130,LOC_Os01g18400,LOC_Os01g21034,LOC_Os01g21070,LOC_Os01g21630,LOC_Os01g22670,LOC_Os01g22680,LOC_Os01g27880,LOC_Os01g33300,LOC_Os01g39830,LOC_Os01g41240,LOC_Os01g42690,LOC_Os01g43140,LOC_Os01g49320,LOC_Os01g50080,LOC_Os01g50810,LOC_Os01g51570,LOC_Os01g52230,LOC_Os01g53630,LOC_Os01g…	1828	3131	32072	1.48495	2.46e-07	1.21e-07	1.76e-08
GOTERM_MF	GO:0016491	oxidoreductase activity	142	7.76805	2.47e-09	LOC_Os01g01710,LOC_Os01g03549,LOC_Os01g03640,LOC_Os01g05840,LOC_Os01g06900,LOC_Os01g12740,LOC_Os01g12770,LOC_Os01g25484,LOC_Os01g35230,LOC_Os01g39860,LOC_Os01g43740,LOC_Os01g55240,LOC_Os01g57940,LOC_Os01g58194,LOC_Os01g60080,LOC_Os01g62870,LOC_Os01g63190,LOC_Os01g69080,LOC_Os01g70525,LOC_Os01g70870,LOC_Os01g70930,LOC_Os01g71280,LOC_Os01g71310,LOC_Os02g02400,LOC_Os02g04510,LOC_Os02g09200,LOC_Os02g…	1828	1438	32072	1.73252	1.35e-06	6.2e-07	9.01e-08
GOTERM_CC	GO:0005618	cell wall	119	6.50985	2.95e-09	LOC_Os01g03549,LOC_Os01g03640,LOC_Os01g10930,LOC_Os01g18170,LOC_Os01g18400,LOC_Os01g21034,LOC_Os01g39830,LOC_Os01g50810,LOC_Os01g51570,LOC_Os01g53990,LOC_Os01g56320,LOC_Os01g56880,LOC_Os01g58240,LOC_Os01g60770,LOC_Os01g62260,LOC_Os01g64860,LOC_Os01g65790,LOC_Os01g69240,LOC_Os01g71474,LOC_Os02g02400,LOC_Os02g03550,LOC_Os02g07060,LOC_Os02g12730,LOC_Os02g20540,LOC_Os02g42810,LOC_Os02g50820,LOC_Os02g…	1828	1137	32072	1.83627	1.61e-06	6.92e-07	1.01e-07
GOTERM_BP	GO:0055114	oxidation-reduction process	148	8.09628	4.11e-09	LOC_Os01g01710,LOC_Os01g03549,LOC_Os01g03640,LOC_Os01g05840,LOC_Os01g09030,LOC_Os01g12490,LOC_Os01g12740,LOC_Os01g12770,LOC_Os01g25484,LOC_Os01g27140,LOC_Os01g35230,LOC_Os01g39860,LOC_Os01g43740,LOC_Os01g55240,LOC_Os01g55795,LOC_Os01g57940,LOC_Os01g58194,LOC_Os01g60080,LOC_Os01g62870,LOC_Os01g63190,LOC_Os01g68480,LOC_Os01g69030,LOC_Os01g69080,LOC_Os01g70525,LOC_Os01g70870,LOC_Os01g70930,LOC_Os01g…	1828	1532	32072	1.69493	2.24e-06	9.07e-07	1.32e-07
GOTERM_MF	GO:0016772	transferase activity, transferring phosphorus-containing groups	141	7.71335	7.45e-09	LOC_Os01g04570,LOC_Os01g06280,LOC_Os01g10890,LOC_Os01g13270,LOC_Os01g21970,LOC_Os01g39600,LOC_Os01g39970,LOC_Os01g41730,LOC_Os01g44110,LOC_Os01g47470,LOC_Os01g48000,LOC_Os01g50420,LOC_Os01g55440,LOC_Os01g57560,LOC_Os01g57940,LOC_Os01g59360,LOC_Os01g60060,LOC_Os01g60670,LOC_Os01g70410,LOC_Os01g72700,LOC_Os02g02490,LOC_Os02g12660,LOC_Os02g13780,LOC_Os02g26160,LOC_Os02g40200,LOC_Os02g56370,LOC_Os02g…	1828	1452	32072	1.70374	4.07e-06	1.56e-06	2.26e-07
GOTERM_MF	GO:0004553	hydrolase activity, hydrolyzing O-glycosyl compounds	48	2.62582	1.24e-08	LOC_Os01g21070,LOC_Os01g39830,LOC_Os01g49320,LOC_Os01g51570,LOC_Os01g71474,LOC_Os02g03550,LOC_Os02g12730,LOC_Os02g32660,LOC_Os02g50040,LOC_Os02g53820,LOC_Os03g01800,LOC_Os03g10469,LOC_Os03g12620,LOC_Os03g13570,LOC_Os03g44810,LOC_Os03g46660,LOC_Os03g53800,LOC_Os04g40490,LOC_Os04g41970,LOC_Os04g51450,LOC_Os04g53950,LOC_Os05g12150,LOC_Os05g15850,LOC_Os05g23924,LOC_Os05g51750,LOC_Os06g07600,LOC_Os06g…	1828	307	32072	2.74317	6.78e-06	2.46e-06	3.57e-07
GOTERM_CC	GO:0048046	apoplast	51	2.78993	1.38e-08	LOC_Os01g18170,LOC_Os01g21034,LOC_Os01g25484,LOC_Os01g39830,LOC_Os01g41710,LOC_Os01g51570,LOC_Os01g52240,LOC_Os01g63190,LOC_Os01g71474,LOC_Os02g02400,LOC_Os02g03550,LOC_Os02g12730,LOC_Os02g54060,LOC_Os03g01800,LOC_Os03g08790,LOC_Os03g13570,LOC_Os03g16900,LOC_Os03g44170,LOC_Os03g58980,LOC_Os04g51450,LOC_Os04g52280,LOC_Os04g53950,LOC_Os04g58710,LOC_Os05g02530,LOC_Os05g38420,LOC_Os06g05550,LOC_Os06g…	1828	340	32072	2.63173	7.53e-06	2.59e-06	3.76e-07
GOTERM_MF	GO:0003824	catalytic activity	337	18.4354	2.68e-08	LOC_Os01g01710,LOC_Os01g03549,LOC_Os01g03640,LOC_Os01g05840,LOC_Os01g08220,LOC_Os01g09030,LOC_Os01g09830,LOC_Os01g11660,LOC_Os01g12490,LOC_Os01g12740,LOC_Os01g12770,LOC_Os01g15130,LOC_Os01g18110,LOC_Os01g20910,LOC_Os01g21070,LOC_Os01g21300,LOC_Os01g21310,LOC_Os01g25484,LOC_Os01g26039,LOC_Os01g27140,LOC_Os01g27880,LOC_Os01g36350,LOC_Os01g39830,LOC_Os01g39860,LOC_Os01g41240,LOC_Os01g43140,LOC_Os01g…	1828	4383	32072	1.34899	1.46e-05	4.8e-06	6.98e-07
GOTERM_MF	GO:0016301	kinase activity	188	10.2845	3.11e-08	LOC_Os01g04230,LOC_Os01g04570,LOC_Os01g06280,LOC_Os01g06790,LOC_Os01g06876,LOC_Os01g06890,LOC_Os01g06900,LOC_Os01g10890,LOC_Os01g13270,LOC_Os01g21970,LOC_Os01g26300,LOC_Os01g39600,LOC_Os01g39970,LOC_Os01g41730,LOC_Os01g44110,LOC_Os01g47470,LOC_Os01g48000,LOC_Os01g50420,LOC_Os01g55440,LOC_Os01g56764,LOC_Os01g57560,LOC_Os01g57940,LOC_Os01g59360,LOC_Os01g60060,LOC_Os01g60670,LOC_Os01g70410,LOC_Os01g…	1828	2152	32072	1.53273	1.7e-05	5.31e-06	7.71e-07
GOTERM_CC	GO:0016021	integral component of membrane	199	10.8862	3.3e-08	LOC_Os01g04640,LOC_Os01g06310,LOC_Os01g08020,LOC_Os01g14520,LOC_Os01g25460,LOC_Os01g27170,LOC_Os01g28840,LOC_Os01g36720,LOC_Os01g41710,LOC_Os01g43460,LOC_Os01g50080,LOC_Os01g50820,LOC_Os01g52130,LOC_Os01g54515,LOC_Os01g57940,LOC_Os01g60060,LOC_Os01g60140,LOC_Os01g60670,LOC_Os01g60770,LOC_Os01g60810,LOC_Os01g61510,LOC_Os01g63240,LOC_Os01g64660,LOC_Os01g65590,LOC_Os01g66010,LOC_Os01g67360,LOC_Os01g…	1828	2313	32072	1.50948	1.8e-05	5.39e-06	7.84e-07
GOTERM_MF	GO:0009055	electron carrier activity	93	5.08753	4.78e-08	LOC_Os01g09830,LOC_Os01g12740,LOC_Os01g12770,LOC_Os01g25484,LOC_Os01g27140,LOC_Os01g43740,LOC_Os01g57940,LOC_Os01g68480,LOC_Os01g71310,LOC_Os02g09200,LOC_Os02g09220,LOC_Os02g09240,LOC_Os02g12890,LOC_Os02g13780,LOC_Os02g21810,LOC_Os02g30100,LOC_Os02g30110,LOC_Os02g44654,LOC_Os02g45710,LOC_Os02g49850,LOC_Os02g50770,LOC_Os02g51370,LOC_Os02g52180,LOC_Os02g53130,LOC_Os02g58720,LOC_Os03g02920,LOC_Os03g…	1828	860	32072	1.89729	2.61e-05	7.31e-06	1.06e-06
GOTERM_BP	GO:0009653	anatomical structure morphogenesis	95	5.19694	4.86e-08	LOC_Os01g03840,LOC_Os01g06280,LOC_Os01g11550,LOC_Os01g13270,LOC_Os01g50080,LOC_Os01g55100,LOC_Os01g55520,LOC_Os01g58194,LOC_Os01g59360,LOC_Os01g60770,LOC_Os01g60810,LOC_Os01g65590,LOC_Os01g68540,LOC_Os01g68890,LOC_Os02g03400,LOC_Os02g12890,LOC_Os02g16909,LOC_Os02g17240,LOC_Os02g35660,LOC_Os02g36890,LOC_Os02g40710,LOC_Os02g42160,LOC_Os02g42950,LOC_Os02g48730,LOC_Os03g01610,LOC_Os03g01640,LOC_Os03g…	1828	886	32072	1.88122	2.65e-05	7.31e-06	1.06e-06
GOTERM_BP	GO:0016049	cell growth	62	3.39168	1.21e-07	LOC_Os01g06280,LOC_Os01g13270,LOC_Os01g50080,LOC_Os01g58194,LOC_Os01g59360,LOC_Os01g60770,LOC_Os01g60810,LOC_Os01g68540,LOC_Os01g68890,LOC_Os02g17240,LOC_Os02g42160,LOC_Os02g48730,LOC_Os02g50040,LOC_Os02g57120,LOC_Os03g01610,LOC_Os03g01640,LOC_Os03g14090,LOC_Os03g24170,LOC_Os03g60720,LOC_Os03g62090,LOC_Os04g25150,LOC_Os04g25190,LOC_Os04g26190,LOC_Os04g26220,LOC_Os04g26230,LOC_Os04g37920,LOC_Os04g…	1828	494	32072	2.20199	6.6e-05	1.75e-05	2.54e-06
GOTERM_CC	GO:0016020	membrane	436	23.8512	2.34e-07	LOC_Os01g03549,LOC_Os01g03640,LOC_Os01g04640,LOC_Os01g06280,LOC_Os01g06310,LOC_Os01g08020,LOC_Os01g08460,LOC_Os01g09190,LOC_Os01g09540,LOC_Os01g10930,LOC_Os01g12210,LOC_Os01g13390,LOC_Os01g14520,LOC_Os01g24500,LOC_Os01g25484,LOC_Os01g27170,LOC_Os01g27190,LOC_Os01g28840,LOC_Os01g36580,LOC_Os01g36720,LOC_Os01g37590,LOC_Os01g39600,LOC_Os01g41200,LOC_Os01g41710,LOC_Os01g43460,LOC_Os01g46850,LOC_Os01g…	1828	6058	32072	1.26272	0.000127642	3.25e-05	4.73e-06
GOTERM_MF	GO:0005506	iron ion binding	79	4.32166	2.74e-07	LOC_Os01g12740,LOC_Os01g12770,LOC_Os01g25484,LOC_Os01g35230,LOC_Os01g39860,LOC_Os01g43740,LOC_Os01g55240,LOC_Os01g57940,LOC_Os02g02400,LOC_Os02g09200,LOC_Os02g09220,LOC_Os02g09240,LOC_Os02g12890,LOC_Os02g21810,LOC_Os02g30100,LOC_Os02g30110,LOC_Os02g40784,LOC_Os02g44654,LOC_Os02g50770,LOC_Os02g53130,LOC_Os02g58720,LOC_Os03g02920,LOC_Os03g03910,LOC_Os03g05770,LOC_Os03g13140,LOC_Os03g30420,LOC_Os03g…	1828	717	32072	1.93312	0.000149398	3.67e-05	5.34e-06
GOTERM_MF	GO:0005215	transporter activity	141	7.71335	5.83e-07	LOC_Os01g08020,LOC_Os01g12210,LOC_Os01g14520,LOC_Os01g27170,LOC_Os01g28840,LOC_Os01g36720,LOC_Os01g37590,LOC_Os01g43460,LOC_Os01g46860,LOC_Os01g50080,LOC_Os01g50820,LOC_Os01g52130,LOC_Os01g54515,LOC_Os01g60140,LOC_Os01g61510,LOC_Os01g65140,LOC_Os01g65500,LOC_Os01g66010,LOC_Os01g68050,LOC_Os01g69070,LOC_Os01g71240,LOC_Os01g74110,LOC_Os01g74450,LOC_Os02g04030,LOC_Os02g06540,LOC_Os02g09150,LOC_Os02g…	1828	1574	32072	1.57168	0.000318381	7.55e-05	1.1e-05
GOTERM_MF	GO:0030599	pectinesterase activity	22	1.2035	6.08e-07	LOC_Os01g14940,LOC_Os01g21034,LOC_Os01g50810,LOC_Os01g53990,LOC_Os01g65790,LOC_Os02g01310,LOC_Os03g01020,LOC_Os03g18860,LOC_Os03g19610,LOC_Os04g38560,LOC_Os04g46740,LOC_Os05g20570,LOC_Os05g46530,LOC_Os06g09340,LOC_Os07g47830,LOC_Os08g04650,LOC_Os08g34910,LOC_Os09g26360,LOC_Os11g11710,LOC_Os11g45220,LOC_Os11g45720,LOC_Os11g45730	1828	92	32072	4.19551	0.000331742	7.61e-05	1.11e-05
GOTERM_BP	GO:0009856	pollination	31	1.69584	7.28e-07	LOC_Os01g13270,LOC_Os01g58194,LOC_Os01g59360,LOC_Os01g68890,LOC_Os02g17240,LOC_Os02g49850,LOC_Os03g14090,LOC_Os03g24170,LOC_Os03g50160,LOC_Os03g63390,LOC_Os04g02690,LOC_Os04g49690,LOC_Os05g14750,LOC_Os05g20150,LOC_Os05g25370,LOC_Os05g25430,LOC_Os06g36880,LOC_Os07g41590,LOC_Os08g10510,LOC_Os08g25710,LOC_Os08g43500,LOC_Os10g34680,LOC_Os11g03230,LOC_Os11g03270,LOC_Os11g04170,LOC_Os11g04840,LOC_Os11g…	1828	176	32072	3.09029	0.000397519	8.82e-05	1.28e-05
GOTERM_BP	GO:0006810	transport	209	11.4333	1.26e-06	LOC_Os01g03490,LOC_Os01g08020,LOC_Os01g09830,LOC_Os01g12210,LOC_Os01g14520,LOC_Os01g25484,LOC_Os01g27170,LOC_Os01g28840,LOC_Os01g36720,LOC_Os01g37590,LOC_Os01g41200,LOC_Os01g43460,LOC_Os01g46860,LOC_Os01g48710,LOC_Os01g50080,LOC_Os01g50820,LOC_Os01g52130,LOC_Os01g54515,LOC_Os01g57940,LOC_Os01g60140,LOC_Os01g61070,LOC_Os01g61510,LOC_Os01g64660,LOC_Os01g65140,LOC_Os01g65500,LOC_Os01g66010,LOC_Os01g…	1828	2596	32072	1.41251	0.000690475	0.000148468	2.16e-05
GOTERM_BP	GO:0006950	response to stress	282	15.4267	1.61e-06	LOC_Os01g01160,LOC_Os01g03549,LOC_Os01g03640,LOC_Os01g04330,LOC_Os01g04370,LOC_Os01g04920,LOC_Os01g05650,LOC_Os01g06790,LOC_Os01g06876,LOC_Os01g06890,LOC_Os01g06900,LOC_Os01g09100,LOC_Os01g16400,LOC_Os01g18110,LOC_Os01g18170,LOC_Os01g18400,LOC_Os01g19330,LOC_Os01g21250,LOC_Os01g22680,LOC_Os01g26340,LOC_Os01g33160,LOC_Os01g37590,LOC_Os01g39970,LOC_Os01g42190,LOC_Os01g43590,LOC_Os01g49320,LOC_Os01g…	1828	3723	32072	1.32894	0.000881721	0.000183845	2.67e-05
GOTERM_MF	GO:0020037	heme binding	61	3.33698	2.04e-06	LOC_Os01g12740,LOC_Os01g12770,LOC_Os01g25484,LOC_Os01g43740,LOC_Os02g02400,LOC_Os02g09200,LOC_Os02g09220,LOC_Os02g09240,LOC_Os02g12890,LOC_Os02g21810,LOC_Os02g30100,LOC_Os02g30110,LOC_Os02g44654,LOC_Os02g50770,LOC_Os02g53130,LOC_Os02g58720,LOC_Os03g02920,LOC_Os03g03910,LOC_Os03g05770,LOC_Os03g13140,LOC_Os03g30420,LOC_Os03g39650,LOC_Os03g55230,LOC_Os04g01140,LOC_Os04g39430,LOC_Os04g39780,LOC_Os04g…	1828	530	32072	2.01931	0.00111653	0.000225958	3.28e-05
GOTERM_BP	GO:0006629	lipid metabolic process	99	5.41575	2.65e-06	LOC_Os01g01710,LOC_Os01g04920,LOC_Os01g11660,LOC_Os01g12304,LOC_Os01g43140,LOC_Os01g50760,LOC_Os01g51610,LOC_Os01g55240,LOC_Os01g63580,LOC_Os01g67540,LOC_Os01g69080,LOC_Os02g09450,LOC_Os02g10760,LOC_Os02g12890,LOC_Os02g17780,LOC_Os02g21810,LOC_Os02g31030,LOC_Os02g37654,LOC_Os02g39155,LOC_Os02g40440,LOC_Os02g40784,LOC_Os02g44654,LOC_Os02g55910,LOC_Os03g02710,LOC_Os03g18010,LOC_Os03g18070,LOC_Os03g…	1828	1033	32072	1.68145	0.00144836	0.000284737	4.14e-05
GOTERM_MF	GO:0016798	hydrolase activity, acting on glycosyl bonds	35	1.91466	3.43e-06	LOC_Os01g18400,LOC_Os01g21070,LOC_Os01g33300,LOC_Os01g39830,LOC_Os01g49320,LOC_Os01g51570,LOC_Os01g71474,LOC_Os02g10300,LOC_Os02g12730,LOC_Os02g15690,LOC_Os02g50040,LOC_Os02g53820,LOC_Os03g46660,LOC_Os04g41970,LOC_Os05g12150,LOC_Os05g23924,LOC_Os05g50260,LOC_Os06g08090,LOC_Os06g34020,LOC_Os06g35320,LOC_Os06g39060,LOC_Os06g40890,LOC_Os06g46940,LOC_Os07g14160,LOC_Os07g19040,LOC_Os07g26900,LOC_Os07g…	1828	234	32072	2.62423	0.00187242	0.000354054	5.15e-05
GOTERM_BP	GO:0007165	signal transduction	136	7.43982	3.49e-06	LOC_Os01g04230,LOC_Os01g04330,LOC_Os01g04570,LOC_Os01g06280,LOC_Os01g06790,LOC_Os01g06876,LOC_Os01g06890,LOC_Os01g06900,LOC_Os01g09100,LOC_Os01g10890,LOC_Os01g25560,LOC_Os01g39600,LOC_Os01g45090,LOC_Os01g50080,LOC_Os01g55440,LOC_Os01g57560,LOC_Os01g58420,LOC_Os01g60060,LOC_Os01g60670,LOC_Os01g68020,LOC_Os01g69080,LOC_Os01g70870,LOC_Os01g72700,LOC_Os02g02490,LOC_Os02g10760,LOC_Os02g13780,LOC_Os02g…	1828	1560	32072	1.52955	0.00190386	0.000354054	5.15e-05
GOTERM_BP	GO:0009628	response to abiotic stimulus	177	9.68271	8.35e-06	LOC_Os01g03549,LOC_Os01g03640,LOC_Os01g04330,LOC_Os01g04370,LOC_Os01g18110,LOC_Os01g18170,LOC_Os01g19330,LOC_Os01g21250,LOC_Os01g44390,LOC_Os01g49320,LOC_Os01g50080,LOC_Os01g51570,LOC_Os01g52470,LOC_Os01g53630,LOC_Os01g54210,LOC_Os01g55240,LOC_Os01g60770,LOC_Os01g63270,LOC_Os01g66890,LOC_Os01g68020,LOC_Os01g71280,LOC_Os01g71474,LOC_Os02g02400,LOC_Os02g02560,LOC_Os02g07060,LOC_Os02g09150,LOC_Os02g…	1828	2194	32072	1.41542	0.00456161	0.000825981	0.000120042
GOTERM_BP	GO:0042545	cell wall modification	15	0.820569	1.1e-05	LOC_Os01g21034,LOC_Os01g53990,LOC_Os01g62260,LOC_Os01g65790,LOC_Os03g18860,LOC_Os03g19610,LOC_Os04g38560,LOC_Os04g46740,LOC_Os06g09340,LOC_Os06g48200,LOC_Os07g47830,LOC_Os08g34910,LOC_Os09g26360,LOC_Os11g45720,LOC_Os11g45730	1828	53	32072	4.96553	0.0059869	0.00105627	0.00015351
GOTERM_BP	GO:0043086	negative regulation of catalytic activity	23	1.25821	1.51e-05	LOC_Os01g14940,LOC_Os01g21034,LOC_Os01g50810,LOC_Os01g56320,LOC_Os01g58240,LOC_Os01g64860,LOC_Os01g65790,LOC_Os02g01310,LOC_Os03g01020,LOC_Os03g04950,LOC_Os03g18860,LOC_Os03g62210,LOC_Os04g38560,LOC_Os04g47150,LOC_Os05g20570,LOC_Os05g46530,LOC_Os06g09340,LOC_Os07g47830,LOC_Os08g34910,LOC_Os09g26360,LOC_Os09g30250,LOC_Os09g30458,LOC_Os11g45220	1828	126	32072	3.20263	0.0082397	0.00141738	0.000205993
GOTERM_BP	GO:0006817	phosphate ion transport	10	0.547046	1.92e-05	LOC_Os02g56510,LOC_Os03g05640,LOC_Os03g44810,LOC_Os03g58570,LOC_Os04g10750,LOC_Os04g10800,LOC_Os06g21920,LOC_Os06g29790,LOC_Os10g30770,LOC_Os10g30790	1828	21	32072	8.35469	0.0104632	0.00175596	0.000255199
GOTERM_MF	GO:0004857	enzyme inhibitor activity	17	0.929978	2.3e-05	LOC_Os01g14940,LOC_Os01g21034,LOC_Os01g50810,LOC_Os01g65790,LOC_Os02g01310,LOC_Os03g01020,LOC_Os03g18860,LOC_Os04g38560,LOC_Os05g20570,LOC_Os05g46530,LOC_Os06g09340,LOC_Os07g47830,LOC_Os08g04650,LOC_Os08g34910,LOC_Os09g26360,LOC_Os11g11710,LOC_Os11g45220	1828	74	32072	4.03058	0.0125698	0.00205928	0.000299282
GOTERM_MF	GO:0045330	aspartyl esterase activity	13	0.71116	2.4e-05	LOC_Os01g21034,LOC_Os01g53990,LOC_Os01g65790,LOC_Os03g18860,LOC_Os03g19610,LOC_Os04g38560,LOC_Os04g46740,LOC_Os06g09340,LOC_Os07g47830,LOC_Os08g34910,LOC_Os09g26360,LOC_Os11g45720,LOC_Os11g45730	1828	42	32072	5.43055	0.0131047	0.00209697	0.000304759
GOTERM_BP	GO:0009719	response to endogenous stimulus	123	6.72867	8.74e-05	LOC_Os01g04330,LOC_Os01g06280,LOC_Os01g09100,LOC_Os01g10890,LOC_Os01g19330,LOC_Os01g22680,LOC_Os01g37590,LOC_Os01g45090,LOC_Os01g50080,LOC_Os01g51610,LOC_Os01g52660,LOC_Os01g55440,LOC_Os01g55940,LOC_Os01g58420,LOC_Os01g60770,LOC_Os01g64660,LOC_Os01g66890,LOC_Os01g68020,LOC_Os01g69080,LOC_Os01g70870,LOC_Os02g02400,LOC_Os02g10760,LOC_Os02g13520,LOC_Os02g17780,LOC_Os02g36890,LOC_Os02g40710,LOC_Os02g…	1828	1486	32072	1.45223	0.0477356	0.00746492	0.0010849
GOTERM_BP	GO:0010264	myo-inositol hexakisphosphate biosynthetic process	11	0.601751	0.000113608	LOC_Os01g60830,LOC_Os03g17600,LOC_Os03g39000,LOC_Os04g37619,LOC_Os05g05600,LOC_Os05g35410,LOC_Os05g43650,LOC_Os05g50930,LOC_Os07g22930,LOC_Os09g12540,LOC_Os10g22450	1828	35	32072	5.5141	0.0620302	0.00948476	0.00137845
GOTERM_MF	GO:0019825	oxygen binding	40	2.18818	0.000167119	LOC_Os01g12740,LOC_Os01g12770,LOC_Os01g36350,LOC_Os01g43740,LOC_Os01g59050,LOC_Os02g09200,LOC_Os02g09220,LOC_Os02g09240,LOC_Os02g12890,LOC_Os02g21810,LOC_Os02g30100,LOC_Os02g30110,LOC_Os02g44654,LOC_Os03g13140,LOC_Os03g30420,LOC_Os03g39650,LOC_Os03g55230,LOC_Os04g01140,LOC_Os04g39430,LOC_Os04g40460,LOC_Os04g47250,LOC_Os06g01250,LOC_Os06g02019,LOC_Os06g36920,LOC_Os06g41070,LOC_Os06g43510,LOC_Os06g…	1828	351	32072	1.99941	0.0912468	0.0136488	0.00198363
GOTERM_MF	GO:0043169	cation binding	26	1.42232	0.000239501	LOC_Os01g39830,LOC_Os01g51570,LOC_Os01g71474,LOC_Os02g12730,LOC_Os02g32660,LOC_Os03g10469,LOC_Os03g12620,LOC_Os03g46660,LOC_Os04g40490,LOC_Os05g15850,LOC_Os05g23924,LOC_Os06g34020,LOC_Os06g39060,LOC_Os06g46940,LOC_Os07g01770,LOC_Os07g19040,LOC_Os07g35480,LOC_Os07g38790,LOC_Os07g43390,LOC_Os08g43570,LOC_Os09g29404,LOC_Os09g33710,LOC_Os10g22520,LOC_Os10g32810,LOC_Os11g27400,LOC_Os11g47600	1828	189	32072	2.41358	0.130768	0.0191443	0.00278229
GOTERM_BP	GO:0016310	phosphorylation	99	5.41575	0.000250423	LOC_Os01g04570,LOC_Os01g06280,LOC_Os01g10890,LOC_Os01g21970,LOC_Os01g39970,LOC_Os01g41730,LOC_Os01g47470,LOC_Os01g48000,LOC_Os01g55440,LOC_Os01g56764,LOC_Os01g57560,LOC_Os01g59360,LOC_Os01g60670,LOC_Os01g70410,LOC_Os02g12660,LOC_Os02g26160,LOC_Os02g56370,LOC_Os02g57440,LOC_Os02g58390,LOC_Os03g03280,LOC_Os03g03570,LOC_Os03g12520,LOC_Os03g12680,LOC_Os03g13080,LOC_Os03g14710,LOC_Os03g18170,LOC_Os03g…	1828	1174	32072	1.47951	0.136731	0.0196002	0.00284856
GOTERM_CC	GO:0009505	plant-type cell wall	28	1.53173	0.000274408	LOC_Os01g21034,LOC_Os01g39830,LOC_Os01g56320,LOC_Os01g56880,LOC_Os01g62260,LOC_Os01g69240,LOC_Os02g58720,LOC_Os03g08790,LOC_Os03g19610,LOC_Os03g59300,LOC_Os03g60720,LOC_Os04g32540,LOC_Os04g45270,LOC_Os04g46740,LOC_Os06g04250,LOC_Os06g08090,LOC_Os06g09340,LOC_Os06g46940,LOC_Os06g48200,LOC_Os07g26900,LOC_Os07g39740,LOC_Os07g41310,LOC_Os07g46480,LOC_Os07g47830,LOC_Os10g02040,LOC_Os10g35110,LOC_Os11g…	1828	214	32072	2.29559	0.149827	0.0210392	0.00305769
GOTERM_MF	GO:0005524	ATP binding	232	12.6915	0.000283953	LOC_Os01g01302,LOC_Os01g04570,LOC_Os01g06280,LOC_Os01g09830,LOC_Os01g10890,LOC_Os01g13270,LOC_Os01g16400,LOC_Os01g21970,LOC_Os01g26300,LOC_Os01g39600,LOC_Os01g39970,LOC_Os01g41200,LOC_Os01g41730,LOC_Os01g43580,LOC_Os01g44110,LOC_Os01g47470,LOC_Os01g48000,LOC_Os01g50080,LOC_Os01g50420,LOC_Os01g54080,LOC_Os01g55440,LOC_Os01g56764,LOC_Os01g57560,LOC_Os01g57940,LOC_Os01g59360,LOC_Os01g60060,LOC_Os01g…	1828	3219	32072	1.26449	0.155038	0.0213356	0.00310077
GOTERM_BP	GO:0009860	pollen tube growth	16	0.875274	0.000331338	LOC_Os01g05840,LOC_Os01g13270,LOC_Os01g48410,LOC_Os01g55520,LOC_Os02g17240,LOC_Os03g14090,LOC_Os04g02690,LOC_Os05g14750,LOC_Os05g20150,LOC_Os07g41590,LOC_Os08g43500,LOC_Os10g32590,LOC_Os10g34680,LOC_Os12g04700,LOC_Os12g06570,LOC_Os12g42660	1828	86	32072	3.26416	0.180911	0.0240132	0.00348991
GOTERM_MF	GO:0004185	serine-type carboxypeptidase activity	14	0.765864	0.000332372	LOC_Os01g11670,LOC_Os03g26930,LOC_Os03g27480,LOC_Os03g52040,LOC_Os04g09720,LOC_Os04g32540,LOC_Os05g14750,LOC_Os05g18604,LOC_Os06g43930,LOC_Os08g44640,LOC_Os10g01134,LOC_Os10g39150,LOC_Os11g24510,LOC_Os11g27329	1828	67	32072	3.66609	0.181475	0.0240132	0.00348991
GOTERM_MF	GO:0016762	xyloglucan:xyloglucosyl transferase activity	9	0.492341	0.000665018	LOC_Os02g03550,LOC_Os03g01800,LOC_Os03g13570,LOC_Os04g51450,LOC_Os04g53950,LOC_Os06g48200,LOC_Os07g29750,LOC_Os09g23220,LOC_Os10g02770	1828	29	32072	5.44496	0.3631	0.0462667	0.00672408
GOTERM_BP	GO:0006073	cellular glucan metabolic process	9	0.492341	0.000665018	LOC_Os02g03550,LOC_Os03g01800,LOC_Os03g13570,LOC_Os04g51450,LOC_Os04g53950,LOC_Os06g48200,LOC_Os07g29750,LOC_Os09g23220,LOC_Os10g02770	1828	29	32072	5.44496	0.3631	0.0462667	0.00672408
GOTERM_BP	GO:0009737	response to abscisic acid	31	1.69584	0.000678911	LOC_Os01g10890,LOC_Os02g32740,LOC_Os02g40710,LOC_Os02g45670,LOC_Os02g55400,LOC_Os03g05640,LOC_Os03g42810,LOC_Os03g43670,LOC_Os03g57950,LOC_Os04g10750,LOC_Os04g16450,LOC_Os04g37619,LOC_Os04g44060,LOC_Os05g04550,LOC_Os05g11790,LOC_Os05g35410,LOC_Os05g49170,LOC_Os06g04070,LOC_Os06g08310,LOC_Os07g09420,LOC_Os07g49270,LOC_Os09g21710,LOC_Os09g25600,LOC_Os10g30770,LOC_Os10g30790,LOC_Os10g33210,LOC_Os10g…	1828	265	32072	2.05242	0.370685	0.0463744	0.00673973
GOTERM_MF	GO:0005488	binding	294	16.0832	0.000824379	LOC_Os01g01710,LOC_Os01g03490,LOC_Os01g03549,LOC_Os01g03640,LOC_Os01g03840,LOC_Os01g04330,LOC_Os01g05650,LOC_Os01g05840,LOC_Os01g08220,LOC_Os01g11460,LOC_Os01g12490,LOC_Os01g12740,LOC_Os01g12770,LOC_Os01g18110,LOC_Os01g18170,LOC_Os01g20910,LOC_Os01g27880,LOC_Os01g36350,LOC_Os01g41200,LOC_Os01g41710,LOC_Os01g43740,LOC_Os01g48710,LOC_Os01g49280,LOC_Os01g49320,LOC_Os01g52240,LOC_Os01g52470,LOC_Os01g…	1828	4287	32072	1.20322	0.450111	0.0553054	0.0080377
GOTERM_MF	GO:0004497	monooxygenase activity	39	2.13348	0.000998269	LOC_Os01g12490,LOC_Os01g12740,LOC_Os01g12770,LOC_Os01g43740,LOC_Os02g09200,LOC_Os02g09220,LOC_Os02g09240,LOC_Os02g12890,LOC_Os02g21810,LOC_Os02g30100,LOC_Os02g30110,LOC_Os02g44654,LOC_Os03g05900,LOC_Os03g30420,LOC_Os03g39650,LOC_Os03g55230,LOC_Os04g01140,LOC_Os04g34580,LOC_Os04g37619,LOC_Os04g39430,LOC_Os04g47250,LOC_Os06g01250,LOC_Os06g02019,LOC_Os06g36920,LOC_Os06g41070,LOC_Os06g43510,LOC_Os06g…	1828	375	32072	1.82467	0.545055	0.0657962	0.00956236
GOTERM_MF	GO:0022857	transmembrane transporter activity	15	0.820569	0.00114756	LOC_Os02g06540,LOC_Os02g17500,LOC_Os03g05640,LOC_Os03g12790,LOC_Os03g43720,LOC_Os04g10750,LOC_Os04g10800,LOC_Os04g37980,LOC_Os04g37990,LOC_Os06g21920,LOC_Os07g39350,LOC_Os08g08070,LOC_Os10g30770,LOC_Os10g30790,LOC_Os11g28610	1828	88	32072	2.9906	0.626567	0.0743319	0.0108029
GOTERM_MF	GO:0016788	hydrolase activity, acting on ester bonds	23	1.25821	0.00122691	LOC_Os01g11660,LOC_Os01g12304,LOC_Os02g39155,LOC_Os02g40440,LOC_Os03g19670,LOC_Os03g25030,LOC_Os03g38350,LOC_Os03g47940,LOC_Os03g62740,LOC_Os03g64170,LOC_Os04g42860,LOC_Os04g55850,LOC_Os05g11910,LOC_Os05g34700,LOC_Os06g03900,LOC_Os06g05550,LOC_Os06g43044,LOC_Os07g39740,LOC_Os09g04710,LOC_Os11g02580,LOC_Os11g38050,LOC_Os11g48070,LOC_Os12g17570	1828	178	32072	2.26703	0.669895	0.0781251	0.0113542
GOTERM_BP	GO:0007154	cell communication	33	1.80525	0.00138032	LOC_Os01g03549,LOC_Os01g03640,LOC_Os01g04920,LOC_Os01g08020,LOC_Os01g21250,LOC_Os01g49320,LOC_Os01g52230,LOC_Os02g02400,LOC_Os02g10780,LOC_Os02g13290,LOC_Os02g55910,LOC_Os02g56510,LOC_Os03g03910,LOC_Os03g21960,LOC_Os03g29250,LOC_Os03g58570,LOC_Os04g02050,LOC_Os04g58390,LOC_Os05g15850,LOC_Os05g49170,LOC_Os06g29790,LOC_Os06g40120,LOC_Os07g19040,LOC_Os07g43670,LOC_Os07g48790,LOC_Os08g05580,LOC_Os08g…	1828	304	32072	1.90454	0.753655	0.0864286	0.0125609
GOTERM_BP	GO:0009991	response to extracellular stimulus	33	1.80525	0.00144822	LOC_Os01g03549,LOC_Os01g03640,LOC_Os01g04920,LOC_Os01g08020,LOC_Os01g21250,LOC_Os01g49320,LOC_Os01g52230,LOC_Os02g02400,LOC_Os02g10780,LOC_Os02g13290,LOC_Os02g55910,LOC_Os02g56510,LOC_Os03g03910,LOC_Os03g21960,LOC_Os03g29250,LOC_Os03g58570,LOC_Os04g02050,LOC_Os04g58390,LOC_Os05g15850,LOC_Os05g49170,LOC_Os06g29790,LOC_Os06g40120,LOC_Os07g19040,LOC_Os07g43670,LOC_Os07g48790,LOC_Os08g05580,LOC_Os08g…	1828	305	32072	1.8983	0.79073	0.0875435	0.012723
GOTERM_MF	GO:0005509	calcium ion binding	46	2.51641	0.00145245	LOC_Os01g04330,LOC_Os01g59360,LOC_Os02g14980,LOC_Os02g50140,LOC_Os02g50174,LOC_Os02g50770,LOC_Os02g56370,LOC_Os02g58720,LOC_Os03g02920,LOC_Os03g05770,LOC_Os03g48270,LOC_Os03g57510,LOC_Os04g30160,LOC_Os04g51030,LOC_Os04g56230,LOC_Os04g57350,LOC_Os04g59190,LOC_Os05g04490,LOC_Os05g07880,LOC_Os05g26660,LOC_Os05g43170,LOC_Os06g20150,LOC_Os06g32990,LOC_Os06g35520,LOC_Os06g40180,LOC_Os06g46950,LOC_Os06g…	1828	478	32072	1.68842	0.793037	0.0875435	0.012723
GOTERM_MF	GO:0052689	carboxylic ester hydrolase activity	10	0.547046	0.00146803	LOC_Os02g43340,LOC_Os03g19670,LOC_Os03g62740,LOC_Os05g34700,LOC_Os07g41590,LOC_Os09g39580,LOC_Os11g43760,LOC_Os11g48070,LOC_Os12g17570,LOC_Os12g36770	1828	42	32072	4.17735	0.801546	0.0875435	0.012723
GOTERM_MF	GO:0004601	peroxidase activity	23	1.25821	0.0015846	LOC_Os01g63620,LOC_Os02g02400,LOC_Os02g50770,LOC_Os02g58720,LOC_Os03g02920,LOC_Os03g03910,LOC_Os03g05770,LOC_Os04g59190,LOC_Os05g04490,LOC_Os06g20150,LOC_Os06g32990,LOC_Os06g35520,LOC_Os06g48030,LOC_Os07g48020,LOC_Os07g48060,LOC_Os08g41090,LOC_Os09g29490,LOC_Os09g32964,LOC_Os10g02040,LOC_Os10g35800,LOC_Os11g43980,LOC_Os12g26290,LOC_Os12g35610	1828	182	32072	2.21721	0.865191	0.0930181	0.0135186
GOTERM_MF	GO:0016705	oxidoreductase activity, acting on paired donors, with incorporation or reduction of molecular oxygen	35	1.91466	0.00174147	LOC_Os01g12740,LOC_Os01g12770,LOC_Os01g43740,LOC_Os01g55795,LOC_Os02g09200,LOC_Os02g09220,LOC_Os02g09240,LOC_Os02g12890,LOC_Os02g21810,LOC_Os02g30100,LOC_Os02g30110,LOC_Os02g44654,LOC_Os03g30420,LOC_Os03g39650,LOC_Os03g55230,LOC_Os04g01140,LOC_Os04g39430,LOC_Os04g47250,LOC_Os06g01250,LOC_Os06g02019,LOC_Os06g36920,LOC_Os06g41070,LOC_Os06g43510,LOC_Os06g46680,LOC_Os07g33620,LOC_Os07g48330,LOC_Os08g…	1828	335	32072	1.83304	0.950845	0.100654	0.0146284
GOTERM_BP	GO:0009753	response to jasmonic acid	13	0.71116	0.00197422	LOC_Os01g37590,LOC_Os02g41510,LOC_Os02g45670,LOC_Os03g16150,LOC_Os03g42810,LOC_Os05g02060,LOC_Os05g02530,LOC_Os06g04070,LOC_Os08g33660,LOC_Os09g21710,LOC_Os09g36730,LOC_Os10g33210,LOC_Os12g08810	1828	73	32072	3.12443	1	0.112377	0.0163322
GOTERM_MF	GO:0016757	transferase activity, transferring glycosyl groups	42	2.29759	0.0020856	LOC_Os01g08090,LOC_Os01g41430,LOC_Os01g45110,LOC_Os01g52710,LOC_Os01g53460,LOC_Os01g63270,LOC_Os01g65590,LOC_Os01g69030,LOC_Os02g11640,LOC_Os02g32660,LOC_Os02g36770,LOC_Os02g51070,LOC_Os02g55910,LOC_Os02g58480,LOC_Os03g49524,LOC_Os03g55030,LOC_Os03g62090,LOC_Os04g24430,LOC_Os04g35030,LOC_Os04g46980,LOC_Os05g08740,LOC_Os05g30750,LOC_Os06g04200,LOC_Os06g06560,LOC_Os06g10930,LOC_Os06g18010,LOC_Os06g…	1828	433	32072	1.70181	1	0.116946	0.0169961
GOTERM_MF	GO:0016829	lyase activity	24	1.31291	0.00252855	LOC_Os02g12300,LOC_Os02g17780,LOC_Os02g39790,LOC_Os03g13300,LOC_Os03g14450,LOC_Os03g22620,LOC_Os03g22634,LOC_Os03g58300,LOC_Os04g27430,LOC_Os04g27670,LOC_Os04g37460,LOC_Os06g04070,LOC_Os06g38510,LOC_Os06g40640,LOC_Os07g49250,LOC_Os08g02700,LOC_Os08g04500,LOC_Os08g07080,LOC_Os08g07100,LOC_Os08g31030,LOC_Os09g28910,LOC_Os10g08022,LOC_Os10g31910,LOC_Os12g33610	1828	202	32072	2.08454	1	0.139698	0.0203028
GOTERM_BP	GO:0080167	response to karrikin	18	0.984683	0.00265946	LOC_Os01g03549,LOC_Os01g03640,LOC_Os01g49720,LOC_Os02g40710,LOC_Os03g18070,LOC_Os03g37411,LOC_Os03g37470,LOC_Os03g39000,LOC_Os06g04070,LOC_Os06g04250,LOC_Os06g07600,LOC_Os06g41700,LOC_Os07g10840,LOC_Os10g08022,LOC_Os10g38580,LOC_Os10g38610,LOC_Os10g38740,LOC_Os12g42020	1828	131	32072	2.41074	1	0.143313	0.0208282
GOTERM_BP	GO:0016043	cellular component organization	111	6.07221	0.00269039	LOC_Os01g01302,LOC_Os01g06280,LOC_Os01g13270,LOC_Os01g52230,LOC_Os01g58194,LOC_Os01g59360,LOC_Os01g60770,LOC_Os01g60810,LOC_Os01g65590,LOC_Os01g68540,LOC_Os01g68890,LOC_Os01g71270,LOC_Os02g03400,LOC_Os02g04510,LOC_Os02g07900,LOC_Os02g13290,LOC_Os02g17240,LOC_Os02g32740,LOC_Os02g36890,LOC_Os02g40710,LOC_Os02g40770,LOC_Os02g42160,LOC_Os02g42820,LOC_Os02g48730,LOC_Os02g57120,LOC_Os03g01610,LOC_Os03g…	1828	1455	32072	1.33847	1	0.143313	0.0208282
GOTERM_MF	GO:0046872	metal ion binding	163	8.91685	0.00270842	LOC_Os01g01710,LOC_Os01g03490,LOC_Os01g03640,LOC_Os01g03840,LOC_Os01g04330,LOC_Os01g05650,LOC_Os01g09830,LOC_Os01g11460,LOC_Os01g12740,LOC_Os01g12770,LOC_Os01g18170,LOC_Os01g20910,LOC_Os01g25484,LOC_Os01g41200,LOC_Os01g41710,LOC_Os01g43740,LOC_Os01g48710,LOC_Os01g52240,LOC_Os01g56880,LOC_Os01g57940,LOC_Os01g61070,LOC_Os01g63190,LOC_Os01g64620,LOC_Os01g64660,LOC_Os01g69080,LOC_Os01g70100,LOC_Os01g…	1828	2266	32072	1.26205	1	0.143313	0.0208282
GOTERM_MF	GO:0050660	flavin adenine dinucleotide binding	22	1.2035	0.00276067	LOC_Os01g12490,LOC_Os01g71310,LOC_Os02g53130,LOC_Os03g05900,LOC_Os03g36530,LOC_Os03g52910,LOC_Os04g36720,LOC_Os05g26660,LOC_Os05g31040,LOC_Os05g48200,LOC_Os06g35560,LOC_Os06g35590,LOC_Os08g04630,LOC_Os08g06170,LOC_Os08g31030,LOC_Os08g36480,LOC_Os09g19930,LOC_Os09g37620,LOC_Os09g39190,LOC_Os10g33520,LOC_Os10g34230,LOC_Os12g35610	1828	179	32072	2.15635	1	0.144049	0.0209351
GOTERM_BP	GO:0019725	cellular homeostasis	27	1.47702	0.00286749	LOC_Os01g05650,LOC_Os01g09830,LOC_Os01g14520,LOC_Os01g27140,LOC_Os01g28840,LOC_Os02g02400,LOC_Os02g51370,LOC_Os02g54640,LOC_Os03g03910,LOC_Os04g37920,LOC_Os05g02240,LOC_Os05g09500,LOC_Os05g10930,LOC_Os05g11320,LOC_Os05g11990,LOC_Os05g31730,LOC_Os05g35410,LOC_Os06g08900,LOC_Os06g46310,LOC_Os06g46670,LOC_Os07g01310,LOC_Os07g06600,LOC_Os07g48510,LOC_Os08g39370,LOC_Os08g44400,LOC_Os10g11140,LOC_Os12g…	1828	242	32072	1.95748	1	0.147047	0.0213708
GOTERM_BP	GO:0010143	cutin biosynthetic process	5	0.273523	0.00293555	LOC_Os01g63580,LOC_Os05g04170,LOC_Os06g40150,LOC_Os08g44840,LOC_Os11g35400	1828	8	32072	10.9655	1	0.147047	0.0213708
GOTERM_BP	GO:0070417	cellular response to cold	5	0.273523	0.00293555	LOC_Os02g10780,LOC_Os03g29250,LOC_Os05g49170,LOC_Os06g40120,LOC_Os10g25310	1828	8	32072	10.9655	1	0.147047	0.0213708
GOTERM_BP	GO:0000272	polysaccharide catabolic process	10	0.547046	0.00366815	LOC_Os01g18400,LOC_Os01g21070,LOC_Os02g50040,LOC_Os02g53820,LOC_Os04g41970,LOC_Os05g12150,LOC_Os09g29404,LOC_Os09g36060,LOC_Os10g11140,LOC_Os10g32810	1828	49	32072	3.58058	1	0.181327	0.0263528
GOTERM_MF	GO:0016614	oxidoreductase activity, acting on CH-OH group of donors	11	0.601751	0.00375178	LOC_Os01g71280,LOC_Os01g71310,LOC_Os03g36530,LOC_Os05g31040,LOC_Os06g35560,LOC_Os06g35590,LOC_Os08g06170,LOC_Os08g31030,LOC_Os09g19930,LOC_Os10g33520,LOC_Os10g34230	1828	59	32072	3.27108	1	0.183052	0.0266035
GOTERM_BP	GO:0006464	cellular protein modification process	202	11.0503	0.00428366	LOC_Os01g04230,LOC_Os01g04570,LOC_Os01g06280,LOC_Os01g10890,LOC_Os01g20910,LOC_Os01g21970,LOC_Os01g26300,LOC_Os01g39600,LOC_Os01g39970,LOC_Os01g41730,LOC_Os01g44110,LOC_Os01g46950,LOC_Os01g47470,LOC_Os01g48000,LOC_Os01g49210,LOC_Os01g50420,LOC_Os01g53630,LOC_Os01g55440,LOC_Os01g57560,LOC_Os01g57940,LOC_Os01g58140,LOC_Os01g59360,LOC_Os01g60060,LOC_Os01g60670,LOC_Os01g60810,LOC_Os01g60860,LOC_Os01g…	1828	2920	32072	1.21372	1	0.206324	0.0299856
GOTERM_BP	GO:0032940	secretion by cell	8	0.437637	0.00439599	LOC_Os01g41430,LOC_Os01g55940,LOC_Os01g71310,LOC_Os06g02019,LOC_Os09g36680,LOC_Os10g34230,LOC_Os10g35110,LOC_Os11g35500	1828	32	32072	4.38621	1	0.209054	0.0303824
GOTERM_MF	GO:0005089	Rho guanyl-nucleotide exchange factor activity	6	0.328228	0.00445599	LOC_Os01g48410,LOC_Os01g55520,LOC_Os01g62990,LOC_Os02g17240,LOC_Os02g47420,LOC_Os07g29780	1828	16	32072	6.57932	1	0.209258	0.0304121
GOTERM_BP	GO:0009250	glucan biosynthetic process	5	0.273523	0.00544445	LOC_Os02g51070,LOC_Os04g53310,LOC_Os06g04200,LOC_Os06g06560,LOC_Os07g22930	1828	10	32072	8.77243	1	0.249442	0.0362521
GOTERM_CC	GO:0009501	amyloplast	5	0.273523	0.00544445	LOC_Os02g51070,LOC_Os06g04200,LOC_Os06g06560,LOC_Os07g43390,LOC_Os09g12660	1828	10	32072	8.77243	1	0.249442	0.0362521
GOTERM_MF	GO:0015293	symporter activity	7	0.382932	0.0055938	LOC_Os03g05640,LOC_Os04g10750,LOC_Os04g10800,LOC_Os06g21920,LOC_Os10g30770,LOC_Os10g30790,LOC_Os11g06820	1828	25	32072	4.91256	1	0.253196	0.0367977
GOTERM_MF	GO:0003779	actin binding	12	0.656455	0.00588025	LOC_Os01g69240,LOC_Os03g64290,LOC_Os04g38810,LOC_Os04g51440,LOC_Os05g06110,LOC_Os05g32760,LOC_Os06g03220,LOC_Os07g30090,LOC_Os08g34780,LOC_Os10g17660,LOC_Os10g20710,LOC_Os12g43340	1828	74	32072	2.84511	1	0.262993	0.0382216
GOTERM_MF	GO:0016758	transferase activity, transferring hexosyl groups	22	1.2035	0.00637185	LOC_Os01g08090,LOC_Os01g41430,LOC_Os01g45110,LOC_Os01g52710,LOC_Os01g53460,LOC_Os02g11640,LOC_Os02g55910,LOC_Os03g49524,LOC_Os03g55030,LOC_Os04g46980,LOC_Os05g08740,LOC_Os06g18010,LOC_Os06g39330,LOC_Os07g10160,LOC_Os07g13770,LOC_Os07g32020,LOC_Os07g37690,LOC_Os08g20420,LOC_Os09g16030,LOC_Os09g16090,LOC_Os09g30510,LOC_Os12g37510	1828	194	32072	1.98962	1	0.281627	0.0409297
GOTERM_BP	GO:0006855	drug transmembrane transport	11	0.601751	0.00684251	LOC_Os02g11760,LOC_Os03g12790,LOC_Os03g37411,LOC_Os03g37470,LOC_Os03g42830,LOC_Os04g30490,LOC_Os04g48290,LOC_Os08g44870,LOC_Os09g37600,LOC_Os10g13830,LOC_Os12g36660	1828	65	32072	2.96913	1	0.297722	0.0432688
GOTERM_BP	GO:0030154	cell differentiation	51	2.78993	0.00708238	LOC_Os01g01302,LOC_Os01g03840,LOC_Os01g11550,LOC_Os01g13270,LOC_Os01g13390,LOC_Os01g50080,LOC_Os01g55100,LOC_Os01g55520,LOC_Os01g58194,LOC_Os01g59360,LOC_Os01g68540,LOC_Os01g68890,LOC_Os02g16909,LOC_Os02g17240,LOC_Os02g35660,LOC_Os02g42950,LOC_Os02g48730,LOC_Os03g14090,LOC_Os03g19560,LOC_Os03g24170,LOC_Os03g58600,LOC_Os04g50860,LOC_Os04g51440,LOC_Os05g10840,LOC_Os05g14750,LOC_Os05g24780,LOC_Os05g…	1828	597	32072	1.49881	1	0.297722	0.0432688
GOTERM_MF	GO:0009011	starch synthase activity	5	0.273523	0.00711098	LOC_Os02g51070,LOC_Os04g53310,LOC_Os06g04200,LOC_Os06g06560,LOC_Os07g22930	1828	11	32072	7.97494	1	0.297722	0.0432688
GOTERM_BP	GO:0080040	positive regulation of cellular response to phosphate starvation	4	0.218818	0.00713222	LOC_Os02g10780,LOC_Os03g29250,LOC_Os06g40120,LOC_Os10g25310	1828	5	32072	14.0359	1	0.297722	0.0432688
GOTERM_BP	GO:0030643	cellular phosphate ion homeostasis	4	0.218818	0.00713222	LOC_Os03g13540,LOC_Os10g02750,LOC_Os11g34710,LOC_Os11g34720	1828	5	32072	14.0359	1	0.297722	0.0432688
GOTERM_MF	GO:0003993	acid phosphatase activity	9	0.492341	0.00798148	LOC_Os01g09540,LOC_Os01g56880,LOC_Os03g13540,LOC_Os10g02750,LOC_Os11g05400,LOC_Os11g34710,LOC_Os11g34720,LOC_Os12g12860,LOC_Os12g44020	1828	46	32072	3.43269	1	0.329511	0.0478889

## Sheet: S3
Table S3 Overlapping and nonoverlapping GO terms among regions 4, 5, and 7. BP, biological processes; MF, molecular functions; CC, cellular components.
Region g1
Type	Term	Description	Count	%	PValue	Genes	ListTotal	PopHits	PopTotal	FoldChange	Bonferroni	Benjamini	FDR	region
GOTERM_MF	GO:0004022	alcohol dehydrogenase (NAD) activity	12	1.0118	5.49e-06	LOC_Os03g18740,LOC_Os04g30760,LOC_Os04g52400,LOC_Os07g37420,LOC_Os07g40250,LOC_Os07g46910,LOC_Os09g04730,LOC_Os09g28570,LOC_Os11g10520,LOC_Os11g25160,LOC_Os11g25700,LOC_Os11g43200	1186	47	32072	6.90438	0.0020767	0.00104049	0.000159746	4
GOTERM_BP	GO:0009239	enterobactin biosynthetic process	14	1.18044	1.09e-05	LOC_Os02g42790,LOC_Os02g47350,LOC_Os03g18740,LOC_Os04g30760,LOC_Os04g52400,LOC_Os07g37420,LOC_Os07g40250,LOC_Os07g46910,LOC_Os07g48640,LOC_Os09g04730,LOC_Os09g28570,LOC_Os11g25160,LOC_Os11g25700,LOC_Os11g43200	1186	73	32072	5.18617	0.0041161	0.00148944	0.000228672	4
GOTERM_MF	GO:0008667	2,3-dihydro-2,3-dihydroxybenzoate dehydrogenase activity	14	1.18044	1.09e-05	LOC_Os02g42790,LOC_Os02g47350,LOC_Os03g18740,LOC_Os04g30760,LOC_Os04g52400,LOC_Os07g37420,LOC_Os07g40250,LOC_Os07g46910,LOC_Os07g48640,LOC_Os09g04730,LOC_Os09g28570,LOC_Os11g25160,LOC_Os11g25700,LOC_Os11g43200	1186	73	32072	5.18617	0.0041161	0.00148944	0.000228672	4
GOTERM_BP	GO:0006633	fatty acid biosynthetic process	19	1.60202	2.65e-05	LOC_Os01g27230,LOC_Os01g31760,LOC_Os01g47080,LOC_Os01g65830,LOC_Os03g18590,LOC_Os03g63930,LOC_Os04g30760,LOC_Os04g55060,LOC_Os05g22940,LOC_Os05g36000,LOC_Os05g49900,LOC_Os06g05130,LOC_Os06g09630,LOC_Os06g11240,LOC_Os07g49310,LOC_Os08g14490,LOC_Os08g23810,LOC_Os09g36860,LOC_Os11g32650	1186	147	32072	3.49524	0.0100181	0.00310726	0.000477054	4
GOTERM_BP	GO:0006200	ATP catabolic process	20	1.68634	7.64e-05	LOC_Os01g07870,LOC_Os01g08260,LOC_Os01g25386,LOC_Os01g34970,LOC_Os01g52560,LOC_Os02g08490,LOC_Os03g01120,LOC_Os03g08380,LOC_Os04g13220,LOC_Os04g40570,LOC_Os04g56320,LOC_Os04g57140,LOC_Os05g47500,LOC_Os06g12370,LOC_Os07g09384,LOC_Os07g33780,LOC_Os08g05710,LOC_Os08g30780,LOC_Os08g43120,LOC_Os11g39020	1186	176	32072	3.07297	0.0288808	0.00752454	0.00115523	4
GOTERM_MF	GO:0016887	ATPase activity	21	1.77066	0.000509689	LOC_Os01g07870,LOC_Os01g08260,LOC_Os01g25386,LOC_Os01g34970,LOC_Os01g52560,LOC_Os02g08490,LOC_Os02g32520,LOC_Os03g01120,LOC_Os03g08380,LOC_Os04g13220,LOC_Os04g40570,LOC_Os04g56320,LOC_Os04g57140,LOC_Os05g47500,LOC_Os06g12370,LOC_Os07g09384,LOC_Os07g33780,LOC_Os08g05710,LOC_Os08g30780,LOC_Os08g43120,LOC_Os11g39020	1186	224	32072	2.5352	0.192662	0.0358541	0.00550464	4
GOTERM_BP	GO:0009751	response to salicylic acid	10	0.84317	0.000920189	LOC_Os01g63690,LOC_Os02g42870,LOC_Os03g56160,LOC_Os04g44900,LOC_Os04g44910,LOC_Os07g03900,LOC_Os07g38800,LOC_Os07g38810,LOC_Os08g43550,LOC_Os10g33170	1186	62	32072	4.36164	0.347831	0.0580917	0.00891875	4
GOTERM_MF	GO:0050662	coenzyme binding	15	1.26476	0.00119229	LOC_Os01g58740,LOC_Os01g61230,LOC_Os01g74000,LOC_Os01g74660,LOC_Os02g35500,LOC_Os02g54890,LOC_Os02g56460,LOC_Os03g29150,LOC_Os07g40250,LOC_Os07g40986,LOC_Os08g41440,LOC_Os09g31502,LOC_Os11g25160,LOC_Os12g08060,LOC_Os12g23180	1186	139	32072	2.91822	0.450686	0.0715979	0.0109923	4
GOTERM_CC	GO:0009288	bacterial-type flagellum	8	0.674536	0.00147116	LOC_Os01g72530,LOC_Os01g72540,LOC_Os01g72550,LOC_Os03g21380,LOC_Os04g41540,LOC_Os05g13580,LOC_Os05g31620,LOC_Os12g08060	1186	41	32072	5.27652	0.556099	0.0842352	0.0129325	4
GOTERM_MF	GO:0042626	ATPase activity, coupled to transmembrane movement of substances	10	0.84317	0.00180649	LOC_Os01g07870,LOC_Os01g08260,LOC_Os01g25386,LOC_Os01g34970,LOC_Os03g08380,LOC_Os03g18790,LOC_Os04g13220,LOC_Os04g40570,LOC_Os05g47500,LOC_Os08g05710	1186	69	32072	3.91915	0.682851	0.101084	0.0155193	4
GOTERM_MF	GO:0042802	identical protein binding	12	1.0118	0.00333362	LOC_Os01g52750,LOC_Os01g58270,LOC_Os01g64850,LOC_Os02g10520,LOC_Os02g17090,LOC_Os02g53860,LOC_Os03g02750,LOC_Os03g44420,LOC_Os03g55200,LOC_Os04g03796,LOC_Os04g45210,LOC_Os04g47160	1186	107	32072	3.03277	1	0.174631	0.0268108	4
GOTERM_MF	GO:0004758	serine C-palmitoyltransferase activity	4	0.337268	0.00448681	LOC_Os01g70380,LOC_Os02g56300,LOC_Os10g11200,LOC_Os11g31640	1186	7	32072	15.4527	1	0.216605	0.0332552	4
GOTERM_BP	GO:0006096	glycolytic process	15	1.26476	0.00530265	LOC_Os01g02880,LOC_Os01g47080,LOC_Os01g62420,LOC_Os01g67860,LOC_Os02g51590,LOC_Os03g44300,LOC_Os03g44420,LOC_Os03g46910,LOC_Os05g49880,LOC_Os06g01590,LOC_Os06g04510,LOC_Os06g45710,LOC_Os08g33720,LOC_Os09g20820,LOC_Os12g42230	1186	166	32072	2.44357	1	0.234806	0.0360495	4
GOTERM_BP	GO:0001539	cilium or flagellum-dependent cell motility	8	0.674536	0.00534066	LOC_Os01g72530,LOC_Os01g72540,LOC_Os01g72550,LOC_Os03g21380,LOC_Os04g41540,LOC_Os05g13580,LOC_Os05g31620,LOC_Os12g08060	1186	53	32072	4.08184	1	0.234806	0.0360495	4
GOTERM_MF	GO:0008233	peptidase activity	27	2.27656	0.00552769	LOC_Os01g52750,LOC_Os01g58270,LOC_Os02g10520,LOC_Os02g17090,LOC_Os02g27360,LOC_Os02g32520,LOC_Os02g50730,LOC_Os02g53860,LOC_Os03g02750,LOC_Os03g27120,LOC_Os03g50960,LOC_Os03g54130,LOC_Os04g03796,LOC_Os04g12660,LOC_Os04g13090,LOC_Os04g47160,LOC_Os04g57490,LOC_Os05g43830,LOC_Os06g12370,LOC_Os06g20140,LOC_Os06g21380,LOC_Os07g07860,LOC_Os08g10670,LOC_Os08g41610,LOC_Os08g41730,LOC_Os09g38920,LOC_Os12g…	1186	398	32072	1.83452	1	0.238765	0.0366573	4
GOTERM_MF	GO:0004675	transmembrane receptor protein serine/threonine kinase activity	6	0.505902	0.00589439	LOC_Os03g56160,LOC_Os04g44900,LOC_Os04g44910,LOC_Os07g03900,LOC_Os07g38800,LOC_Os07g38810	1186	28	32072	5.79475	1	0.245974	0.0377641	4
GOTERM_BP	GO:0007178	transmembrane receptor protein serine/threonine kinase signaling pathway	6	0.505902	0.00589439	LOC_Os03g56160,LOC_Os04g44900,LOC_Os04g44910,LOC_Os07g03900,LOC_Os07g38800,LOC_Os07g38810	1186	28	32072	5.79475	1	0.245974	0.0377641	4
GOTERM_BP	GO:0006139	nucleobase-containing compound metabolic process	163	13.7437	0.00696257	LOC_Os01g02880,LOC_Os01g07870,LOC_Os01g08190,LOC_Os01g08260,LOC_Os01g09450,LOC_Os01g10580,LOC_Os01g12440,LOC_Os01g14580,LOC_Os01g17000,LOC_Os01g21120,LOC_Os01g21420,LOC_Os01g25386,LOC_Os01g32770,LOC_Os01g34970,LOC_Os01g36460,LOC_Os01g38610,LOC_Os01g43480,LOC_Os01g48130,LOC_Os01g48446,LOC_Os01g49830,LOC_Os01g50940,LOC_Os01g52560,LOC_Os01g61400,LOC_Os01g62920,LOC_Os01g63980,LOC_Os01g64360,LOC_Os01g…	1186	3614	32072	1.21967	1	0.281023	0.0431451	4
GOTERM_MF	GO:0004565	beta-galactosidase activity	5	0.421585	0.00826516	LOC_Os01g65460,LOC_Os03g06940,LOC_Os03g15020,LOC_Os03g49610,LOC_Os05g35360	1186	19	32072	7.11636	1	0.313069	0.0480651	4
GOTERM_BP	GO:0015996	chlorophyll catabolic process	6	0.505902	0.00857749	LOC_Os03g05310,LOC_Os05g47560,LOC_Os06g21380,LOC_Os06g24730,LOC_Os06g45480,LOC_Os09g36200	1186	31	32072	5.23397	1	0.318142	0.048844	4
Region g2
Type	Term	Description	Count	%	PValue	Genes	ListTotal	PopHits	PopTotal	FoldChange	Bonferroni	Benjamini	FDR	region
GOTERM_BP	GO:0019748	secondary metabolic process	96	3.19574	1.95e-09	LOC_Os01g08110,LOC_Os01g25010,LOC_Os01g27210,LOC_Os01g27360,LOC_Os01g37750,LOC_Os01g42350,LOC_Os01g42380,LOC_Os01g54620,LOC_Os01g61160,LOC_Os01g70770,LOC_Os02g26810,LOC_Os02g39160,LOC_Os02g46260,LOC_Os02g51440,LOC_Os02g56720,LOC_Os03g03034,LOC_Os03g04250,LOC_Os03g12270,LOC_Os03g16610,LOC_Os03g32470,LOC_Os04g08824,LOC_Os04g08828,LOC_Os04g09430,LOC_Os04g28520,LOC_Os04g43360,LOC_Os04g49194,LOC_Os04g…	3004	497	32072	2.06225	1.52e-06	7.86e-07	1.09e-07	5
GOTERM_CC	GO:0009535	chloroplast thylakoid membrane	64	2.13049	2.39e-08	LOC_Os01g05080,LOC_Os01g17170,LOC_Os01g17240,LOC_Os01g40310,LOC_Os01g48900,LOC_Os01g58049,LOC_Os01g64960,LOC_Os01g65902,LOC_Os02g01340,LOC_Os02g10390,LOC_Os02g12680,LOC_Os02g12690,LOC_Os02g33020,LOC_Os02g35090,LOC_Os02g39730,LOC_Os02g47020,LOC_Os02g49680,LOC_Os02g51080,LOC_Os02g57030,LOC_Os03g03720,LOC_Os03g39610,LOC_Os03g55970,LOC_Os03g56670,LOC_Os03g64020,LOC_Os04g16770,LOC_Os04g38410,LOC_Os04g…	3004	292	32072	2.34004	1.86e-05	7.77e-06	1.07e-06	5
GOTERM_CC	GO:0009579	thylakoid	105	3.49534	2.48e-08	LOC_Os01g01280,LOC_Os01g05080,LOC_Os01g17170,LOC_Os01g17240,LOC_Os01g40310,LOC_Os01g48900,LOC_Os01g57962,LOC_Os01g58049,LOC_Os01g62610,LOC_Os01g64960,LOC_Os01g65902,LOC_Os01g69200,LOC_Os02g01340,LOC_Os02g10120,LOC_Os02g10390,LOC_Os02g12680,LOC_Os02g12690,LOC_Os02g24574,LOC_Os02g33020,LOC_Os02g35090,LOC_Os02g39730,LOC_Os02g42740,LOC_Os02g47020,LOC_Os02g49680,LOC_Os02g51080,LOC_Os02g51710,LOC_Os02g…	3004	597	32072	1.87776	1.93e-05	7.77e-06	1.07e-06	5
GOTERM_MF	GO:0016740	transferase activity	307	10.2197	9.34e-08	LOC_Os01g01780,LOC_Os01g02020,LOC_Os01g02900,LOC_Os01g02940,LOC_Os01g08110,LOC_Os01g08380,LOC_Os01g12160,LOC_Os01g12420,LOC_Os01g12430,LOC_Os01g12560,LOC_Os01g12570,LOC_Os01g14630,LOC_Os01g18860,LOC_Os01g24790,LOC_Os01g26000,LOC_Os01g27210,LOC_Os01g27360,LOC_Os01g28474,LOC_Os01g33110,LOC_Os01g35170,LOC_Os01g37750,LOC_Os01g43270,LOC_Os01g43280,LOC_Os01g45140,LOC_Os01g45620,LOC_Os01g49240,LOC_Os01g…	3004	2380	32072	1.37717	7.29e-05	2.4e-05	3.31e-06	5
GOTERM_CC	GO:0009534	chloroplast thylakoid	33	1.09854	3.19e-07	LOC_Os01g05080,LOC_Os01g18320,LOC_Os01g40310,LOC_Os01g45750,LOC_Os01g67120,LOC_Os02g10390,LOC_Os02g39730,LOC_Os02g49680,LOC_Os02g51080,LOC_Os03g19760,LOC_Os03g56670,LOC_Os03g63950,LOC_Os04g38410,LOC_Os04g43420,LOC_Os04g51792,LOC_Os04g53230,LOC_Os04g54640,LOC_Os05g22614,LOC_Os05g49380,LOC_Os07g07540,LOC_Os07g37030,LOC_Os07g37550,LOC_Os08g06530,LOC_Os08g27010,LOC_Os08g32930,LOC_Os08g33820,LOC_Os08g…	3004	110	32072	3.20293	0.000249091	5.82e-05	8.04e-06	5
GOTERM_MF	GO:0043565	sequence-specific DNA binding	80	2.66312	1.7e-06	LOC_Os01g09080,LOC_Os01g10504,LOC_Os01g36220,LOC_Os01g39020,LOC_Os01g43550,LOC_Os01g53040,LOC_Os01g55150,LOC_Os01g58760,LOC_Os01g64020,LOC_Os01g64730,LOC_Os01g66030,LOC_Os01g66290,LOC_Os01g74140,LOC_Os02g10140,LOC_Os02g13310,LOC_Os02g14910,LOC_Os02g16540,LOC_Os02g43330,LOC_Os02g47060,LOC_Os02g49560,LOC_Os02g49840,LOC_Os02g53100,LOC_Os03g03100,LOC_Os03g06630,LOC_Os03g07450,LOC_Os03g10210,LOC_Os03g…	3004	459	32072	1.86082	0.00132933	0.000267237	3.69e-05	5
GOTERM_BP	GO:0015979	photosynthesis	56	1.86418	8.6e-06	LOC_Os01g05080,LOC_Os01g17170,LOC_Os01g52170,LOC_Os01g57962,LOC_Os01g58049,LOC_Os01g65902,LOC_Os02g01150,LOC_Os02g01340,LOC_Os02g10390,LOC_Os02g24574,LOC_Os02g49680,LOC_Os02g51080,LOC_Os03g03720,LOC_Os03g16050,LOC_Os03g20700,LOC_Os03g39610,LOC_Os03g56670,LOC_Os03g64020,LOC_Os04g16770,LOC_Os04g16872,LOC_Os04g16874,LOC_Os04g33830,LOC_Os04g38410,LOC_Os04g38600,LOC_Os04g58200,LOC_Os05g05480,LOC_Os05g…	3004	295	32072	2.02671	0.0067077	0.00110329	0.000152448	5
GOTERM_BP	GO:0009875	pollen-pistil interaction	28	0.932091	3.03e-05	LOC_Os01g12410,LOC_Os01g12420,LOC_Os01g12430,LOC_Os01g47810,LOC_Os01g57510,LOC_Os01g65010,LOC_Os01g65030,LOC_Os02g02210,LOC_Os02g32620,LOC_Os04g12080,LOC_Os04g34250,LOC_Os04g34270,LOC_Os04g34290,LOC_Os04g34320,LOC_Os04g34390,LOC_Os04g42740,LOC_Os04g52440,LOC_Os04g54020,LOC_Os04g54070,LOC_Os04g54110,LOC_Os04g54140,LOC_Os05g42210,LOC_Os07g36544,LOC_Os09g37880,LOC_Os11g05240,LOC_Os11g10290,LOC_Os12g…	3004	109	32072	2.74257	0.0236633	0.00372293	0.00051442	5
GOTERM_MF	GO:0008422	beta-glucosidase activity	13	0.432756	6.6e-05	LOC_Os01g70520,LOC_Os03g11420,LOC_Os03g49600,LOC_Os04g39864,LOC_Os04g39880,LOC_Os05g30250,LOC_Os07g46280,LOC_Os08g39860,LOC_Os08g39870,LOC_Os09g31410,LOC_Os09g31430,LOC_Os10g17650,LOC_Os12g23170	3004	27	32072	5.1405	0.0514661	0.00775974	0.00107221	5
GOTERM_BP	GO:0009637	response to blue light	18	0.599201	9.57e-05	LOC_Os02g01150,LOC_Os02g39160,LOC_Os02g49680,LOC_Os03g03720,LOC_Os03g16050,LOC_Os03g39610,LOC_Os04g36062,LOC_Os04g56400,LOC_Os05g22614,LOC_Os06g44970,LOC_Os07g37240,LOC_Os08g06530,LOC_Os08g40160,LOC_Os08g44000,LOC_Os08g45030,LOC_Os08g45190,LOC_Os09g32440,LOC_Os11g13890	3004	55	32072	3.4941	0.074652	0.0110259	0.00152351	5
GOTERM_BP	GO:0009416	response to light stimulus	27	0.898802	0.00011923	LOC_Os01g12160,LOC_Os02g02840,LOC_Os02g39160,LOC_Os02g49680,LOC_Os02g56860,LOC_Os03g03720,LOC_Os03g08360,LOC_Os03g10880,LOC_Os03g12030,LOC_Os03g14170,LOC_Os03g26530,LOC_Os03g31750,LOC_Os04g38600,LOC_Os04g49570,LOC_Os05g05180,LOC_Os06g06050,LOC_Os07g36230,LOC_Os08g01380,LOC_Os08g06630,LOC_Os08g29170,LOC_Os08g34150,LOC_Os09g09370,LOC_Os10g35840,LOC_Os11g32520,LOC_Os11g47970,LOC_Os12g03150,LOC_Os12g…	3004	113	32072	2.55101	0.0929997	0.0134611	0.00185999	5
GOTERM_MF	GO:0004568	chitinase activity	15	0.499334	0.000133886	LOC_Os01g64110,LOC_Os04g41620,LOC_Os04g41680,LOC_Os06g51050,LOC_Os06g51060,LOC_Os08g40690,LOC_Os09g32080,LOC_Os10g28080,LOC_Os10g39680,LOC_Os10g39700,LOC_Os11g37940,LOC_Os11g37970,LOC_Os11g47530,LOC_Os11g47550,LOC_Os11g47590	3004	40	32072	4.00366	0.104431	0.0148193	0.00204767	5
GOTERM_CC	GO:0010287	plastoglobule	18	0.599201	0.000194137	LOC_Os01g26000,LOC_Os01g57962,LOC_Os02g10390,LOC_Os02g12680,LOC_Os02g12690,LOC_Os02g33020,LOC_Os03g39610,LOC_Os03g56670,LOC_Os04g38410,LOC_Os04g54790,LOC_Os07g25430,LOC_Os07g37240,LOC_Os08g31750,LOC_Os08g33820,LOC_Os08g44680,LOC_Os11g13890,LOC_Os11g47970,LOC_Os12g23200	3004	59	32072	3.25722	0.151427	0.0201664	0.00278651	5
GOTERM_BP	GO:0006091	generation of precursor metabolites and energy	55	1.83089	0.000200656	LOC_Os01g02050,LOC_Os01g11700,LOC_Os01g22640,LOC_Os01g22660,LOC_Os01g46120,LOC_Os01g55350,LOC_Os01g57962,LOC_Os01g58049,LOC_Os01g63220,LOC_Os01g65902,LOC_Os02g01340,LOC_Os02g10390,LOC_Os03g03720,LOC_Os03g16050,LOC_Os03g38950,LOC_Os03g39610,LOC_Os03g64020,LOC_Os04g16770,LOC_Os04g16872,LOC_Os04g16874,LOC_Os04g33830,LOC_Os04g38600,LOC_Os05g05480,LOC_Os05g06720,LOC_Os05g32710,LOC_Os05g41640,LOC_Os05g…	3004	329	32072	1.78481	0.156512	0.0202268	0.00279485	5
GOTERM_BP	GO:0031408	oxylipin biosynthetic process	14	0.466045	0.000223392	LOC_Os01g27240,LOC_Os02g10120,LOC_Os02g12680,LOC_Os02g12690,LOC_Os02g39160,LOC_Os02g49680,LOC_Os03g03720,LOC_Os03g49380,LOC_Os03g52860,LOC_Os04g43200,LOC_Os05g23880,LOC_Os06g11210,LOC_Os08g29170,LOC_Os11g36719	3004	37	32072	4.03973	0.174246	0.0216868	0.00299659	5
GOTERM_CC	GO:0005773	vacuole	176	5.85885	0.000230507	LOC_Os01g07250,LOC_Os01g10950,LOC_Os01g10960,LOC_Os01g11700,LOC_Os01g11710,LOC_Os01g12160,LOC_Os01g13130,LOC_Os01g16030,LOC_Os01g19820,LOC_Os01g24550,LOC_Os01g27120,LOC_Os01g37910,LOC_Os01g40580,LOC_Os01g42350,LOC_Os01g42380,LOC_Os01g47410,LOC_Os01g48900,LOC_Os01g49430,LOC_Os01g53900,LOC_Os01g53930,LOC_Os01g57510,LOC_Os01g57854,LOC_Os01g59530,LOC_Os01g67190,LOC_Os01g71380,LOC_Os01g71860,LOC_Os01g…	3004	1403	32072	1.33931	0.179795	0.0216868	0.00299659	5
GOTERM_BP	GO:0009624	response to nematode	24	0.798935	0.000412316	LOC_Os01g17214,LOC_Os01g61940,LOC_Os01g65100,LOC_Os01g65110,LOC_Os02g13560,LOC_Os02g21009,LOC_Os03g04570,LOC_Os03g11010,LOC_Os03g17350,LOC_Os03g17370,LOC_Os03g39710,LOC_Os03g60260,LOC_Os04g13210,LOC_Os04g49890,LOC_Os04g51330,LOC_Os04g51610,LOC_Os05g27010,LOC_Os06g29844,LOC_Os06g38294,LOC_Os10g11860,LOC_Os10g20470,LOC_Os11g04020,LOC_Os11g04104,LOC_Os11g05690	3004	103	32072	2.48771	0.321607	0.0375406	0.00518721	5
GOTERM_BP	GO:0015995	chlorophyll biosynthetic process	20	0.665779	0.000449708	LOC_Os01g05080,LOC_Os01g17170,LOC_Os01g18320,LOC_Os01g52170,LOC_Os02g39160,LOC_Os02g51080,LOC_Os03g03720,LOC_Os03g16050,LOC_Os03g20700,LOC_Os04g58200,LOC_Os05g22614,LOC_Os05g33840,LOC_Os08g29170,LOC_Os08g40160,LOC_Os10g35370,LOC_Os10g35644,LOC_Os10g35840,LOC_Os10g39930,LOC_Os10g41780,LOC_Os11g16550	3004	77	32072	2.7731	0.350772	0.0402951	0.00556781	5
GOTERM_BP	GO:0010114	response to red light	16	0.532623	0.000529992	LOC_Os02g01150,LOC_Os02g39160,LOC_Os02g47744,LOC_Os02g49680,LOC_Os02g58350,LOC_Os03g03720,LOC_Os03g16050,LOC_Os03g39610,LOC_Os04g56400,LOC_Os05g22614,LOC_Os07g37240,LOC_Os08g06530,LOC_Os08g40160,LOC_Os08g44000,LOC_Os08g45190,LOC_Os11g13890	3004	53	32072	3.22307	0.413393	0.0460276	0.0063599	5
GOTERM_MF	GO:0016747	transferase activity, transferring acyl groups other than amino-acyl groups	34	1.13182	0.000589961	LOC_Os01g02020,LOC_Os01g08380,LOC_Os01g24790,LOC_Os01g26000,LOC_Os01g28474,LOC_Os01g63480,LOC_Os02g49920,LOC_Os02g56860,LOC_Os03g08360,LOC_Os03g12030,LOC_Os03g14170,LOC_Os03g26530,LOC_Os03g45740,LOC_Os04g09260,LOC_Os04g51660,LOC_Os06g01350,LOC_Os06g05320,LOC_Os06g05750,LOC_Os06g05790,LOC_Os06g08640,LOC_Os06g48560,LOC_Os07g04970,LOC_Os07g23150,LOC_Os07g31770,LOC_Os07g34260,LOC_Os07g36560,LOC_Os07g…	3004	179	32072	2.02793	0.460169	0.0504593	0.00697226	5
GOTERM_BP	GO:0048544	recognition of pollen	22	0.732357	0.000635318	LOC_Os01g12420,LOC_Os01g12430,LOC_Os01g57510,LOC_Os01g65030,LOC_Os02g32620,LOC_Os04g34250,LOC_Os04g34270,LOC_Os04g34290,LOC_Os04g34320,LOC_Os04g34390,LOC_Os04g42740,LOC_Os04g54002,LOC_Os04g54070,LOC_Os04g54110,LOC_Os04g54140,LOC_Os05g42210,LOC_Os07g36544,LOC_Os09g37790,LOC_Os09g37880,LOC_Os11g05240,LOC_Os11g10290,LOC_Os12g15550	3004	93	32072	2.52561	0.495548	0.0527405	0.00728747	5
GOTERM_BP	GO:0016998	cell wall macromolecule catabolic process	15	0.499334	0.000742794	LOC_Os01g53840,LOC_Os03g02685,LOC_Os04g41620,LOC_Os04g41680,LOC_Os06g41980,LOC_Os06g51050,LOC_Os06g51060,LOC_Os09g21210,LOC_Os09g32080,LOC_Os10g38040,LOC_Os10g39680,LOC_Os10g39700,LOC_Os11g35330,LOC_Os11g37940,LOC_Os11g37970	3004	49	32072	3.2683	0.579379	0.0599008	0.00827685	5
GOTERM_BP	GO:0010218	response to far red light	15	0.499334	0.000876856	LOC_Os02g01150,LOC_Os02g39160,LOC_Os02g49680,LOC_Os03g03720,LOC_Os03g16050,LOC_Os03g39610,LOC_Os04g56400,LOC_Os05g22614,LOC_Os06g51310,LOC_Os07g37240,LOC_Os08g06530,LOC_Os08g40160,LOC_Os08g44000,LOC_Os08g45190,LOC_Os11g13890	3004	50	32072	3.20293	0.683948	0.0687477	0.00949928	5
GOTERM_BP	GO:0051501	diterpene phytoalexin metabolic process	7	0.233023	0.000994251	LOC_Os01g14630,LOC_Os02g36140,LOC_Os02g36220,LOC_Os02g36264,LOC_Os04g10060,LOC_Os11g28530,LOC_Os12g30824	3004	9	32072	8.30389	0.775516	0.0768839	0.0106235	5
GOTERM_BP	GO:0009765	photosynthesis, light harvesting	9	0.299601	0.0010944	LOC_Os01g64960,LOC_Os02g10390,LOC_Os03g39610,LOC_Os04g38410,LOC_Os07g37240,LOC_Os07g37550,LOC_Os07g38960,LOC_Os08g33820,LOC_Os11g13890	3004	18	32072	5.33822	0.853632	0.0812877	0.011232	5
GOTERM_BP	GO:0070838	divalent metal ion transport	10	0.332889	0.00111087	LOC_Os01g01340,LOC_Os01g40310,LOC_Os03g16050,LOC_Os04g33830,LOC_Os04g51792,LOC_Os05g01950,LOC_Os08g33820,LOC_Os08g39300,LOC_Os10g32700,LOC_Os12g23200	3004	23	32072	4.64193	0.866476	0.0814392	0.0112529	5
GOTERM_BP	GO:0009409	response to cold	43	1.43142	0.00134198	LOC_Os01g05080,LOC_Os01g18860,LOC_Os01g53900,LOC_Os01g64110,LOC_Os01g71380,LOC_Os02g03060,LOC_Os02g25060,LOC_Os02g39160,LOC_Os02g47020,LOC_Os02g56860,LOC_Os03g03720,LOC_Os03g08360,LOC_Os03g12030,LOC_Os03g14170,LOC_Os03g16050,LOC_Os03g16170,LOC_Os03g18960,LOC_Os03g20120,LOC_Os03g25460,LOC_Os03g26530,LOC_Os04g27980,LOC_Os04g38600,LOC_Os04g43200,LOC_Os04g56400,LOC_Os05g07810,LOC_Os05g32320,LOC_Os05g…	3004	261	32072	1.75895	1	0.0971215	0.0134198	5
GOTERM_BP	GO:0043085	positive regulation of catalytic activity	16	0.532623	0.00154253	LOC_Os01g05080,LOC_Os01g45750,LOC_Os01g48300,LOC_Os01g52170,LOC_Os01g67120,LOC_Os02g49680,LOC_Os03g16050,LOC_Os03g55970,LOC_Os04g36062,LOC_Os04g57930,LOC_Os05g01950,LOC_Os05g32710,LOC_Os06g09880,LOC_Os07g46790,LOC_Os09g36040,LOC_Os11g16550	3004	60	32072	2.84705	1	0.110222	0.01523	5
GOTERM_BP	GO:0030003	cellular cation homeostasis	10	0.332889	0.00177688	LOC_Os01g01340,LOC_Os01g40310,LOC_Os03g16050,LOC_Os04g33830,LOC_Os04g51792,LOC_Os05g01950,LOC_Os08g33820,LOC_Os08g39300,LOC_Os10g32700,LOC_Os12g23200	3004	25	32072	4.27057	1	0.123832	0.0171107	5
GOTERM_BP	GO:0000023	maltose metabolic process	18	0.599201	0.00193135	LOC_Os01g45750,LOC_Os01g48300,LOC_Os01g52170,LOC_Os01g67120,LOC_Os02g49680,LOC_Os03g16050,LOC_Os03g19760,LOC_Os03g55970,LOC_Os04g36062,LOC_Os04g51330,LOC_Os05g32710,LOC_Os06g09880,LOC_Os06g28194,LOC_Os07g46790,LOC_Os08g27010,LOC_Os08g40160,LOC_Os09g36040,LOC_Os10g28600	3004	75	32072	2.56234	1	0.131355	0.01815	5
GOTERM_BP	GO:0008610	lipid biosynthetic process	18	0.599201	0.00193135	LOC_Os01g50030,LOC_Os02g10120,LOC_Os02g12680,LOC_Os02g12690,LOC_Os02g49920,LOC_Os02g56860,LOC_Os03g08360,LOC_Os03g12030,LOC_Os03g14170,LOC_Os03g26530,LOC_Os03g31750,LOC_Os03g49380,LOC_Os03g52860,LOC_Os05g23880,LOC_Os06g37610,LOC_Os11g03540,LOC_Os11g36719,LOC_Os12g16650	3004	75	32072	2.56234	1	0.131355	0.01815	5
GOTERM_BP	GO:0006865	amino acid transport	16	0.532623	0.0020298	LOC_Os01g63770,LOC_Os01g71700,LOC_Os01g71710,LOC_Os01g71720,LOC_Os01g71760,LOC_Os02g09810,LOC_Os02g44980,LOC_Os02g49060,LOC_Os02g49510,LOC_Os02g54730,LOC_Os03g25920,LOC_Os04g38860,LOC_Os11g05690,LOC_Os11g09020,LOC_Os11g19240,LOC_Os12g14100	3004	62	32072	2.75521	1	0.136407	0.0188482	5
GOTERM_MF	GO:0008289	lipid binding	45	1.498	0.00213566	LOC_Os01g11940,LOC_Os01g59870,LOC_Os01g60740,LOC_Os01g64960,LOC_Os03g02050,LOC_Os03g02740,LOC_Os03g14700,LOC_Os03g57980,LOC_Os03g58940,LOC_Os04g33570,LOC_Os05g06780,LOC_Os05g07710,LOC_Os05g39250,LOC_Os06g02490,LOC_Os06g30370,LOC_Os06g35940,LOC_Os06g43600,LOC_Os06g45050,LOC_Os06g49770,LOC_Os07g07870,LOC_Os07g07930,LOC_Os07g18750,LOC_Os07g19000,LOC_Os08g01710,LOC_Os08g32970,LOC_Os08g34150,LOC_Os08g…	3004	285	32072	1.68575	1	0.141832	0.0195978	5
GOTERM_MF	GO:0004872	receptor activity	77	2.56325	0.00225577	LOC_Os01g02310,LOC_Os01g02370,LOC_Os01g02560,LOC_Os01g10900,LOC_Os01g12420,LOC_Os01g12430,LOC_Os01g21960,LOC_Os01g23970,LOC_Os01g41910,LOC_Os01g43440,LOC_Os01g53840,LOC_Os01g57510,LOC_Os01g59570,LOC_Os01g65650,LOC_Os02g02040,LOC_Os02g07810,LOC_Os02g32620,LOC_Os02g40190,LOC_Os02g42620,LOC_Os02g42780,LOC_Os02g49680,LOC_Os02g57560,LOC_Os03g32580,LOC_Os03g51440,LOC_Os04g30790,LOC_Os04g30800,LOC_Os04g…	3004	563	32072	1.46019	1	0.148067	0.0204593	5
GOTERM_MF	GO:0022891	substrate-specific transmembrane transporter activity	16	0.532623	0.00231772	LOC_Os02g13560,LOC_Os02g36414,LOC_Os02g36440,LOC_Os03g03680,LOC_Os03g10090,LOC_Os03g11900,LOC_Os03g39710,LOC_Os04g37970,LOC_Os04g38220,LOC_Os07g10590,LOC_Os07g39360,LOC_Os10g21590,LOC_Os10g40950,LOC_Os10g41190,LOC_Os11g42430,LOC_Os12g32760	3004	63	32072	2.71147	1	0.150385	0.0207795	5
GOTERM_CC	GO:0009522	photosystem I	9	0.299601	0.00238521	LOC_Os01g57962,LOC_Os01g58049,LOC_Os03g39610,LOC_Os03g56670,LOC_Os04g33830,LOC_Os07g25430,LOC_Os08g44680,LOC_Os12g08770,LOC_Os12g23200	3004	21	32072	4.57561	1	0.152552	0.021079	5
GOTERM_BP	GO:0008643	carbohydrate transport	17	0.565912	0.00240516	LOC_Os01g12130,LOC_Os01g17240,LOC_Os01g65880,LOC_Os02g13560,LOC_Os02g19820,LOC_Os02g36700,LOC_Os02g43620,LOC_Os03g03680,LOC_Os03g22200,LOC_Os03g39710,LOC_Os05g51090,LOC_Os10g21590,LOC_Os10g26470,LOC_Os10g40950,LOC_Os10g41190,LOC_Os12g29220,LOC_Os12g32760	3004	70	32072	2.59285	1	0.152552	0.021079	5
GOTERM_CC	GO:0005887	integral component of plasma membrane	11	0.366178	0.00288097	LOC_Os01g12130,LOC_Os01g56420,LOC_Os01g65880,LOC_Os02g19820,LOC_Os02g36700,LOC_Os03g22200,LOC_Os05g35050,LOC_Os05g51090,LOC_Os06g18930,LOC_Os10g26470,LOC_Os12g29220	3004	33	32072	3.55881	1	0.176772	0.0244256	5
GOTERM_MF	GO:0005507	copper ion binding	44	1.46471	0.00308209	LOC_Os01g03530,LOC_Os01g16030,LOC_Os01g46380,LOC_Os01g53900,LOC_Os01g57880,LOC_Os01g61160,LOC_Os01g74300,LOC_Os01g74480,LOC_Os02g06480,LOC_Os02g41590,LOC_Os02g51440,LOC_Os03g16610,LOC_Os03g44630,LOC_Os03g50140,LOC_Os03g55120,LOC_Os04g46940,LOC_Os04g53710,LOC_Os05g01970,LOC_Os05g02520,LOC_Os05g34770,LOC_Os05g45820,LOC_Os06g11490,LOC_Os06g37080,LOC_Os06g46740,LOC_Os07g02200,LOC_Os07g20340,LOC_Os07g…	3004	283	32072	1.65994	1	0.187079	0.0258498	5
GOTERM_BP	GO:0009834	secondary cell wall biogenesis	8	0.266312	0.0031415	LOC_Os01g54620,LOC_Os01g70200,LOC_Os02g53380,LOC_Os03g30250,LOC_Os08g02300,LOC_Os09g25490,LOC_Os10g32980,LOC_Os11g48060	3004	17	32072	5.0242	1	0.188656	0.0260678	5
GOTERM_BP	GO:0019684	photosynthesis, light reaction	16	0.532623	0.00339091	LOC_Os01g71700,LOC_Os02g01150,LOC_Os02g39160,LOC_Os02g49680,LOC_Os02g51080,LOC_Os03g16050,LOC_Os03g18960,LOC_Os04g16770,LOC_Os04g33830,LOC_Os04g38410,LOC_Os04g51792,LOC_Os05g22614,LOC_Os07g37030,LOC_Os08g44000,LOC_Os12g08770,LOC_Os12g23200	3004	66	32072	2.58823	1	0.201491	0.0278412	5
GOTERM_BP	GO:0006098	pentose-phosphate shunt	24	0.798935	0.00377637	LOC_Os01g03040,LOC_Os01g05080,LOC_Os01g52170,LOC_Os01g67120,LOC_Os02g39160,LOC_Os02g49680,LOC_Os03g03720,LOC_Os03g16050,LOC_Os03g29950,LOC_Os04g33830,LOC_Os04g42800,LOC_Os04g54640,LOC_Os04g56400,LOC_Os05g22614,LOC_Os05g49070,LOC_Os05g49380,LOC_Os07g37030,LOC_Os08g06530,LOC_Os08g09270,LOC_Os08g40160,LOC_Os09g36040,LOC_Os10g28600,LOC_Os11g16550,LOC_Os12g08770	3004	125	32072	2.04987	1	0.219769	0.0303667	5
GOTERM_BP	GO:0019252	starch biosynthetic process	21	0.699068	0.00394465	LOC_Os01g45750,LOC_Os01g48300,LOC_Os01g52170,LOC_Os01g67120,LOC_Os02g39160,LOC_Os02g49680,LOC_Os03g16050,LOC_Os03g19760,LOC_Os03g31750,LOC_Os03g55970,LOC_Os04g36062,LOC_Os05g32710,LOC_Os06g09880,LOC_Os06g28194,LOC_Os07g13980,LOC_Os07g46790,LOC_Os08g25734,LOC_Os08g27010,LOC_Os08g40160,LOC_Os09g36040,LOC_Os10g28600	3004	103	32072	2.17675	1	0.226962	0.0313607	5
GOTERM_BP	GO:0006032	chitin catabolic process	11	0.366178	0.00409757	LOC_Os01g64110,LOC_Os04g41620,LOC_Os04g41680,LOC_Os06g51050,LOC_Os06g51060,LOC_Os09g32080,LOC_Os10g28080,LOC_Os10g39680,LOC_Os10g39700,LOC_Os11g37940,LOC_Os11g37970	3004	35	32072	3.35545	1	0.231307	0.0319611	5
GOTERM_BP	GO:0019344	cysteine biosynthetic process	17	0.565912	0.00432077	LOC_Os02g01150,LOC_Os02g10390,LOC_Os02g49680,LOC_Os02g51080,LOC_Os03g03720,LOC_Os03g56670,LOC_Os04g33830,LOC_Os04g38410,LOC_Os04g51792,LOC_Os04g53230,LOC_Os04g56400,LOC_Os06g06980,LOC_Os08g33820,LOC_Os08g34210,LOC_Os11g13890,LOC_Os11g16550,LOC_Os12g08770	3004	75	32072	2.41999	1	0.241492	0.0333683	5
GOTERM_BP	GO:0048443	stamen development	9	0.299601	0.0046414	LOC_Os01g10504,LOC_Os01g43440,LOC_Os01g66290,LOC_Os05g11414,LOC_Os06g44970,LOC_Os06g49840,LOC_Os08g45030,LOC_Os09g32948,LOC_Os12g10540	3004	24	32072	4.00366	1	0.256868	0.035493	5
GOTERM_MF	GO:0009899	ent-kaurene synthase activity	6	0.199734	0.00475072	LOC_Os02g36140,LOC_Os02g36220,LOC_Os02g36264,LOC_Os04g10060,LOC_Os11g28530,LOC_Os12g30824	3004	9	32072	7.11762	1	0.260366	0.0359763	5
GOTERM_MF	GO:0051119	sugar transmembrane transporter activity	8	0.266312	0.00513184	LOC_Os01g12130,LOC_Os01g56420,LOC_Os01g65880,LOC_Os02g19820,LOC_Os03g22200,LOC_Os05g35050,LOC_Os05g51090,LOC_Os12g29220	3004	19	32072	4.49534	1	0.278549	0.0384888	5
GOTERM_MF	GO:0015171	amino acid transmembrane transporter activity	10	0.332889	0.0058103	LOC_Os01g71700,LOC_Os01g71710,LOC_Os01g71720,LOC_Os01g71760,LOC_Os02g49060,LOC_Os02g54730,LOC_Os03g25920,LOC_Os04g38860,LOC_Os11g05690,LOC_Os11g19240	3004	31	32072	3.44401	1	0.309425	0.042755	5
GOTERM_BP	GO:0015706	nitrate transport	10	0.332889	0.0058103	LOC_Os01g17240,LOC_Os01g45900,LOC_Os01g53040,LOC_Os02g43620,LOC_Os02g53100,LOC_Os04g40410,LOC_Os08g02110,LOC_Os10g32700,LOC_Os10g36924,LOC_Os12g25200	3004	31	32072	3.44401	1	0.309425	0.042755	5
GOTERM_BP	GO:0006979	response to oxidative stress	40	1.33156	0.0059232	LOC_Os01g01660,LOC_Os01g09620,LOC_Os01g15810,LOC_Os01g22249,LOC_Os01g22352,LOC_Os01g57730,LOC_Os01g73200,LOC_Os02g14430,LOC_Os03g02939,LOC_Os03g13210,LOC_Os03g52390,LOC_Os03g55420,LOC_Os04g35520,LOC_Os04g59150,LOC_Os04g59160,LOC_Os04g59200,LOC_Os05g04380,LOC_Os05g04500,LOC_Os05g06970,LOC_Os05g42000,LOC_Os06g16350,LOC_Os06g27760,LOC_Os06g27850,LOC_Os06g33100,LOC_Os06g35480,LOC_Os06g46799,LOC_Os07g…	3004	261	32072	1.63623	1	0.309595	0.0427786	5
GOTERM_BP	GO:0030001	metal ion transport	22	0.732357	0.00642117	LOC_Os01g09660,LOC_Os01g20830,LOC_Os01g64890,LOC_Os01g70240,LOC_Os01g74490,LOC_Os03g06090,LOC_Os03g22490,LOC_Os03g26650,LOC_Os03g46454,LOC_Os03g46470,LOC_Os03g60480,LOC_Os04g32800,LOC_Os04g35160,LOC_Os04g46940,LOC_Os04g56570,LOC_Os05g45820,LOC_Os06g35060,LOC_Os07g12900,LOC_Os07g20340,LOC_Os07g26110,LOC_Os07g48390,LOC_Os08g31140	3004	116	32072	2.02484	1	0.329521	0.0455319	5
GOTERM_CC	GO:0005575	cellular_component	553	18.4088	0.0066906	LOC_Os01g01890,LOC_Os01g02020,LOC_Os01g02310,LOC_Os01g02860,LOC_Os01g06220,LOC_Os01g07780,LOC_Os01g08110,LOC_Os01g08130,LOC_Os01g08140,LOC_Os01g08380,LOC_Os01g09620,LOC_Os01g09700,LOC_Os01g09880,LOC_Os01g10210,LOC_Os01g10400,LOC_Os01g13300,LOC_Os01g15320,LOC_Os01g15448,LOC_Os01g19480,LOC_Os01g19880,LOC_Os01g20830,LOC_Os01g21960,LOC_Os01g24710,LOC_Os01g24790,LOC_Os01g25010,LOC_Os01g25360,LOC_Os01g…	3004	5319	32072	1.11	1	0.340255	0.047015	5
Region g3
Type	Term	Description	Count	%	PValue	Genes	ListTotal	PopHits	PopTotal	FoldChange	Bonferroni	Benjamini	FDR	region
GOTERM_BP	GO:0016036	cellular response to phosphate starvation	24	1.31291	2.79e-10	LOC_Os01g03549,LOC_Os01g03640,LOC_Os01g04920,LOC_Os01g56880,LOC_Os02g10780,LOC_Os02g55910,LOC_Os02g56510,LOC_Os03g05640,LOC_Os03g29250,LOC_Os03g44810,LOC_Os03g58570,LOC_Os04g10750,LOC_Os06g29790,LOC_Os06g40120,LOC_Os07g43670,LOC_Os08g15030,LOC_Os08g20420,LOC_Os09g25390,LOC_Os10g13700,LOC_Os10g25310,LOC_Os10g30770,LOC_Os10g30790,LOC_Os11g38050,LOC_Os12g44020	1828	67	32072	6.28473	1.52e-07	8.06e-08	1.17e-08	7
GOTERM_BP	GO:0009653	anatomical structure morphogenesis	95	5.19694	4.86e-08	LOC_Os01g03840,LOC_Os01g06280,LOC_Os01g11550,LOC_Os01g13270,LOC_Os01g50080,LOC_Os01g55100,LOC_Os01g55520,LOC_Os01g58194,LOC_Os01g59360,LOC_Os01g60770,LOC_Os01g60810,LOC_Os01g65590,LOC_Os01g68540,LOC_Os01g68890,LOC_Os02g03400,LOC_Os02g12890,LOC_Os02g16909,LOC_Os02g17240,LOC_Os02g35660,LOC_Os02g36890,LOC_Os02g40710,LOC_Os02g42160,LOC_Os02g42950,LOC_Os02g48730,LOC_Os03g01610,LOC_Os03g01640,LOC_Os03g…	1828	886	32072	1.88122	2.65e-05	7.31e-06	1.06e-06	7
GOTERM_BP	GO:0016049	cell growth	62	3.39168	1.21e-07	LOC_Os01g06280,LOC_Os01g13270,LOC_Os01g50080,LOC_Os01g58194,LOC_Os01g59360,LOC_Os01g60770,LOC_Os01g60810,LOC_Os01g68540,LOC_Os01g68890,LOC_Os02g17240,LOC_Os02g42160,LOC_Os02g48730,LOC_Os02g50040,LOC_Os02g57120,LOC_Os03g01610,LOC_Os03g01640,LOC_Os03g14090,LOC_Os03g24170,LOC_Os03g60720,LOC_Os03g62090,LOC_Os04g25150,LOC_Os04g25190,LOC_Os04g26190,LOC_Os04g26220,LOC_Os04g26230,LOC_Os04g37920,LOC_Os04g…	1828	494	32072	2.20199	6.6e-05	1.75e-05	2.54e-06	7
GOTERM_MF	GO:0030599	pectinesterase activity	22	1.2035	6.08e-07	LOC_Os01g14940,LOC_Os01g21034,LOC_Os01g50810,LOC_Os01g53990,LOC_Os01g65790,LOC_Os02g01310,LOC_Os03g01020,LOC_Os03g18860,LOC_Os03g19610,LOC_Os04g38560,LOC_Os04g46740,LOC_Os05g20570,LOC_Os05g46530,LOC_Os06g09340,LOC_Os07g47830,LOC_Os08g04650,LOC_Os08g34910,LOC_Os09g26360,LOC_Os11g11710,LOC_Os11g45220,LOC_Os11g45720,LOC_Os11g45730	1828	92	32072	4.19551	0.000331742	7.61e-05	1.11e-05	7
GOTERM_BP	GO:0009856	pollination	31	1.69584	7.28e-07	LOC_Os01g13270,LOC_Os01g58194,LOC_Os01g59360,LOC_Os01g68890,LOC_Os02g17240,LOC_Os02g49850,LOC_Os03g14090,LOC_Os03g24170,LOC_Os03g50160,LOC_Os03g63390,LOC_Os04g02690,LOC_Os04g49690,LOC_Os05g14750,LOC_Os05g20150,LOC_Os05g25370,LOC_Os05g25430,LOC_Os06g36880,LOC_Os07g41590,LOC_Os08g10510,LOC_Os08g25710,LOC_Os08g43500,LOC_Os10g34680,LOC_Os11g03230,LOC_Os11g03270,LOC_Os11g04170,LOC_Os11g04840,LOC_Os11g…	1828	176	32072	3.09029	0.000397519	8.82e-05	1.28e-05	7
GOTERM_BP	GO:0042545	cell wall modification	15	0.820569	1.1e-05	LOC_Os01g21034,LOC_Os01g53990,LOC_Os01g62260,LOC_Os01g65790,LOC_Os03g18860,LOC_Os03g19610,LOC_Os04g38560,LOC_Os04g46740,LOC_Os06g09340,LOC_Os06g48200,LOC_Os07g47830,LOC_Os08g34910,LOC_Os09g26360,LOC_Os11g45720,LOC_Os11g45730	1828	53	32072	4.96553	0.0059869	0.00105627	0.00015351	7
GOTERM_BP	GO:0006817	phosphate ion transport	10	0.547046	1.92e-05	LOC_Os02g56510,LOC_Os03g05640,LOC_Os03g44810,LOC_Os03g58570,LOC_Os04g10750,LOC_Os04g10800,LOC_Os06g21920,LOC_Os06g29790,LOC_Os10g30770,LOC_Os10g30790	1828	21	32072	8.35469	0.0104632	0.00175596	0.000255199	7
GOTERM_MF	GO:0004857	enzyme inhibitor activity	17	0.929978	2.3e-05	LOC_Os01g14940,LOC_Os01g21034,LOC_Os01g50810,LOC_Os01g65790,LOC_Os02g01310,LOC_Os03g01020,LOC_Os03g18860,LOC_Os04g38560,LOC_Os05g20570,LOC_Os05g46530,LOC_Os06g09340,LOC_Os07g47830,LOC_Os08g04650,LOC_Os08g34910,LOC_Os09g26360,LOC_Os11g11710,LOC_Os11g45220	1828	74	32072	4.03058	0.0125698	0.00205928	0.000299282	7
GOTERM_MF	GO:0045330	aspartyl esterase activity	13	0.71116	2.4e-05	LOC_Os01g21034,LOC_Os01g53990,LOC_Os01g65790,LOC_Os03g18860,LOC_Os03g19610,LOC_Os04g38560,LOC_Os04g46740,LOC_Os06g09340,LOC_Os07g47830,LOC_Os08g34910,LOC_Os09g26360,LOC_Os11g45720,LOC_Os11g45730	1828	42	32072	5.43055	0.0131047	0.00209697	0.000304759	7
GOTERM_BP	GO:0010264	myo-inositol hexakisphosphate biosynthetic process	11	0.601751	0.000113608	LOC_Os01g60830,LOC_Os03g17600,LOC_Os03g39000,LOC_Os04g37619,LOC_Os05g05600,LOC_Os05g35410,LOC_Os05g43650,LOC_Os05g50930,LOC_Os07g22930,LOC_Os09g12540,LOC_Os10g22450	1828	35	32072	5.5141	0.0620302	0.00948476	0.00137845	7
GOTERM_BP	GO:0009860	pollen tube growth	16	0.875274	0.000331338	LOC_Os01g05840,LOC_Os01g13270,LOC_Os01g48410,LOC_Os01g55520,LOC_Os02g17240,LOC_Os03g14090,LOC_Os04g02690,LOC_Os05g14750,LOC_Os05g20150,LOC_Os07g41590,LOC_Os08g43500,LOC_Os10g32590,LOC_Os10g34680,LOC_Os12g04700,LOC_Os12g06570,LOC_Os12g42660	1828	86	32072	3.26416	0.180911	0.0240132	0.00348991	7
GOTERM_MF	GO:0004185	serine-type carboxypeptidase activity	14	0.765864	0.000332372	LOC_Os01g11670,LOC_Os03g26930,LOC_Os03g27480,LOC_Os03g52040,LOC_Os04g09720,LOC_Os04g32540,LOC_Os05g14750,LOC_Os05g18604,LOC_Os06g43930,LOC_Os08g44640,LOC_Os10g01134,LOC_Os10g39150,LOC_Os11g24510,LOC_Os11g27329	1828	67	32072	3.66609	0.181475	0.0240132	0.00348991	7
GOTERM_MF	GO:0016762	xyloglucan:xyloglucosyl transferase activity	9	0.492341	0.000665018	LOC_Os02g03550,LOC_Os03g01800,LOC_Os03g13570,LOC_Os04g51450,LOC_Os04g53950,LOC_Os06g48200,LOC_Os07g29750,LOC_Os09g23220,LOC_Os10g02770	1828	29	32072	5.44496	0.3631	0.0462667	0.00672408	7
GOTERM_BP	GO:0006073	cellular glucan metabolic process	9	0.492341	0.000665018	LOC_Os02g03550,LOC_Os03g01800,LOC_Os03g13570,LOC_Os04g51450,LOC_Os04g53950,LOC_Os06g48200,LOC_Os07g29750,LOC_Os09g23220,LOC_Os10g02770	1828	29	32072	5.44496	0.3631	0.0462667	0.00672408	7
GOTERM_BP	GO:0009737	response to abscisic acid	31	1.69584	0.000678911	LOC_Os01g10890,LOC_Os02g32740,LOC_Os02g40710,LOC_Os02g45670,LOC_Os02g55400,LOC_Os03g05640,LOC_Os03g42810,LOC_Os03g43670,LOC_Os03g57950,LOC_Os04g10750,LOC_Os04g16450,LOC_Os04g37619,LOC_Os04g44060,LOC_Os05g04550,LOC_Os05g11790,LOC_Os05g35410,LOC_Os05g49170,LOC_Os06g04070,LOC_Os06g08310,LOC_Os07g09420,LOC_Os07g49270,LOC_Os09g21710,LOC_Os09g25600,LOC_Os10g30770,LOC_Os10g30790,LOC_Os10g33210,LOC_Os10g…	1828	265	32072	2.05242	0.370685	0.0463744	0.00673973	7
GOTERM_MF	GO:0016788	hydrolase activity, acting on ester bonds	23	1.25821	0.00122691	LOC_Os01g11660,LOC_Os01g12304,LOC_Os02g39155,LOC_Os02g40440,LOC_Os03g19670,LOC_Os03g25030,LOC_Os03g38350,LOC_Os03g47940,LOC_Os03g62740,LOC_Os03g64170,LOC_Os04g42860,LOC_Os04g55850,LOC_Os05g11910,LOC_Os05g34700,LOC_Os06g03900,LOC_Os06g05550,LOC_Os06g43044,LOC_Os07g39740,LOC_Os09g04710,LOC_Os11g02580,LOC_Os11g38050,LOC_Os11g48070,LOC_Os12g17570	1828	178	32072	2.26703	0.669895	0.0781251	0.0113542	7
GOTERM_BP	GO:0007154	cell communication	33	1.80525	0.00138032	LOC_Os01g03549,LOC_Os01g03640,LOC_Os01g04920,LOC_Os01g08020,LOC_Os01g21250,LOC_Os01g49320,LOC_Os01g52230,LOC_Os02g02400,LOC_Os02g10780,LOC_Os02g13290,LOC_Os02g55910,LOC_Os02g56510,LOC_Os03g03910,LOC_Os03g21960,LOC_Os03g29250,LOC_Os03g58570,LOC_Os04g02050,LOC_Os04g58390,LOC_Os05g15850,LOC_Os05g49170,LOC_Os06g29790,LOC_Os06g40120,LOC_Os07g19040,LOC_Os07g43670,LOC_Os07g48790,LOC_Os08g05580,LOC_Os08g…	1828	304	32072	1.90454	0.753655	0.0864286	0.0125609	7
GOTERM_BP	GO:0009991	response to extracellular stimulus	33	1.80525	0.00144822	LOC_Os01g03549,LOC_Os01g03640,LOC_Os01g04920,LOC_Os01g08020,LOC_Os01g21250,LOC_Os01g49320,LOC_Os01g52230,LOC_Os02g02400,LOC_Os02g10780,LOC_Os02g13290,LOC_Os02g55910,LOC_Os02g56510,LOC_Os03g03910,LOC_Os03g21960,LOC_Os03g29250,LOC_Os03g58570,LOC_Os04g02050,LOC_Os04g58390,LOC_Os05g15850,LOC_Os05g49170,LOC_Os06g29790,LOC_Os06g40120,LOC_Os07g19040,LOC_Os07g43670,LOC_Os07g48790,LOC_Os08g05580,LOC_Os08g…	1828	305	32072	1.8983	0.79073	0.0875435	0.012723	7
GOTERM_MF	GO:0052689	carboxylic ester hydrolase activity	10	0.547046	0.00146803	LOC_Os02g43340,LOC_Os03g19670,LOC_Os03g62740,LOC_Os05g34700,LOC_Os07g41590,LOC_Os09g39580,LOC_Os11g43760,LOC_Os11g48070,LOC_Os12g17570,LOC_Os12g36770	1828	42	32072	4.17735	0.801546	0.0875435	0.012723	7
GOTERM_BP	GO:0009753	response to jasmonic acid	13	0.71116	0.00197422	LOC_Os01g37590,LOC_Os02g41510,LOC_Os02g45670,LOC_Os03g16150,LOC_Os03g42810,LOC_Os05g02060,LOC_Os05g02530,LOC_Os06g04070,LOC_Os08g33660,LOC_Os09g21710,LOC_Os09g36730,LOC_Os10g33210,LOC_Os12g08810	1828	73	32072	3.12443	1	0.112377	0.0163322	7
GOTERM_MF	GO:0016829	lyase activity	24	1.31291	0.00252855	LOC_Os02g12300,LOC_Os02g17780,LOC_Os02g39790,LOC_Os03g13300,LOC_Os03g14450,LOC_Os03g22620,LOC_Os03g22634,LOC_Os03g58300,LOC_Os04g27430,LOC_Os04g27670,LOC_Os04g37460,LOC_Os06g04070,LOC_Os06g38510,LOC_Os06g40640,LOC_Os07g49250,LOC_Os08g02700,LOC_Os08g04500,LOC_Os08g07080,LOC_Os08g07100,LOC_Os08g31030,LOC_Os09g28910,LOC_Os10g08022,LOC_Os10g31910,LOC_Os12g33610	1828	202	32072	2.08454	1	0.139698	0.0203028	7
GOTERM_BP	GO:0016043	cellular component organization	111	6.07221	0.00269039	LOC_Os01g01302,LOC_Os01g06280,LOC_Os01g13270,LOC_Os01g52230,LOC_Os01g58194,LOC_Os01g59360,LOC_Os01g60770,LOC_Os01g60810,LOC_Os01g65590,LOC_Os01g68540,LOC_Os01g68890,LOC_Os01g71270,LOC_Os02g03400,LOC_Os02g04510,LOC_Os02g07900,LOC_Os02g13290,LOC_Os02g17240,LOC_Os02g32740,LOC_Os02g36890,LOC_Os02g40710,LOC_Os02g40770,LOC_Os02g42160,LOC_Os02g42820,LOC_Os02g48730,LOC_Os02g57120,LOC_Os03g01610,LOC_Os03g…	1828	1455	32072	1.33847	1	0.143313	0.0208282	7
GOTERM_MF	GO:0050660	flavin adenine dinucleotide binding	22	1.2035	0.00276067	LOC_Os01g12490,LOC_Os01g71310,LOC_Os02g53130,LOC_Os03g05900,LOC_Os03g36530,LOC_Os03g52910,LOC_Os04g36720,LOC_Os05g26660,LOC_Os05g31040,LOC_Os05g48200,LOC_Os06g35560,LOC_Os06g35590,LOC_Os08g04630,LOC_Os08g06170,LOC_Os08g31030,LOC_Os08g36480,LOC_Os09g19930,LOC_Os09g37620,LOC_Os09g39190,LOC_Os10g33520,LOC_Os10g34230,LOC_Os12g35610	1828	179	32072	2.15635	1	0.144049	0.0209351	7
GOTERM_BP	GO:0019725	cellular homeostasis	27	1.47702	0.00286749	LOC_Os01g05650,LOC_Os01g09830,LOC_Os01g14520,LOC_Os01g27140,LOC_Os01g28840,LOC_Os02g02400,LOC_Os02g51370,LOC_Os02g54640,LOC_Os03g03910,LOC_Os04g37920,LOC_Os05g02240,LOC_Os05g09500,LOC_Os05g10930,LOC_Os05g11320,LOC_Os05g11990,LOC_Os05g31730,LOC_Os05g35410,LOC_Os06g08900,LOC_Os06g46310,LOC_Os06g46670,LOC_Os07g01310,LOC_Os07g06600,LOC_Os07g48510,LOC_Os08g39370,LOC_Os08g44400,LOC_Os10g11140,LOC_Os12g…	1828	242	32072	1.95748	1	0.147047	0.0213708	7
GOTERM_BP	GO:0010143	cutin biosynthetic process	5	0.273523	0.00293555	LOC_Os01g63580,LOC_Os05g04170,LOC_Os06g40150,LOC_Os08g44840,LOC_Os11g35400	1828	8	32072	10.9655	1	0.147047	0.0213708	7
GOTERM_BP	GO:0070417	cellular response to cold	5	0.273523	0.00293555	LOC_Os02g10780,LOC_Os03g29250,LOC_Os05g49170,LOC_Os06g40120,LOC_Os10g25310	1828	8	32072	10.9655	1	0.147047	0.0213708	7
GOTERM_MF	GO:0016614	oxidoreductase activity, acting on CH-OH group of donors	11	0.601751	0.00375178	LOC_Os01g71280,LOC_Os01g71310,LOC_Os03g36530,LOC_Os05g31040,LOC_Os06g35560,LOC_Os06g35590,LOC_Os08g06170,LOC_Os08g31030,LOC_Os09g19930,LOC_Os10g33520,LOC_Os10g34230	1828	59	32072	3.27108	1	0.183052	0.0266035	7
GOTERM_BP	GO:0032940	secretion by cell	8	0.437637	0.00439599	LOC_Os01g41430,LOC_Os01g55940,LOC_Os01g71310,LOC_Os06g02019,LOC_Os09g36680,LOC_Os10g34230,LOC_Os10g35110,LOC_Os11g35500	1828	32	32072	4.38621	1	0.209054	0.0303824	7
GOTERM_MF	GO:0005089	Rho guanyl-nucleotide exchange factor activity	6	0.328228	0.00445599	LOC_Os01g48410,LOC_Os01g55520,LOC_Os01g62990,LOC_Os02g17240,LOC_Os02g47420,LOC_Os07g29780	1828	16	32072	6.57932	1	0.209258	0.0304121	7
GOTERM_BP	GO:0009250	glucan biosynthetic process	5	0.273523	0.00544445	LOC_Os02g51070,LOC_Os04g53310,LOC_Os06g04200,LOC_Os06g06560,LOC_Os07g22930	1828	10	32072	8.77243	1	0.249442	0.0362521	7
GOTERM_CC	GO:0009501	amyloplast	5	0.273523	0.00544445	LOC_Os02g51070,LOC_Os06g04200,LOC_Os06g06560,LOC_Os07g43390,LOC_Os09g12660	1828	10	32072	8.77243	1	0.249442	0.0362521	7
GOTERM_MF	GO:0015293	symporter activity	7	0.382932	0.0055938	LOC_Os03g05640,LOC_Os04g10750,LOC_Os04g10800,LOC_Os06g21920,LOC_Os10g30770,LOC_Os10g30790,LOC_Os11g06820	1828	25	32072	4.91256	1	0.253196	0.0367977	7
GOTERM_MF	GO:0003779	actin binding	12	0.656455	0.00588025	LOC_Os01g69240,LOC_Os03g64290,LOC_Os04g38810,LOC_Os04g51440,LOC_Os05g06110,LOC_Os05g32760,LOC_Os06g03220,LOC_Os07g30090,LOC_Os08g34780,LOC_Os10g17660,LOC_Os10g20710,LOC_Os12g43340	1828	74	32072	2.84511	1	0.262993	0.0382216	7
GOTERM_BP	GO:0006855	drug transmembrane transport	11	0.601751	0.00684251	LOC_Os02g11760,LOC_Os03g12790,LOC_Os03g37411,LOC_Os03g37470,LOC_Os03g42830,LOC_Os04g30490,LOC_Os04g48290,LOC_Os08g44870,LOC_Os09g37600,LOC_Os10g13830,LOC_Os12g36660	1828	65	32072	2.96913	1	0.297722	0.0432688	7
GOTERM_MF	GO:0009011	starch synthase activity	5	0.273523	0.00711098	LOC_Os02g51070,LOC_Os04g53310,LOC_Os06g04200,LOC_Os06g06560,LOC_Os07g22930	1828	11	32072	7.97494	1	0.297722	0.0432688	7
GOTERM_BP	GO:0080040	positive regulation of cellular response to phosphate starvation	4	0.218818	0.00713222	LOC_Os02g10780,LOC_Os03g29250,LOC_Os06g40120,LOC_Os10g25310	1828	5	32072	14.0359	1	0.297722	0.0432688	7
GOTERM_BP	GO:0030643	cellular phosphate ion homeostasis	4	0.218818	0.00713222	LOC_Os03g13540,LOC_Os10g02750,LOC_Os11g34710,LOC_Os11g34720	1828	5	32072	14.0359	1	0.297722	0.0432688	7
GOTERM_MF	GO:0003993	acid phosphatase activity	9	0.492341	0.00798148	LOC_Os01g09540,LOC_Os01g56880,LOC_Os03g13540,LOC_Os10g02750,LOC_Os11g05400,LOC_Os11g34710,LOC_Os11g34720,LOC_Os12g12860,LOC_Os12g44020	1828	46	32072	3.43269	1	0.329511	0.0478889	7
Region g4
Type	Term	Description	Count	%	PValue	Genes	ListTotal	PopHits	PopTotal	FoldChange	Bonferroni	Benjamini	FDR	region
GOTERM_BP	GO:0009058	biosynthetic process	244	20.5734	7.07e-08	LOC_Os01g06450,LOC_Os01g07376,LOC_Os01g08190,LOC_Os01g09450,LOC_Os01g10440,LOC_Os01g10580,LOC_Os01g12440,LOC_Os01g17000,LOC_Os01g21120,LOC_Os01g31760,LOC_Os01g32770,LOC_Os01g36460,LOC_Os01g38610,LOC_Os01g44050,LOC_Os01g47080,LOC_Os01g48130,LOC_Os01g48446,LOC_Os01g48910,LOC_Os01g49830,LOC_Os01g50050,LOC_Os01g50590,LOC_Os01g50940,LOC_Os01g56310,LOC_Os01g59920,LOC_Os01g60450,LOC_Os01g61230,LOC_Os01g…	1186	4709	32072	1.40121	2.67e-05	2.49e-05	3.82e-06	4
GOTERM_MF	GO:0003700	sequence-specific DNA binding transcription factor activity	116	9.78078	2.33e-07	LOC_Os01g09450,LOC_Os01g10580,LOC_Os01g12440,LOC_Os01g17000,LOC_Os01g21120,LOC_Os01g38610,LOC_Os01g48130,LOC_Os01g48446,LOC_Os01g49830,LOC_Os01g50940,LOC_Os01g62920,LOC_Os01g63980,LOC_Os01g64360,LOC_Os01g67650,LOC_Os02g01940,LOC_Os02g04340,LOC_Os02g05610,LOC_Os02g08440,LOC_Os02g12790,LOC_Os02g31890,LOC_Os02g42870,LOC_Os02g43820,LOC_Os02g44930,LOC_Os02g56140,LOC_Os02g57550,LOC_Os02g58670,LOC_Os03g…	1186	1877	32072	1.67123	8.82e-05	7.18e-05	1.1e-05	4
GOTERM_MF	GO:0030246	carbohydrate binding	30	2.52951	0.000142597	LOC_Os01g65460,LOC_Os01g66640,LOC_Os02g48080,LOC_Os03g02550,LOC_Os03g06940,LOC_Os03g10440,LOC_Os03g12150,LOC_Os03g15020,LOC_Os03g15250,LOC_Os03g48610,LOC_Os03g56160,LOC_Os04g23760,LOC_Os04g28780,LOC_Os04g34330,LOC_Os04g34420,LOC_Os04g44900,LOC_Os04g44910,LOC_Os04g53998,LOC_Os05g07420,LOC_Os05g35360,LOC_Os06g30130,LOC_Os07g03900,LOC_Os07g04820,LOC_Os07g38800,LOC_Os07g38810,LOC_Os08g03020,LOC_Os08g…	1186	356	32072	2.27883	0.0539017	0.0121064	0.00185868	4
GOTERM_BP	GO:0009607	response to biotic stimulus	63	5.31197	0.00101304	LOC_Os01g14580,LOC_Os01g25386,LOC_Os01g41750,LOC_Os01g51770,LOC_Os01g62290,LOC_Os01g64470,LOC_Os01g64480,LOC_Os01g65000,LOC_Os02g01280,LOC_Os02g03140,LOC_Os02g03150,LOC_Os02g03180,LOC_Os02g08440,LOC_Os02g53180,LOC_Os03g05310,LOC_Os03g05880,LOC_Os03g07350,LOC_Os03g08330,LOC_Os03g17700,LOC_Os03g39690,LOC_Os03g50960,LOC_Os03g54130,LOC_Os04g12660,LOC_Os04g13090,LOC_Os04g13220,LOC_Os04g14690,LOC_Os04g…	1186	1095	32072	1.55585	0.382931	0.0623548	0.00957327	4
GOTERM_CC	GO:0009507	chloroplast	88	7.4199	0.00433186	LOC_Os01g02080,LOC_Os01g44050,LOC_Os01g47080,LOC_Os01g48420,LOC_Os01g49710,LOC_Os01g51770,LOC_Os01g56310,LOC_Os01g59920,LOC_Os01g61400,LOC_Os01g62420,LOC_Os01g65830,LOC_Os01g67860,LOC_Os01g72280,LOC_Os01g74000,LOC_Os02g01280,LOC_Os02g05610,LOC_Os02g08490,LOC_Os02g32520,LOC_Os02g36850,LOC_Os02g41860,LOC_Os02g55420,LOC_Os02g57290,LOC_Os03g01770,LOC_Os03g05310,LOC_Os03g06710,LOC_Os03g07960,LOC_Os03g…	1186	1750	32072	1.35983	1	0.213307	0.0327488	4
GOTERM_BP	GO:0009611	response to wounding	13	1.09612	0.00722247	LOC_Os01g25386,LOC_Os01g60450,LOC_Os02g33110,LOC_Os03g02550,LOC_Os03g17700,LOC_Os04g33740,LOC_Os06g47620,LOC_Os07g42960,LOC_Os08g33710,LOC_Os08g34249,LOC_Os10g33170,LOC_Os11g32650,LOC_Os12g09089	1186	137	32072	2.56604	1	0.286811	0.0440338	4
GOTERM_BP	GO:0016117	carotenoid biosynthetic process	9	0.758853	0.00821593	LOC_Os02g57290,LOC_Os03g36750,LOC_Os04g56320,LOC_Os07g10490,LOC_Os08g17390,LOC_Os09g36130,LOC_Os11g36440,LOC_Os12g23180,LOC_Os12g43130	1186	73	32072	3.33396	1	0.313069	0.0480651	4
GOTERM_BP	GO:0009607	response to biotic stimulus	172	5.7257	1.45e-09	LOC_Os01g02060,LOC_Os01g02310,LOC_Os01g12160,LOC_Os01g12580,LOC_Os01g16860,LOC_Os01g17214,LOC_Os01g17240,LOC_Os01g24550,LOC_Os01g24820,LOC_Os01g28450,LOC_Os01g41770,LOC_Os01g41780,LOC_Os01g41910,LOC_Os01g41930,LOC_Os01g42350,LOC_Os01g42380,LOC_Os01g43550,LOC_Os01g45140,LOC_Os01g49430,LOC_Os01g54620,LOC_Os01g63770,LOC_Os01g64790,LOC_Os01g66510,LOC_Os01g71380,LOC_Os01g71860,LOC_Os02g01340,LOC_Os02g…	3004	1095	32072	1.67703	1.13e-06	6.29e-07	8.69e-08	5
GOTERM_BP	GO:0009058	biosynthetic process	553	18.4088	6.83e-08	LOC_Os01g02110,LOC_Os01g04750,LOC_Os01g04800,LOC_Os01g08110,LOC_Os01g09080,LOC_Os01g09280,LOC_Os01g09620,LOC_Os01g09700,LOC_Os01g09930,LOC_Os01g09990,LOC_Os01g10504,LOC_Os01g11700,LOC_Os01g11910,LOC_Os01g12560,LOC_Os01g12570,LOC_Os01g12860,LOC_Os01g13090,LOC_Os01g13300,LOC_Os01g13480,LOC_Os01g14110,LOC_Os01g14630,LOC_Os01g15900,LOC_Os01g16030,LOC_Os01g16810,LOC_Os01g16860,LOC_Os01g17170,LOC_Os01g…	3004	4709	32072	1.25378	5.33e-05	1.93e-05	2.66e-06	5
GOTERM_MF	GO:0003700	sequence-specific DNA binding transcription factor activity	227	7.55659	0.000196485	LOC_Os01g02110,LOC_Os01g04750,LOC_Os01g04800,LOC_Os01g09080,LOC_Os01g09280,LOC_Os01g09620,LOC_Os01g09930,LOC_Os01g09990,LOC_Os01g10504,LOC_Os01g11910,LOC_Os01g12860,LOC_Os01g14110,LOC_Os01g15900,LOC_Os01g16810,LOC_Os01g34060,LOC_Os01g36220,LOC_Os01g39020,LOC_Os01g39330,LOC_Os01g41900,LOC_Os01g43550,LOC_Os01g43950,LOC_Os01g47370,LOC_Os01g53040,LOC_Os01g55150,LOC_Os01g57650,LOC_Os01g58760,LOC_Os01g…	3004	1877	32072	1.29118	0.153258	0.0201664	0.00278651	5
GOTERM_CC	GO:0009507	chloroplast	213	7.09055	0.000229287	LOC_Os01g02060,LOC_Os01g03040,LOC_Os01g05080,LOC_Os01g07090,LOC_Os01g12160,LOC_Os01g17170,LOC_Os01g17240,LOC_Os01g18320,LOC_Os01g21990,LOC_Os01g26000,LOC_Os01g26970,LOC_Os01g31980,LOC_Os01g40310,LOC_Os01g40580,LOC_Os01g45750,LOC_Os01g46380,LOC_Os01g46720,LOC_Os01g52170,LOC_Os01g53020,LOC_Os01g53900,LOC_Os01g53930,LOC_Os01g57958,LOC_Os01g57962,LOC_Os01g58049,LOC_Os01g60280,LOC_Os01g62230,LOC_Os01g…	3004	1750	32072	1.29947	0.178844	0.0216868	0.00299659	5
GOTERM_BP	GO:0016117	carotenoid biosynthetic process	19	0.63249	0.000632379	LOC_Os01g05080,LOC_Os01g52170,LOC_Os01g67120,LOC_Os02g35090,LOC_Os02g38020,LOC_Os02g39160,LOC_Os03g16050,LOC_Os03g19760,LOC_Os03g55970,LOC_Os04g53230,LOC_Os05g22614,LOC_Os05g47850,LOC_Os07g07540,LOC_Os08g14450,LOC_Os08g29170,LOC_Os08g44000,LOC_Os09g38320,LOC_Os10g39930,LOC_Os11g16550	3004	73	32072	2.7788	0.493256	0.0527405	0.00728747	5
GOTERM_BP	GO:0009611	response to wounding	26	0.865513	0.00287285	LOC_Os01g12160,LOC_Os01g12580,LOC_Os01g31980,LOC_Os01g42860,LOC_Os01g64110,LOC_Os02g12680,LOC_Os02g12690,LOC_Os03g04570,LOC_Os03g52860,LOC_Os04g02910,LOC_Os04g13210,LOC_Os04g27980,LOC_Os04g40410,LOC_Os04g56930,LOC_Os05g48040,LOC_Os06g06980,LOC_Os06g29180,LOC_Os06g47700,LOC_Os06g47750,LOC_Os07g07540,LOC_Os09g08072,LOC_Os09g32440,LOC_Os11g19340,LOC_Os12g07640,LOC_Os12g36240,LOC_Os12g40890	3004	137	32072	2.02618	1	0.176772	0.0244256	5
GOTERM_MF	GO:0030246	carbohydrate binding	52	1.73103	0.0039804	LOC_Os01g12070,LOC_Os01g12410,LOC_Os01g12420,LOC_Os01g12430,LOC_Os01g47810,LOC_Os01g55820,LOC_Os01g65010,LOC_Os01g65030,LOC_Os02g04330,LOC_Os02g32620,LOC_Os02g42780,LOC_Os02g48200,LOC_Os02g56810,LOC_Os03g30250,LOC_Os03g61310,LOC_Os04g03579,LOC_Os04g12080,LOC_Os04g34250,LOC_Os04g34270,LOC_Os04g34290,LOC_Os04g34320,LOC_Os04g34390,LOC_Os04g38540,LOC_Os04g41640,LOC_Os04g42740,LOC_Os04g54002,LOC_Os04g…	3004	356	32072	1.55948	1	0.226962	0.0313607	5
Region g5
Type	Term	Description	Count	%	PValue	Genes	ListTotal	PopHits	PopTotal	FoldChange	Bonferroni	Benjamini	FDR	region
GOTERM_BP	GO:0043086	negative regulation of catalytic activity	13	1.09612	0.00394331	LOC_Os01g52750,LOC_Os01g58270,LOC_Os01g64850,LOC_Os02g10520,LOC_Os02g17090,LOC_Os02g53860,LOC_Os03g02750,LOC_Os03g28090,LOC_Os04g03796,LOC_Os04g47160,LOC_Os05g05640,LOC_Os07g08840,LOC_Os08g01670	1186	126	32072	2.79006	1	0.198137	0.0304198	4
GOTERM_CC	GO:0009505	plant-type cell wall	17	1.43339	0.00865754	LOC_Os01g60450,LOC_Os01g65460,LOC_Os01g66700,LOC_Os01g73170,LOC_Os02g39330,LOC_Os02g42310,LOC_Os02g42790,LOC_Os02g52040,LOC_Os02g53860,LOC_Os03g13200,LOC_Os03g49610,LOC_Os04g39100,LOC_Os04g39900,LOC_Os07g41360,LOC_Os08g44150,LOC_Os10g39560,LOC_Os11g05860	1186	214	32072	2.14821	1	0.318142	0.048844	4
GOTERM_BP	GO:0043086	negative regulation of catalytic activity	23	1.25821	1.51e-05	LOC_Os01g14940,LOC_Os01g21034,LOC_Os01g50810,LOC_Os01g56320,LOC_Os01g58240,LOC_Os01g64860,LOC_Os01g65790,LOC_Os02g01310,LOC_Os03g01020,LOC_Os03g04950,LOC_Os03g18860,LOC_Os03g62210,LOC_Os04g38560,LOC_Os04g47150,LOC_Os05g20570,LOC_Os05g46530,LOC_Os06g09340,LOC_Os07g47830,LOC_Os08g34910,LOC_Os09g26360,LOC_Os09g30250,LOC_Os09g30458,LOC_Os11g45220	1828	126	32072	3.20263	0.0082397	0.00141738	0.000205993	7
GOTERM_CC	GO:0009505	plant-type cell wall	28	1.53173	0.000274408	LOC_Os01g21034,LOC_Os01g39830,LOC_Os01g56320,LOC_Os01g56880,LOC_Os01g62260,LOC_Os01g69240,LOC_Os02g58720,LOC_Os03g08790,LOC_Os03g19610,LOC_Os03g59300,LOC_Os03g60720,LOC_Os04g32540,LOC_Os04g45270,LOC_Os04g46740,LOC_Os06g04250,LOC_Os06g08090,LOC_Os06g09340,LOC_Os06g46940,LOC_Os06g48200,LOC_Os07g26900,LOC_Os07g39740,LOC_Os07g41310,LOC_Os07g46480,LOC_Os07g47830,LOC_Os10g02040,LOC_Os10g35110,LOC_Os11g…	1828	214	32072	2.29559	0.149827	0.0210392	0.00305769	7
Region g6
Type	Term	Description	Count	%	PValue	Genes	ListTotal	PopHits	PopTotal	FoldChange	Bonferroni	Benjamini	FDR	region
GOTERM_MF	GO:0005506	iron ion binding	137	4.56059	1.06e-12	LOC_Os01g12750,LOC_Os01g12760,LOC_Os01g17170,LOC_Os01g22249,LOC_Os01g22352,LOC_Os01g24780,LOC_Os01g25010,LOC_Os01g27890,LOC_Os01g36294,LOC_Os01g43700,LOC_Os01g53020,LOC_Os01g57730,LOC_Os01g57962,LOC_Os01g61880,LOC_Os01g65902,LOC_Os01g72740,LOC_Os01g73200,LOC_Os02g01890,LOC_Os02g02230,LOC_Os02g10120,LOC_Os02g12680,LOC_Os02g12690,LOC_Os02g14430,LOC_Os02g26810,LOC_Os02g38290,LOC_Os02g39160,LOC_Os02g…	3004	717	32072	2.03999	8.27e-10	9.97e-10	1.38e-10	5
GOTERM_CC	GO:0005576	extracellular region	133	4.42743	8.97e-07	LOC_Os01g01660,LOC_Os01g03340,LOC_Os01g03390,LOC_Os01g04050,LOC_Os01g10470,LOC_Os01g10490,LOC_Os01g12070,LOC_Os01g15320,LOC_Os01g19170,LOC_Os01g28450,LOC_Os01g28600,LOC_Os01g46380,LOC_Os01g49430,LOC_Os01g54470,LOC_Os01g55350,LOC_Os01g58290,LOC_Os01g61160,LOC_Os01g72290,LOC_Os02g01150,LOC_Os02g01340,LOC_Os02g03120,LOC_Os02g14430,LOC_Os02g14460,LOC_Os02g16730,LOC_Os02g21009,LOC_Os02g32980,LOC_Os02g…	3004	883	32072	1.60811	0.000699976	0.000148995	2.06e-05	5
GOTERM_MF	GO:0016757	transferase activity, transferring glycosyl groups	76	2.52996	2.52e-06	LOC_Os01g02900,LOC_Os01g02940,LOC_Os01g08110,LOC_Os01g43270,LOC_Os01g43280,LOC_Os01g45140,LOC_Os01g49240,LOC_Os01g53370,LOC_Os01g54620,LOC_Os01g59100,LOC_Os01g70180,LOC_Os01g70200,LOC_Os02g09930,LOC_Os02g35020,LOC_Os02g35870,LOC_Os02g37690,LOC_Os02g42280,LOC_Os02g50600,LOC_Os02g51060,LOC_Os02g51900,LOC_Os02g51910,LOC_Os02g52590,LOC_Os02g52630,LOC_Os02g52640,LOC_Os02g57090,LOC_Os03g05180,LOC_Os03g…	3004	433	32072	1.87392	0.0019636	0.00037397	5.17e-05	5
GOTERM_BP	GO:0006464	cellular protein modification process	335	11.1518	0.000208012	LOC_Os01g02310,LOC_Os01g02420,LOC_Os01g02550,LOC_Os01g02560,LOC_Os01g02570,LOC_Os01g02580,LOC_Os01g02730,LOC_Os01g02750,LOC_Os01g02770,LOC_Os01g02780,LOC_Os01g02790,LOC_Os01g02800,LOC_Os01g02810,LOC_Os01g05980,LOC_Os01g10900,LOC_Os01g12160,LOC_Os01g12410,LOC_Os01g12420,LOC_Os01g12430,LOC_Os01g12790,LOC_Os01g13480,LOC_Os01g16030,LOC_Os01g16860,LOC_Os01g19880,LOC_Os01g21960,LOC_Os01g23970,LOC_Os01g…	3004	2920	32072	1.22486	0.162249	0.0206004	0.00284648	5
GOTERM_MF	GO:0016758	transferase activity, transferring hexosyl groups	37	1.23169	0.000307535	LOC_Os01g08110,LOC_Os01g43270,LOC_Os01g43280,LOC_Os01g45140,LOC_Os01g49240,LOC_Os01g53370,LOC_Os01g59100,LOC_Os02g37690,LOC_Os02g42280,LOC_Os02g51900,LOC_Os02g51910,LOC_Os03g19310,LOC_Os03g55010,LOC_Os03g55040,LOC_Os03g59030,LOC_Os04g12960,LOC_Os04g24110,LOC_Os04g37820,LOC_Os04g42690,LOC_Os04g44354,LOC_Os04g46970,LOC_Os05g08750,LOC_Os05g45200,LOC_Os05g47950,LOC_Os06g16000,LOC_Os06g18670,LOC_Os07g…	3004	194	32072	2.03623	0.239877	0.0284595	0.00393242	5
GOTERM_MF	GO:0005524	ATP binding	361	12.0173	0.000517533	LOC_Os01g02310,LOC_Os01g02370,LOC_Os01g02550,LOC_Os01g02560,LOC_Os01g02570,LOC_Os01g02580,LOC_Os01g02730,LOC_Os01g02770,LOC_Os01g02780,LOC_Os01g02790,LOC_Os01g02800,LOC_Os01g02810,LOC_Os01g05980,LOC_Os01g07150,LOC_Os01g10900,LOC_Os01g12410,LOC_Os01g12420,LOC_Os01g12430,LOC_Os01g12790,LOC_Os01g13570,LOC_Os01g18860,LOC_Os01g21960,LOC_Os01g23970,LOC_Os01g24820,LOC_Os01g25740,LOC_Os01g26210,LOC_Os01g…	3004	3219	32072	1.19733	0.403676	0.0456479	0.00630744	5
GOTERM_BP	GO:0000272	polysaccharide catabolic process	15	0.499334	0.000742794	LOC_Os01g12070,LOC_Os02g03120,LOC_Os03g22790,LOC_Os03g52630,LOC_Os04g41620,LOC_Os04g41680,LOC_Os06g50140,LOC_Os06g51050,LOC_Os06g51060,LOC_Os07g46790,LOC_Os08g02220,LOC_Os09g36350,LOC_Os10g28600,LOC_Os10g39680,LOC_Os10g41550	3004	49	32072	3.2683	0.579379	0.0599008	0.00827685	5
GOTERM_MF	GO:0005509	calcium ion binding	70	2.33023	0.000779897	LOC_Os01g22249,LOC_Os01g22352,LOC_Os01g26210,LOC_Os01g41990,LOC_Os01g55150,LOC_Os01g56030,LOC_Os01g57730,LOC_Os01g59530,LOC_Os01g61880,LOC_Os01g73200,LOC_Os02g10470,LOC_Os02g14430,LOC_Os02g21009,LOC_Os02g41500,LOC_Os02g52700,LOC_Os03g02740,LOC_Os03g02939,LOC_Os03g06580,LOC_Os03g13210,LOC_Os03g14590,LOC_Os03g42020,LOC_Os03g55420,LOC_Os03g59770,LOC_Os04g03830,LOC_Os04g14304,LOC_Os04g29960,LOC_Os04g…	3004	478	32072	1.56349	0.60832	0.0620071	0.00856788	5
GOTERM_MF	GO:0022857	transmembrane transporter activity	20	0.665779	0.00176149	LOC_Os02g13560,LOC_Os02g36414,LOC_Os02g36440,LOC_Os03g03680,LOC_Os03g04360,LOC_Os03g05620,LOC_Os03g10090,LOC_Os03g11900,LOC_Os03g39710,LOC_Os04g37970,LOC_Os04g38220,LOC_Os07g10590,LOC_Os07g37454,LOC_Os07g39360,LOC_Os08g45000,LOC_Os10g21590,LOC_Os10g40950,LOC_Os10g41190,LOC_Os11g42430,LOC_Os12g32760	3004	88	32072	2.42646	1	0.123832	0.0171107	5
GOTERM_MF	GO:0004601	peroxidase activity	32	1.06525	0.0025314	LOC_Os01g15810,LOC_Os01g22249,LOC_Os01g22352,LOC_Os01g57730,LOC_Os01g61880,LOC_Os01g73200,LOC_Os02g14430,LOC_Os03g02939,LOC_Os03g13210,LOC_Os03g55420,LOC_Os04g35520,LOC_Os04g59150,LOC_Os04g59160,LOC_Os04g59200,LOC_Os05g04380,LOC_Os05g04500,LOC_Os05g06970,LOC_Os05g38980,LOC_Os05g42000,LOC_Os06g16350,LOC_Os06g27850,LOC_Os06g33100,LOC_Os06g35480,LOC_Os06g46799,LOC_Os07g01410,LOC_Os07g48010,LOC_Os07g…	3004	182	32072	1.87717	1	0.158775	0.0219388	5
GOTERM_BP	GO:0007165	signal transduction	182	6.05859	0.00350363	LOC_Os01g02060,LOC_Os01g02310,LOC_Os01g04800,LOC_Os01g05980,LOC_Os01g06730,LOC_Os01g06870,LOC_Os01g08130,LOC_Os01g08140,LOC_Os01g10470,LOC_Os01g10900,LOC_Os01g12160,LOC_Os01g12790,LOC_Os01g12900,LOC_Os01g14110,LOC_Os01g15320,LOC_Os01g41770,LOC_Os01g41780,LOC_Os01g41910,LOC_Os01g41930,LOC_Os01g43440,LOC_Os01g43550,LOC_Os01g43950,LOC_Os01g45620,LOC_Os01g47580,LOC_Os01g47760,LOC_Os01g50100,LOC_Os01g…	3004	1560	32072	1.24558	1	0.20602	0.028467	5
GOTERM_BP	GO:0030154	cell differentiation	78	2.59654	0.00588474	LOC_Os01g02110,LOC_Os01g09670,LOC_Os01g10504,LOC_Os01g10830,LOC_Os01g10900,LOC_Os01g47190,LOC_Os01g48900,LOC_Os01g50030,LOC_Os01g50032,LOC_Os01g50100,LOC_Os01g56420,LOC_Os01g62570,LOC_Os01g63770,LOC_Os01g66030,LOC_Os02g01355,LOC_Os02g02210,LOC_Os02g02840,LOC_Os02g13150,LOC_Os02g35090,LOC_Os02g37580,LOC_Os02g38340,LOC_Os02g48450,LOC_Os02g55250,LOC_Os03g06760,LOC_Os03g08360,LOC_Os03g18370,LOC_Os03g…	3004	597	32072	1.39491	1	0.309595	0.0427786	5
GOTERM_BP	GO:0055085	transmembrane transport	68	2.26365	0.00603738	LOC_Os01g11250,LOC_Os01g12680,LOC_Os01g17214,LOC_Os01g17240,LOC_Os01g31980,LOC_Os01g50100,LOC_Os01g55200,LOC_Os02g07830,LOC_Os02g13560,LOC_Os02g21009,LOC_Os02g36414,LOC_Os02g36440,LOC_Os02g41710,LOC_Os02g43620,LOC_Os03g03680,LOC_Os03g04360,LOC_Os03g05620,LOC_Os03g06090,LOC_Os03g06520,LOC_Os03g10090,LOC_Os03g11900,LOC_Os03g39710,LOC_Os03g46454,LOC_Os03g46470,LOC_Os03g61290,LOC_Os03g64150,LOC_Os04g…	3004	507	32072	1.43195	1	0.312668	0.0432032	5
GOTERM_CC	GO:0005576	extracellular region	119	6.50985	1.1e-15	LOC_Os01g18170,LOC_Os01g21034,LOC_Os01g21070,LOC_Os01g25484,LOC_Os01g25560,LOC_Os01g33300,LOC_Os01g39600,LOC_Os01g39830,LOC_Os01g51570,LOC_Os01g58240,LOC_Os01g60770,LOC_Os01g63190,LOC_Os01g71310,LOC_Os01g71474,LOC_Os02g10300,LOC_Os02g12730,LOC_Os02g13660,LOC_Os02g15690,LOC_Os02g38920,LOC_Os02g49850,LOC_Os02g50040,LOC_Os02g53820,LOC_Os02g54060,LOC_Os03g01610,LOC_Os03g01640,LOC_Os03g01800,LOC_Os03g…	1828	883	32072	2.36448	5.99e-13	1.03e-12	1.5e-13	7
GOTERM_BP	GO:0055085	transmembrane transport	72	3.93873	9.5e-11	LOC_Os01g14520,LOC_Os01g28840,LOC_Os01g36720,LOC_Os01g43460,LOC_Os01g50080,LOC_Os01g50820,LOC_Os01g52130,LOC_Os01g60140,LOC_Os01g69070,LOC_Os01g74110,LOC_Os02g06540,LOC_Os02g14980,LOC_Os02g17500,LOC_Os02g21750,LOC_Os02g44730,LOC_Os02g45520,LOC_Os02g46680,LOC_Os02g46850,LOC_Os02g50820,LOC_Os03g01700,LOC_Os03g05640,LOC_Os03g09930,LOC_Os03g12530,LOC_Os03g12790,LOC_Os03g29850,LOC_Os03g37411,LOC_Os03g…	1828	507	32072	2.49158	5.18e-08	3.96e-08	5.76e-09	7
GOTERM_MF	GO:0005506	iron ion binding	79	4.32166	2.74e-07	LOC_Os01g12740,LOC_Os01g12770,LOC_Os01g25484,LOC_Os01g35230,LOC_Os01g39860,LOC_Os01g43740,LOC_Os01g55240,LOC_Os01g57940,LOC_Os02g02400,LOC_Os02g09200,LOC_Os02g09220,LOC_Os02g09240,LOC_Os02g12890,LOC_Os02g21810,LOC_Os02g30100,LOC_Os02g30110,LOC_Os02g40784,LOC_Os02g44654,LOC_Os02g50770,LOC_Os02g53130,LOC_Os02g58720,LOC_Os03g02920,LOC_Os03g03910,LOC_Os03g05770,LOC_Os03g13140,LOC_Os03g30420,LOC_Os03g…	1828	717	32072	1.93312	0.000149398	3.67e-05	5.34e-06	7
GOTERM_BP	GO:0007165	signal transduction	136	7.43982	3.49e-06	LOC_Os01g04230,LOC_Os01g04330,LOC_Os01g04570,LOC_Os01g06280,LOC_Os01g06790,LOC_Os01g06876,LOC_Os01g06890,LOC_Os01g06900,LOC_Os01g09100,LOC_Os01g10890,LOC_Os01g25560,LOC_Os01g39600,LOC_Os01g45090,LOC_Os01g50080,LOC_Os01g55440,LOC_Os01g57560,LOC_Os01g58420,LOC_Os01g60060,LOC_Os01g60670,LOC_Os01g68020,LOC_Os01g69080,LOC_Os01g70870,LOC_Os01g72700,LOC_Os02g02490,LOC_Os02g10760,LOC_Os02g13780,LOC_Os02g…	1828	1560	32072	1.52955	0.00190386	0.000354054	5.15e-05	7
GOTERM_MF	GO:0005524	ATP binding	232	12.6915	0.000283953	LOC_Os01g01302,LOC_Os01g04570,LOC_Os01g06280,LOC_Os01g09830,LOC_Os01g10890,LOC_Os01g13270,LOC_Os01g16400,LOC_Os01g21970,LOC_Os01g26300,LOC_Os01g39600,LOC_Os01g39970,LOC_Os01g41200,LOC_Os01g41730,LOC_Os01g43580,LOC_Os01g44110,LOC_Os01g47470,LOC_Os01g48000,LOC_Os01g50080,LOC_Os01g50420,LOC_Os01g54080,LOC_Os01g55440,LOC_Os01g56764,LOC_Os01g57560,LOC_Os01g57940,LOC_Os01g59360,LOC_Os01g60060,LOC_Os01g…	1828	3219	32072	1.26449	0.155038	0.0213356	0.00310077	7
GOTERM_MF	GO:0022857	transmembrane transporter activity	15	0.820569	0.00114756	LOC_Os02g06540,LOC_Os02g17500,LOC_Os03g05640,LOC_Os03g12790,LOC_Os03g43720,LOC_Os04g10750,LOC_Os04g10800,LOC_Os04g37980,LOC_Os04g37990,LOC_Os06g21920,LOC_Os07g39350,LOC_Os08g08070,LOC_Os10g30770,LOC_Os10g30790,LOC_Os11g28610	1828	88	32072	2.9906	0.626567	0.0743319	0.0108029	7
GOTERM_MF	GO:0005509	calcium ion binding	46	2.51641	0.00145245	LOC_Os01g04330,LOC_Os01g59360,LOC_Os02g14980,LOC_Os02g50140,LOC_Os02g50174,LOC_Os02g50770,LOC_Os02g56370,LOC_Os02g58720,LOC_Os03g02920,LOC_Os03g05770,LOC_Os03g48270,LOC_Os03g57510,LOC_Os04g30160,LOC_Os04g51030,LOC_Os04g56230,LOC_Os04g57350,LOC_Os04g59190,LOC_Os05g04490,LOC_Os05g07880,LOC_Os05g26660,LOC_Os05g43170,LOC_Os06g20150,LOC_Os06g32990,LOC_Os06g35520,LOC_Os06g40180,LOC_Os06g46950,LOC_Os06g…	1828	478	32072	1.68842	0.793037	0.0875435	0.012723	7
GOTERM_MF	GO:0004601	peroxidase activity	23	1.25821	0.0015846	LOC_Os01g63620,LOC_Os02g02400,LOC_Os02g50770,LOC_Os02g58720,LOC_Os03g02920,LOC_Os03g03910,LOC_Os03g05770,LOC_Os04g59190,LOC_Os05g04490,LOC_Os06g20150,LOC_Os06g32990,LOC_Os06g35520,LOC_Os06g48030,LOC_Os07g48020,LOC_Os07g48060,LOC_Os08g41090,LOC_Os09g29490,LOC_Os09g32964,LOC_Os10g02040,LOC_Os10g35800,LOC_Os11g43980,LOC_Os12g26290,LOC_Os12g35610	1828	182	32072	2.21721	0.865191	0.0930181	0.0135186	7
GOTERM_MF	GO:0016757	transferase activity, transferring glycosyl groups	42	2.29759	0.0020856	LOC_Os01g08090,LOC_Os01g41430,LOC_Os01g45110,LOC_Os01g52710,LOC_Os01g53460,LOC_Os01g63270,LOC_Os01g65590,LOC_Os01g69030,LOC_Os02g11640,LOC_Os02g32660,LOC_Os02g36770,LOC_Os02g51070,LOC_Os02g55910,LOC_Os02g58480,LOC_Os03g49524,LOC_Os03g55030,LOC_Os03g62090,LOC_Os04g24430,LOC_Os04g35030,LOC_Os04g46980,LOC_Os05g08740,LOC_Os05g30750,LOC_Os06g04200,LOC_Os06g06560,LOC_Os06g10930,LOC_Os06g18010,LOC_Os06g…	1828	433	32072	1.70181	1	0.116946	0.0169961	7
GOTERM_BP	GO:0000272	polysaccharide catabolic process	10	0.547046	0.00366815	LOC_Os01g18400,LOC_Os01g21070,LOC_Os02g50040,LOC_Os02g53820,LOC_Os04g41970,LOC_Os05g12150,LOC_Os09g29404,LOC_Os09g36060,LOC_Os10g11140,LOC_Os10g32810	1828	49	32072	3.58058	1	0.181327	0.0263528	7
GOTERM_BP	GO:0006464	cellular protein modification process	202	11.0503	0.00428366	LOC_Os01g04230,LOC_Os01g04570,LOC_Os01g06280,LOC_Os01g10890,LOC_Os01g20910,LOC_Os01g21970,LOC_Os01g26300,LOC_Os01g39600,LOC_Os01g39970,LOC_Os01g41730,LOC_Os01g44110,LOC_Os01g46950,LOC_Os01g47470,LOC_Os01g48000,LOC_Os01g49210,LOC_Os01g50420,LOC_Os01g53630,LOC_Os01g55440,LOC_Os01g57560,LOC_Os01g57940,LOC_Os01g58140,LOC_Os01g59360,LOC_Os01g60060,LOC_Os01g60670,LOC_Os01g60810,LOC_Os01g60860,LOC_Os01g…	1828	2920	32072	1.21372	1	0.206324	0.0299856	7
GOTERM_MF	GO:0016758	transferase activity, transferring hexosyl groups	22	1.2035	0.00637185	LOC_Os01g08090,LOC_Os01g41430,LOC_Os01g45110,LOC_Os01g52710,LOC_Os01g53460,LOC_Os02g11640,LOC_Os02g55910,LOC_Os03g49524,LOC_Os03g55030,LOC_Os04g46980,LOC_Os05g08740,LOC_Os06g18010,LOC_Os06g39330,LOC_Os07g10160,LOC_Os07g13770,LOC_Os07g32020,LOC_Os07g37690,LOC_Os08g20420,LOC_Os09g16030,LOC_Os09g16090,LOC_Os09g30510,LOC_Os12g37510	1828	194	32072	1.98962	1	0.281627	0.0409297	7
GOTERM_BP	GO:0030154	cell differentiation	51	2.78993	0.00708238	LOC_Os01g01302,LOC_Os01g03840,LOC_Os01g11550,LOC_Os01g13270,LOC_Os01g13390,LOC_Os01g50080,LOC_Os01g55100,LOC_Os01g55520,LOC_Os01g58194,LOC_Os01g59360,LOC_Os01g68540,LOC_Os01g68890,LOC_Os02g16909,LOC_Os02g17240,LOC_Os02g35660,LOC_Os02g42950,LOC_Os02g48730,LOC_Os03g14090,LOC_Os03g19560,LOC_Os03g24170,LOC_Os03g58600,LOC_Os04g50860,LOC_Os04g51440,LOC_Os05g10840,LOC_Os05g14750,LOC_Os05g24780,LOC_Os05g…	1828	597	32072	1.49881	1	0.297722	0.0432688	7
Region g7
Type	Term	Description	Count	%	PValue	Genes	ListTotal	PopHits	PopTotal	FoldChange	Bonferroni	Benjamini	FDR	region
GOTERM_BP	GO:0008152	metabolic process	434	36.5936	8.76e-20	LOC_Os01g02880,LOC_Os01g04300,LOC_Os01g04950,LOC_Os01g06450,LOC_Os01g10250,LOC_Os01g14580,LOC_Os01g14926,LOC_Os01g17050,LOC_Os01g19750,LOC_Os01g26390,LOC_Os01g27230,LOC_Os01g31760,LOC_Os01g36240,LOC_Os01g36550,LOC_Os01g41810,LOC_Os01g41820,LOC_Os01g43350,LOC_Os01g43480,LOC_Os01g43710,LOC_Os01g43774,LOC_Os01g44050,LOC_Os01g44950,LOC_Os01g44970,LOC_Os01g46030,LOC_Os01g47080,LOC_Os01g48420,LOC_Os01g…	1186	7849	32072	1.49526	3.31e-17	2.16e-16	3.31e-17	4
GOTERM_BP	GO:0009987	cellular process	364	30.6914	7.51e-10	LOC_Os01g02080,LOC_Os01g02190,LOC_Os01g06450,LOC_Os01g07870,LOC_Os01g08260,LOC_Os01g10130,LOC_Os01g10580,LOC_Os01g10600,LOC_Os01g11160,LOC_Os01g12440,LOC_Os01g14580,LOC_Os01g14926,LOC_Os01g17050,LOC_Os01g25386,LOC_Os01g26390,LOC_Os01g27160,LOC_Os01g31760,LOC_Os01g34970,LOC_Os01g36550,LOC_Os01g43350,LOC_Os01g44050,LOC_Os01g44950,LOC_Os01g46030,LOC_Os01g47080,LOC_Os01g48130,LOC_Os01g48910,LOC_Os01g…	1186	7318	32072	1.34509	2.84e-07	9.25e-07	1.42e-07	4
GOTERM_MF	GO:0003824	catalytic activity	239	20.1518	1.54e-09	LOC_Os01g02080,LOC_Os01g02880,LOC_Os01g04300,LOC_Os01g14580,LOC_Os01g19750,LOC_Os01g27230,LOC_Os01g36240,LOC_Os01g41810,LOC_Os01g41820,LOC_Os01g43710,LOC_Os01g43774,LOC_Os01g44950,LOC_Os01g47080,LOC_Os01g48420,LOC_Os01g48910,LOC_Os01g49630,LOC_Os01g49820,LOC_Os01g50490,LOC_Os01g50590,LOC_Os01g56310,LOC_Os01g56870,LOC_Os01g58740,LOC_Os01g59920,LOC_Os01g60450,LOC_Os01g61230,LOC_Os01g62420,LOC_Os01g…	1186	4383	32072	1.47458	5.82e-07	1.26e-06	1.94e-07	4
GOTERM_CC	GO:0005623	cell	162	13.6594	4.11e-09	LOC_Os01g03730,LOC_Os01g06920,LOC_Os01g14926,LOC_Os01g19750,LOC_Os01g36240,LOC_Os01g36550,LOC_Os01g41810,LOC_Os01g41820,LOC_Os01g43480,LOC_Os01g43710,LOC_Os01g43774,LOC_Os01g46030,LOC_Os01g49614,LOC_Os01g50590,LOC_Os01g53240,LOC_Os01g57710,LOC_Os01g58640,LOC_Os01g58650,LOC_Os01g58660,LOC_Os01g59550,LOC_Os01g62060,LOC_Os01g63970,LOC_Os01g64100,LOC_Os01g64850,LOC_Os01g66640,LOC_Os01g72520,LOC_Os02g…	1186	2702	32072	1.62133	1.55e-06	2.53e-06	3.88e-07	4
GOTERM_MF	GO:0005488	binding	228	19.2243	3.09e-08	LOC_Os01g07640,LOC_Os01g10580,LOC_Os01g12930,LOC_Os01g14410,LOC_Os01g14580,LOC_Os01g19750,LOC_Os01g36240,LOC_Os01g41810,LOC_Os01g41820,LOC_Os01g43710,LOC_Os01g43774,LOC_Os01g50490,LOC_Os01g50590,LOC_Os01g50900,LOC_Os01g52030,LOC_Os01g53130,LOC_Os01g56310,LOC_Os01g57470,LOC_Os01g58640,LOC_Os01g58740,LOC_Os01g59450,LOC_Os01g61230,LOC_Os01g62420,LOC_Os01g63210,LOC_Os01g63980,LOC_Os01g64100,LOC_Os01g…	1186	4287	32072	1.43821	1.17e-05	1.52e-05	2.34e-06	4
GOTERM_MF	GO:0016491	oxidoreductase activity	97	8.17875	6.83e-08	LOC_Os01g14580,LOC_Os01g27230,LOC_Os01g36240,LOC_Os01g41810,LOC_Os01g43710,LOC_Os01g43774,LOC_Os01g48420,LOC_Os01g50490,LOC_Os01g58740,LOC_Os01g59920,LOC_Os01g60450,LOC_Os01g61230,LOC_Os01g65830,LOC_Os01g66100,LOC_Os01g73170,LOC_Os01g74000,LOC_Os01g74660,LOC_Os02g11020,LOC_Os02g35500,LOC_Os02g41954,LOC_Os02g42790,LOC_Os02g47350,LOC_Os02g53180,LOC_Os02g54890,LOC_Os02g56460,LOC_Os02g57290,LOC_Os03g…	1186	1438	32072	1.82412	2.58e-05	2.49e-05	3.82e-06	4
GOTERM_BP	GO:0055114	oxidation-reduction process	99	8.34739	3.2e-07	LOC_Os01g07376,LOC_Os01g14580,LOC_Os01g27230,LOC_Os01g36240,LOC_Os01g41810,LOC_Os01g41820,LOC_Os01g43710,LOC_Os01g43774,LOC_Os01g44050,LOC_Os01g48420,LOC_Os01g50490,LOC_Os01g58740,LOC_Os01g60450,LOC_Os01g65830,LOC_Os01g66100,LOC_Os01g73170,LOC_Os01g74000,LOC_Os02g11020,LOC_Os02g35500,LOC_Os02g41954,LOC_Os02g42790,LOC_Os02g45530,LOC_Os02g47350,LOC_Os02g53180,LOC_Os02g57290,LOC_Os03g01770,LOC_Os03g…	1186	1532	32072	1.7475	0.000120814	8.74e-05	1.34e-05	4
GOTERM_BP	GO:0006629	lipid metabolic process	72	6.07083	1.4e-06	LOC_Os01g27230,LOC_Os01g31760,LOC_Os01g47080,LOC_Os01g48910,LOC_Os01g50050,LOC_Os01g50590,LOC_Os01g56310,LOC_Os01g65830,LOC_Os01g66100,LOC_Os01g70380,LOC_Os01g72520,LOC_Os02g01760,LOC_Os02g11020,LOC_Os02g41954,LOC_Os02g43700,LOC_Os02g44850,LOC_Os02g48770,LOC_Os02g56300,LOC_Os02g57290,LOC_Os03g18590,LOC_Os03g29150,LOC_Os03g30130,LOC_Os03g44300,LOC_Os03g46910,LOC_Os03g52170,LOC_Os03g52570,LOC_Os03g…	1186	1033	32072	1.88484	0.000530264	0.000345384	5.3e-05	4
GOTERM_CC	GO:0005886	plasma membrane	196	16.5261	3.25e-06	LOC_Os01g04720,LOC_Os01g04950,LOC_Os01g07376,LOC_Os01g07870,LOC_Os01g08260,LOC_Os01g10600,LOC_Os01g11160,LOC_Os01g12650,LOC_Os01g14580,LOC_Os01g14926,LOC_Os01g25386,LOC_Os01g26120,LOC_Os01g26390,LOC_Os01g34970,LOC_Os01g47730,LOC_Os01g48420,LOC_Os01g48910,LOC_Os01g49614,LOC_Os01g49820,LOC_Os01g50490,LOC_Os01g51770,LOC_Os01g52560,LOC_Os01g54590,LOC_Os01g55270,LOC_Os01g55610,LOC_Os01g60450,LOC_Os01g…	1186	3811	32072	1.39078	0.00122914	0.000727808	0.00011174	4
GOTERM_CC	GO:0048046	apoplast	33	2.78246	4.78e-06	LOC_Os01g07870,LOC_Os01g14580,LOC_Os01g50900,LOC_Os01g62420,LOC_Os01g65460,LOC_Os01g67860,LOC_Os02g01280,LOC_Os02g17900,LOC_Os02g29000,LOC_Os02g29020,LOC_Os02g33110,LOC_Os02g39330,LOC_Os02g46910,LOC_Os02g53860,LOC_Os02g55420,LOC_Os03g06940,LOC_Os03g08150,LOC_Os03g13200,LOC_Os03g15020,LOC_Os04g33740,LOC_Os05g09440,LOC_Os05g19670,LOC_Os05g35360,LOC_Os05g49880,LOC_Os06g45710,LOC_Os08g33720,LOC_Os08g…	1186	340	32072	2.62468	0.00180639	0.000980485	0.000150533	4
GOTERM_CC	GO:0016023	cytoplasmic membrane-bounded vesicle	223	18.8027	7.62e-06	LOC_Os01g01180,LOC_Os01g02190,LOC_Os01g03740,LOC_Os01g04300,LOC_Os01g04720,LOC_Os01g12650,LOC_Os01g16980,LOC_Os01g19750,LOC_Os01g25386,LOC_Os01g25540,LOC_Os01g34970,LOC_Os01g36240,LOC_Os01g41750,LOC_Os01g43710,LOC_Os01g49614,LOC_Os01g49630,LOC_Os01g50590,LOC_Os01g50900,LOC_Os01g52750,LOC_Os01g57390,LOC_Os01g57400,LOC_Os01g58660,LOC_Os01g64100,LOC_Os01g64850,LOC_Os01g65460,LOC_Os01g66640,LOC_Os01g…	1186	4509	32072	1.33741	0.00288016	0.00133998	0.000205726	4
GOTERM_MF	GO:0016787	hydrolase activity	164	13.828	9.82e-06	LOC_Os01g04300,LOC_Os01g07870,LOC_Os01g08260,LOC_Os01g10250,LOC_Os01g19750,LOC_Os01g25386,LOC_Os01g31760,LOC_Os01g34970,LOC_Os01g43480,LOC_Os01g44970,LOC_Os01g49630,LOC_Os01g49820,LOC_Os01g50622,LOC_Os01g52560,LOC_Os01g52750,LOC_Os01g58270,LOC_Os01g58640,LOC_Os01g59450,LOC_Os01g61400,LOC_Os01g64100,LOC_Os01g64850,LOC_Os01g65460,LOC_Os01g66700,LOC_Os01g70850,LOC_Os01g71094,LOC_Os01g72520,LOC_Os02g…	1186	3131	32072	1.41645	0.00371137	0.00148944	0.000228672	4
GOTERM_CC	GO:0016021	integral component of membrane	128	10.7926	1.08e-05	LOC_Os01g02190,LOC_Os01g03940,LOC_Os01g04950,LOC_Os01g06450,LOC_Os01g07870,LOC_Os01g08260,LOC_Os01g10600,LOC_Os01g11160,LOC_Os01g12650,LOC_Os01g25386,LOC_Os01g26120,LOC_Os01g34970,LOC_Os01g51040,LOC_Os01g51770,LOC_Os01g52560,LOC_Os01g57710,LOC_Os01g61960,LOC_Os01g65000,LOC_Os01g65380,LOC_Os01g65670,LOC_Os01g70380,LOC_Os02g11020,LOC_Os02g12750,LOC_Os02g13270,LOC_Os02g24598,LOC_Os02g41860,LOC_Os02g…	1186	2313	32072	1.4965	0.0040859	0.00148944	0.000228672	4
GOTERM_BP	GO:0006950	response to stress	188	15.8516	1.56e-05	LOC_Os01g02880,LOC_Os01g06520,LOC_Os01g06920,LOC_Os01g14410,LOC_Os01g14580,LOC_Os01g17050,LOC_Os01g19750,LOC_Os01g21120,LOC_Os01g25386,LOC_Os01g27230,LOC_Os01g36240,LOC_Os01g41750,LOC_Os01g48446,LOC_Os01g50622,LOC_Os01g50940,LOC_Os01g52270,LOC_Os01g53240,LOC_Os01g58740,LOC_Os01g60450,LOC_Os01g62290,LOC_Os01g62420,LOC_Os01g64100,LOC_Os01g64470,LOC_Os01g64480,LOC_Os01g67650,LOC_Os01g67860,LOC_Os01g…	1186	3723	32072	1.36555	0.00588888	0.00201878	0.000309941	4
GOTERM_MF	GO:0005215	transporter activity	93	7.84148	2.24e-05	LOC_Os01g02190,LOC_Os01g04950,LOC_Os01g07870,LOC_Os01g08260,LOC_Os01g10600,LOC_Os01g11160,LOC_Os01g25386,LOC_Os01g31760,LOC_Os01g34970,LOC_Os01g51770,LOC_Os01g52560,LOC_Os01g55610,LOC_Os01g61400,LOC_Os01g63870,LOC_Os01g64850,LOC_Os01g65000,LOC_Os01g65130,LOC_Os01g65380,LOC_Os01g65670,LOC_Os02g39910,LOC_Os02g41860,LOC_Os02g45380,LOC_Os02g58530,LOC_Os03g01290,LOC_Os03g03790,LOC_Os03g04480,LOC_Os03g…	1186	1574	32072	1.59779	0.00848233	0.00276245	0.000424116	4
GOTERM_BP	GO:0009719	response to endogenous stimulus	88	7.4199	3.55e-05	LOC_Os01g09450,LOC_Os01g27160,LOC_Os01g48446,LOC_Os01g49820,LOC_Os01g49830,LOC_Os01g50940,LOC_Os01g53240,LOC_Os01g57470,LOC_Os01g66100,LOC_Os01g67650,LOC_Os02g05060,LOC_Os02g10520,LOC_Os02g11020,LOC_Os02g12790,LOC_Os02g14600,LOC_Os02g38320,LOC_Os02g41860,LOC_Os02g42870,LOC_Os02g43820,LOC_Os02g48770,LOC_Os02g52000,LOC_Os02g52210,LOC_Os03g08330,LOC_Os03g08380,LOC_Os03g10300,LOC_Os03g10810,LOC_Os03g…	1186	1486	32072	1.60142	0.0134304	0.00397628	0.000610474	4
GOTERM_BP	GO:0005975	carbohydrate metabolic process	72	6.07083	5.65e-05	LOC_Os01g02880,LOC_Os01g04300,LOC_Os01g06450,LOC_Os01g10440,LOC_Os01g19750,LOC_Os01g44970,LOC_Os01g47080,LOC_Os01g49630,LOC_Os01g58740,LOC_Os01g62420,LOC_Os01g63970,LOC_Os01g64100,LOC_Os01g65460,LOC_Os01g66700,LOC_Os01g66940,LOC_Os01g67860,LOC_Os01g74000,LOC_Os02g17900,LOC_Os02g26720,LOC_Os02g33110,LOC_Os02g39330,LOC_Os02g46910,LOC_Os02g51590,LOC_Os02g54890,LOC_Os03g04770,LOC_Os03g06940,LOC_Os03g…	1186	1163	32072	1.67415	0.0213718	0.00605234	0.000929209	4
GOTERM_BP	GO:0080167	response to karrikin	17	1.43339	7.49e-05	LOC_Os01g49710,LOC_Os01g57470,LOC_Os01g60450,LOC_Os01g65460,LOC_Os01g67860,LOC_Os02g33110,LOC_Os02g42790,LOC_Os03g37640,LOC_Os03g59430,LOC_Os04g21320,LOC_Os04g33740,LOC_Os06g39960,LOC_Os07g49310,LOC_Os08g08840,LOC_Os10g38690,LOC_Os11g04030,LOC_Os12g03899	1186	131	32072	3.50929	0.0283265	0.00752454	0.00115523	4
GOTERM_CC	GO:0005618	cell wall	70	5.90219	8.48e-05	LOC_Os01g04300,LOC_Os01g25540,LOC_Os01g36240,LOC_Os01g41750,LOC_Os01g51770,LOC_Os01g52750,LOC_Os01g58270,LOC_Os01g60450,LOC_Os01g62290,LOC_Os01g62420,LOC_Os01g64850,LOC_Os01g65460,LOC_Os01g66700,LOC_Os01g67860,LOC_Os01g71094,LOC_Os01g73170,LOC_Os02g03140,LOC_Os02g03150,LOC_Os02g03180,LOC_Os02g10520,LOC_Os02g17090,LOC_Os02g17900,LOC_Os02g29000,LOC_Os02g29020,LOC_Os02g33110,LOC_Os02g39330,LOC_Os02g…	1186	1137	32072	1.66486	0.032059	0.00803132	0.00123304	4
GOTERM_BP	GO:0006810	transport	134	11.2985	0.000137086	LOC_Os01g02190,LOC_Os01g04950,LOC_Os01g07870,LOC_Os01g08260,LOC_Os01g10600,LOC_Os01g11160,LOC_Os01g12440,LOC_Os01g25386,LOC_Os01g31760,LOC_Os01g34970,LOC_Os01g47730,LOC_Os01g50590,LOC_Os01g51040,LOC_Os01g51770,LOC_Os01g52560,LOC_Os01g54590,LOC_Os01g55610,LOC_Os01g58650,LOC_Os01g58660,LOC_Os01g61400,LOC_Os01g63870,LOC_Os01g64850,LOC_Os01g65000,LOC_Os01g65130,LOC_Os01g65380,LOC_Os01g65670,LOC_Os02g…	1186	2596	32072	1.39586	0.0518185	0.0121064	0.00185868	4
GOTERM_MF	GO:0016798	hydrolase activity, acting on glycosyl bonds	23	1.93929	0.000140613	LOC_Os01g04300,LOC_Os01g19750,LOC_Os01g44970,LOC_Os01g49630,LOC_Os01g64100,LOC_Os01g65460,LOC_Os01g66700,LOC_Os02g33110,LOC_Os02g39330,LOC_Os03g04770,LOC_Os03g06940,LOC_Os03g10440,LOC_Os03g15020,LOC_Os03g49610,LOC_Os03g59330,LOC_Os04g33740,LOC_Os04g39900,LOC_Os04g43410,LOC_Os05g30350,LOC_Os05g35360,LOC_Os05g46520,LOC_Os07g32600,LOC_Os09g33680	1186	234	32072	2.65799	0.0531517	0.0121064	0.00185868	4
GOTERM_MF	GO:0004674	protein serine/threonine kinase activity	80	6.74536	0.000192496	LOC_Os01g14926,LOC_Os01g26390,LOC_Os01g36550,LOC_Os01g43350,LOC_Os01g46030,LOC_Os01g49614,LOC_Os01g50370,LOC_Os01g50410,LOC_Os01g59550,LOC_Os01g64480,LOC_Os01g66640,LOC_Os01g72650,LOC_Os02g02120,LOC_Os02g02780,LOC_Os02g12450,LOC_Os02g13510,LOC_Os02g20140,LOC_Os02g30540,LOC_Os02g43740,LOC_Os02g45750,LOC_Os02g48080,LOC_Os03g06330,LOC_Os03g12150,LOC_Os03g12390,LOC_Os03g15250,LOC_Os03g17700,LOC_Os03g…	1186	1389	32072	1.5575	0.0727634	0.015798	0.00242545	4
GOTERM_MF	GO:0004713	protein tyrosine kinase activity	76	6.40809	0.000251868	LOC_Os01g14926,LOC_Os01g26390,LOC_Os01g36550,LOC_Os01g43350,LOC_Os01g46030,LOC_Os01g49614,LOC_Os01g50370,LOC_Os01g50410,LOC_Os01g59550,LOC_Os01g66640,LOC_Os02g02120,LOC_Os02g02780,LOC_Os02g12450,LOC_Os02g13510,LOC_Os02g20140,LOC_Os02g30540,LOC_Os02g43740,LOC_Os02g45750,LOC_Os02g48080,LOC_Os03g06330,LOC_Os03g12150,LOC_Os03g12390,LOC_Os03g15250,LOC_Os03g17700,LOC_Os03g56160,LOC_Os04g23760,LOC_Os04g…	1186	1314	32072	1.56408	0.0952062	0.0200038	0.00307117	4
GOTERM_CC	GO:0016020	membrane	273	23.0185	0.000348889	LOC_Os01g01180,LOC_Os01g02190,LOC_Os01g04950,LOC_Os01g06450,LOC_Os01g06520,LOC_Os01g07870,LOC_Os01g08260,LOC_Os01g08510,LOC_Os01g10440,LOC_Os01g10600,LOC_Os01g11160,LOC_Os01g12650,LOC_Os01g25386,LOC_Os01g26120,LOC_Os01g31850,LOC_Os01g34970,LOC_Os01g46030,LOC_Os01g48420,LOC_Os01g49820,LOC_Os01g51040,LOC_Os01g51670,LOC_Os01g51770,LOC_Os01g52560,LOC_Os01g54590,LOC_Os01g55610,LOC_Os01g57710,LOC_Os01g…	1186	6058	32072	1.21864	0.13188	0.0268435	0.00412126	4
GOTERM_MF	GO:0046872	metal ion binding	117	9.86509	0.000383971	LOC_Os01g10580,LOC_Os01g14580,LOC_Os01g36240,LOC_Os01g41810,LOC_Os01g43710,LOC_Os01g43774,LOC_Os01g50490,LOC_Os01g50900,LOC_Os01g56310,LOC_Os01g58640,LOC_Os01g60450,LOC_Os01g63980,LOC_Os01g65830,LOC_Os01g66100,LOC_Os01g72530,LOC_Os01g73170,LOC_Os01g74040,LOC_Os02g01700,LOC_Os02g03620,LOC_Os02g05610,LOC_Os02g11020,LOC_Os02g12790,LOC_Os02g29000,LOC_Os02g29020,LOC_Os02g31890,LOC_Os02g37330,LOC_Os02g…	1186	2266	32072	1.39626	0.145141	0.0286474	0.00439821	4
GOTERM_BP	GO:0006468	protein phosphorylation	81	6.82968	0.000430513	LOC_Os01g14926,LOC_Os01g26390,LOC_Os01g36550,LOC_Os01g43350,LOC_Os01g46030,LOC_Os01g49614,LOC_Os01g50370,LOC_Os01g50410,LOC_Os01g59550,LOC_Os01g64480,LOC_Os01g66640,LOC_Os01g72650,LOC_Os02g02120,LOC_Os02g02780,LOC_Os02g12450,LOC_Os02g13510,LOC_Os02g20140,LOC_Os02g30540,LOC_Os02g43740,LOC_Os02g45750,LOC_Os02g48080,LOC_Os03g01770,LOC_Os03g06330,LOC_Os03g12150,LOC_Os03g12390,LOC_Os03g15250,LOC_Os03g…	1186	1451	32072	1.50959	0.162734	0.0311752	0.00478629	4
GOTERM_BP	GO:0009628	response to abiotic stimulus	113	9.52782	0.000532956	LOC_Os01g10580,LOC_Os01g14410,LOC_Os01g14580,LOC_Os01g17050,LOC_Os01g19750,LOC_Os01g25386,LOC_Os01g48446,LOC_Os01g53240,LOC_Os01g58740,LOC_Os01g60450,LOC_Os01g61400,LOC_Os01g62290,LOC_Os01g62420,LOC_Os01g63210,LOC_Os01g64100,LOC_Os01g65460,LOC_Os01g66100,LOC_Os01g67650,LOC_Os01g67860,LOC_Os01g70380,LOC_Os01g71094,LOC_Os02g01280,LOC_Os02g04130,LOC_Os02g08490,LOC_Os02g11020,LOC_Os02g12790,LOC_Os02g…	1186	2194	32072	1.39278	0.201457	0.036255	0.0055662	4
GOTERM_MF	GO:0019825	oxygen binding	28	2.36088	0.000544839	LOC_Os01g41810,LOC_Os01g41820,LOC_Os01g43710,LOC_Os01g43774,LOC_Os01g50490,LOC_Os01g50590,LOC_Os02g09390,LOC_Os02g11020,LOC_Os02g57290,LOC_Os03g21380,LOC_Os03g39690,LOC_Os03g44740,LOC_Os03g61980,LOC_Os05g30890,LOC_Os06g09210,LOC_Os06g09220,LOC_Os06g37364,LOC_Os06g43384,LOC_Os06g45960,LOC_Os07g29960,LOC_Os07g37970,LOC_Os08g33300,LOC_Os08g36860,LOC_Os08g43390,LOC_Os08g43440,LOC_Os10g23130,LOC_Os10g…	1186	351	32072	2.15721	0.205949	0.036255	0.0055662	4
GOTERM_MF	GO:0016301	kinase activity	111	9.35919	0.000571806	LOC_Os01g04720,LOC_Os01g14926,LOC_Os01g26390,LOC_Os01g36550,LOC_Os01g43350,LOC_Os01g46030,LOC_Os01g47080,LOC_Os01g49614,LOC_Os01g50370,LOC_Os01g50410,LOC_Os01g59550,LOC_Os01g65940,LOC_Os01g66640,LOC_Os01g66940,LOC_Os02g01760,LOC_Os02g02120,LOC_Os02g02780,LOC_Os02g11980,LOC_Os02g12450,LOC_Os02g13510,LOC_Os02g20140,LOC_Os02g26720,LOC_Os02g30540,LOC_Os02g41580,LOC_Os02g43740,LOC_Os02g45750,LOC_Os02g…	1186	2152	32072	1.39483	0.216143	0.0370482	0.00568797	4
GOTERM_MF	GO:0004672	protein kinase activity	77	6.49241	0.00126668	LOC_Os01g14926,LOC_Os01g26390,LOC_Os01g36550,LOC_Os01g43350,LOC_Os01g46030,LOC_Os01g49614,LOC_Os01g50370,LOC_Os01g50410,LOC_Os01g59550,LOC_Os01g64480,LOC_Os01g66640,LOC_Os02g02120,LOC_Os02g02780,LOC_Os02g12450,LOC_Os02g13510,LOC_Os02g20140,LOC_Os02g30540,LOC_Os02g43740,LOC_Os02g45750,LOC_Os02g48080,LOC_Os03g06330,LOC_Os03g12150,LOC_Os03g12390,LOC_Os03g15250,LOC_Os03g17700,LOC_Os03g56160,LOC_Os04g…	1186	1419	32072	1.4674	0.478805	0.0742539	0.0114001	4
GOTERM_BP	GO:0016310	phosphorylation	65	5.48061	0.00201463	LOC_Os01g04720,LOC_Os01g26390,LOC_Os01g43350,LOC_Os01g46030,LOC_Os01g47080,LOC_Os01g49614,LOC_Os01g66640,LOC_Os01g66940,LOC_Os02g01760,LOC_Os02g02120,LOC_Os02g02780,LOC_Os02g13510,LOC_Os02g26720,LOC_Os02g45750,LOC_Os02g48080,LOC_Os03g06330,LOC_Os03g12150,LOC_Os03g12390,LOC_Os03g15250,LOC_Os03g17174,LOC_Os03g17700,LOC_Os03g30130,LOC_Os03g46910,LOC_Os03g56160,LOC_Os04g23760,LOC_Os04g28780,LOC_Os04g…	1186	1174	32072	1.49722	0.76153	0.110226	0.0169229	4
GOTERM_MF	GO:0016705	oxidoreductase activity, acting on paired donors, with incorporation or reduction of molecular oxygen	25	2.10793	0.00258451	LOC_Os01g41810,LOC_Os01g41820,LOC_Os01g43710,LOC_Os01g43774,LOC_Os01g50490,LOC_Os01g60450,LOC_Os02g11020,LOC_Os02g57290,LOC_Os03g04630,LOC_Os03g04640,LOC_Os03g39690,LOC_Os03g44740,LOC_Os03g58890,LOC_Os05g30890,LOC_Os06g09220,LOC_Os06g37364,LOC_Os06g43384,LOC_Os06g45960,LOC_Os07g37970,LOC_Os08g33300,LOC_Os08g36860,LOC_Os08g43390,LOC_Os08g43440,LOC_Os10g23130,LOC_Os10g23180	1186	335	32072	2.01807	0.976945	0.138332	0.0212379	4
GOTERM_MF	GO:0020037	heme binding	34	2.86678	0.00391226	LOC_Os01g36240,LOC_Os01g41810,LOC_Os01g41820,LOC_Os01g43710,LOC_Os01g43774,LOC_Os01g50490,LOC_Os01g59450,LOC_Os01g60450,LOC_Os01g73170,LOC_Os02g11020,LOC_Os02g57290,LOC_Os03g04630,LOC_Os03g04640,LOC_Os03g13200,LOC_Os03g21380,LOC_Os03g39690,LOC_Os03g44740,LOC_Os04g01550,LOC_Os04g04750,LOC_Os04g39100,LOC_Os04g56700,LOC_Os05g30890,LOC_Os06g09220,LOC_Os06g37364,LOC_Os06g43384,LOC_Os06g45960,LOC_Os07g…	1186	530	32072	1.73478	1	0.198137	0.0304198	4
GOTERM_MF	GO:0009055	electron carrier activity	49	4.13153	0.00459296	LOC_Os01g07376,LOC_Os01g36240,LOC_Os01g41810,LOC_Os01g41820,LOC_Os01g43710,LOC_Os01g43774,LOC_Os01g50490,LOC_Os01g60450,LOC_Os01g73170,LOC_Os02g11020,LOC_Os02g48820,LOC_Os02g57290,LOC_Os03g04630,LOC_Os03g04640,LOC_Os03g05310,LOC_Os03g13200,LOC_Os03g39690,LOC_Os03g44740,LOC_Os03g57740,LOC_Os04g01550,LOC_Os04g04750,LOC_Os04g14690,LOC_Os04g39100,LOC_Os04g56700,LOC_Os05g06460,LOC_Os05g30890,LOC_Os05g…	1186	860	32072	1.54077	1	0.217466	0.0333873	4
GOTERM_MF	GO:0016772	transferase activity, transferring phosphorus-containing groups	75	6.32378	0.00472011	LOC_Os01g14926,LOC_Os01g26390,LOC_Os01g36550,LOC_Os01g43350,LOC_Os01g46030,LOC_Os01g49614,LOC_Os01g50370,LOC_Os01g50410,LOC_Os01g59550,LOC_Os01g64480,LOC_Os01g66640,LOC_Os01g72650,LOC_Os02g02120,LOC_Os02g02780,LOC_Os02g13510,LOC_Os02g43740,LOC_Os02g45750,LOC_Os02g48080,LOC_Os03g06330,LOC_Os03g12150,LOC_Os03g12390,LOC_Os03g15250,LOC_Os03g17700,LOC_Os03g56160,LOC_Os04g23760,LOC_Os04g24220,LOC_Os04g…	1186	1452	32072	1.39681	1	0.21927	0.0336642	4
GOTERM_MF	GO:0004497	monooxygenase activity	26	2.19224	0.00507998	LOC_Os01g41810,LOC_Os01g41820,LOC_Os01g43710,LOC_Os01g43774,LOC_Os01g50490,LOC_Os01g59450,LOC_Os01g60450,LOC_Os02g11020,LOC_Os02g57290,LOC_Os03g04630,LOC_Os03g04640,LOC_Os03g06654,LOC_Os03g39690,LOC_Os03g44740,LOC_Os05g30890,LOC_Os06g09220,LOC_Os06g37364,LOC_Os06g43384,LOC_Os06g45960,LOC_Os07g37970,LOC_Os08g33300,LOC_Os08g36860,LOC_Os08g43390,LOC_Os08g43440,LOC_Os10g23130,LOC_Os10g23180	1186	375	32072	1.87492	1	0.231617	0.0355598	4
GOTERM_MF	GO:0043169	cation binding	16	1.34907	0.00665436	LOC_Os01g04300,LOC_Os01g19750,LOC_Os01g64100,LOC_Os01g65460,LOC_Os03g04770,LOC_Os03g06940,LOC_Os03g10440,LOC_Os03g15020,LOC_Os03g49610,LOC_Os03g51240,LOC_Os04g39900,LOC_Os04g43410,LOC_Os05g30350,LOC_Os05g35360,LOC_Os07g32600,LOC_Os09g33680	1186	189	32072	2.28928	1	0.273059	0.0419224	4
GOTERM_MF	GO:0004553	hydrolase activity, hydrolyzing O-glycosyl compounds	22	1.85497	0.00745376	LOC_Os01g04300,LOC_Os01g19750,LOC_Os01g49630,LOC_Os01g64100,LOC_Os01g65460,LOC_Os01g66700,LOC_Os02g17900,LOC_Os02g33110,LOC_Os02g46910,LOC_Os03g06940,LOC_Os03g10440,LOC_Os03g15020,LOC_Os03g49610,LOC_Os03g51240,LOC_Os04g33740,LOC_Os04g39900,LOC_Os04g43410,LOC_Os05g30350,LOC_Os05g35360,LOC_Os07g32600,LOC_Os09g33680,LOC_Os10g05069	1186	307	32072	1.93787	1	0.291297	0.0447226	4
GOTERM_BP	GO:0008152	metabolic process	987	32.8562	5.04e-23	LOC_Os01g01660,LOC_Os01g02020,LOC_Os01g02310,LOC_Os01g02420,LOC_Os01g02550,LOC_Os01g02560,LOC_Os01g02570,LOC_Os01g02580,LOC_Os01g02730,LOC_Os01g02750,LOC_Os01g02770,LOC_Os01g02780,LOC_Os01g02790,LOC_Os01g02800,LOC_Os01g02810,LOC_Os01g02900,LOC_Os01g02940,LOC_Os01g03530,LOC_Os01g04290,LOC_Os01g06220,LOC_Os01g06730,LOC_Os01g06870,LOC_Os01g07090,LOC_Os01g08110,LOC_Os01g08380,LOC_Os01g08550,LOC_Os01g…	3004	7849	32072	1.34255	3.93e-20	2.85e-19	3.93e-20	5
GOTERM_CC	GO:0016023	cytoplasmic membrane-bounded vesicle	627	20.8722	4.34e-22	LOC_Os01g02060,LOC_Os01g02310,LOC_Os01g02420,LOC_Os01g02550,LOC_Os01g02560,LOC_Os01g02570,LOC_Os01g02730,LOC_Os01g02770,LOC_Os01g02800,LOC_Os01g02810,LOC_Os01g02870,LOC_Os01g03340,LOC_Os01g03390,LOC_Os01g03530,LOC_Os01g04050,LOC_Os01g06990,LOC_Os01g07250,LOC_Os01g10470,LOC_Os01g10490,LOC_Os01g10950,LOC_Os01g11620,LOC_Os01g11700,LOC_Os01g11710,LOC_Os01g12070,LOC_Os01g12320,LOC_Os01g12410,LOC_Os01g…	3004	4509	32072	1.48461	3.39e-19	1.23e-18	1.69e-19	5
GOTERM_CC	GO:0005623	cell	387	12.8828	5.1e-15	LOC_Os01g02420,LOC_Os01g02550,LOC_Os01g02560,LOC_Os01g02570,LOC_Os01g02580,LOC_Os01g02730,LOC_Os01g02750,LOC_Os01g02770,LOC_Os01g02780,LOC_Os01g02790,LOC_Os01g02800,LOC_Os01g02810,LOC_Os01g02870,LOC_Os01g05980,LOC_Os01g06730,LOC_Os01g06870,LOC_Os01g06990,LOC_Os01g07150,LOC_Os01g10504,LOC_Os01g11620,LOC_Os01g11700,LOC_Os01g11710,LOC_Os01g11730,LOC_Os01g12070,LOC_Os01g12320,LOC_Os01g12410,LOC_Os01g…	3004	2702	32072	1.52916	3.97e-12	7.65e-12	1.06e-12	5
GOTERM_CC	GO:0016020	membrane	749	24.9334	5.42e-15	LOC_Os01g01780,LOC_Os01g02000,LOC_Os01g02570,LOC_Os01g02870,LOC_Os01g03530,LOC_Os01g05080,LOC_Os01g05980,LOC_Os01g06580,LOC_Os01g08350,LOC_Os01g10900,LOC_Os01g10950,LOC_Os01g10960,LOC_Os01g11250,LOC_Os01g12130,LOC_Os01g12430,LOC_Os01g12460,LOC_Os01g12680,LOC_Os01g12790,LOC_Os01g12900,LOC_Os01g13130,LOC_Os01g13560,LOC_Os01g14990,LOC_Os01g16030,LOC_Os01g17170,LOC_Os01g17214,LOC_Os01g17240,LOC_Os01g…	3004	6058	32072	1.32001	4.23e-12	7.65e-12	1.06e-12	5
GOTERM_MF	GO:0003824	catalytic activity	562	18.7084	1.92e-13	LOC_Os01g01660,LOC_Os01g02020,LOC_Os01g02050,LOC_Os01g03530,LOC_Os01g07090,LOC_Os01g07850,LOC_Os01g08550,LOC_Os01g09700,LOC_Os01g10830,LOC_Os01g11710,LOC_Os01g11730,LOC_Os01g12070,LOC_Os01g12160,LOC_Os01g12560,LOC_Os01g12570,LOC_Os01g12750,LOC_Os01g12760,LOC_Os01g12940,LOC_Os01g13090,LOC_Os01g13480,LOC_Os01g13570,LOC_Os01g15810,LOC_Os01g17170,LOC_Os01g18320,LOC_Os01g22249,LOC_Os01g22352,LOC_Os01g…	3004	4383	32072	1.36896	1.5e-10	2.17e-10	3e-11	5
GOTERM_BP	GO:0006950	response to stress	485	16.1451	1.62e-12	LOC_Os01g01660,LOC_Os01g02000,LOC_Os01g03530,LOC_Os01g06730,LOC_Os01g06870,LOC_Os01g08350,LOC_Os01g09080,LOC_Os01g09280,LOC_Os01g12160,LOC_Os01g12580,LOC_Os01g15270,LOC_Os01g15810,LOC_Os01g16860,LOC_Os01g18050,LOC_Os01g18860,LOC_Os01g19820,LOC_Os01g22249,LOC_Os01g22352,LOC_Os01g24550,LOC_Os01g24820,LOC_Os01g25030,LOC_Os01g25740,LOC_Os01g27240,LOC_Os01g28450,LOC_Os01g32780,LOC_Os01g33810,LOC_Os01g…	3004	3723	32072	1.39083	1.26e-09	1.3e-09	1.8e-10	5
GOTERM_MF	GO:0009055	electron carrier activity	154	5.1265	3.22e-12	LOC_Os01g12750,LOC_Os01g12760,LOC_Os01g13480,LOC_Os01g15810,LOC_Os01g18320,LOC_Os01g22249,LOC_Os01g22352,LOC_Os01g24780,LOC_Os01g27890,LOC_Os01g36294,LOC_Os01g43700,LOC_Os01g47760,LOC_Os01g51320,LOC_Os01g53020,LOC_Os01g57730,LOC_Os01g57880,LOC_Os01g61880,LOC_Os01g65902,LOC_Os01g72740,LOC_Os01g73200,LOC_Os02g01340,LOC_Os02g01890,LOC_Os02g02230,LOC_Os02g10120,LOC_Os02g12680,LOC_Os02g12690,LOC_Os02g…	3004	860	32072	1.91183	2.51e-09	2.28e-09	3.14e-10	5
GOTERM_BP	GO:0005975	carbohydrate metabolic process	189	6.29161	1.76e-11	LOC_Os01g04290,LOC_Os01g07850,LOC_Os01g11700,LOC_Os01g12070,LOC_Os01g19170,LOC_Os01g22640,LOC_Os01g22660,LOC_Os01g42350,LOC_Os01g42380,LOC_Os01g42810,LOC_Os01g46120,LOC_Os01g53930,LOC_Os01g54620,LOC_Os01g56570,LOC_Os01g57770,LOC_Os01g59840,LOC_Os01g63220,LOC_Os01g64110,LOC_Os01g70180,LOC_Os01g70200,LOC_Os01g70520,LOC_Os01g71380,LOC_Os01g71700,LOC_Os01g71860,LOC_Os02g03120,LOC_Os02g05030,LOC_Os02g…	3004	1163	32072	1.73503	1.38e-08	1.11e-08	1.53e-09	5
GOTERM_BP	GO:0055114	oxidation-reduction process	228	7.58988	2.05e-10	LOC_Os01g03530,LOC_Os01g12750,LOC_Os01g12760,LOC_Os01g15810,LOC_Os01g17170,LOC_Os01g18320,LOC_Os01g22249,LOC_Os01g22352,LOC_Os01g24780,LOC_Os01g25010,LOC_Os01g27240,LOC_Os01g27890,LOC_Os01g36294,LOC_Os01g43700,LOC_Os01g46380,LOC_Os01g51320,LOC_Os01g53200,LOC_Os01g54030,LOC_Os01g57730,LOC_Os01g61160,LOC_Os01g61880,LOC_Os01g64520,LOC_Os01g65902,LOC_Os01g67370,LOC_Os01g72740,LOC_Os01g73200,LOC_Os02g…	3004	1532	32072	1.58892	1.6e-07	1.16e-07	1.6e-08	5
GOTERM_MF	GO:0016491	oxidoreductase activity	213	7.09055	1.22e-09	LOC_Os01g03530,LOC_Os01g12750,LOC_Os01g12760,LOC_Os01g13480,LOC_Os01g15810,LOC_Os01g17170,LOC_Os01g18320,LOC_Os01g22249,LOC_Os01g22352,LOC_Os01g24780,LOC_Os01g25010,LOC_Os01g27240,LOC_Os01g27890,LOC_Os01g43700,LOC_Os01g46380,LOC_Os01g51320,LOC_Os01g53200,LOC_Os01g54030,LOC_Os01g57730,LOC_Os01g61160,LOC_Os01g61880,LOC_Os01g64520,LOC_Os01g67370,LOC_Os01g72740,LOC_Os01g73200,LOC_Os02g01340,LOC_Os02g…	3004	1438	32072	1.58142	9.51e-07	6.26e-07	8.64e-08	5
GOTERM_MF	GO:0020037	heme binding	101	3.36218	1.34e-09	LOC_Os01g12750,LOC_Os01g12760,LOC_Os01g15810,LOC_Os01g22249,LOC_Os01g22352,LOC_Os01g24780,LOC_Os01g27890,LOC_Os01g36294,LOC_Os01g43700,LOC_Os01g57730,LOC_Os01g65902,LOC_Os01g72740,LOC_Os01g73200,LOC_Os02g01890,LOC_Os02g02230,LOC_Os02g12680,LOC_Os02g12690,LOC_Os02g14430,LOC_Os02g26810,LOC_Os02g38290,LOC_Os02g42740,LOC_Os03g02939,LOC_Os03g04190,LOC_Os03g04530,LOC_Os03g04650,LOC_Os03g04660,LOC_Os03g…	3004	530	32072	2.03457	1.05e-06	6.29e-07	8.69e-08	5
GOTERM_BP	GO:0009987	cellular process	826	27.4967	7.71e-09	LOC_Os01g01350,LOC_Os01g02310,LOC_Os01g02420,LOC_Os01g02550,LOC_Os01g02560,LOC_Os01g02570,LOC_Os01g02580,LOC_Os01g02730,LOC_Os01g02750,LOC_Os01g02770,LOC_Os01g02780,LOC_Os01g02790,LOC_Os01g02800,LOC_Os01g02810,LOC_Os01g06580,LOC_Os01g06730,LOC_Os01g06870,LOC_Os01g07090,LOC_Os01g08110,LOC_Os01g09700,LOC_Os01g10830,LOC_Os01g11250,LOC_Os01g11940,LOC_Os01g12130,LOC_Os01g12160,LOC_Os01g12460,LOC_Os01g…	3004	7318	32072	1.20507	6.01e-06	2.9e-06	4.01e-07	5
GOTERM_BP	GO:0009628	response to abiotic stimulus	292	9.72037	1.55e-08	LOC_Os01g03530,LOC_Os01g04800,LOC_Os01g08130,LOC_Os01g08140,LOC_Os01g09280,LOC_Os01g11940,LOC_Os01g12160,LOC_Os01g12580,LOC_Os01g17240,LOC_Os01g18050,LOC_Os01g18860,LOC_Os01g20970,LOC_Os01g22249,LOC_Os01g22920,LOC_Os01g24820,LOC_Os01g38229,LOC_Os01g39020,LOC_Os01g41900,LOC_Os01g44360,LOC_Os01g46760,LOC_Os01g47410,LOC_Os01g49240,LOC_Os01g49430,LOC_Os01g50100,LOC_Os01g53900,LOC_Os01g54620,LOC_Os01g…	3004	2194	32072	1.42093	1.21e-05	5.48e-06	7.58e-07	5
GOTERM_MF	GO:0005215	transporter activity	221	7.35686	2.95e-08	LOC_Os01g11250,LOC_Os01g12130,LOC_Os01g12680,LOC_Os01g13130,LOC_Os01g16030,LOC_Os01g17214,LOC_Os01g17240,LOC_Os01g31940,LOC_Os01g31980,LOC_Os01g42350,LOC_Os01g42380,LOC_Os01g42410,LOC_Os01g42900,LOC_Os01g45750,LOC_Os01g50100,LOC_Os01g50616,LOC_Os01g55200,LOC_Os01g56420,LOC_Os01g58010,LOC_Os01g61940,LOC_Os01g63770,LOC_Os01g64890,LOC_Os01g65100,LOC_Os01g65110,LOC_Os01g65169,LOC_Os01g65880,LOC_Os01g…	3004	1574	32072	1.49904	2.3e-05	8.76e-06	1.21e-06	5
GOTERM_MF	GO:0046872	metal ion binding	295	9.82024	8.22e-08	LOC_Os01g03530,LOC_Os01g07090,LOC_Os01g09620,LOC_Os01g09660,LOC_Os01g10400,LOC_Os01g12750,LOC_Os01g12760,LOC_Os01g15810,LOC_Os01g17170,LOC_Os01g18860,LOC_Os01g20830,LOC_Os01g20930,LOC_Os01g22249,LOC_Os01g22352,LOC_Os01g24780,LOC_Os01g27890,LOC_Os01g41990,LOC_Os01g43100,LOC_Os01g43700,LOC_Os01g46380,LOC_Os01g46760,LOC_Os01g47760,LOC_Os01g54030,LOC_Os01g54620,LOC_Os01g57650,LOC_Os01g57730,LOC_Os01g…	3004	2266	32072	1.38991	6.41e-05	2.21e-05	3.05e-06	5
GOTERM_CC	GO:0005618	cell wall	167	5.55925	1.4e-07	LOC_Os01g03530,LOC_Os01g08350,LOC_Os01g10950,LOC_Os01g10960,LOC_Os01g11620,LOC_Os01g11710,LOC_Os01g11730,LOC_Os01g18860,LOC_Os01g20980,LOC_Os01g28450,LOC_Os01g41770,LOC_Os01g41780,LOC_Os01g41930,LOC_Os01g44250,LOC_Os01g46120,LOC_Os01g46380,LOC_Os01g49430,LOC_Os01g53790,LOC_Os01g54620,LOC_Os01g57854,LOC_Os01g58290,LOC_Os01g67240,LOC_Os01g71060,LOC_Os01g71380,LOC_Os01g71860,LOC_Os01g72290,LOC_Os01g…	3004	1137	32072	1.56813	0.000109456	3.37e-05	4.66e-06	5
GOTERM_BP	GO:0006468	protein phosphorylation	203	6.75766	1.43e-07	LOC_Os01g02310,LOC_Os01g02370,LOC_Os01g02550,LOC_Os01g02560,LOC_Os01g02570,LOC_Os01g02580,LOC_Os01g02730,LOC_Os01g02770,LOC_Os01g02780,LOC_Os01g02790,LOC_Os01g02800,LOC_Os01g02810,LOC_Os01g05980,LOC_Os01g10900,LOC_Os01g12410,LOC_Os01g12420,LOC_Os01g12430,LOC_Os01g12790,LOC_Os01g21960,LOC_Os01g23970,LOC_Os01g26210,LOC_Os01g33110,LOC_Os01g36790,LOC_Os01g45380,LOC_Os01g45620,LOC_Os01g46720,LOC_Os01g…	3004	1451	32072	1.49367	0.000111781	3.37e-05	4.66e-06	5
GOTERM_MF	GO:0004672	protein kinase activity	199	6.6245	1.65e-07	LOC_Os01g02310,LOC_Os01g02370,LOC_Os01g02550,LOC_Os01g02560,LOC_Os01g02570,LOC_Os01g02580,LOC_Os01g02730,LOC_Os01g02770,LOC_Os01g02780,LOC_Os01g02790,LOC_Os01g02800,LOC_Os01g02810,LOC_Os01g05980,LOC_Os01g10900,LOC_Os01g12420,LOC_Os01g12430,LOC_Os01g12790,LOC_Os01g21960,LOC_Os01g23970,LOC_Os01g26210,LOC_Os01g33110,LOC_Os01g36790,LOC_Os01g45380,LOC_Os01g45620,LOC_Os01g46720,LOC_Os01g53840,LOC_Os01g…	3004	1419	32072	1.49726	0.000129037	3.63e-05	5.02e-06	5
GOTERM_MF	GO:0004713	protein tyrosine kinase activity	187	6.22503	1.67e-07	LOC_Os01g02310,LOC_Os01g02550,LOC_Os01g02560,LOC_Os01g02570,LOC_Os01g02580,LOC_Os01g02730,LOC_Os01g02770,LOC_Os01g02780,LOC_Os01g02790,LOC_Os01g02800,LOC_Os01g02810,LOC_Os01g05980,LOC_Os01g10900,LOC_Os01g12420,LOC_Os01g12430,LOC_Os01g12790,LOC_Os01g21960,LOC_Os01g23970,LOC_Os01g26210,LOC_Os01g33110,LOC_Os01g36790,LOC_Os01g45380,LOC_Os01g45620,LOC_Os01g53840,LOC_Os01g55450,LOC_Os01g57510,LOC_Os01g…	3004	1314	32072	1.5194	0.000130582	3.63e-05	5.02e-06	5
GOTERM_BP	GO:0006810	transport	328	10.9188	1.92e-07	LOC_Os01g01350,LOC_Os01g02000,LOC_Os01g09660,LOC_Os01g11250,LOC_Os01g12130,LOC_Os01g12680,LOC_Os01g12900,LOC_Os01g13130,LOC_Os01g17214,LOC_Os01g17240,LOC_Os01g20830,LOC_Os01g28600,LOC_Os01g31940,LOC_Os01g31980,LOC_Os01g41910,LOC_Os01g42350,LOC_Os01g42380,LOC_Os01g42410,LOC_Os01g42900,LOC_Os01g43100,LOC_Os01g45750,LOC_Os01g47760,LOC_Os01g48900,LOC_Os01g50100,LOC_Os01g50616,LOC_Os01g55200,LOC_Os01g…	3004	2596	32072	1.34895	0.000149676	4.01e-05	5.54e-06	5
GOTERM_MF	GO:0004674	protein serine/threonine kinase activity	195	6.49134	2.08e-07	LOC_Os01g02310,LOC_Os01g02370,LOC_Os01g02550,LOC_Os01g02560,LOC_Os01g02570,LOC_Os01g02580,LOC_Os01g02730,LOC_Os01g02770,LOC_Os01g02780,LOC_Os01g02790,LOC_Os01g02800,LOC_Os01g02810,LOC_Os01g05980,LOC_Os01g10900,LOC_Os01g12410,LOC_Os01g12420,LOC_Os01g12430,LOC_Os01g12790,LOC_Os01g21960,LOC_Os01g23970,LOC_Os01g26210,LOC_Os01g33110,LOC_Os01g36790,LOC_Os01g45380,LOC_Os01g45620,LOC_Os01g46720,LOC_Os01g…	3004	1389	32072	1.49885	0.000162618	4.06e-05	5.61e-06	5
GOTERM_MF	GO:0016705	oxidoreductase activity, acting on paired donors, with incorporation or reduction of molecular oxygen	67	2.23036	2.12e-07	LOC_Os01g12750,LOC_Os01g12760,LOC_Os01g24780,LOC_Os01g27890,LOC_Os01g36294,LOC_Os01g43700,LOC_Os01g72740,LOC_Os02g01890,LOC_Os02g02230,LOC_Os02g12680,LOC_Os02g12690,LOC_Os02g26810,LOC_Os02g38290,LOC_Os03g04190,LOC_Os03g04530,LOC_Os03g04650,LOC_Os03g04660,LOC_Os03g12260,LOC_Os03g14400,LOC_Os03g14560,LOC_Os03g21400,LOC_Os03g25500,LOC_Os03g39760,LOC_Os03g40600,LOC_Os03g40610,LOC_Os04g08824,LOC_Os04g…	3004	335	32072	2.13529	0.000165218	4.06e-05	5.61e-06	5
GOTERM_MF	GO:0005488	binding	505	16.8109	2.16e-07	LOC_Os01g01660,LOC_Os01g03530,LOC_Os01g08350,LOC_Os01g09660,LOC_Os01g10400,LOC_Os01g12570,LOC_Os01g12750,LOC_Os01g12760,LOC_Os01g15810,LOC_Os01g16030,LOC_Os01g17330,LOC_Os01g19800,LOC_Os01g20830,LOC_Os01g20930,LOC_Os01g22352,LOC_Os01g24780,LOC_Os01g26970,LOC_Os01g27890,LOC_Os01g33869,LOC_Os01g36294,LOC_Os01g38229,LOC_Os01g40680,LOC_Os01g41990,LOC_Os01g43700,LOC_Os01g44360,LOC_Os01g46380,LOC_Os01g…	3004	4287	32072	1.25766	0.000168395	4.06e-05	5.61e-06	5
GOTERM_BP	GO:0009719	response to endogenous stimulus	204	6.79095	4.4e-07	LOC_Os01g04800,LOC_Os01g09280,LOC_Os01g10830,LOC_Os01g12160,LOC_Os01g12900,LOC_Os01g14110,LOC_Os01g17330,LOC_Os01g24550,LOC_Os01g28450,LOC_Os01g41900,LOC_Os01g42350,LOC_Os01g42380,LOC_Os01g43440,LOC_Os01g43550,LOC_Os01g43950,LOC_Os01g45620,LOC_Os01g46760,LOC_Os01g47580,LOC_Os01g47760,LOC_Os01g50100,LOC_Os01g63770,LOC_Os01g64790,LOC_Os01g65920,LOC_Os01g67310,LOC_Os02g01355,LOC_Os02g10120,LOC_Os02g…	3004	1486	32072	1.46567	0.000342992	7.76e-05	1.07e-05	5
GOTERM_CC	GO:0005886	plasma membrane	452	15.0466	5.65e-07	LOC_Os01g01660,LOC_Os01g02000,LOC_Os01g02060,LOC_Os01g06580,LOC_Os01g07890,LOC_Os01g09620,LOC_Os01g09880,LOC_Os01g11250,LOC_Os01g12130,LOC_Os01g12580,LOC_Os01g12640,LOC_Os01g12680,LOC_Os01g12900,LOC_Os01g13140,LOC_Os01g13560,LOC_Os01g16030,LOC_Os01g18050,LOC_Os01g18860,LOC_Os01g19610,LOC_Os01g21960,LOC_Os01g24820,LOC_Os01g26210,LOC_Os01g31980,LOC_Os01g33110,LOC_Os01g33810,LOC_Os01g34690,LOC_Os01g…	3004	3811	32072	1.26627	0.000441013	9.67e-05	1.34e-05	5
GOTERM_MF	GO:0004553	hydrolase activity, hydrolyzing O-glycosyl compounds	61	2.03063	9.27e-07	LOC_Os01g12070,LOC_Os01g64110,LOC_Os01g70520,LOC_Os01g71380,LOC_Os01g71700,LOC_Os01g71860,LOC_Os02g03120,LOC_Os02g16270,LOC_Os02g51620,LOC_Os03g11420,LOC_Os03g12140,LOC_Os03g25790,LOC_Os03g27980,LOC_Os03g49600,LOC_Os03g52630,LOC_Os03g53860,LOC_Os03g63760,LOC_Os04g27980,LOC_Os04g39864,LOC_Os04g39880,LOC_Os04g43360,LOC_Os04g44840,LOC_Os04g56930,LOC_Os05g30250,LOC_Os05g32710,LOC_Os05g34320,LOC_Os06g…	3004	307	32072	2.12138	0.000723191	0.000149538	2.07e-05	5
GOTERM_MF	GO:0004497	monooxygenase activity	69	2.29694	1.87e-06	LOC_Os01g12750,LOC_Os01g12760,LOC_Os01g24780,LOC_Os01g27890,LOC_Os01g36294,LOC_Os01g43700,LOC_Os01g53200,LOC_Os01g72740,LOC_Os02g01890,LOC_Os02g02230,LOC_Os02g12680,LOC_Os02g12690,LOC_Os02g26810,LOC_Os02g38290,LOC_Os02g51080,LOC_Os03g04190,LOC_Os03g04530,LOC_Os03g04650,LOC_Os03g04660,LOC_Os03g12260,LOC_Os03g14400,LOC_Os03g14560,LOC_Os03g21400,LOC_Os03g25500,LOC_Os03g39760,LOC_Os03g40600,LOC_Os03g…	3004	375	32072	1.96446	0.00145517	0.00028463	3.93e-05	5
GOTERM_MF	GO:0016772	transferase activity, transferring phosphorus-containing groups	195	6.49134	2.88e-06	LOC_Os01g02310,LOC_Os01g02370,LOC_Os01g02550,LOC_Os01g02560,LOC_Os01g02570,LOC_Os01g02580,LOC_Os01g02770,LOC_Os01g02780,LOC_Os01g02790,LOC_Os01g02800,LOC_Os01g02810,LOC_Os01g05980,LOC_Os01g10900,LOC_Os01g12420,LOC_Os01g12430,LOC_Os01g12790,LOC_Os01g21960,LOC_Os01g23970,LOC_Os01g26210,LOC_Os01g33110,LOC_Os01g36790,LOC_Os01g45380,LOC_Os01g45620,LOC_Os01g46720,LOC_Os01g53840,LOC_Os01g55450,LOC_Os01g…	3004	1452	32072	1.43382	0.00224925	0.000417389	5.77e-05	5
GOTERM_MF	GO:0043169	cation binding	42	1.39814	5.52e-06	LOC_Os01g70520,LOC_Os01g71380,LOC_Os02g52700,LOC_Os03g11420,LOC_Os03g12140,LOC_Os03g22790,LOC_Os03g25790,LOC_Os03g27980,LOC_Os03g49600,LOC_Os04g27980,LOC_Os04g39864,LOC_Os04g39880,LOC_Os04g43360,LOC_Os05g30250,LOC_Os05g32710,LOC_Os05g34320,LOC_Os07g13580,LOC_Os07g35510,LOC_Os07g35560,LOC_Os07g38930,LOC_Os07g43820,LOC_Os07g46280,LOC_Os07g46790,LOC_Os08g36910,LOC_Os08g39860,LOC_Os08g39870,LOC_Os08g…	3004	189	32072	2.37254	0.00430839	0.000779512	0.00010771	5
GOTERM_MF	GO:0019825	oxygen binding	64	2.13049	5.82e-06	LOC_Os01g12750,LOC_Os01g12760,LOC_Os01g24780,LOC_Os01g27890,LOC_Os01g36294,LOC_Os01g43700,LOC_Os01g72260,LOC_Os01g72270,LOC_Os01g72740,LOC_Os02g01890,LOC_Os02g02230,LOC_Os02g12680,LOC_Os02g12690,LOC_Os02g38290,LOC_Os03g04190,LOC_Os03g12260,LOC_Os03g12510,LOC_Os03g14560,LOC_Os03g21400,LOC_Os03g25500,LOC_Os03g39760,LOC_Os03g40600,LOC_Os03g40610,LOC_Os04g08824,LOC_Os04g08828,LOC_Os04g09430,LOC_Os04g…	3004	351	32072	1.9467	0.0045361	0.000800694	0.000110637	5
GOTERM_CC	GO:0016021	integral component of membrane	286	9.52064	6.09e-06	LOC_Os01g02000,LOC_Os01g05980,LOC_Os01g10900,LOC_Os01g11250,LOC_Os01g12130,LOC_Os01g12680,LOC_Os01g12790,LOC_Os01g13130,LOC_Os01g13560,LOC_Os01g17214,LOC_Os01g17240,LOC_Os01g20780,LOC_Os01g31940,LOC_Os01g33110,LOC_Os01g42350,LOC_Os01g42380,LOC_Os01g42410,LOC_Os01g45750,LOC_Os01g47635,LOC_Os01g50100,LOC_Os01g52610,LOC_Os01g53930,LOC_Os01g54620,LOC_Os01g55200,LOC_Os01g56420,LOC_Os01g57004,LOC_Os01g…	3004	2313	32072	1.32013	0.0047524	0.000818901	0.000113152	5
GOTERM_MF	GO:0016301	kinase activity	268	8.92144	7.75e-06	LOC_Os01g02310,LOC_Os01g02370,LOC_Os01g02420,LOC_Os01g02550,LOC_Os01g02560,LOC_Os01g02570,LOC_Os01g02580,LOC_Os01g02730,LOC_Os01g02750,LOC_Os01g02770,LOC_Os01g02780,LOC_Os01g02790,LOC_Os01g02800,LOC_Os01g02810,LOC_Os01g05980,LOC_Os01g06730,LOC_Os01g06870,LOC_Os01g10900,LOC_Os01g12410,LOC_Os01g12420,LOC_Os01g12430,LOC_Os01g12790,LOC_Os01g21960,LOC_Os01g23970,LOC_Os01g26210,LOC_Os01g33110,LOC_Os01g…	3004	2152	32072	1.32959	0.00604417	0.00101727	0.000140562	5
GOTERM_CC	GO:0048046	apoplast	61	2.03063	1.49e-05	LOC_Os01g46380,LOC_Os01g55350,LOC_Os01g61160,LOC_Os01g71380,LOC_Os01g72290,LOC_Os02g01150,LOC_Os02g01340,LOC_Os02g32980,LOC_Os02g41590,LOC_Os02g42350,LOC_Os02g47020,LOC_Os02g51440,LOC_Os02g52700,LOC_Os03g03720,LOC_Os03g11420,LOC_Os03g16050,LOC_Os03g16610,LOC_Os03g20420,LOC_Os03g44880,LOC_Os03g63760,LOC_Os04g38600,LOC_Os04g41340,LOC_Os04g41620,LOC_Os04g41680,LOC_Os04g53230,LOC_Os04g56400,LOC_Os04g…	3004	340	32072	1.91548	0.011646	0.00187298	0.000258801	5
GOTERM_BP	GO:0080167	response to karrikin	31	1.03196	4.03e-05	LOC_Os01g03530,LOC_Os01g17214,LOC_Os01g64960,LOC_Os03g08360,LOC_Os03g16950,LOC_Os03g18030,LOC_Os03g63970,LOC_Os04g24140,LOC_Os04g56930,LOC_Os07g07420,LOC_Os07g28480,LOC_Os07g33310,LOC_Os07g37030,LOC_Os08g01380,LOC_Os08g33820,LOC_Os09g08072,LOC_Os09g34214,LOC_Os09g34230,LOC_Os09g34250,LOC_Os10g38189,LOC_Os10g38360,LOC_Os10g38489,LOC_Os10g38590,LOC_Os10g38670,LOC_Os10g38700,LOC_Os10g38730,LOC_Os11g…	3004	131	32072	2.52648	0.0314136	0.00483713	0.000668375	5
GOTERM_MF	GO:0016787	hydrolase activity	357	11.8842	0.000190252	LOC_Os01g04290,LOC_Os01g06220,LOC_Os01g06740,LOC_Os01g07090,LOC_Os01g11620,LOC_Os01g11700,LOC_Os01g11710,LOC_Os01g11730,LOC_Os01g12070,LOC_Os01g12320,LOC_Os01g12900,LOC_Os01g12920,LOC_Os01g19170,LOC_Os01g20970,LOC_Os01g20980,LOC_Os01g22640,LOC_Os01g22660,LOC_Os01g22980,LOC_Os01g24550,LOC_Os01g24560,LOC_Os01g25360,LOC_Os01g37630,LOC_Os01g37910,LOC_Os01g40630,LOC_Os01g42320,LOC_Os01g42350,LOC_Os01g…	3004	3131	32072	1.21734	0.148397	0.0201664	0.00278651	5
GOTERM_MF	GO:0016798	hydrolase activity, acting on glycosyl bonds	43	1.43142	0.000192839	LOC_Os01g12070,LOC_Os01g19170,LOC_Os01g64110,LOC_Os01g70520,LOC_Os01g71380,LOC_Os01g71860,LOC_Os02g03120,LOC_Os02g54030,LOC_Os02g55870,LOC_Os03g11320,LOC_Os03g11420,LOC_Os03g27980,LOC_Os03g49600,LOC_Os03g52630,LOC_Os04g27980,LOC_Os04g39864,LOC_Os04g39880,LOC_Os04g41620,LOC_Os04g41680,LOC_Os04g56930,LOC_Os05g30250,LOC_Os05g34320,LOC_Os06g50140,LOC_Os06g51050,LOC_Os06g51060,LOC_Os07g46280,LOC_Os08g…	3004	234	32072	1.96191	0.150415	0.0201664	0.00278651	5
GOTERM_BP	GO:0006629	lipid metabolic process	131	4.36085	0.00104001	LOC_Os01g07250,LOC_Os01g10830,LOC_Os01g11620,LOC_Os01g11700,LOC_Os01g11710,LOC_Os01g11730,LOC_Os01g12160,LOC_Os01g12320,LOC_Os01g14630,LOC_Os01g22640,LOC_Os01g22660,LOC_Os01g22920,LOC_Os01g27240,LOC_Os01g46120,LOC_Os01g46130,LOC_Os01g47410,LOC_Os01g50030,LOC_Os01g50032,LOC_Os01g54470,LOC_Os01g54620,LOC_Os01g57770,LOC_Os01g67310,LOC_Os02g01980,LOC_Os02g02230,LOC_Os02g02930,LOC_Os02g03720,LOC_Os02g…	3004	1033	32072	1.35393	0.811205	0.0793353	0.0109622	5
GOTERM_BP	GO:0016310	phosphorylation	146	4.86019	0.00109134	LOC_Os01g02370,LOC_Os01g02550,LOC_Os01g02560,LOC_Os01g02570,LOC_Os01g02580,LOC_Os01g02770,LOC_Os01g02780,LOC_Os01g02800,LOC_Os01g02810,LOC_Os01g10900,LOC_Os01g12420,LOC_Os01g12430,LOC_Os01g21960,LOC_Os01g23970,LOC_Os01g33110,LOC_Os01g36790,LOC_Os01g45380,LOC_Os01g45620,LOC_Os01g53930,LOC_Os01g55450,LOC_Os01g57510,LOC_Os01g59570,LOC_Os01g60280,LOC_Os01g63220,LOC_Os01g65650,LOC_Os01g66860,LOC_Os02g…	3004	1174	32072	1.32773	0.851245	0.0812877	0.011232	5
GOTERM_CC	GO:0016023	cytoplasmic membrane-bounded vesicle	439	24.0153	6.61e-28	LOC_Os01g02130,LOC_Os01g03549,LOC_Os01g03640,LOC_Os01g04230,LOC_Os01g04570,LOC_Os01g06280,LOC_Os01g06620,LOC_Os01g06790,LOC_Os01g09540,LOC_Os01g11670,LOC_Os01g12740,LOC_Os01g12770,LOC_Os01g13440,LOC_Os01g14850,LOC_Os01g14940,LOC_Os01g18170,LOC_Os01g21630,LOC_Os01g22670,LOC_Os01g22680,LOC_Os01g25460,LOC_Os01g25560,LOC_Os01g27140,LOC_Os01g33300,LOC_Os01g36350,LOC_Os01g39600,LOC_Os01g39830,LOC_Os01g…	1828	4509	32072	1.70818	3.61e-25	2.48e-24	3.61e-25	7
GOTERM_BP	GO:0008152	metabolic process	647	35.3939	4.42e-24	LOC_Os01g01710,LOC_Os01g03549,LOC_Os01g03640,LOC_Os01g04330,LOC_Os01g04570,LOC_Os01g04920,LOC_Os01g05840,LOC_Os01g06280,LOC_Os01g06790,LOC_Os01g06876,LOC_Os01g06890,LOC_Os01g06900,LOC_Os01g08090,LOC_Os01g08220,LOC_Os01g08780,LOC_Os01g09030,LOC_Os01g09540,LOC_Os01g09830,LOC_Os01g10890,LOC_Os01g11660,LOC_Os01g12304,LOC_Os01g12490,LOC_Os01g12740,LOC_Os01g12770,LOC_Os01g13270,LOC_Os01g14940,LOC_Os01g…	1828	7849	32072	1.44624	2.42e-21	8.31e-21	1.21e-21	7
GOTERM_CC	GO:0005623	cell	289	15.8096	4.57e-23	LOC_Os01g04230,LOC_Os01g04570,LOC_Os01g04710,LOC_Os01g06790,LOC_Os01g06890,LOC_Os01g06900,LOC_Os01g11460,LOC_Os01g11660,LOC_Os01g12304,LOC_Os01g14940,LOC_Os01g18400,LOC_Os01g21070,LOC_Os01g21630,LOC_Os01g22670,LOC_Os01g26340,LOC_Os01g33300,LOC_Os01g39600,LOC_Os01g41200,LOC_Os01g41240,LOC_Os01g43740,LOC_Os01g46350,LOC_Os01g49320,LOC_Os01g56320,LOC_Os01g59050,LOC_Os01g60060,LOC_Os01g60670,LOC_Os01g…	1828	2702	32072	1.87656	2.5e-20	5.73e-20	8.32e-21	7
GOTERM_CC	GO:0005886	plasma membrane	327	17.8884	4.34e-13	LOC_Os01g04330,LOC_Os01g06280,LOC_Os01g08020,LOC_Os01g13270,LOC_Os01g14520,LOC_Os01g16400,LOC_Os01g21034,LOC_Os01g21300,LOC_Os01g21310,LOC_Os01g21970,LOC_Os01g26300,LOC_Os01g27880,LOC_Os01g28840,LOC_Os01g33160,LOC_Os01g36720,LOC_Os01g43460,LOC_Os01g43580,LOC_Os01g48000,LOC_Os01g48410,LOC_Os01g50080,LOC_Os01g50820,LOC_Os01g51570,LOC_Os01g51840,LOC_Os01g52470,LOC_Os01g52660,LOC_Os01g54080,LOC_Os01g…	1828	3811	32072	1.50542	2.37e-10	3.26e-10	4.74e-11	7
GOTERM_BP	GO:0009987	cellular process	550	30.0875	2.61e-12	LOC_Os01g01160,LOC_Os01g01302,LOC_Os01g01710,LOC_Os01g04570,LOC_Os01g04920,LOC_Os01g06280,LOC_Os01g06790,LOC_Os01g06876,LOC_Os01g06890,LOC_Os01g06900,LOC_Os01g08020,LOC_Os01g08090,LOC_Os01g08780,LOC_Os01g09540,LOC_Os01g10890,LOC_Os01g12210,LOC_Os01g12490,LOC_Os01g13270,LOC_Os01g18110,LOC_Os01g21970,LOC_Os01g27170,LOC_Os01g27260,LOC_Os01g27880,LOC_Os01g36720,LOC_Os01g39860,LOC_Os01g39970,LOC_Os01g…	1828	7318	32072	1.31862	1.43e-09	1.64e-09	2.38e-10	7
GOTERM_MF	GO:0004713	protein tyrosine kinase activity	139	7.60394	6.1e-11	LOC_Os01g04570,LOC_Os01g06280,LOC_Os01g10890,LOC_Os01g13270,LOC_Os01g21970,LOC_Os01g26300,LOC_Os01g39600,LOC_Os01g39970,LOC_Os01g41730,LOC_Os01g44110,LOC_Os01g47470,LOC_Os01g48000,LOC_Os01g50420,LOC_Os01g55440,LOC_Os01g57560,LOC_Os01g57940,LOC_Os01g59360,LOC_Os01g60060,LOC_Os01g60670,LOC_Os01g70410,LOC_Os01g72700,LOC_Os02g02490,LOC_Os02g12660,LOC_Os02g13780,LOC_Os02g26160,LOC_Os02g40200,LOC_Os02g…	1828	1314	32072	1.85596	3.33e-08	3.27e-08	4.76e-09	7
GOTERM_BP	GO:0005975	carbohydrate metabolic process	127	6.94748	7.24e-11	LOC_Os01g01710,LOC_Os01g18400,LOC_Os01g21070,LOC_Os01g27880,LOC_Os01g33300,LOC_Os01g39830,LOC_Os01g46950,LOC_Os01g49320,LOC_Os01g51570,LOC_Os01g52710,LOC_Os01g63270,LOC_Os01g63810,LOC_Os01g64660,LOC_Os01g69030,LOC_Os01g71280,LOC_Os01g71474,LOC_Os02g03550,LOC_Os02g09450,LOC_Os02g10300,LOC_Os02g12730,LOC_Os02g15690,LOC_Os02g31030,LOC_Os02g32660,LOC_Os02g36770,LOC_Os02g38920,LOC_Os02g50040,LOC_Os02g…	1828	1163	32072	1.9159	3.95e-08	3.4e-08	4.94e-09	7
GOTERM_MF	GO:0004672	protein kinase activity	146	7.98687	1.13e-10	LOC_Os01g04570,LOC_Os01g06280,LOC_Os01g10890,LOC_Os01g13270,LOC_Os01g21970,LOC_Os01g26300,LOC_Os01g39600,LOC_Os01g39970,LOC_Os01g41730,LOC_Os01g44110,LOC_Os01g47470,LOC_Os01g48000,LOC_Os01g50420,LOC_Os01g55440,LOC_Os01g57560,LOC_Os01g57940,LOC_Os01g59360,LOC_Os01g60060,LOC_Os01g60670,LOC_Os01g70410,LOC_Os01g72700,LOC_Os02g02490,LOC_Os02g12660,LOC_Os02g13780,LOC_Os02g26160,LOC_Os02g40200,LOC_Os02g…	1828	1419	32072	1.80518	6.15e-08	4.23e-08	6.15e-09	7
GOTERM_MF	GO:0004674	protein serine/threonine kinase activity	143	7.82276	1.73e-10	LOC_Os01g04570,LOC_Os01g06280,LOC_Os01g10890,LOC_Os01g13270,LOC_Os01g21970,LOC_Os01g26300,LOC_Os01g39600,LOC_Os01g39970,LOC_Os01g41730,LOC_Os01g44110,LOC_Os01g47470,LOC_Os01g48000,LOC_Os01g50420,LOC_Os01g55440,LOC_Os01g57560,LOC_Os01g57940,LOC_Os01g59360,LOC_Os01g60060,LOC_Os01g60670,LOC_Os01g70410,LOC_Os01g72700,LOC_Os02g02490,LOC_Os02g12660,LOC_Os02g13780,LOC_Os02g26160,LOC_Os02g40200,LOC_Os02g…	1828	1389	32072	1.80627	9.43e-08	5.9e-08	8.57e-09	7
GOTERM_BP	GO:0006468	protein phosphorylation	147	8.04158	2.57e-10	LOC_Os01g04570,LOC_Os01g06280,LOC_Os01g10890,LOC_Os01g13270,LOC_Os01g21970,LOC_Os01g26300,LOC_Os01g39600,LOC_Os01g39970,LOC_Os01g41730,LOC_Os01g44110,LOC_Os01g47470,LOC_Os01g48000,LOC_Os01g50420,LOC_Os01g55440,LOC_Os01g57560,LOC_Os01g57940,LOC_Os01g59360,LOC_Os01g60060,LOC_Os01g60670,LOC_Os01g70410,LOC_Os01g72700,LOC_Os02g02490,LOC_Os02g12660,LOC_Os02g13780,LOC_Os02g26160,LOC_Os02g40200,LOC_Os02g…	1828	1451	32072	1.77746	1.4e-07	8.05e-08	1.17e-08	7
GOTERM_MF	GO:0016787	hydrolase activity	265	14.4967	4.51e-10	LOC_Os01g04710,LOC_Os01g08780,LOC_Os01g09540,LOC_Os01g11660,LOC_Os01g11670,LOC_Os01g12304,LOC_Os01g14940,LOC_Os01g15130,LOC_Os01g18400,LOC_Os01g21034,LOC_Os01g21070,LOC_Os01g21630,LOC_Os01g22670,LOC_Os01g22680,LOC_Os01g27880,LOC_Os01g33300,LOC_Os01g39830,LOC_Os01g41240,LOC_Os01g42690,LOC_Os01g43140,LOC_Os01g49320,LOC_Os01g50080,LOC_Os01g50810,LOC_Os01g51570,LOC_Os01g52230,LOC_Os01g53630,LOC_Os01g…	1828	3131	32072	1.48495	2.46e-07	1.21e-07	1.76e-08	7
GOTERM_MF	GO:0016491	oxidoreductase activity	142	7.76805	2.47e-09	LOC_Os01g01710,LOC_Os01g03549,LOC_Os01g03640,LOC_Os01g05840,LOC_Os01g06900,LOC_Os01g12740,LOC_Os01g12770,LOC_Os01g25484,LOC_Os01g35230,LOC_Os01g39860,LOC_Os01g43740,LOC_Os01g55240,LOC_Os01g57940,LOC_Os01g58194,LOC_Os01g60080,LOC_Os01g62870,LOC_Os01g63190,LOC_Os01g69080,LOC_Os01g70525,LOC_Os01g70870,LOC_Os01g70930,LOC_Os01g71280,LOC_Os01g71310,LOC_Os02g02400,LOC_Os02g04510,LOC_Os02g09200,LOC_Os02g…	1828	1438	32072	1.73252	1.35e-06	6.2e-07	9.01e-08	7
GOTERM_CC	GO:0005618	cell wall	119	6.50985	2.95e-09	LOC_Os01g03549,LOC_Os01g03640,LOC_Os01g10930,LOC_Os01g18170,LOC_Os01g18400,LOC_Os01g21034,LOC_Os01g39830,LOC_Os01g50810,LOC_Os01g51570,LOC_Os01g53990,LOC_Os01g56320,LOC_Os01g56880,LOC_Os01g58240,LOC_Os01g60770,LOC_Os01g62260,LOC_Os01g64860,LOC_Os01g65790,LOC_Os01g69240,LOC_Os01g71474,LOC_Os02g02400,LOC_Os02g03550,LOC_Os02g07060,LOC_Os02g12730,LOC_Os02g20540,LOC_Os02g42810,LOC_Os02g50820,LOC_Os02g…	1828	1137	32072	1.83627	1.61e-06	6.92e-07	1.01e-07	7
GOTERM_BP	GO:0055114	oxidation-reduction process	148	8.09628	4.11e-09	LOC_Os01g01710,LOC_Os01g03549,LOC_Os01g03640,LOC_Os01g05840,LOC_Os01g09030,LOC_Os01g12490,LOC_Os01g12740,LOC_Os01g12770,LOC_Os01g25484,LOC_Os01g27140,LOC_Os01g35230,LOC_Os01g39860,LOC_Os01g43740,LOC_Os01g55240,LOC_Os01g55795,LOC_Os01g57940,LOC_Os01g58194,LOC_Os01g60080,LOC_Os01g62870,LOC_Os01g63190,LOC_Os01g68480,LOC_Os01g69030,LOC_Os01g69080,LOC_Os01g70525,LOC_Os01g70870,LOC_Os01g70930,LOC_Os01g…	1828	1532	32072	1.69493	2.24e-06	9.07e-07	1.32e-07	7
GOTERM_MF	GO:0016772	transferase activity, transferring phosphorus-containing groups	141	7.71335	7.45e-09	LOC_Os01g04570,LOC_Os01g06280,LOC_Os01g10890,LOC_Os01g13270,LOC_Os01g21970,LOC_Os01g39600,LOC_Os01g39970,LOC_Os01g41730,LOC_Os01g44110,LOC_Os01g47470,LOC_Os01g48000,LOC_Os01g50420,LOC_Os01g55440,LOC_Os01g57560,LOC_Os01g57940,LOC_Os01g59360,LOC_Os01g60060,LOC_Os01g60670,LOC_Os01g70410,LOC_Os01g72700,LOC_Os02g02490,LOC_Os02g12660,LOC_Os02g13780,LOC_Os02g26160,LOC_Os02g40200,LOC_Os02g56370,LOC_Os02g…	1828	1452	32072	1.70374	4.07e-06	1.56e-06	2.26e-07	7
GOTERM_MF	GO:0004553	hydrolase activity, hydrolyzing O-glycosyl compounds	48	2.62582	1.24e-08	LOC_Os01g21070,LOC_Os01g39830,LOC_Os01g49320,LOC_Os01g51570,LOC_Os01g71474,LOC_Os02g03550,LOC_Os02g12730,LOC_Os02g32660,LOC_Os02g50040,LOC_Os02g53820,LOC_Os03g01800,LOC_Os03g10469,LOC_Os03g12620,LOC_Os03g13570,LOC_Os03g44810,LOC_Os03g46660,LOC_Os03g53800,LOC_Os04g40490,LOC_Os04g41970,LOC_Os04g51450,LOC_Os04g53950,LOC_Os05g12150,LOC_Os05g15850,LOC_Os05g23924,LOC_Os05g51750,LOC_Os06g07600,LOC_Os06g…	1828	307	32072	2.74317	6.78e-06	2.46e-06	3.57e-07	7
GOTERM_CC	GO:0048046	apoplast	51	2.78993	1.38e-08	LOC_Os01g18170,LOC_Os01g21034,LOC_Os01g25484,LOC_Os01g39830,LOC_Os01g41710,LOC_Os01g51570,LOC_Os01g52240,LOC_Os01g63190,LOC_Os01g71474,LOC_Os02g02400,LOC_Os02g03550,LOC_Os02g12730,LOC_Os02g54060,LOC_Os03g01800,LOC_Os03g08790,LOC_Os03g13570,LOC_Os03g16900,LOC_Os03g44170,LOC_Os03g58980,LOC_Os04g51450,LOC_Os04g52280,LOC_Os04g53950,LOC_Os04g58710,LOC_Os05g02530,LOC_Os05g38420,LOC_Os06g05550,LOC_Os06g…	1828	340	32072	2.63173	7.53e-06	2.59e-06	3.76e-07	7
GOTERM_MF	GO:0003824	catalytic activity	337	18.4354	2.68e-08	LOC_Os01g01710,LOC_Os01g03549,LOC_Os01g03640,LOC_Os01g05840,LOC_Os01g08220,LOC_Os01g09030,LOC_Os01g09830,LOC_Os01g11660,LOC_Os01g12490,LOC_Os01g12740,LOC_Os01g12770,LOC_Os01g15130,LOC_Os01g18110,LOC_Os01g20910,LOC_Os01g21070,LOC_Os01g21300,LOC_Os01g21310,LOC_Os01g25484,LOC_Os01g26039,LOC_Os01g27140,LOC_Os01g27880,LOC_Os01g36350,LOC_Os01g39830,LOC_Os01g39860,LOC_Os01g41240,LOC_Os01g43140,LOC_Os01g…	1828	4383	32072	1.34899	1.46e-05	4.8e-06	6.98e-07	7
GOTERM_MF	GO:0016301	kinase activity	188	10.2845	3.11e-08	LOC_Os01g04230,LOC_Os01g04570,LOC_Os01g06280,LOC_Os01g06790,LOC_Os01g06876,LOC_Os01g06890,LOC_Os01g06900,LOC_Os01g10890,LOC_Os01g13270,LOC_Os01g21970,LOC_Os01g26300,LOC_Os01g39600,LOC_Os01g39970,LOC_Os01g41730,LOC_Os01g44110,LOC_Os01g47470,LOC_Os01g48000,LOC_Os01g50420,LOC_Os01g55440,LOC_Os01g56764,LOC_Os01g57560,LOC_Os01g57940,LOC_Os01g59360,LOC_Os01g60060,LOC_Os01g60670,LOC_Os01g70410,LOC_Os01g…	1828	2152	32072	1.53273	1.7e-05	5.31e-06	7.71e-07	7
GOTERM_CC	GO:0016021	integral component of membrane	199	10.8862	3.3e-08	LOC_Os01g04640,LOC_Os01g06310,LOC_Os01g08020,LOC_Os01g14520,LOC_Os01g25460,LOC_Os01g27170,LOC_Os01g28840,LOC_Os01g36720,LOC_Os01g41710,LOC_Os01g43460,LOC_Os01g50080,LOC_Os01g50820,LOC_Os01g52130,LOC_Os01g54515,LOC_Os01g57940,LOC_Os01g60060,LOC_Os01g60140,LOC_Os01g60670,LOC_Os01g60770,LOC_Os01g60810,LOC_Os01g61510,LOC_Os01g63240,LOC_Os01g64660,LOC_Os01g65590,LOC_Os01g66010,LOC_Os01g67360,LOC_Os01g…	1828	2313	32072	1.50948	1.8e-05	5.39e-06	7.84e-07	7
GOTERM_MF	GO:0009055	electron carrier activity	93	5.08753	4.78e-08	LOC_Os01g09830,LOC_Os01g12740,LOC_Os01g12770,LOC_Os01g25484,LOC_Os01g27140,LOC_Os01g43740,LOC_Os01g57940,LOC_Os01g68480,LOC_Os01g71310,LOC_Os02g09200,LOC_Os02g09220,LOC_Os02g09240,LOC_Os02g12890,LOC_Os02g13780,LOC_Os02g21810,LOC_Os02g30100,LOC_Os02g30110,LOC_Os02g44654,LOC_Os02g45710,LOC_Os02g49850,LOC_Os02g50770,LOC_Os02g51370,LOC_Os02g52180,LOC_Os02g53130,LOC_Os02g58720,LOC_Os03g02920,LOC_Os03g…	1828	860	32072	1.89729	2.61e-05	7.31e-06	1.06e-06	7
GOTERM_CC	GO:0016020	membrane	436	23.8512	2.34e-07	LOC_Os01g03549,LOC_Os01g03640,LOC_Os01g04640,LOC_Os01g06280,LOC_Os01g06310,LOC_Os01g08020,LOC_Os01g08460,LOC_Os01g09190,LOC_Os01g09540,LOC_Os01g10930,LOC_Os01g12210,LOC_Os01g13390,LOC_Os01g14520,LOC_Os01g24500,LOC_Os01g25484,LOC_Os01g27170,LOC_Os01g27190,LOC_Os01g28840,LOC_Os01g36580,LOC_Os01g36720,LOC_Os01g37590,LOC_Os01g39600,LOC_Os01g41200,LOC_Os01g41710,LOC_Os01g43460,LOC_Os01g46850,LOC_Os01g…	1828	6058	32072	1.26272	0.000127642	3.25e-05	4.73e-06	7
GOTERM_MF	GO:0005215	transporter activity	141	7.71335	5.83e-07	LOC_Os01g08020,LOC_Os01g12210,LOC_Os01g14520,LOC_Os01g27170,LOC_Os01g28840,LOC_Os01g36720,LOC_Os01g37590,LOC_Os01g43460,LOC_Os01g46860,LOC_Os01g50080,LOC_Os01g50820,LOC_Os01g52130,LOC_Os01g54515,LOC_Os01g60140,LOC_Os01g61510,LOC_Os01g65140,LOC_Os01g65500,LOC_Os01g66010,LOC_Os01g68050,LOC_Os01g69070,LOC_Os01g71240,LOC_Os01g74110,LOC_Os01g74450,LOC_Os02g04030,LOC_Os02g06540,LOC_Os02g09150,LOC_Os02g…	1828	1574	32072	1.57168	0.000318381	7.55e-05	1.1e-05	7
GOTERM_BP	GO:0006810	transport	209	11.4333	1.26e-06	LOC_Os01g03490,LOC_Os01g08020,LOC_Os01g09830,LOC_Os01g12210,LOC_Os01g14520,LOC_Os01g25484,LOC_Os01g27170,LOC_Os01g28840,LOC_Os01g36720,LOC_Os01g37590,LOC_Os01g41200,LOC_Os01g43460,LOC_Os01g46860,LOC_Os01g48710,LOC_Os01g50080,LOC_Os01g50820,LOC_Os01g52130,LOC_Os01g54515,LOC_Os01g57940,LOC_Os01g60140,LOC_Os01g61070,LOC_Os01g61510,LOC_Os01g64660,LOC_Os01g65140,LOC_Os01g65500,LOC_Os01g66010,LOC_Os01g…	1828	2596	32072	1.41251	0.000690475	0.000148468	2.16e-05	7
GOTERM_BP	GO:0006950	response to stress	282	15.4267	1.61e-06	LOC_Os01g01160,LOC_Os01g03549,LOC_Os01g03640,LOC_Os01g04330,LOC_Os01g04370,LOC_Os01g04920,LOC_Os01g05650,LOC_Os01g06790,LOC_Os01g06876,LOC_Os01g06890,LOC_Os01g06900,LOC_Os01g09100,LOC_Os01g16400,LOC_Os01g18110,LOC_Os01g18170,LOC_Os01g18400,LOC_Os01g19330,LOC_Os01g21250,LOC_Os01g22680,LOC_Os01g26340,LOC_Os01g33160,LOC_Os01g37590,LOC_Os01g39970,LOC_Os01g42190,LOC_Os01g43590,LOC_Os01g49320,LOC_Os01g…	1828	3723	32072	1.32894	0.000881721	0.000183845	2.67e-05	7
GOTERM_MF	GO:0020037	heme binding	61	3.33698	2.04e-06	LOC_Os01g12740,LOC_Os01g12770,LOC_Os01g25484,LOC_Os01g43740,LOC_Os02g02400,LOC_Os02g09200,LOC_Os02g09220,LOC_Os02g09240,LOC_Os02g12890,LOC_Os02g21810,LOC_Os02g30100,LOC_Os02g30110,LOC_Os02g44654,LOC_Os02g50770,LOC_Os02g53130,LOC_Os02g58720,LOC_Os03g02920,LOC_Os03g03910,LOC_Os03g05770,LOC_Os03g13140,LOC_Os03g30420,LOC_Os03g39650,LOC_Os03g55230,LOC_Os04g01140,LOC_Os04g39430,LOC_Os04g39780,LOC_Os04g…	1828	530	32072	2.01931	0.00111653	0.000225958	3.28e-05	7
GOTERM_BP	GO:0006629	lipid metabolic process	99	5.41575	2.65e-06	LOC_Os01g01710,LOC_Os01g04920,LOC_Os01g11660,LOC_Os01g12304,LOC_Os01g43140,LOC_Os01g50760,LOC_Os01g51610,LOC_Os01g55240,LOC_Os01g63580,LOC_Os01g67540,LOC_Os01g69080,LOC_Os02g09450,LOC_Os02g10760,LOC_Os02g12890,LOC_Os02g17780,LOC_Os02g21810,LOC_Os02g31030,LOC_Os02g37654,LOC_Os02g39155,LOC_Os02g40440,LOC_Os02g40784,LOC_Os02g44654,LOC_Os02g55910,LOC_Os03g02710,LOC_Os03g18010,LOC_Os03g18070,LOC_Os03g…	1828	1033	32072	1.68145	0.00144836	0.000284737	4.14e-05	7
GOTERM_MF	GO:0016798	hydrolase activity, acting on glycosyl bonds	35	1.91466	3.43e-06	LOC_Os01g18400,LOC_Os01g21070,LOC_Os01g33300,LOC_Os01g39830,LOC_Os01g49320,LOC_Os01g51570,LOC_Os01g71474,LOC_Os02g10300,LOC_Os02g12730,LOC_Os02g15690,LOC_Os02g50040,LOC_Os02g53820,LOC_Os03g46660,LOC_Os04g41970,LOC_Os05g12150,LOC_Os05g23924,LOC_Os05g50260,LOC_Os06g08090,LOC_Os06g34020,LOC_Os06g35320,LOC_Os06g39060,LOC_Os06g40890,LOC_Os06g46940,LOC_Os07g14160,LOC_Os07g19040,LOC_Os07g26900,LOC_Os07g…	1828	234	32072	2.62423	0.00187242	0.000354054	5.15e-05	7
GOTERM_BP	GO:0009628	response to abiotic stimulus	177	9.68271	8.35e-06	LOC_Os01g03549,LOC_Os01g03640,LOC_Os01g04330,LOC_Os01g04370,LOC_Os01g18110,LOC_Os01g18170,LOC_Os01g19330,LOC_Os01g21250,LOC_Os01g44390,LOC_Os01g49320,LOC_Os01g50080,LOC_Os01g51570,LOC_Os01g52470,LOC_Os01g53630,LOC_Os01g54210,LOC_Os01g55240,LOC_Os01g60770,LOC_Os01g63270,LOC_Os01g66890,LOC_Os01g68020,LOC_Os01g71280,LOC_Os01g71474,LOC_Os02g02400,LOC_Os02g02560,LOC_Os02g07060,LOC_Os02g09150,LOC_Os02g…	1828	2194	32072	1.41542	0.00456161	0.000825981	0.000120042	7
GOTERM_BP	GO:0009719	response to endogenous stimulus	123	6.72867	8.74e-05	LOC_Os01g04330,LOC_Os01g06280,LOC_Os01g09100,LOC_Os01g10890,LOC_Os01g19330,LOC_Os01g22680,LOC_Os01g37590,LOC_Os01g45090,LOC_Os01g50080,LOC_Os01g51610,LOC_Os01g52660,LOC_Os01g55440,LOC_Os01g55940,LOC_Os01g58420,LOC_Os01g60770,LOC_Os01g64660,LOC_Os01g66890,LOC_Os01g68020,LOC_Os01g69080,LOC_Os01g70870,LOC_Os02g02400,LOC_Os02g10760,LOC_Os02g13520,LOC_Os02g17780,LOC_Os02g36890,LOC_Os02g40710,LOC_Os02g…	1828	1486	32072	1.45223	0.0477356	0.00746492	0.0010849	7
GOTERM_MF	GO:0019825	oxygen binding	40	2.18818	0.000167119	LOC_Os01g12740,LOC_Os01g12770,LOC_Os01g36350,LOC_Os01g43740,LOC_Os01g59050,LOC_Os02g09200,LOC_Os02g09220,LOC_Os02g09240,LOC_Os02g12890,LOC_Os02g21810,LOC_Os02g30100,LOC_Os02g30110,LOC_Os02g44654,LOC_Os03g13140,LOC_Os03g30420,LOC_Os03g39650,LOC_Os03g55230,LOC_Os04g01140,LOC_Os04g39430,LOC_Os04g40460,LOC_Os04g47250,LOC_Os06g01250,LOC_Os06g02019,LOC_Os06g36920,LOC_Os06g41070,LOC_Os06g43510,LOC_Os06g…	1828	351	32072	1.99941	0.0912468	0.0136488	0.00198363	7
GOTERM_MF	GO:0043169	cation binding	26	1.42232	0.000239501	LOC_Os01g39830,LOC_Os01g51570,LOC_Os01g71474,LOC_Os02g12730,LOC_Os02g32660,LOC_Os03g10469,LOC_Os03g12620,LOC_Os03g46660,LOC_Os04g40490,LOC_Os05g15850,LOC_Os05g23924,LOC_Os06g34020,LOC_Os06g39060,LOC_Os06g46940,LOC_Os07g01770,LOC_Os07g19040,LOC_Os07g35480,LOC_Os07g38790,LOC_Os07g43390,LOC_Os08g43570,LOC_Os09g29404,LOC_Os09g33710,LOC_Os10g22520,LOC_Os10g32810,LOC_Os11g27400,LOC_Os11g47600	1828	189	32072	2.41358	0.130768	0.0191443	0.00278229	7
GOTERM_BP	GO:0016310	phosphorylation	99	5.41575	0.000250423	LOC_Os01g04570,LOC_Os01g06280,LOC_Os01g10890,LOC_Os01g21970,LOC_Os01g39970,LOC_Os01g41730,LOC_Os01g47470,LOC_Os01g48000,LOC_Os01g55440,LOC_Os01g56764,LOC_Os01g57560,LOC_Os01g59360,LOC_Os01g60670,LOC_Os01g70410,LOC_Os02g12660,LOC_Os02g26160,LOC_Os02g56370,LOC_Os02g57440,LOC_Os02g58390,LOC_Os03g03280,LOC_Os03g03570,LOC_Os03g12520,LOC_Os03g12680,LOC_Os03g13080,LOC_Os03g14710,LOC_Os03g18170,LOC_Os03g…	1828	1174	32072	1.47951	0.136731	0.0196002	0.00284856	7
GOTERM_MF	GO:0005488	binding	294	16.0832	0.000824379	LOC_Os01g01710,LOC_Os01g03490,LOC_Os01g03549,LOC_Os01g03640,LOC_Os01g03840,LOC_Os01g04330,LOC_Os01g05650,LOC_Os01g05840,LOC_Os01g08220,LOC_Os01g11460,LOC_Os01g12490,LOC_Os01g12740,LOC_Os01g12770,LOC_Os01g18110,LOC_Os01g18170,LOC_Os01g20910,LOC_Os01g27880,LOC_Os01g36350,LOC_Os01g41200,LOC_Os01g41710,LOC_Os01g43740,LOC_Os01g48710,LOC_Os01g49280,LOC_Os01g49320,LOC_Os01g52240,LOC_Os01g52470,LOC_Os01g…	1828	4287	32072	1.20322	0.450111	0.0553054	0.0080377	7
GOTERM_MF	GO:0004497	monooxygenase activity	39	2.13348	0.000998269	LOC_Os01g12490,LOC_Os01g12740,LOC_Os01g12770,LOC_Os01g43740,LOC_Os02g09200,LOC_Os02g09220,LOC_Os02g09240,LOC_Os02g12890,LOC_Os02g21810,LOC_Os02g30100,LOC_Os02g30110,LOC_Os02g44654,LOC_Os03g05900,LOC_Os03g30420,LOC_Os03g39650,LOC_Os03g55230,LOC_Os04g01140,LOC_Os04g34580,LOC_Os04g37619,LOC_Os04g39430,LOC_Os04g47250,LOC_Os06g01250,LOC_Os06g02019,LOC_Os06g36920,LOC_Os06g41070,LOC_Os06g43510,LOC_Os06g…	1828	375	32072	1.82467	0.545055	0.0657962	0.00956236	7
GOTERM_MF	GO:0016705	oxidoreductase activity, acting on paired donors, with incorporation or reduction of molecular oxygen	35	1.91466	0.00174147	LOC_Os01g12740,LOC_Os01g12770,LOC_Os01g43740,LOC_Os01g55795,LOC_Os02g09200,LOC_Os02g09220,LOC_Os02g09240,LOC_Os02g12890,LOC_Os02g21810,LOC_Os02g30100,LOC_Os02g30110,LOC_Os02g44654,LOC_Os03g30420,LOC_Os03g39650,LOC_Os03g55230,LOC_Os04g01140,LOC_Os04g39430,LOC_Os04g47250,LOC_Os06g01250,LOC_Os06g02019,LOC_Os06g36920,LOC_Os06g41070,LOC_Os06g43510,LOC_Os06g46680,LOC_Os07g33620,LOC_Os07g48330,LOC_Os08g…	1828	335	32072	1.83304	0.950845	0.100654	0.0146284	7
GOTERM_BP	GO:0080167	response to karrikin	18	0.984683	0.00265946	LOC_Os01g03549,LOC_Os01g03640,LOC_Os01g49720,LOC_Os02g40710,LOC_Os03g18070,LOC_Os03g37411,LOC_Os03g37470,LOC_Os03g39000,LOC_Os06g04070,LOC_Os06g04250,LOC_Os06g07600,LOC_Os06g41700,LOC_Os07g10840,LOC_Os10g08022,LOC_Os10g38580,LOC_Os10g38610,LOC_Os10g38740,LOC_Os12g42020	1828	131	32072	2.41074	1	0.143313	0.0208282	7
GOTERM_MF	GO:0046872	metal ion binding	163	8.91685	0.00270842	LOC_Os01g01710,LOC_Os01g03490,LOC_Os01g03640,LOC_Os01g03840,LOC_Os01g04330,LOC_Os01g05650,LOC_Os01g09830,LOC_Os01g11460,LOC_Os01g12740,LOC_Os01g12770,LOC_Os01g18170,LOC_Os01g20910,LOC_Os01g25484,LOC_Os01g41200,LOC_Os01g41710,LOC_Os01g43740,LOC_Os01g48710,LOC_Os01g52240,LOC_Os01g56880,LOC_Os01g57940,LOC_Os01g61070,LOC_Os01g63190,LOC_Os01g64620,LOC_Os01g64660,LOC_Os01g69080,LOC_Os01g70100,LOC_Os01g…	1828	2266	32072	1.26205	1	0.143313	0.0208282	7

## Sheet: S4
Table S4 Gene list from region 7 having the GO term related to the cell wall.
GO:0042545 cell wall modification
	#pacId	transcriptName	peptideName	Pfam	Panther	KOG	KEGG/ec	KO	GO	Best-hit-arabi-name	arabi-symbol	arabi-defline	name	transcript_id	defLine	def_def	salinity (Mock_root)	salinity (Mock_shoot)	salinity (Ri_root)	salinity (Ri_shoot)	Ri (control_root)	Ri (salinity_root)	Ri (control_shoot)	Ri (salinity_shoot)	root (Mock_control)	root (Mock_salinity)	root (Ri_control)	root (Ri_salinity)	M.0.r.1	M.0.r.2	M.0.r.3	M.0.s.1	M.0.s.2	M.0.s.3	M.150.r.1	M.150.r.2	M.150.s.1	M.150.s.2	M.150.s.3	R.0.r.1	R.0.r.3	R.0.s.1	R.0.s.2	R.0.s.3	Ri.150.r.1	Ri.150.r.2	Ri.150.r.3	Ri.150.s.1	Ri.150.s.2
LOC_Os01g21034.MSUv7.0	33121293	LOC_Os01g21034.1	LOC_Os01g21034.1	PF04043,PF01095	PTHR31707,PTHR31707:SF25		3.1.1.11	K01051	GO:0004857,GO:0042545,GO:0030599,GO:0005618	AT3G14310.1	ATPME3,PME3	pectin methylesterase 3	LOC_Os01g21034.MSUv7.0	LOC_Os01g21034.1	defLine	pectinesterase, putative, expressed	-0.799465	2.03785	0.347546	0.0256977	-1.0561	0.0909102	2.17853	0.166375	-3.26735	-6.10466	-6.50198	-6.18013	38	5	9	283	70	286	11	0	893	659	620	9	4	698	887	1106	2	6	8	517	878
LOC_Os01g53990.MSUv7.0	33119619	LOC_Os01g53990.1	LOC_Os01g53990.1	PF01095	PTHR31321,PTHR31321:SF21		3.1.1.11	K01051	GO:0042545,GO:0030599,GO:0005618	AT5G19730.1		Pectin lyase-like superfamily protein	LOC_Os01g53990.MSUv7.0	LOC_Os01g53990.1	defLine	pectinesterase, putative, expressed	-0.543587	2.16084	-0.737092	0.448702	-0.465359	-0.658863	2.36516	0.653023	3.14412	0.439697	0.313605	-0.872189	55	42	51	11	4	6	20	18	31	22	27	24	34	12	44	47	5	9	20	30	22
LOC_Os01g62260.MSUv7.0	33124842	LOC_Os01g62260.1	LOC_Os01g62260.1	PF00314	PTHR31048,PTHR31048:SF7					AT2G28790.1		Pathogenesis-related thaumatin superfamily protein	LOC_Os01g62260.MSUv7.0	LOC_Os01g62260.1	defLine	thaumatin, putative, expressed	0.0186283	2.63992	-0.379352	0.563783	-0.134702	-0.532682	2.07641	0.000270732	-0.855764	-3.47706	-3.06688	-4.01001	235	97	152	323	335	476	117	65	1730	1906	2174	145	86	519	1085	2903	52	44	74	1889	1679
LOC_Os01g65790.MSUv7.0	33124222	LOC_Os01g65790.1	LOC_Os01g65790.1	PF01095	PTHR31707,PTHR31707:SF2		3.1.1.11		GO:0042545,GO:0030599,GO:0005618	AT5G09760.1		Plant invertase/pectin methylesterase inhibitor superfamily	LOC_Os01g65790.MSUv7.0	LOC_Os01g65790.1	defLine	pectinesterase, putative, expressed	0.139914	1.49331	0.816353	0.444232	-0.886422	-0.209983	1.30259	0.253504	0.226812	-1.12659	-1.9622	-1.59008	163	125	181	182	145	192	116	78	342	462	426	53	84	242	415	531	76	59	90	481	484
LOC_Os03g18860.MSUv7.0	33133515	LOC_Os03g18860.1	LOC_Os03g18860.1	PF04043,PF01095	PTHR31707,PTHR31707:SF57		3.1.1.11	K01051	GO:0004857,GO:0042545,GO:0030599,GO:0005618	AT3G05610.1		Plant invertase/pectin methylesterase inhibitor superfamily	LOC_Os03g18860.MSUv7.0	LOC_Os03g18860.1	defLine	pectinesterase, putative, expressed	-1.85358	-5.43854	0	1.67912	-1.85358	0	-8.83348	-1.71581	-6.9799	-3.39494	0	-1.67912	1	0	0	176	28	0	0	0	0	2	2	0	0	0	0	0	0	0	0	0	1
LOC_Os03g19610.MSUv7.0	33127422	LOC_Os03g19610.1	LOC_Os03g19610.1	PF01095	PTHR31321		3.1.1.11		GO:0042545,GO:0030599,GO:0005618	AT3G17060.1		Pectin lyase-like superfamily protein	LOC_Os03g19610.MSUv7.0	LOC_Os03g19610.1	defLine	pectinesterase, putative, expressed	0.376543	-10.5325	0	-0.0140343	-2.6358	-3.01234	-8.85188	1.66654	-7.89665	3.01234	-1.68057	-1.66654	0	0	2	585	72	3	0	1	0	0	0	0	0	0	1	0	0	0	0	1	0
LOC_Os04g38560.MSUv7.0	33111108	LOC_Os04g38560.1	LOC_Os04g38560.1	PF04043,PF01095	PTHR31707,PTHR31707:SF9		3.1.1.11		GO:0004857,GO:0042545,GO:0030599,GO:0005618	AT5G27870.1		Plant invertase/pectin methylesterase inhibitor superfamily	LOC_Os04g38560.MSUv7.0	LOC_Os04g38560.1	defLine	pectinesterase, putative, expressed	3.01894	-10.3695	-3.4297	4.04558	-0.401477	-6.85011	-12.1276	2.28749	-8.29644	5.09202	3.4297	-4.04558	0	2	3	1815	170	1	3	13	0	1	0	1	1	0	0	0	0	0	0	0	6
LOC_Os04g46740.MSUv7.0	33109064	LOC_Os04g46740.1	LOC_Os04g46740.1	PF01095	PTHR31321,PTHR31321:SF19		3.1.1.11		GO:0042545,GO:0030599,GO:0005618	AT5G47500.1		Pectin lyase-like superfamily protein	LOC_Os04g46740.MSUv7.0	LOC_Os04g46740.1	defLine	pectinesterase, putative, expressed	-0.43511	3.58057	0.150486	0.177256	-0.237315	0.348281	3.05954	-0.343775	-1.074	-5.08968	-4.37085	-4.39762	39	21	42	52	63	173	18	10	1254	926	565	22	24	125	573	1503	17	13	18	655	383
LOC_Os06g09340.MSUv7.0	33147854	LOC_Os06g09340.1	LOC_Os06g09340.1	PF04043,PF01095	PTHR31707,PTHR31707:SF39		3.1.1.11		GO:0004857,GO:0042545,GO:0030599,GO:0005618	AT2G26440.1		Plant invertase/pectin methylesterase inhibitor superfamily	LOC_Os06g09340.MSUv7.0	LOC_Os06g09340.1	defLine	pectinesterase, putative, expressed	0.115594	1.93465	0.206942	0.0472434	0.239092	0.330441	1.89581	0.00839715	-2.56129	-4.38034	-4.218	-4.0583	9	12	5	47	28	141	11	0	222	239	201	7	10	214	289	197	9	6	3	179	252
LOC_Os06g48200.MSUv7.0	33146712	LOC_Os06g48200.1	LOC_Os06g48200.1	PF06955,PF00722	PTHR31062,PTHR31062:SF20		2.4.1.207,3.2.1.151	K08235	GO:0048046,GO:0016762,GO:0006073,GO:0005618,GO:0005975,GO:0004553	AT5G57550.1	XTH25,XTR3	xyloglucan endotransglucosylase/hydrolase 25	LOC_Os06g48200.MSUv7.0	LOC_Os06g48200.1	defLine	glycosyl hydrolases family 16, putative, expressed	-1.42713	0.988165	-1.30536	-0.472006	-1.36858	-1.24681	0.995467	-0.464704	-3.15113	-5.56643	-5.51518	-6.34854	293	185	237	2880	2648	2642	35	63	2943	4732	5987	60	89	5565	4260	5409	15	17	25	2771	4769
LOC_Os07g47830.MSUv7.0	33114060	LOC_Os07g47830.1	LOC_Os07g47830.1	PF04043,PF01095	PTHR31707,PTHR31707:SF14		3.1.1.11	K01051	GO:0004857,GO:0042545,GO:0030599,GO:0005618	AT3G14310.1	ATPME3,PME3	pectin methylesterase 3	LOC_Os07g47830.MSUv7.0	LOC_Os07g47830.1	defLine	pectinesterase, putative, expressed	-0.208736	1.99732	1.13575	0.367181	-0.82111	0.523372	2.31963	0.689497	-0.932527	-3.13858	-4.07327	-3.30471	28.146	7.912	8.111	41.627	15.675	51.728	9.033	5.098	101.542	188.854	84.014	9.608	3.406	250.838	153.238	92.126	8.546	8.076	10.926	146.373	235.648
LOC_Os08g34910.MSUv7.0	33104836	LOC_Os08g34910.1	LOC_Os08g34910.1	PF04043,PF01095	PTHR31707,PTHR31707:SF37		3.1.1.11		GO:0004857,GO:0042545,GO:0030599,GO:0005618	AT2G26450.1		Plant invertase/pectin methylesterase inhibitor superfamily	LOC_Os08g34910.MSUv7.0	LOC_Os08g34910.1	defLine	pectinesterase, putative, expressed	1.44962	-4.60189	0.0715829	-0.0620578	-2.55157	-3.92961	-3.75309	0.786744	-6.83523	-0.783713	-5.63371	-5.50007	3	1	9	1432.35	292.379	56.812	0	13	9.771	41.545	18.577	1	0	39.605	64.748	25.159	1	0	0	42.817	48.555
LOC_Os09g26360.MSUv7.0	33144013	LOC_Os09g26360.1	LOC_Os09g26360.1	PF04043,PF01095	PTHR31707,PTHR31707:SF37		3.1.1.11		GO:0004857,GO:0042545,GO:0030599,GO:0005618	AT2G26450.1		Plant invertase/pectin methylesterase inhibitor superfamily	LOC_Os09g26360.MSUv7.0	LOC_Os09g26360.1	defLine	pectinesterase, putative, expressed	3.92466	-8.9176	0	-0.243632	0	-3.92466	-5.04015	3.63382	-10.6916	2.15063	-5.65149	-5.40786	0	0	0	666	53	18	0	2	0	0	1	0	0	8	11	3	0	0	0	8	6
LOC_Os11g45720.MSUv7.0	33164318	LOC_Os11g45720.1	LOC_Os11g45720.1	PF01095	PTHR31321,PTHR31321:SF27		3.1.1.11		GO:0042545,GO:0030599,GO:0005618	AT5G19730.1		Pectin lyase-like superfamily protein	LOC_Os11g45720.MSUv7.0	LOC_Os11g45720.1	defLine	pectinesterase, putative, expressed	5.45067	-10.8241	0	0	0	-5.45067	-12.5969	-1.77282	-12.5969	3.67785	0	0	0	0	0	2560	183	0	0	6	1	0	0	0	0	0	0	0	0	0	0	0	0
LOC_Os11g45730.MSUv7.0	33162475	LOC_Os11g45730.1	LOC_Os11g45730.1	PF01095	PTHR31321,PTHR31321:SF27		3.1.1.11		GO:0042545,GO:0030599,GO:0005618	AT5G19730.1		Pectin lyase-like superfamily protein	LOC_Os11g45730.MSUv7.0	LOC_Os11g45730.1	defLine	pectinesterase, putative, expressed	2.87226	-5.62275	-2.56161	1.62182	-0.594084	-6.02795	-7.60402	-0.359446	-8.81073	-0.315731	-1.8008	-5.98423	1	1	1	1573	204	6	1	8	10	10	13	1	0	6	1	2	0	0	0	17	2
GO:0006073 cellular glucan metabolic process
	#pacId	transcriptName	peptideName	Pfam	Panther	KOG	KEGG/ec	KO	GO	Best-hit-arabi-name	arabi-symbol	arabi-defline	name	transcript_id	defLine	def_def	salinity (Mock_root)	salinity (Mock_shoot)	salinity (Ri_root)	salinity (Ri_shoot)	Ri (control_root)	Ri (salinity_root)	Ri (control_shoot)	Ri (salinity_shoot)	root (Mock_control)	root (Mock_salinity)	root (Ri_control)	root (Ri_salinity)	M.0.r.1	M.0.r.2	M.0.r.3	M.0.s.1	M.0.s.2	M.0.s.3	M.150.r.1	M.150.r.2	M.150.s.1	M.150.s.2	M.150.s.3	R.0.r.1	R.0.r.3	R.0.s.1	R.0.s.2	R.0.s.3	Ri.150.r.1	Ri.150.r.2	Ri.150.r.3	Ri.150.s.1	Ri.150.s.2
LOC_Os02g03550.MSUv7.0	33136075	LOC_Os02g03550.1	LOC_Os02g03550.1	PF06955,PF00722	PTHR31062,PTHR31062:SF35		2.4.1.207	K08235	GO:0048046,GO:0016762,GO:0006073,GO:0005618,GO:0005975,GO:0004553	AT1G32170.1	XTH30,XTR4	xyloglucan endotransglucosylase/hydrolase 30	LOC_Os02g03550.MSUv7.0	LOC_Os02g03550.1	defLine	glycosyl hydrolases family 16, putative, expressed	1.31044	-2.98804	2.31374	0.664892	-2.09978	-1.09648	-4.03909	-0.386159	-3.9937	0.304782	-2.05439	-0.405541	5	5	7	216	56	70	8	8	8	15	15	0	2	7	5	8	3	5	2	13	7
LOC_Os03g01800.MSUv7.0	33129402	LOC_Os03g01800.1	LOC_Os03g01800.1	PF06955,PF00722	PTHR31062,PTHR31062:SF22		2.4.1.207,3.2.1.151		GO:0048046,GO:0016762,GO:0006073,GO:0005618,GO:0005975,GO:0004553	AT2G36870.1	XTH32	xyloglucan endotransglucosylase/hydrolase 32	LOC_Os03g01800.MSUv7.0	LOC_Os03g01800.1	defLine	glycosyl hydrolases family 16, putative, expressed	1.14806	2.64375	0	-0.220939	-1.85944	-3.00751	3.50416	0.639469	-7.76943	-9.26512	-13.133	-12.9121	0	0	1	57	30	331	0	1	752	866	449	0	0	2158	1078	852	0	0	0	543	1388
LOC_Os03g13570.MSUv7.0	33128804	LOC_Os03g13570.1	LOC_Os03g13570.1	PF06955,PF00722	PTHR31062,PTHR31062:SF44			K08235	GO:0048046,GO:0016762,GO:0006073,GO:0005618,GO:0005975,GO:0004553	AT2G01850.1	ATXTH27,EXGT-A3,XTH27	endoxyloglucan transferase A3	LOC_Os03g13570.MSUv7.0	LOC_Os03g13570.1	defLine	glycosyl hydrolases family 16, putative, expressed	-5.2651	1.88537	-1.81211	0.293626	0.048456	3.50145	2.05629	0.464547	-4.03858	-11.1891	-6.04642	-8.15215	3	7	4	129	42	141	0	0	315	349	301	1	7	256	435	508	1	0	1	369	360
LOC_Os04g51450.MSUv7.0	33109152	LOC_Os04g51450.1	LOC_Os04g51450.1	PF06955,PF00722	PTHR31062,PTHR31062:SF36		2.4.1.207		GO:0048046,GO:0016762,GO:0006073,GO:0005618,GO:0005975,GO:0004553	AT5G57550.1	XTH25,XTR3	xyloglucan endotransglucosylase/hydrolase 25	LOC_Os04g51450.MSUv7.0	LOC_Os04g51450.1	defLine	glycosyl hydrolases family 16, putative, expressed	-0.238381	-2.01493	-0.60423	-0.354232	0.509979	0.144131	-1.5332	0.127499	-0.74429	1.03226	1.29889	1.04889	44	37	34	42	102	117	22	15	10	23	20	44	45	27	34	18	12	24	20	18	19
LOC_Os04g53950.MSUv7.0	33111157	LOC_Os04g53950.1	LOC_Os04g53950.1	PF00722	PTHR31062,PTHR31062:SF11		2.4.1.207		GO:0005975,GO:0004553	AT4G03210.1	XTH9	xyloglucan endotransglucosylase/hydrolase 9	LOC_Os04g53950.MSUv7.0	LOC_Os04g53950.1	defLine	glycosyl hydrolases family 16 protein, protein, expressed	-1.39055	2.27418	-1.95085	-0.19273	0.0180113	-0.542294	2.18008	-0.286833	-3.33628	-7.00101	-5.49835	-7.25647	37	21	34	381	293	545.001	9	4	1513	2240	1219	20	30	486	1361	3346	5	4	3	1536	901
LOC_Os06g48200.MSUv7.0	33146712	LOC_Os06g48200.1	LOC_Os06g48200.1	PF06955,PF00722	PTHR31062,PTHR31062:SF20		2.4.1.207,3.2.1.151	K08235	GO:0048046,GO:0016762,GO:0006073,GO:0005618,GO:0005975,GO:0004553	AT5G57550.1	XTH25,XTR3	xyloglucan endotransglucosylase/hydrolase 25	LOC_Os06g48200.MSUv7.0	LOC_Os06g48200.1	defLine	glycosyl hydrolases family 16, putative, expressed	-1.42713	0.988165	-1.30536	-0.472006	-1.36858	-1.24681	0.995467	-0.464704	-3.15113	-5.56643	-5.51518	-6.34854	293	185	237	2880	2648	2642	35	63	2943	4732	5987	60	89	5565	4260	5409	15	17	25	2771	4769
LOC_Os07g29750.MSUv7.0	33116133	LOC_Os07g29750.1	LOC_Os07g29750.1	PF06955,PF00722	PTHR31062,PTHR31062:SF18		2.4.1.207	K08235	GO:0048046,GO:0016762,GO:0006073,GO:0005618,GO:0005975,GO:0004553	AT2G36870.1	XTH32	xyloglucan endotransglucosylase/hydrolase 32	LOC_Os07g29750.MSUv7.0	LOC_Os07g29750.1	defLine	glycosyl hydrolases family 16, putative, expressed	-1.14867	2.12274	-0.91285	0.666215	0.363197	0.599019	1.95557	0.499051	-0.266697	-3.5381	-1.85907	-3.43814	113	36	44	102	61	136	19	13	311	258	488	92	37	289	375	396	21	14	31	294	571
LOC_Os09g23220.MSUv7.0	33142770	LOC_Os09g23220.1	LOC_Os09g23220.1	PF06955,PF00722	PTHR31062,PTHR31062:SF29		2.4.1.207	K08235	GO:0048046,GO:0016762,GO:0006073,GO:0005618,GO:0005975,GO:0004553	AT1G14720.1	ATXTH28,EXGT-A2,XTH28,XTR2	xyloglucan endotransglucosylase/hydrolase 28	LOC_Os09g23220.MSUv7.0	LOC_Os09g23220.1	defLine	glycosyl hydrolases family 16, putative, expressed	-0.747555	3.11232	0.0356586	-0.184304	-0.190322	0.592892	2.71237	-0.584259	1.44401	-2.41587	-1.45868	-1.23872	46	30	26	13	18	18	16	7	132	206	31	27	21	25	49	238	14	12	21	122	43
LOC_Os10g02770.MSUv7.0	33101660	LOC_Os10g02770.1	LOC_Os10g02770.1	PF06955,PF00722	PTHR31062,PTHR31062:SF51		2.4.1.207	K08235	GO:0048046,GO:0016762,GO:0006073,GO:0005618,GO:0005975,GO:0004553	AT1G14720.1	ATXTH28,EXGT-A2,XTH28,XTR2	xyloglucan endotransglucosylase/hydrolase 28	LOC_Os10g02770.MSUv7.0	LOC_Os10g02770.1	defLine	glycosyl hydrolases family 16, putative, expressed	-0.371992	2.04117	-0.624063	-0.311859	-0.104756	-0.356828	1.75308	-0.599941	-1.85987	-4.27302	-3.71771	-4.02991	32	39	67	265	150	232	23	17	831	1070	395	35	34	174	413	1538	12	21	9	603	302
GO:0009250 glucan biosynthetic process
	#pacId	transcriptName	peptideName	Pfam	Panther	KOG	KEGG/ec	KO	GO	Best-hit-arabi-name	arabi-symbol	arabi-defline	name	transcript_id	defLine	def_def	def_whole	annot_def	annot_GO	salinity (Mock_root)	salinity (Mock_shoot)	salinity (Ri_root)	salinity (Ri_shoot)	Ri (control_root)	Ri (salinity_root)	Ri (control_shoot)	Ri (salinity_shoot)	root (Mock_control)	root (Mock_salinity)	root (Ri_control)	root (Ri_salinity)	M.0.r.1	M.0.r.2	M.0.r.3	M.0.s.1	M.0.s.2	M.0.s.3	M.150.r.1	M.150.r.2	M.150.s.1	M.150.s.2	M.150.s.3	R.0.r.1	R.0.r.3	R.0.s.1	R.0.s.2	R.0.s.3	Ri.150.r.1	Ri.150.r.2
soluble starch synthase 3, chloroplast precursor, putative, expressedLOC_Os04g53310.MSUv7.0	33110493	LOC_Os04g53310.1	LOC_Os04g53310.1	PF00534,PF13579,PF16760	PTHR12526,PTHR12526:SF341		2.4.1.21			AT1G11720.2	ATSS3,SS3	starch synthase 3	LOC_Os04g53310.MSUv7.0	LOC_Os04g53310.1	defLine	soluble starch synthase 3, chloroplast precursor, putative, expressed	soluble starch synthase 3, chloroplast precursor, putative, expressed	starch synthase 3		-1.61484	-1.69556	0.806574	0.462442	-1.18768	1.23373	-1.88601	0.271991	-1.36315	-1.28243	-0.66482	-0.320688	1103	947.64	949	3996.61	2953.83	3022.84	210	161	792.039	1533.21	404.334	359	355	875	703	972	294.624	266
starch synthase, putative, expressedLOC_Os02g51070.MSUv7.0	33137121	LOC_Os02g51070.1	LOC_Os02g51070.1	PF00534,PF08323	PTHR12526,PTHR12526:SF371		2.4.1.21	K00703		AT3G01180.1	AtSS2,SS2	starch synthase 2	LOC_Os02g51070.MSUv7.0	LOC_Os02g51070.1	defLine	starch synthase, putative, expressed	starch synthase, putative, expressed	starch synthase 2		0.638741	-1.52942	0.983062	-0.097536	-0.448294	-0.103972	-1.01265	0.419237	-3.79294	-1.62478	-3.22858	-2.14798	173	87	111	2240	2316	2030	122	93	635	811	498	100	43	1162	1010	843	63	79
starch synthase, putative, expressedLOC_Os06g04200.MSUv7.0	33148494	LOC_Os06g04200.1	LOC_Os06g04200.1	PF00534,PF08323	PTHR12526,PTHR12526:SF383		2.4.1.242	K13679		AT1G32900.1		UDP-Glycosyltransferase superfamily protein	LOC_Os06g04200.MSUv7.0	LOC_Os06g04200.1	defLine	starch synthase, putative, expressed	gene_id	locusName	locusName	0	-5.03665	0	0.756536	0	0	-4.44932	1.34387	-10.7147	-5.67808	-6.26541	-7.02195	0	0	0	433	329	17	0	0	6	9	6	0	0	8	17	9	0	0
																	LOC_Os06g04200 starch synthase, putative, expressed	LOC_Os06g04200 UDP-Glycosyltransferase superfamily protein	LOC_Os06g04200 NaN
																	LOC_Os06g04200 starch synthase, putative, expressed	LOC_Os06g04200 UDP-Glycosyltransferase superfamily protein	LOC_Os06g04200 NaN
																	LOC_Os06g04200 starch synthase, putative, expressed	LOC_Os06g04200 UDP-Glycosyltransferase superfamily protein	LOC_Os06g04200 NaN
																	LOC_Os06g04200 starch synthase, putative, expressed	LOC_Os06g04200 UDP-Glycosyltransferase superfamily protein	LOC_Os06g04200 NaN
																	Name: 2, dtype: object	Name: arabi-defline, dtype: object	Name: GO, dtype: object
starch synthase, putative, expressedLOC_Os06g06560.MSUv7.0	33146652	LOC_Os06g06560.1	LOC_Os06g06560.1	PF00534,PF08323	PTHR12526,PTHR12526:SF337		2.4.1.21	K00703		AT5G24300.1	ATSS1,SSI,SSI1	Glycogen/starch synthases, ADP-glucose type	LOC_Os06g06560.MSUv7.0	LOC_Os06g06560.1	defLine	starch synthase, putative, expressed	starch synthase, putative, expressed	Glycogen/starch synthases, ADP-glucose type		-1.8052	-1.47041	0.672029	0.0798251	-1.27542	1.20181	-1.37314	0.177089	-1.32069	-1.65549	-1.22296	-0.630761	1407	1080	915	3948	3450	3688	184	183	845	1980	698	364	400	1098	1061	1882	251	322
starch synthase, putative, expressedLOC_Os07g22930.MSUv7.0	33116920	LOC_Os07g22930.2	LOC_Os07g22930.2	PF00534,PF08323	PTHR12526,PTHR12526:SF346		2.4.1.242	K13679		AT1G32900.1		UDP-Glycosyltransferase superfamily protein	LOC_Os07g22930.MSUv7.0	LOC_Os07g22930.2	defLine	starch synthase, putative, expressed	gene_id	locusName	locusName	-4.20717	-3.40245	1.87225	0.118923	-4.4726	1.60682	-3.25739	0.263982	-1.99876	-2.80348	-3.21397	-1.46064	3125	4892	4045	23834	22190	17692	146	107	1294	3789	421	112	192	1427	1666	3276	131	98
																	LOC_Os07g22930 starch synthase, putative, expressed	LOC_Os07g22930 UDP-Glycosyltransferase superfamily protein	LOC_Os07g22930 NaN
																	LOC_Os07g22930 starch synthase, putative, expressed	LOC_Os07g22930 UDP-Glycosyltransferase superfamily protein	LOC_Os07g22930 NaN
																	LOC_Os07g22930 starch synthase, putative, expressed	LOC_Os07g22930 UDP-Glycosyltransferase superfamily protein	LOC_Os07g22930 NaN
																	Name: 2, dtype: object	Name: arabi-defline, dtype: object	Name: GO, dtype: object
[truncated: 5 more columns]

## Sheet: S5
Table S5 Gene list from region 7 having the GO term related to ester and oxidoreductase activity
GO:0052689 carboxylic ester hydrolase activity
	#pacId	transcriptName	peptideName	Pfam	Panther	KOG	KEGG/ec	KO	GO	Best-hit-arabi-name	arabi-symbol	arabi-defline	name	transcript_id	defLine	def_def	def_whole	annot_def	annot_GO	salinity (Mock_root)	salinity (Mock_shoot)	salinity (Ri_root)	salinity (Ri_shoot)	Ri (control_root)	Ri (salinity_root)	Ri (control_shoot)	Ri (salinity_shoot)	root (Mock_control)	root (Mock_salinity)	root (Ri_control)	root (Ri_salinity)	M.0.r.1	M.0.r.2	M.0.r.3	M.0.s.1	M.0.s.2	M.0.s.3	M.150.r.1	M.150.r.2	M.150.s.1	M.150.s.2	M.150.s.3	R.0.r.1	R.0.r.3	R.0.s.1	R.0.s.2	R.0.s.3	Ri.150.r.1	Ri.150.r.2
GDSL-like lipase/acylhydrolase, putative, expressedLOC_Os03g19670.MSUv7.0	33131268	LOC_Os03g19670.1	LOC_Os03g19670.1	PF00657	PTHR22835,PTHR22835:SF153		3.1.1.3		GO:0016788	AT3G50400.1		GDSL-like Lipase/Acylhydrolase superfamily protein	LOC_Os03g19670.MSUv7.0	LOC_Os03g19670.1	defLine	GDSL-like lipase/acylhydrolase, putative, expressed	gene_id	locusName	locusName	-1.37907	2.49987	-1.07368	-0.22058	-0.623172	-0.317777	2.07998	-0.64047	0.295165	-3.58377	-2.40798	-3.26108	23	10	32	27	22	17	4	5	181	105	29	12	10	35	67	169	1	5
																	LOC_Os03g19670 GDSL-like lipase/acylhydrolase, putative, expr...	LOC_Os03g19670 GDSL-like Lipase/Acylhydrolase superfamily pro...	LOC_Os03g19670 GO:0016788
																	LOC_Os03g19670 GDSL-like lipase/acylhydrolase, putative, expr...	LOC_Os03g19670 GDSL-like Lipase/Acylhydrolase superfamily pro...	LOC_Os03g19670 GO:0016788
																	Name: 2, dtype: object	Name: arabi-defline, dtype: object	Name: GO, dtype: object
GDSL-like lipase/acylhydrolase, putative, expressedLOC_Os03g62740.MSUv7.0	33129031	LOC_Os03g62740.1	LOC_Os03g62740.1	PF00657	PTHR22835,PTHR22835:SF231		3.1.1.1		GO:0016788	AT3G48460.1		GDSL-like Lipase/Acylhydrolase superfamily protein	LOC_Os03g62740.MSUv7.0	LOC_Os03g62740.1	defLine	GDSL-like lipase/acylhydrolase, putative, expressed	GDSL-like lipase/acylhydrolase, putative, expressed	GDSL-like Lipase/Acylhydrolase superfamily protein	GO:0016788	3.57471	1.61231	1.93528	0.0578669	1.89713	0.257707	1.90305	0.348607	-4.28363	-2.32124	-4.28956	-2.41214	8.402	0	2.164	86.344	30.038	162.921	22.723	24.964	243.984	277.615	179.535	18.407	2.59	185.48	412.047	329.051	20.259	20.345
GDSL-like lipase/acylhydrolase, putative, expressedLOC_Os05g34700.MSUv7.0	33156899	LOC_Os05g34700.1	LOC_Os05g34700.1	PF00657	PTHR22835,PTHR22835:SF165		3.1.1.3		GO:0016788	AT1G71691.2		GDSL-like Lipase/Acylhydrolase superfamily protein	LOC_Os05g34700.MSUv7.0	LOC_Os05g34700.1	defLine	GDSL-like lipase/acylhydrolase, putative, expressed	gene_id	locusName	locusName	0.765402	2.29641	0.0804581	0.240779	1.21089	0.525942	1.97522	-0.0804103	-8.4554	-9.9864	-9.21973	-9.38005	1	0	2	619	358	549	0	2	2415	2423	1505	2	2	363	1323	4126	3	0
																	LOC_Os05g34700 GDSL-like lipase/acylhydrolase, putative, expr...	LOC_Os05g34700 GDSL-like Lipase/Acylhydrolase superfamily pro...	LOC_Os05g34700 GO:0016788
																	LOC_Os05g34700 GDSL-like lipase/acylhydrolase, putative, expr...	LOC_Os05g34700 GDSL-like Lipase/Acylhydrolase superfamily pro...	LOC_Os05g34700 GO:0016788
																	Name: 2, dtype: object	Name: arabi-defline, dtype: object	Name: GO, dtype: object
GDSL-like lipase/acylhydrolase, putative, expressedLOC_Os11g48070.MSUv7.0	33163833	LOC_Os11g48070.1	LOC_Os11g48070.1	PF00657	PTHR14209,PTHR14209:SF8	KOG3035	3.1.1.2		GO:0016788	AT3G11210.1		SGNH hydrolase-type esterase superfamily protein	LOC_Os11g48070.MSUv7.0	LOC_Os11g48070.1	defLine	GDSL-like lipase/acylhydrolase, putative, expressed	GDSL-like lipase/acylhydrolase, putative, expressed	SGNH hydrolase-type esterase superfamily protein	GO:0016788	-0.345793	0.233454	-1.0801	-0.183489	1.78806	1.05375	0.37335	-0.0435929	-0.702739	-1.28199	0.711968	-0.184644	276	274	366	603	647	703	156	116	707	754	464	675	1049	769	619	970	204	315
GDSL-like lipase/acylhydrolase, putative, expressedLOC_Os12g17570.MSUv7.0	33153466	LOC_Os12g17570.1	LOC_Os12g17570.1	PF00657	PTHR22835,PTHR22835:SF207		3.1.1.3		GO:0016788	AT1G29670.1		GDSL-like Lipase/Acylhydrolase superfamily protein	LOC_Os12g17570.MSUv7.0	LOC_Os12g17570.1	defLine	GDSL-like lipase/acylhydrolase, putative, expressed	GDSL-like lipase/acylhydrolase, putative, expressed	GDSL-like Lipase/Acylhydrolase superfamily protein	GO:0016788	0	5.14721	0	0.211076	0	0	4.98723	0.0510897	-3.13858	-8.28579	-8.12581	-8.33688	0	0	0	0	0	4	0	0	43	43	42	0	0	14	56	56	0	0
calmodulin-binding heat-shock protein, putative, expressedLOC_Os09g39580.MSUv7.0	33142338	LOC_Os09g39580.1	LOC_Os09g39580.1	PF03893,PF01764	PTHR21493,PTHR21493:SF128		3.1.1.73		GO:0016042,GO:0006629	AT3G49050.1		alpha/beta-Hydrolases superfamily protein	LOC_Os09g39580.MSUv7.0	LOC_Os09g39580.1	defLine	calmodulin-binding heat-shock protein, putative, expressed	calmodulin-binding heat-shock protein, putative, expressed	alpha/beta-Hydrolases superfamily protein	GO:0016042,GO:0006629	-0.833653	-1.5871	0.159973	-0.209806	-0.855473	0.138153	-1.14632	0.230972	0.917651	1.6711	1.2085	1.57828	957.581	646.578	1002.75	472.91	529.335	810.927	293.452	250.356	166.094	197.707	135.084	373.496	395.727	237.679	219.544	289.82	228.908	205.093
gibberellin receptor GID1L2, putative, expressedLOC_Os07g41590.MSUv7.0	33117947	LOC_Os07g41590.1	LOC_Os07g41590.1	PF12695	PTHR23024,PTHR23024:SF155	KOG1515	3.1.1.1			AT5G23530.1	AtCXE18,CXE18	carboxyesterase 18	LOC_Os07g41590.MSUv7.0	LOC_Os07g41590.1	defLine	gibberellin receptor GID1L2, putative, expressed	gibberellin receptor GID1L2, putative, expressed	carboxyesterase 18		0.50799	2.07148	1.50507	0.526963	-1.94388	-0.946801	1.64145	0.0969385	-0.22519	-1.78868	-3.81053	-2.83242	9	10	18	15	8	35	15	5	66	77	57	3	2	46	60	56	4	2
hydrolase, alpha/beta fold family domain containing protein, expressedLOC_Os02g43340.MSUv7.0	33138344	LOC_Os02g43340.1	LOC_Os02g43340.1	PF00561	PTHR10794	KOG1838	2.3.1.84	K07019		AT3G50790.1		esterase/lipase/thioesterase family protein	LOC_Os02g43340.MSUv7.0	LOC_Os02g43340.1	defLine	hydrolase, alpha/beta fold family domain containing protein, expressed	gene_id	locusName	locusName	-0.700513	-1.87056	-0.204063	0.680245	-0.00173109	0.494719	-1.19739	1.35341	0.643711	1.81376	1.83937	0.955061	107	87	101	90	78	76	34	34	18	26	13	67	93	37	30	32	43	42
																	LOC_Os02g43340 hydrolase, alpha/beta fold family domain conta...	LOC_Os02g43340 esterase/lipase/thioesterase family protein	LOC_Os02g43340 NaN
																	LOC_Os02g43340 hydrolase, alpha/beta fold family domain conta...	LOC_Os02g43340 esterase/lipase/thioesterase family protein	LOC_Os02g43340 NaN
																	Name: 2, dtype: object	Name: arabi-defline, dtype: object	Name: GO, dtype: object
lipase class 3 family protein, putative, expressedLOC_Os11g43760.MSUv7.0	33160345	LOC_Os11g43760.1	LOC_Os11g43760.1	PF03893,PF01764	PTHR21493,PTHR21493:SF147	KOG2088			GO:0016042,GO:0006629	AT4G16070.1		Mono-/di-acylglycerol lipase, N-terminal;Lipase, class 3	LOC_Os11g43760.MSUv7.0	LOC_Os11g43760.1	defLine	lipase class 3 family protein, putative, expressed	lipase class 3 family protein, putative, expressed	Mono-/di-acylglycerol lipase, N-terminal;Lipase, class 3	GO:0016042,GO:0006629	-1.12955	-1.17566	0.0119816	0.636642	-0.982996	0.158532	-2.05364	-0.241335	0.760463	0.806577	1.8311	1.20644	2688	2317	2843	1442	1770	2996	735	615	479	1137	694	787	1380	663	215	496	607	476
lipase class 3 family protein, putative, expressedLOC_Os12g36770.MSUv7.0	33154364	LOC_Os12g36770.2	LOC_Os12g36770.2	PF03893,PF01764	PTHR21493,PTHR21493:SF147				GO:0016042,GO:0006629	AT4G16070.1		Mono-/di-acylglycerol lipase, N-terminal;Lipase, class 3	LOC_Os12g36770.MSUv7.0	LOC_Os12g36770.2	defLine	lipase class 3 family protein, putative, expressed	lipase class 3 family protein, putative, expressed	Mono-/di-acylglycerol lipase, N-terminal;Lipase, class 3	GO:0016042,GO:0006629	-0.899649	-1.32812	-0.041502	0.012193	-0.782445	0.0757015	-1.14866	0.191648	0.796924	1.22539	1.16314	1.10945	2333	1537	2660	1170	1376	2415	699	598	482	663	482	799	1237	877	504	646	512	524
GO:0016788 hydrolase activity, acting on ester bonds
	#pacId	transcriptName	peptideName	Pfam	Panther	KOG	KEGG/ec	KO	GO	Best-hit-arabi-name	arabi-symbol	arabi-defline	name	transcript_id	defLine	def_def	def_whole	annot_def	annot_GO	salinity (Mock_root)	salinity (Mock_shoot)	salinity (Ri_root)	salinity (Ri_shoot)	Ri (control_root)	Ri (salinity_root)	Ri (control_shoot)	Ri (salinity_shoot)	root (Mock_control)	root (Mock_salinity)	root (Ri_control)	root (Ri_salinity)	M.0.r.1	M.0.r.2	M.0.r.3	M.0.s.1	M.0.s.2	M.0.s.3	M.150.r.1	M.150.r.2	M.150.s.1	M.150.s.2	M.150.s.3	R.0.r.1	R.0.r.3	R.0.s.1	R.0.s.2	R.0.s.3	Ri.150.r.1	Ri.150.r.2
GDSL-like lipase/acylhydrolase, putative, expressedLOC_Os01g11660.MSUv7.0	33124142	LOC_Os01g11660.1	LOC_Os01g11660.1	PF00657	PTHR22835,PTHR22835:SF272		3.1.1.1		GO:0016788	AT1G28590.1		GDSL-like Lipase/Acylhydrolase superfamily protein	LOC_Os01g11660.MSUv7.0	LOC_Os01g11660.1	defLine	GDSL-like lipase/acylhydrolase, putative, expressed	GDSL-like lipase/acylhydrolase, putative, expressed	GDSL-like Lipase/Acylhydrolase superfamily protein	GO:0016788	0.47823	0.436626	1.25935	0.974939	-1.74214	-0.961015	-0.138719	0.399593	3.45655	3.49815	1.85313	2.13754	386	523	669	54	57	80	471	365	47	73	94	111	147	34	43	84	118	203
GDSL-like lipase/acylhydrolase, putative, expressedLOC_Os02g40440.MSUv7.0	33135241	LOC_Os02g40440.1	LOC_Os02g40440.1	PF00657	PTHR22835,PTHR22835:SF248		3.1.1.3		GO:0016788	AT5G33370.1		GDSL-like Lipase/Acylhydrolase superfamily protein	LOC_Os02g40440.MSUv7.0	LOC_Os02g40440.1	defLine	GDSL-like lipase/acylhydrolase, putative, expressed	GDSL-like lipase/acylhydrolase, putative, expressed	GDSL-like Lipase/Acylhydrolase superfamily protein	GO:0016788	0	2.06252	0	-0.470863	0	0	2.67794	0.144557	-7.74521	-9.80772	-10.4231	-9.95228	0	0	0	22	19	69	0	0	103	167	107	0	0	91	220	320	0	0
GDSL-like lipase/acylhydrolase, putative, expressedLOC_Os03g19670.MSUv7.0	33131268	LOC_Os03g19670.1	LOC_Os03g19670.1	PF00657	PTHR22835,PTHR22835:SF153		3.1.1.3		GO:0016788	AT3G50400.1		GDSL-like Lipase/Acylhydrolase superfamily protein	LOC_Os03g19670.MSUv7.0	LOC_Os03g19670.1	defLine	GDSL-like lipase/acylhydrolase, putative, expressed	gene_id	locusName	locusName	-1.37907	2.49987	-1.07368	-0.22058	-0.623172	-0.317777	2.07998	-0.64047	0.295165	-3.58377	-2.40798	-3.26108	23	10	32	27	22	17	4	5	181	105	29	12	10	35	67	169	1	5
																	LOC_Os03g19670 GDSL-like lipase/acylhydrolase, putative, expr...	LOC_Os03g19670 GDSL-like Lipase/Acylhydrolase superfamily pro...	LOC_Os03g19670 GO:0016788
																	LOC_Os03g19670 GDSL-like lipase/acylhydrolase, putative, expr...	LOC_Os03g19670 GDSL-like Lipase/Acylhydrolase superfamily pro...	LOC_Os03g19670 GO:0016788
																	Name: 2, dtype: object	Name: arabi-defline, dtype: object	Name: GO, dtype: object
GDSL-like lipase/acylhydrolase, putative, expressedLOC_Os03g25030.MSUv7.0	33128125	LOC_Os03g25030.1	LOC_Os03g25030.1	PF00657	PTHR22835,PTHR22835:SF189		3.1.1.49		GO:0016788	AT1G28650.1		GDSL-like Lipase/Acylhydrolase superfamily protein	LOC_Os03g25030.MSUv7.0	LOC_Os03g25030.1	defLine	GDSL-like lipase/acylhydrolase, putative, expressed	GDSL-like lipase/acylhydrolase, putative, expressed	GDSL-like Lipase/Acylhydrolase superfamily protein	GO:0016788	2.05764	1.62894	3.50028	1.79873	-1.94788	-0.505239	-1.95479	-1.78499	6.36041	6.78912	6.36732	8.06887	453	424	840	17	8	1	1046	1577	15	19	35	134	102	0	2	4	317	940
GDSL-like lipase/acylhydrolase, putative, expressedLOC_Os03g47940.MSUv7.0	33130110	LOC_Os03g47940.1	LOC_Os03g47940.1	PF00657	PTHR22835,PTHR22835:SF146		3.1.1.3		GO:0016788	AT5G03820.1		GDSL-like Lipase/Acylhydrolase family protein	LOC_Os03g47940.MSUv7.0	LOC_Os03g47940.1	defLine	GDSL-like lipase/acylhydrolase, putative, expressed	GDSL-like lipase/acylhydrolase, putative, expressed	GDSL-like Lipase/Acylhydrolase family protein	GO:0016788	0.82013	2.01658	-1.41997	0.124759	1.33879	-0.901311	1.91705	0.0252318	-5.9018	-7.09825	-6.48006	-8.02479	4	7	10	578	353	749	6	8	1831	2015	1793	14	15	497	1817	3623	7	3
GDSL-like lipase/acylhydrolase, putative, expressedLOC_Os03g62740.MSUv7.0	33129031	LOC_Os03g62740.1	LOC_Os03g62740.1	PF00657	PTHR22835,PTHR22835:SF231		3.1.1.1		GO:0016788	AT3G48460.1		GDSL-like Lipase/Acylhydrolase superfamily protein	LOC_Os03g62740.MSUv7.0	LOC_Os03g62740.1	defLine	GDSL-like lipase/acylhydrolase, putative, expressed	GDSL-like lipase/acylhydrolase, putative, expressed	GDSL-like Lipase/Acylhydrolase superfamily protein	GO:0016788	3.57471	1.61231	1.93528	0.0578669	1.89713	0.257707	1.90305	0.348607	-4.28363	-2.32124	-4.28956	-2.41214	8.402	0	2.164	86.344	30.038	162.921	22.723	24.964	243.984	277.615	179.535	18.407	2.59	185.48	412.047	329.051	20.259	20.345
GDSL-like lipase/acylhydrolase, putative, expressedLOC_Os03g64170.MSUv7.0	33133348	LOC_Os03g64170.1	LOC_Os03g64170.1	PF00657	PTHR22835,PTHR22835:SF282		3.1.1.3		GO:0016788	AT1G20120.1		GDSL-like Lipase/Acylhydrolase superfamily protein	LOC_Os03g64170.MSUv7.0	LOC_Os03g64170.1	defLine	GDSL-like lipase/acylhydrolase, putative, expressed	gene_id	locusName	locusName	-0.0970517	2.45894	-1.10547	0.212828	-0.343228	-1.35164	2.37032	0.124215	-2.26725	-4.82324	-4.9808	-6.2991	19	9	27	162	52	121	12	7	733	431	371	9	14	215	573	854	4	0
																	LOC_Os03g64170 GDSL-like lipase/acylhydrolase, putative, expr...	LOC_Os03g64170 GDSL-like Lipase/Acylhydrolase superfamily pro...	LOC_Os03g64170 GO:0016788
																	LOC_Os03g64170 GDSL-like lipase/acylhydrolase, putative, expr...	LOC_Os03g64170 GDSL-like Lipase/Acylhydrolase superfamily pro...	LOC_Os03g64170 GO:0016788
																	Name: 2, dtype: object	Name: arabi-defline, dtype: object	Name: GO, dtype: object
GDSL-like lipase/acylhydrolase, putative, expressedLOC_Os04g42860.MSUv7.0	33107932	LOC_Os04g42860.1	LOC_Os04g42860.1	PF00657	PTHR22835,PTHR22835:SF254		3.1.1.3		GO:0016788	AT5G33370.1		GDSL-like Lipase/Acylhydrolase superfamily protein	LOC_Os04g42860.MSUv7.0	LOC_Os04g42860.1	defLine	GDSL-like lipase/acylhydrolase, putative, expressed	GDSL-like lipase/acylhydrolase, putative, expressed	GDSL-like Lipase/Acylhydrolase superfamily protein	GO:0016788	1.13881	1.88766	2.62597	0.035889	-1.86522	-0.378059	2.06261	0.210834	-8.91657	-9.66543	-12.8444	-10.2543	0	1	0	295	76	520	1	0	1048	841	773	0	0	303	1204	1884	1	0
GDSL-like lipase/acylhydrolase, putative, expressedLOC_Os05g11910.MSUv7.0	33159783	LOC_Os05g11910.1	LOC_Os05g11910.1	PF00657	PTHR22835,PTHR22835:SF260		3.1.1.1		GO:0016788	AT5G45910.1		GDSL-like Lipase/Acylhydrolase superfamily protein	LOC_Os05g11910.MSUv7.0	LOC_Os05g11910.1	defLine	GDSL-like lipase/acylhydrolase, putative, expressed	GDSL-like lipase/acylhydrolase, putative, expressed	GDSL-like Lipase/Acylhydrolase superfamily protein	GO:0016788	-0.419005	2.08425	-0.225569	0.578321	-0.668631	-0.475196	1.21442	-0.291503	1.21304	-1.29021	-0.670014	-1.4739	1062	801	1356	667	296	841	539	361	1492	2454	2460	553	526	1161	1399	1251	209	230
GDSL-like lipase/acylhydrolase, putative, expressedLOC_Os05g34700.MSUv7.0	33156899	LOC_Os05g34700.1	LOC_Os05g34700.1	PF00657	PTHR22835,PTHR22835:SF165		3.1.1.3		GO:0016788	AT1G71691.2		GDSL-like Lipase/Acylhydrolase superfamily protein	LOC_Os05g34700.MSUv7.0	LOC_Os05g34700.1	defLine	GDSL-like lipase/acylhydrolase, putative, expressed	gene_id	locusName	locusName	0.765402	2.29641	0.0804581	0.240779	1.21089	0.525942	1.97522	-0.0804103	-8.4554	-9.9864	-9.21973	-9.38005	1	0	2	619	358	549	0	2	2415	2423	1505	2	2	363	1323	4126	3	0
																	LOC_Os05g34700 GDSL-like lipase/acylhydrolase, putative, expr...	LOC_Os05g34700 GDSL-like Lipase/Acylhydrolase superfamily pro...	LOC_Os05g34700 GO:0016788
																	LOC_Os05g34700 GDSL-like lipase/acylhydrolase, putative, expr...	LOC_Os05g34700 GDSL-like Lipase/Acylhydrolase superfamily pro...	LOC_Os05g34700 GO:0016788
																	Name: 2, dtype: object	Name: arabi-defline, dtype: object	Name: GO, dtype: object
GDSL-like lipase/acylhydrolase, putative, expressedLOC_Os06g05550.MSUv7.0	33145859	LOC_Os06g05550.1	LOC_Os06g05550.1	PF00657	PTHR22835,PTHR22835:SF191		3.1.1.3		GO:0016788	AT3G16370.1		GDSL-like Lipase/Acylhydrolase superfamily protein	LOC_Os06g05550.MSUv7.0	LOC_Os06g05550.1	defLine	GDSL-like lipase/acylhydrolase, putative, expressed	GDSL-like lipase/acylhydrolase, putative, expressed	GDSL-like Lipase/Acylhydrolase superfamily protein	GO:0016788	0	1.59852	2.62492	-0.0452354	0	2.62492	1.52283	-0.120924	-11.9021	-13.5006	-13.4249	-10.7548	0	0	0	603	535	765	0	0	1765	1346	1599	0	0	1957	1491	1573	1	0
GDSL-like lipase/acylhydrolase, putative, expressedLOC_Os06g43044.MSUv7.0	33149445	LOC_Os06g43044.1	LOC_Os06g43044.1	PF00657	PTHR22835,PTHR22835:SF193				GO:0016788	AT4G26790.2		GDSL-like Lipase/Acylhydrolase superfamily protein	LOC_Os06g43044.MSUv7.0	LOC_Os06g43044.1	defLine	GDSL-like lipase/acylhydrolase, putative, expressed	GDSL-like lipase/acylhydrolase, putative, expressed	GDSL-like Lipase/Acylhydrolase superfamily protein	GO:0016788	-0.560529	2.00419	-5.76797	-0.290931	0.745838	-4.46161	1.78346	-0.511662	-2.77302	-5.33774	-3.81064	-9.28768	5	3	4	55	34	16	2	1	93	250	48	4	7	152	87	112	0	0
GDSL-like lipase/acylhydrolase, putative, expressedLOC_Os07g39740.MSUv7.0	33118418	LOC_Os07g39740.1	LOC_Os07g39740.1	PF00657	PTHR22835,PTHR22835:SF226		3.2.1.51		GO:0016788	AT3G26430.1		GDSL-like Lipase/Acylhydrolase superfamily protein	LOC_Os07g39740.MSUv7.0	LOC_Os07g39740.1	defLine	GDSL-like lipase/acylhydrolase, putative, expressed	GDSL-like lipase/acylhydrolase, putative, expressed	GDSL-like Lipase/Acylhydrolase superfamily protein	GO:0016788	-4.07742	-2.40849	-1.17865	-0.62686	-1.80023	1.09854	-1.92171	-0.140083	-3.47583	-5.14476	-3.35435	-3.90614	26	47	19	403	438	572	1	1	43	141	48	1	14	126	121	90	3	1
GDSL-like lipase/acylhydrolase, putative, expressedLOC_Os09g04710.MSUv7.0	33144125	LOC_Os09g04710.1	LOC_Os09g04710.1	PF00657	PTHR22835,PTHR22835:SF131		3.1.1.3		GO:0016788	AT2G42990.1		GDSL-like Lipase/Acylhydrolase superfamily protein	LOC_Os09g04710.MSUv7.0	LOC_Os09g04710.1	defLine	GDSL-like lipase/acylhydrolase, putative, expressed	gene_id	locusName	locusName	0.0162671	1.60389	-0.0484686	0.0815574	-0.609189	-0.673924	1.9581	0.435767	-2.48443	-4.07206	-5.05173	-5.18175	14	11	9	71	20	170	8	5	222	218	197	6	6	265	329	303	3	4
																	LOC_Os09g04710 GDSL-like lipase/acylhydrolase, putative, expr...	LOC_Os09g04710 GDSL-like Lipase/Acylhydrolase superfamily pro...	LOC_Os09g04710 GO:0016788
																	LOC_Os09g04710 GDSL-like lipase/acylhydrolase, putative, expr...	LOC_Os09g04710 GDSL-like Lipase/Acylhydrolase superfamily pro...	LOC_Os09g04710 GO:0016788
																	Name: 2, dtype: object	Name: arabi-defline, dtype: object	Name: GO, dtype: object
GDSL-like lipase/acylhydrolase, putative, expressedLOC_Os11g48070.MSUv7.0	33163833	LOC_Os11g48070.1	LOC_Os11g48070.1	PF00657	PTHR14209,PTHR14209:SF8	KOG3035	3.1.1.2		GO:0016788	AT3G11210.1		SGNH hydrolase-type esterase superfamily protein	LOC_Os11g48070.MSUv7.0	LOC_Os11g48070.1	defLine	GDSL-like lipase/acylhydrolase, putative, expressed	GDSL-like lipase/acylhydrolase, putative, expressed	SGNH hydrolase-type esterase superfamily protein	GO:0016788	-0.345793	0.233454	-1.0801	-0.183489	1.78806	1.05375	0.37335	-0.0435929	-0.702739	-1.28199	0.711968	-0.184644	276	274	366	603	647	703	156	116	707	754	464	675	1049	769	619	970	204	315
GDSL-like lipase/acylhydrolase, putative, expressedLOC_Os12g17570.MSUv7.0	33153466	LOC_Os12g17570.1	LOC_Os12g17570.1	PF00657	PTHR22835,PTHR22835:SF207		3.1.1.3		GO:0016788	AT1G29670.1		GDSL-like Lipase/Acylhydrolase superfamily protein	LOC_Os12g17570.MSUv7.0	LOC_Os12g17570.1	defLine	GDSL-like lipase/acylhydrolase, putative, expressed	GDSL-like lipase/acylhydrolase, putative, expressed	GDSL-like Lipase/Acylhydrolase superfamily protein	GO:0016788	0	5.14721	0	0.211076	0	0	4.98723	0.0510897	-3.13858	-8.28579	-8.12581	-8.33688	0	0	0	0	0	4	0	0	43	43	42	0	0	14	56	56	0	0
esterase precursor, putative, expressedLOC_Os06g03900.MSUv7.0	33149586	LOC_Os06g03900.1	LOC_Os06g03900.1		PTHR22835,PTHR22835:SF270		3.1.1.1			AT1G28580.1		GDSL-like Lipase/Acylhydrolase superfamily protein	LOC_Os06g03900.MSUv7.0	LOC_Os06g03900.1	defLine	esterase precursor, putative, expressed	esterase precursor, putative, expressed	GDSL-like Lipase/Acylhydrolase superfamily protein		-3.48845	-2.65635	2.62373	-0.979009	-4.13973	1.97245	-2.2862	-0.608863	1.42243	0.590329	-0.431094	3.17165	336	270	432	70	158	297	13	21	37	25	4	4	28	41	24	30	19	2
esterase, putative, expressedLOC_Os01g12304.MSUv7.0	33119883	LOC_Os01g12304.1	LOC_Os01g12304.1	PF00657	PTHR22835,PTHR22835:SF272		3.1.1.1		GO:0016788	AT2G27360.1		GDSL-like Lipase/Acylhydrolase superfamily protein	LOC_Os01g12304.MSUv7.0	LOC_Os01g12304.1	defLine	esterase, putative, expressed	esterase, putative, expressed	GDSL-like Lipase/Acylhydrolase superfamily protein	GO:0016788	0.00267608	-1.36979	-0.138047	0.0351686	0.208334	0.0676109	-0.40284	1.00212	0.123565	1.49603	0.734739	0.561523	98	71	137	97	127	141	54	59	34	49	35	81	108	96	82	73	45	47
esterase, putative, expressedLOC_Os11g02580.MSUv7.0	33163150	LOC_Os11g02580.1	LOC_Os11g02580.1	PF12697	PTHR10992,PTHR10992:SF911	KOG4409,KOG1454	3.1.1.1			AT3G10870.1	ATMES17,MES17	methyl esterase 17	LOC_Os11g02580.MSUv7.0	LOC_Os11g02580.1	defLine	esterase, putative, expressed	esterase, putative, expressed	methyl esterase 17		0	-5.55515	2.64536	-1.6838	0	2.64536	-6.88998	-3.01863	-8.57378	-3.01863	-1.6838	2.64536	0	0	0	150.966	18.129	1	0	0	1	2	0	0	0	0	1	0	1	0
expressed proteinLOC_Os02g39155.MSUv7.0	33136301	LOC_Os02g39155.1	LOC_Os02g39155.1										LOC_Os02g39155.MSUv7.0	LOC_Os02g39155.1	defLine	expressed protein	expressed protein			-0.125783	-2.78132	0.036064	0.386201	-2.43781	-2.27596	-2.48625	0.681271	1.47566	4.13119	1.52409	1.17395	26.971	20	36	9	7.38	23	12	16	1.271	1	2	4	4	1	3	1.87	1	2
expressed proteinLOC_Os03g38350.MSUv7.0	33131391	LOC_Os03g38350.1	LOC_Os03g38350.1										LOC_Os03g38350.MSUv7.0	LOC_Os03g38350.1	defLine	expressed protein	expressed protein			-0.478006	-1.10882	-1.18653	0.441861	4.75338	4.04486	-1.34622	0.204455	-2.42312	-1.79231	3.67648	2.04809	12	8	10	52	61	103	4	4	26	25	30	168	276	27	32	16	40	98
nuclease PA3, putative, expressedLOC_Os04g55850.MSUv7.0	33111413	LOC_Os04g55850.1	LOC_Os04g55850.1	PF02265	PTHR33146,PTHR33146:SF1		3.1.30.1		GO:0006308,GO:0004519,GO:0003676	AT1G68290.1	ENDO 2	endonuclease 2	LOC_Os04g55850.MSUv7.0	LOC_Os04g55850.1	defLine	nuclease PA3, putative, expressed	gene_id	locusName	locusName	-0.408992	-1.28412	0.309229	0.673178	-0.797418	-0.0791969	-1.71021	0.247089	2.75833	3.63346	3.67112	3.30717	21353	16395	28681	3051	3743	6189	9375	9158	1030	2058	1367	8964	11514	1603	813	1196	5808	6525
																	LOC_Os04g55850 nuclease PA3, putative, expressed	LOC_Os04g55850 endonuclease 2	LOC_Os04g55850 GO:0006308,GO:0004519,GO:0003676
																	LOC_Os04g55850 nuclease PA3, putative, expressed	LOC_Os04g55850 endonuclease 2	LOC_Os04g55850 GO:0006308,GO:0004519,GO:0003676
																	Name: 2, dtype: object	Name: arabi-defline, dtype: object	Name: GO, dtype: object
phosphoesterase family protein, putative, expressedLOC_Os11g38050.MSUv7.0	33164392	LOC_Os11g38050.1	LOC_Os11g38050.1	PF04185	PTHR31956,PTHR31956:SF7		3.1.4.3	K01114	GO:0016788	AT3G03530.1	NPC4	non-specific phospholipase C4	LOC_Os11g38050.MSUv7.0	LOC_Os11g38050.1	defLine	phosphoesterase family protein, putative, expressed	phosphoesterase family protein, putative, expressed	non-specific phospholipase C4	GO:0016788	0.335249	-3.09821	1.71242	1.00299	-1.34815	0.0290176	-2.56438	1.53681	4.74694	8.1804	5.96317	6.67261	1724	824	1646	48	63	91	830	1093	10	5	4	459	406	20	1	10	675	708
GO term "GO:0016614 oxidoreductase activity, acting on CH-OH group of donors".
	#pacId	transcriptName	peptideName	Pfam	Panther	KOG	KEGG/ec	KO	GO	Best-hit-arabi-name	arabi-symbol	arabi-defline	name	transcript_id	defLine	def_def	def_whole	annot_def	annot_GO	salinity (Mock_root)	salinity (Mock_shoot)	salinity (Ri_root)	salinity (Ri_shoot)	Ri (control_root)	Ri (salinity_root)	Ri (control_shoot)	Ri (salinity_shoot)	root (Mock_control)	root (Mock_salinity)	root (Ri_control)	root (Ri_salinity)	M.0.r.1	M.0.r.2	M.0.r.3	M.0.s.1	M.0.s.2	M.0.s.3	M.150.r.1	M.150.r.2	M.150.s.1	M.150.s.2	M.150.s.3	R.0.r.1	R.0.r.3	R.0.s.1	R.0.s.2	R.0.s.3	Ri.150.r.1	Ri.150.r.2
FAD-binding and arabino-lactone oxidase domains containing protein, putative, expressedLOC_Os03g36530.MSUv7.0	33128183	LOC_Os03g36530.1	LOC_Os03g36530.1	PF04030,PF01565	PTHR13878,PTHR13878:SF54		1.1.3.8,1.1.3.37		GO:0055114,GO:0016020,GO:0003885,GO:0050660,GO:0016491	AT2G46760.1		D-arabinono-1,4-lactone oxidase family protein	LOC_Os03g36530.MSUv7.0	LOC_Os03g36530.1	defLine	FAD-binding and arabino-lactone oxidase domains containing protein, putative, expressed	FAD-binding and arabino-lactone oxidase domains containing protein, putative, expressed	D-arabinono-1,4-lactone oxidase family protein	GO:0055114,GO:0016020,GO:0003885,GO:0050660,GO:0016491	-0.499158	1.29823	0.0299163	0.408658	-0.927828	-0.398754	1.47121	0.581635	3.78698	1.98958	1.38794	1.0092	78	94	111	15	3	8	42	34	16	18	21	26	56	24	26	18	31	21
HOTHEAD precursor, putative, expressedLOC_Os08g31030.MSUv7.0	33105984	LOC_Os08g31030.1	LOC_Os08g31030.1	PF05199,PF00732	PTHR11552,PTHR11552:SF104	KOG1238		K15403	GO:0055114,GO:0016614,GO:0050660	AT1G72970.1	EDA17,HTH	Glucose-methanol-choline (GMC) oxidoreductase family protein	LOC_Os08g31030.MSUv7.0	LOC_Os08g31030.1	defLine	HOTHEAD precursor, putative, expressed	HOTHEAD precursor, putative, expressed	Glucose-methanol-choline (GMC) oxidoreductase family protein	GO:0055114,GO:0016614,GO:0050660	-0.858095	1.76675	0.157707	-0.0775241	0.16969	1.18549	2.26895	0.424677	-2.67359	-5.29843	-4.77285	-4.53762	24	16	8	114	57	246	8	2	443	352	342	21	8	639	617	532	8	13
HOTHEAD precursor, putative, expressedLOC_Os09g19930.MSUv7.0	33142346	LOC_Os09g19930.1	LOC_Os09g19930.1	PF05199,PF00732	PTHR11552,PTHR11552:SF69			K15403	GO:0055114,GO:0016614,GO:0050660,GO:0010430	AT1G72970.1	EDA17,HTH	Glucose-methanol-choline (GMC) oxidoreductase family protein	LOC_Os09g19930.MSUv7.0	LOC_Os09g19930.1	defLine	HOTHEAD precursor, putative, expressed	HOTHEAD precursor, putative, expressed	Glucose-methanol-choline (GMC) oxidoreductase family protein	GO:0055114,GO:0016614,GO:0050660,GO:0010430	-0.061798	1.87004	0.918044	-0.264574	-0.0341743	0.945668	2.17667	0.04206	-5.39896	-7.33079	-7.6098	-6.42719	21	3	7	506	316	920	7	4	2020	1690	1447	13	3	1045	2033	4185	8	11
alcohol oxidase, putative, expressedLOC_Os10g33520.MSUv7.0	33102159	LOC_Os10g33520.1	LOC_Os10g33520.1	PF13450,PF05199	PTHR10668,PTHR10668:SF82		1.1.3.20	K17756	GO:0055114,GO:0016614	AT3G23410.1	ATFAO3,FAO3	fatty alcohol oxidase 3	LOC_Os10g33520.MSUv7.0	LOC_Os10g33520.1	defLine	alcohol oxidase, putative, expressed	alcohol oxidase, putative, expressed	fatty alcohol oxidase 3	GO:0055114,GO:0016614	0.0331075	1.61642	0.255832	0.245419	-0.54331	-0.320585	1.33021	-0.0407873	-1.65634	-3.23965	-3.52986	-3.51945	29	25	21	76	91	152	15	14	231	257	307	12	16	229	274	213	12	11
berberine and berberine like domain containing protein, expressedLOC_Os08g06170.MSUv7.0	33104868	LOC_Os08g06170.1	LOC_Os08g06170.1	PF08031,PF01565	PTHR32448,PTHR32448:SF13				GO:0055114,GO:0050660,GO:0016491	AT5G44400.1		FAD-binding Berberine family protein	LOC_Os08g06170.MSUv7.0	LOC_Os08g06170.1	defLine	berberine and berberine like domain containing protein, expressed	berberine and berberine like domain containing protein, expressed	FAD-binding Berberine family protein	GO:0055114,GO:0050660,GO:0016491	-0.390733	-0.837223	-0.488056	2.25749	0.539247	0.441924	-2.62118	0.473528	-0.0615111	0.384979	3.09892	0.353375	226	138	272	272	251	331	84	94	114	223	76	285	201	52	39	36	89	106
cytokinin dehydrogenase precursor, putative, expressedLOC_Os01g71310.MSUv7.0	33120727	LOC_Os01g71310.1	LOC_Os01g71310.1	PF01565,PF09265	PTHR13878,PTHR13878:SF61		1.5.99.12	K00279	GO:0055114,GO:0050660,GO:0016491,GO:0019139,GO:0009690	AT2G41510.1	ATCKX1,CKX1	cytokinin oxidase/dehydrogenase 1	LOC_Os01g71310.MSUv7.0	LOC_Os01g71310.1	defLine	cytokinin dehydrogenase precursor, putative, expressed	cytokinin dehydrogenase precursor, putative, expressed	cytokinin oxidase/dehydrogenase 1	GO:0055114,GO:0050660,GO:0016491,GO:0019139,GO:0009690	-0.873219	-1.42262	-0.71053	0.565161	-0.869602	-0.706912	-1.78369	0.204098	-1.35746	-0.808057	-0.443377	-1.71907	218	265	232	523	957	1004	102	49	184	409	194	80	137	330	139	190	39	35
cytokinin dehydrogenase precursor, putative, expressedLOC_Os05g31040.MSUv7.0	33157947	LOC_Os05g31040.1	LOC_Os05g31040.1	PF01565,PF09265	PTHR13878,PTHR13878:SF61		1.5.99.12	K00279	GO:0055114,GO:0050660,GO:0016491,GO:0019139,GO:0009690	AT2G41510.1	ATCKX1,CKX1	cytokinin oxidase/dehydrogenase 1	LOC_Os05g31040.MSUv7.0	LOC_Os05g31040.1	defLine	cytokinin dehydrogenase precursor, putative, expressed	cytokinin dehydrogenase precursor, putative, expressed	cytokinin oxidase/dehydrogenase 1	GO:0055114,GO:0050660,GO:0016491,GO:0019139,GO:0009690	0.00523532	-2.79549	0.0256929	-0.712321	0.0540472	0.0745048	-1.39811	0.685066	-2.89459	-0.09386	-1.44243	-0.704421	88	54	68	490	785	777	34	44	80	101	65	54	63	218	187	314	41	37
cytokinin dehydrogenase precursor, putative, expressedLOC_Os10g34230.MSUv7.0	33102078	LOC_Os10g34230.1	LOC_Os10g34230.1	PF01565,PF09265	PTHR13878,PTHR13878:SF46	KOG1231	1.5.99.12	K00279	GO:0055114,GO:0050660,GO:0016491,GO:0019139,GO:0009690	AT2G41510.1	ATCKX1,CKX1	cytokinin oxidase/dehydrogenase 1	LOC_Os10g34230.MSUv7.0	LOC_Os10g34230.1	defLine	cytokinin dehydrogenase precursor, putative, expressed	cytokinin dehydrogenase precursor, putative, expressed	cytokinin oxidase/dehydrogenase 1	GO:0055114,GO:0050660,GO:0016491,GO:0019139,GO:0009690	0.575065	-1.59148	0.914806	0.504037	-0.908429	-0.568688	-1.01025	1.08527	1.68842	3.85496	1.79024	2.20101	779	578	879	257	355	286	660	581	58	135	64	353	281	122	138	151	226	354
glycerol-3-phosphate dehydrogenase, putative, expressedLOC_Os01g71280.MSUv7.0	33121867	LOC_Os01g71280.1	LOC_Os01g71280.1	PF01210,PF07479	PTHR11728,PTHR11728:SF17	KOG2711	1.1.1.8	K00006	GO:0055114,GO:0051287,GO:0046168,GO:0016616,GO:0005975,GO:0004367,GO:0009331,GO:0006072	AT2G41540.3	GPDHC1	6-phosphogluconate dehydrogenase family protein	LOC_Os01g71280.MSUv7.0	LOC_Os01g71280.1	defLine	glycerol-3-phosphate dehydrogenase, putative, expressed	glycerol-3-phosphate dehydrogenase, putative, expressed	6-phosphogluconate dehydrogenase family protein	GO:0055114,GO:0051287,GO:0046168,GO:0016616,GO:0005975,GO:0004367,GO:0009331,GO:0006072	-1.42973	1.3379	-0.778049	-0.0485521	-0.42529	0.226393	1.34681	-0.0396377	-0.563332	-3.33096	-2.33543	-3.06493	278	115	236	406	329	448	39	46	864	778	833	139	106	756	914	1115	37	40
reticuline oxidase-like protein precursor, putative, expressedLOC_Os06g35560.MSUv7.0	33148601	LOC_Os06g35560.1	LOC_Os06g35560.1	PF08031,PF01565	PTHR32448,PTHR32448:SF24		1.3.3.8		GO:0055114,GO:0050660,GO:0016491	AT1G30760.1		FAD-binding Berberine family protein	LOC_Os06g35560.MSUv7.0	LOC_Os06g35560.1	defLine	reticuline oxidase-like protein precursor, putative, expressed	reticuline oxidase-like protein precursor, putative, expressed	FAD-binding Berberine family protein	GO:0055114,GO:0050660,GO:0016491	2.05408	0.857334	0.208356	1.30002	3.51654	1.67082	-0.572958	-0.130274	-3.44594	-2.24919	0.643557	-0.448104	44	55	39	328	650	1105	125	95	433	719	1825	377	496	676	310	254	317	407
reticuline oxidase-like protein precursor, putative, expressedLOC_Os06g35590.MSUv7.0	33148955	LOC_Os06g35590.1	LOC_Os06g35590.1	PF08031,PF01565	PTHR32448,PTHR32448:SF28		1.3.3.8		GO:0055114,GO:0050660,GO:0016491	AT4G20820.1		FAD-binding Berberine family protein	LOC_Os06g35590.MSUv7.0	LOC_Os06g35590.1	defLine	reticuline oxidase-like protein precursor, putative, expressed	reticuline oxidase-like protein precursor, putative, expressed	FAD-binding Berberine family protein	GO:0055114,GO:0050660,GO:0016491	-0.136724	-13.1222	0	7.44245	-3.1455	-3.00878	-13.1222	7.44245	-9.97673	3.00878	0	-7.44245	0	0	3	2813	1244	0	0	1	0	0	0	0	0	0	0	0	0	0
[truncated: 5 more columns]

## Sheet: S6
Table S6 Gene list from region 7 having the GO term related to reproduction
GO term "GO:0009860 pollen tube growth".
	#pacId	transcriptName	peptideName	Pfam	Panther	KOG	KEGG/ec	KO	GO	Best-hit-arabi-name	arabi-symbol	arabi-defline	name	transcript_id	defLine	def_def	def_whole	annot_def	annot_GO	salinity (Mock_root)	salinity (Mock_shoot)	salinity (Ri_root)	salinity (Ri_shoot)	Ri (control_root)	Ri (salinity_root)	Ri (control_shoot)	Ri (salinity_shoot)	root (Mock_control)	root (Mock_salinity)	root (Ri_control)	root (Ri_salinity)	M.0.r.1	M.0.r.2	M.0.r.3	M.0.s.1	M.0.s.2	M.0.s.3	M.150.r.1	M.150.r.2	M.150.s.1	M.150.s.2	M.150.s.3	R.0.r.1	R.0.r.3	R.0.s.1	R.0.s.2	R.0.s.3	Ri.150.r.1	Ri.150.r.2
AGC_AGC_other_GWLd.1 - ACG kinases include homologs to PKA, PKG and PKC, expressedLOC_Os12g42660.MSUv7.0	33153448	LOC_Os12g42660.1	LOC_Os12g42660.1	PF07714	PTHR24356,PTHR24356:SF144		2.7.11.1		GO:0006468,GO:0004672	AT5G62310.1	IRE	AGC (cAMP-dependent, cGMP-dependent and protein kinase C) kinase family protein	LOC_Os12g42660.MSUv7.0	LOC_Os12g42660.1	defLine	AGC_AGC_other_GWLd.1 - ACG kinases include homologs to PKA, PKG and PKC, expressed	AGC_AGC_other_GWLd.1 - ACG kinases include homologs to PKA, PKG and PKC, expressed	AGC (cAMP-dependent, cGMP-dependent and protein kinase C) kinase family protein	GO:0006468,GO:0004672	-0.894917	-4.04482	-1.23805	0.543245	0.317904	-0.0252324	-2.81761	1.77046	-2.42034	0.729563	0.715172	-1.06613	15	13	12	205	50	4	3	5	4	5	5	15	12	15	9	13	2	3
AGC_PVPK_like_kin82y.12 - ACG kinases include homologs to PKA, PKG and PKC, expressedLOC_Os05g14750.MSUv7.0	33155682	LOC_Os05g14750.1	LOC_Os05g14750.1	PF07714,PF00069	PTHR24351,PTHR24351:SF55		2.7.11.1		GO:0006468,GO:0004672,GO:0005524	AT1G79250.2	AGC1.7	AGC kinase 1.7	LOC_Os05g14750.MSUv7.0	LOC_Os05g14750.1	defLine	AGC_PVPK_like_kin82y.12 - ACG kinases include homologs to PKA, PKG and PKC, expressed	AGC_PVPK_like_kin82y.12 - ACG kinases include homologs to PKA, PKG and PKC, expressed	AGC kinase 1.7	GO:0006468,GO:0004672,GO:0005524	3.92792	-5.9618	2.6054	-0.471095	0	-1.32253	-6.08312	-0.592413	-8.981	0.908726	-2.89788	0.178614	0	0	0	186	41	0	0	2	1	2	0	0	0	1	0	2	0	0
AGC_PVPK_like_kin82y.4 - ACG kinases include homologs to PKA, PKG and PKC, expressedLOC_Os01g13270.MSUv7.0	33121365	LOC_Os01g13270.1	LOC_Os01g13270.1	PF07714,PF00069	PTHR24351,PTHR24351:SF94		2.7.11.1		GO:0006468,GO:0004672,GO:0005524	AT1G79250.1	AGC1.7	AGC kinase 1.7	LOC_Os01g13270.MSUv7.0	LOC_Os01g13270.1	defLine	AGC_PVPK_like_kin82y.4 - ACG kinases include homologs to PKA, PKG and PKC, expressed	gene_id	locusName	locusName	-0.325337	-6.03	0.00507126	1.14129	4.37974	4.71015	-6.13957	1.03172	-2.40607	3.29859	8.11324	6.97702	11	6	10	157	10	2	5	3	1	1	0	148	156	0	1	1	86	125
																	LOC_Os01g13270 AGC_PVPK_like_kin82y.4 - ACG kinases include h...	LOC_Os01g13270 AGC kinase 1.7	LOC_Os01g13270 GO:0006468,GO:0004672,GO:0005524
																	LOC_Os01g13270 AGC_PVPK_like_kin82y.4 - ACG kinases include h...	LOC_Os01g13270 AGC kinase 1.7	LOC_Os01g13270 GO:0006468,GO:0004672,GO:0005524
																	Name: 2, dtype: object	Name: arabi-defline, dtype: object	Name: GO, dtype: object
ATROPGEF7/ROPGEF7, putative, expressedLOC_Os01g48410.MSUv7.0	33126496	LOC_Os01g48410.1	LOC_Os01g48410.1	PF03759	PTHR33101,PTHR33101:SF13				GO:0005089	AT4G13240.1	ATROPGEF9,ROPGEF9	RHO guanyl-nucleotide exchange factor 9	LOC_Os01g48410.MSUv7.0	LOC_Os01g48410.1	defLine	ATROPGEF7/ROPGEF7, putative, expressed	ATROPGEF7/ROPGEF7, putative, expressed	RHO guanyl-nucleotide exchange factor 9	GO:0005089	3.01151	-8.01377	-2.56136	-0.661634	-1.87762	-7.4505	-8.59956	-1.24742	-7.73514	3.29015	-1.0132	-2.91293	4	0	4	1882	168	0	0	24	0	2	5	1	0	3	1	1	0	0
ATROPGEF7/ROPGEF7, putative, expressedLOC_Os01g55520.MSUv7.0	33125100	LOC_Os01g55520.1	LOC_Os01g55520.1	PF03759	PTHR33101,PTHR33101:SF8				GO:0005089	AT1G52240.1	ATROPGEF11,PIRF1,ROPGEF11	RHO guanyl-nucleotide exchange factor 11	LOC_Os01g55520.MSUv7.0	LOC_Os01g55520.1	defLine	ATROPGEF7/ROPGEF7, putative, expressed	ATROPGEF7/ROPGEF7, putative, expressed	RHO guanyl-nucleotide exchange factor 11	GO:0005089	-0.852398	-4.55145	-0.345962	0.0810384	-0.387039	0.119397	-4.06633	0.566161	-3.70054	-0.00148635	-0.0212499	-0.44825	11	17	10	550	46	5	3	5	4	12	8	9	7	5	17	14	3	4
ATROPGEF7/ROPGEF7, putative, expressedLOC_Os02g17240.MSUv7.0	33135188	LOC_Os02g17240.1	LOC_Os02g17240.1	PF03759	PTHR33101,PTHR33101:SF10				GO:0005089	AT3G24620.1	ATROPGEF8,ROPGEF8	RHO guanyl-nucleotide exchange factor 8	LOC_Os02g17240.MSUv7.0	LOC_Os02g17240.1	defLine	ATROPGEF7/ROPGEF7, putative, expressed	ATROPGEF7/ROPGEF7, putative, expressed	RHO guanyl-nucleotide exchange factor 8	GO:0005089	-2.30106	-11.5286	-0.679819	1.66764	-0.10273	1.51851	-11.5286	1.66764	-3.58639	5.64119	7.83951	5.49206	23	22	49	1194	118	0	5	2	0	0	0	32	14	0	0	0	6	8
TKL_IRAK_CrRLK1L-1.11 - The CrRLK1L-1 subfamily has homology to the CrRLK1L homolog, expressedLOC_Os05g20150.MSUv7.0	33159903	LOC_Os05g20150.1	LOC_Os05g20150.1	PF11721,PF07714	PTHR27003,PTHR27003:SF7	KOG1187	2.7.11.1		GO:0006468,GO:0004672	AT5G28680.1	ANX2	Malectin/receptor-like protein kinase family protein	LOC_Os05g20150.MSUv7.0	LOC_Os05g20150.1	defLine	TKL_IRAK_CrRLK1L-1.11 - The CrRLK1L-1 subfamily has homology to the CrRLK1L homolog, expressed	TKL_IRAK_CrRLK1L-1.11 - The CrRLK1L-1 subfamily has homology to the CrRLK1L homolog, expressed	Malectin/receptor-like protein kinase family protein	GO:0006468,GO:0004672	3.5352	-8.75081	-2.56253	0.498627	-0.576837	-6.67456	-8.89412	0.355312	-8.16547	4.12054	0.151818	-2.90934	0	0	3	1044	75	2	0	14	2	0	0	1	0	0	0	2	0	0
armadillo/beta-catenin repeat family protein, putative, expressedLOC_Os03g14090.MSUv7.0	33128846	LOC_Os03g14090.1	LOC_Os03g14090.1	PF00514	PTHR23315,PTHR23315:SF128				GO:0005515	AT4G34940.1	ARO1	armadillo repeat only 1	LOC_Os03g14090.MSUv7.0	LOC_Os03g14090.1	defLine	armadillo/beta-catenin repeat family protein, putative, expressed	armadillo/beta-catenin repeat family protein, putative, expressed	armadillo repeat only 1	GO:0005515	0.247553	0.270359	1.3148	0.664803	-1.2712	-0.203956	-0.0354525	0.358992	1.56924	1.54644	0.333494	0.98349	339	241	379	140	109	170	220	203	113	159	151	106	106	113	104	163	140	132
armadillo/beta-catenin repeat family protein, putative, expressedLOC_Os08g43500.MSUv7.0	33104175	LOC_Os08g43500.1	LOC_Os08g43500.1		PTHR23315,PTHR23315:SF110					AT4G34940.1	ARO1	armadillo repeat only 1	LOC_Os08g43500.MSUv7.0	LOC_Os08g43500.1	defLine	armadillo/beta-catenin repeat family protein, putative, expressed	armadillo/beta-catenin repeat family protein, putative, expressed	armadillo repeat only 1		1.2132	-4.9787	0.44545	-0.245881	2.52094	1.75319	-4.53432	0.198495	-2.59468	3.59722	4.46058	5.15191	14	1	6	118	30	0	13	5	1	3	0	38	25	0	3	3	32	19
cyclic nucleotide-gated ion channel, putative, expressedLOC_Os12g06570.MSUv7.0	33150589	LOC_Os12g06570.1	LOC_Os12g06570.1	PF00027,PF00520	PTHR10217,PTHR10217:SF479			K05391	GO:0055085,GO:0016020,GO:0006811,GO:0005216	AT5G14870.1	ATCNGC18,CNGC18	cyclic nucleotide-gated channel 18	LOC_Os12g06570.MSUv7.0	LOC_Os12g06570.1	defLine	cyclic nucleotide-gated ion channel, putative, expressed	cyclic nucleotide-gated ion channel, putative, expressed	cyclic nucleotide-gated channel 18	GO:0055085,GO:0016020,GO:0006811,GO:0005216	-3.7941	-4.619	-0.434552	-0.479556	1.11999	4.47954	-5.4215	-1.28206	-4.52466	-3.69977	2.01683	2.06183	3	0	2	114	30	0	0	0	1	2	2	2	4	1	0	2	3	0
gibberellin receptor GID1L2, putative, expressedLOC_Os07g41590.MSUv7.0	33117947	LOC_Os07g41590.1	LOC_Os07g41590.1	PF12695	PTHR23024,PTHR23024:SF155	KOG1515	3.1.1.1			AT5G23530.1	AtCXE18,CXE18	carboxyesterase 18	LOC_Os07g41590.MSUv7.0	LOC_Os07g41590.1	defLine	gibberellin receptor GID1L2, putative, expressed	gibberellin receptor GID1L2, putative, expressed	carboxyesterase 18		0.50799	2.07148	1.50507	0.526963	-1.94388	-0.946801	1.64145	0.0969385	-0.22519	-1.78868	-3.81053	-2.83242	9	10	18	15	8	35	15	5	66	77	57	3	2	46	60	56	4	2
oxidoreductase, short chain dehydrogenase/reductase family domain containing family, expressedLOC_Os01g05840.MSUv7.0	33118985	LOC_Os01g05840.1	LOC_Os01g05840.1	PF00106	PTHR24320,PTHR24320:SF81	KOG1208	1.1.1.300,1.1.1.330		GO:0016491,GO:0008152	AT2G37540.1		NAD(P)-binding Rossmann-fold superfamily protein	LOC_Os01g05840.MSUv7.0	LOC_Os01g05840.1	defLine	oxidoreductase, short chain dehydrogenase/reductase family domain containing family, expressed	gene_id	locusName	locusName	-0.918605	2.09117	-1.71008	-0.0315216	3.54245	2.75097	1.98142	-0.14127	-3.65393	-6.6637	-2.0929	-3.77146	37	11	56	555	273	869	9	11	2667	1797	1391	359	276	919	2059	3168	41	106
																	LOC_Os01g05840 oxidoreductase, short chain dehydrogenase/redu...	LOC_Os01g05840 NAD(P)-binding Rossmann-fold superfamily protein	LOC_Os01g05840 GO:0016491,GO:0008152
																	LOC_Os01g05840 oxidoreductase, short chain dehydrogenase/redu...	LOC_Os01g05840 NAD(P)-binding Rossmann-fold superfamily protein	LOC_Os01g05840 GO:0016491,GO:0008152
																	Name: 2, dtype: object	Name: arabi-defline, dtype: object	Name: GO, dtype: object
pattern formation protein EMB30, putative, expressedLOC_Os04g02690.MSUv7.0	33110854	LOC_Os04g02690.1	LOC_Os04g02690.1	PF12783,PF01369	PTHR10663,PTHR10663:SF134			K18443	GO:0032012,GO:0005086	AT5G19610.1	GNL2	GNOM-like 2	LOC_Os04g02690.MSUv7.0	LOC_Os04g02690.1	defLine	pattern formation protein EMB30, putative, expressed	pattern formation protein EMB30, putative, expressed	GNOM-like 2	GO:0032012,GO:0005086	0	-5.35433	0	3.82379	0	0	-7.88423	1.29389	-7.88423	-2.5299	0	-3.82379	0	0	0	81	26	0	0	0	0	1	1	0	0	0	0	0	0	0
phosphatidylinositol-4-phosphate 5-kinase, putative, expressedLOC_Os12g04700.MSUv7.0	33151174	LOC_Os12g04700.1	LOC_Os12g04700.1	PF02493,PF01504	PTHR23086,PTHR23086:SF43		2.7.1.68	K00889	GO:0046488,GO:0016307	AT3G07960.1		Phosphatidylinositol-4-phosphate 5-kinase family protein	LOC_Os12g04700.MSUv7.0	LOC_Os12g04700.1	defLine	phosphatidylinositol-4-phosphate 5-kinase, putative, expressed	phosphatidylinositol-4-phosphate 5-kinase, putative, expressed	Phosphatidylinositol-4-phosphate 5-kinase family protein	GO:0046488,GO:0016307	-2.21175	-7.94131	-1.3884	0.862767	2.00683	2.83018	-7.13899	1.66509	-4.29549	1.43407	4.85033	2.59916	6.973	2	7	322.498	47.023	0	1.159	0	0	1	0	21.672	12.428	0	0	2.268	1.281	8.833
universal stress protein domain containing protein, putative, expressedLOC_Os10g32590.MSUv7.0	33099604	LOC_Os10g32590.1	LOC_Os10g32590.1	PF00582	PTHR31964,PTHR31964:SF32				GO:0006950	AT4G13450.1		Adenine nucleotide alpha hydrolases-like superfamily protein	LOC_Os10g32590.MSUv7.0	LOC_Os10g32590.1	defLine	universal stress protein domain containing protein, putative, expressed	universal stress protein domain containing protein, putative, expressed	Adenine nucleotide alpha hydrolases-like superfamily protein	GO:0006950	-2.63231	-8.44155	0	1.21807	-2.63231	0	-6.75761	2.902	-5.80923	0	-1.68393	-2.902	0	0	2	122	35	0	0	0	0	0	0	0	0	0	1	0	0	0
vacuolar protein sorting-associated protein 52, putative, expressedLOC_Os10g34680.MSUv7.0	33099988	LOC_Os10g34680.1	LOC_Os10g34680.1	PF04129	PTHR14190,PTHR14190:SF11					AT1G71270.1	ATVPS52,POK,TTD8	Vps52 / Sac2 family	LOC_Os10g34680.MSUv7.0	LOC_Os10g34680.1	defLine	vacuolar protein sorting-associated protein 52, putative, expressed	vacuolar protein sorting-associated protein 52, putative, expressed	Vps52 / Sac2 family		0	-6.18988	0	2.90157	0	0	-7.96683	1.12463	-7.96683	-1.77694	0	-2.90157	0	0	0	71	44	0	0	0	0	0	1	0	0	0	0	0	0	0
GO term "GO:0009856 pollination".
	#pacId	transcriptName	peptideName	Pfam	Panther	KOG	KEGG/ec	KO	GO	Best-hit-arabi-name	arabi-symbol	arabi-defline	name	transcript_id	defLine	def_def	def_whole	annot_def	annot_GO	salinity (Mock_root)	salinity (Mock_shoot)	salinity (Ri_root)	salinity (Ri_shoot)	Ri (control_root)	Ri (salinity_root)	Ri (control_shoot)	Ri (salinity_shoot)	root (Mock_control)	root (Mock_salinity)	root (Ri_control)	root (Ri_salinity)	M.0.r.1	M.0.r.2	M.0.r.3	M.0.s.1	M.0.s.2	M.0.s.3	M.150.r.1	M.150.r.2	M.150.s.1	M.150.s.2	M.150.s.3	R.0.r.1	R.0.r.3	R.0.s.1	R.0.s.2	R.0.s.3	Ri.150.r.1	Ri.150.r.2
AGC_PVPK_like_kin82y.12 - ACG kinases include homologs to PKA, PKG and PKC, expressedLOC_Os05g14750.MSUv7.0	33155682	LOC_Os05g14750.1	LOC_Os05g14750.1	PF07714,PF00069	PTHR24351,PTHR24351:SF55		2.7.11.1		GO:0006468,GO:0004672,GO:0005524	AT1G79250.2	AGC1.7	AGC kinase 1.7	LOC_Os05g14750.MSUv7.0	LOC_Os05g14750.1	defLine	AGC_PVPK_like_kin82y.12 - ACG kinases include homologs to PKA, PKG and PKC, expressed	AGC_PVPK_like_kin82y.12 - ACG kinases include homologs to PKA, PKG and PKC, expressed	AGC kinase 1.7	GO:0006468,GO:0004672,GO:0005524	3.92792	-5.9618	2.6054	-0.471095	0	-1.32253	-6.08312	-0.592413	-8.981	0.908726	-2.89788	0.178614	0	0	0	186	41	0	0	2	1	2	0	0	0	1	0	2	0	0
AGC_PVPK_like_kin82y.4 - ACG kinases include homologs to PKA, PKG and PKC, expressedLOC_Os01g13270.MSUv7.0	33121365	LOC_Os01g13270.1	LOC_Os01g13270.1	PF07714,PF00069	PTHR24351,PTHR24351:SF94		2.7.11.1		GO:0006468,GO:0004672,GO:0005524	AT1G79250.1	AGC1.7	AGC kinase 1.7	LOC_Os01g13270.MSUv7.0	LOC_Os01g13270.1	defLine	AGC_PVPK_like_kin82y.4 - ACG kinases include homologs to PKA, PKG and PKC, expressed	gene_id	locusName	locusName	-0.325337	-6.03	0.00507126	1.14129	4.37974	4.71015	-6.13957	1.03172	-2.40607	3.29859	8.11324	6.97702	11	6	10	157	10	2	5	3	1	1	0	148	156	0	1	1	86	125
																	LOC_Os01g13270 AGC_PVPK_like_kin82y.4 - ACG kinases include h...	LOC_Os01g13270 AGC kinase 1.7	LOC_Os01g13270 GO:0006468,GO:0004672,GO:0005524
																	LOC_Os01g13270 AGC_PVPK_like_kin82y.4 - ACG kinases include h...	LOC_Os01g13270 AGC kinase 1.7	LOC_Os01g13270 GO:0006468,GO:0004672,GO:0005524
																	Name: 2, dtype: object	Name: arabi-defline, dtype: object	Name: GO, dtype: object
ATROPGEF7/ROPGEF7, putative, expressedLOC_Os02g17240.MSUv7.0	33135188	LOC_Os02g17240.1	LOC_Os02g17240.1	PF03759	PTHR33101,PTHR33101:SF10				GO:0005089	AT3G24620.1	ATROPGEF8,ROPGEF8	RHO guanyl-nucleotide exchange factor 8	LOC_Os02g17240.MSUv7.0	LOC_Os02g17240.1	defLine	ATROPGEF7/ROPGEF7, putative, expressed	ATROPGEF7/ROPGEF7, putative, expressed	RHO guanyl-nucleotide exchange factor 8	GO:0005089	-2.30106	-11.5286	-0.679819	1.66764	-0.10273	1.51851	-11.5286	1.66764	-3.58639	5.64119	7.83951	5.49206	23	22	49	1194	118	0	5	2	0	0	0	32	14	0	0	0	6	8
CAMK_CAMK_like.10 - CAMK includes calcium/calmodulin depedent protein kinases, expressedLOC_Os01g59360.MSUv7.0	33119807	LOC_Os01g59360.1	LOC_Os01g59360.1	PF13499,PF07714	PTHR24349,PTHR24349:SF135	KOG0032	2.7.11.1	K13412	GO:0006468,GO:0004672	AT5G19360.1	CPK34	calcium-dependent protein kinase 34	LOC_Os01g59360.MSUv7.0	LOC_Os01g59360.1	defLine	CAMK_CAMK_like.10 - CAMK includes calcium/calmodulin depedent protein kinases, expressed	CAMK_CAMK_like.10 - CAMK includes calcium/calmodulin depedent protein kinases, expressed	calcium-dependent protein kinase 34	GO:0006468,GO:0004672	3.93467	-9.91116	-2.56104	0.749765	-0.95324	-7.44895	-10.7773	-0.116371	-8.93272	4.91311	0.89133	-2.41947	0	0	4	2265	211	2	0	24	1	1	0	1	0	1	0	0	0	0
CAMK_CAMK_like.42 - CAMK includes calcium/calmodulin depedent protein kinases, expressedLOC_Os11g04170.MSUv7.0	33163826	LOC_Os11g04170.1	LOC_Os11g04170.1	PF13499,PF07714	PTHR24349,PTHR24349:SF130	KOG0032	2.7.11.1	K13412	GO:0006468,GO:0004672	AT5G12180.1	CPK17	calcium-dependent protein kinase 17	LOC_Os11g04170.MSUv7.0	LOC_Os11g04170.1	defLine	CAMK_CAMK_like.42 - CAMK includes calcium/calmodulin depedent protein kinases, expressed	CAMK_CAMK_like.42 - CAMK includes calcium/calmodulin depedent protein kinases, expressed	calcium-dependent protein kinase 17	GO:0006468,GO:0004672	-0.867441	-3.14585	-1.19644	0.253133	0.170058	-0.158938	-3.24505	0.15393	-2.77887	-0.50046	0.636242	-0.813328	8.709	9.435	14.203	216.171	27.686	25.214	3.404	3.179	3.534	17.154	7.768	10.384	9.22	6.15	10.837	10.997	3.965	0
CSLD3 - cellulose synthase-like family D, expressedLOC_Os08g25710.MSUv7.0	33102575	LOC_Os08g25710.1	LOC_Os08g25710.1	PF14570,PF03552	PTHR13301,PTHR13301:SF32		2.4.2.24		GO:0030244,GO:0016760,GO:0016020	AT4G38190.1	ATCSLD4,CSLD4	cellulose synthase like D4	LOC_Os08g25710.MSUv7.0	LOC_Os08g25710.1	defLine	CSLD3 - cellulose synthase-like family D, expressed	CSLD3 - cellulose synthase-like family D, expressed	cellulose synthase like D4	GO:0030244,GO:0016760,GO:0016020	0.457617	-5.56769	0.939865	-0.60213	-1.12072	-0.63847	-5.11002	-0.144466	-3.70271	2.3226	0.286598	1.82859	8	6	11	335	50	1	10	3	4	1	2	4	2	2	4	5	4	4
FERONIA receptor-like kinase, putative, expressedLOC_Os04g49690.MSUv7.0	33111641	LOC_Os04g49690.1	LOC_Os04g49690.1	PF11721	PTHR34590,PTHR34590:SF3		2.7.11.1			AT3G51550.1	FER	Malectin/receptor-like protein kinase family protein	LOC_Os04g49690.MSUv7.0	LOC_Os04g49690.1	defLine	FERONIA receptor-like kinase, putative, expressed	FERONIA receptor-like kinase, putative, expressed	Malectin/receptor-like protein kinase family protein		-2.37258	-1.19299	-0.649488	0.717729	-3.19864	-1.47555	-2.20948	-0.298763	0.519413	-0.660176	-0.469747	-1.83696	1773	140	318	743	683	451	59	92	128	379	221	42	83	130	124	128	19	27
P21-Rho-binding domain containing protein, putative, expressedLOC_Os01g68890.MSUv7.0	33120446	LOC_Os01g68890.1	LOC_Os01g68890.1	PF00786	PTHR23177,PTHR23177:SF23					AT5G16490.1	RIC4	ROP-interactive CRIB motif-containing protein 4	LOC_Os01g68890.MSUv7.0	LOC_Os01g68890.1	defLine	P21-Rho-binding domain containing protein, putative, expressed	P21-Rho-binding domain containing protein, putative, expressed	ROP-interactive CRIB motif-containing protein 4		0.281569	1.85397	-0.144016	0.355046	0.0970594	-0.328526	1.49383	-0.00509318	2.06123	0.488831	0.66446	0.165398	210	113	247	44	44	90	130	124	172	149	198	153	169	116	147	192	53	88
P21-Rho-binding domain containing protein, putative, expressedLOC_Os11g28310.MSUv7.0	33164290	LOC_Os11g28310.1	LOC_Os11g28310.1	PF00786	PTHR23177,PTHR23177:SF16					AT4G04900.1	RIC10	ROP-interactive CRIB motif-containing protein 10	LOC_Os11g28310.MSUv7.0	LOC_Os11g28310.1	defLine	P21-Rho-binding domain containing protein, putative, expressed	P21-Rho-binding domain containing protein, putative, expressed	ROP-interactive CRIB motif-containing protein 10		-0.22923	2.14109	-0.885215	0.405417	-0.149367	-0.805353	1.7822	0.0465283	2.01156	-0.358759	0.0799931	-1.21064	52	23	47	10	9	20	18	20	50	50	42	28	30	25	47	50	7	10
TKL_IRAK_CrRLK1L-1.11 - The CrRLK1L-1 subfamily has homology to the CrRLK1L homolog, expressedLOC_Os05g20150.MSUv7.0	33159903	LOC_Os05g20150.1	LOC_Os05g20150.1	PF11721,PF07714	PTHR27003,PTHR27003:SF7	KOG1187	2.7.11.1		GO:0006468,GO:0004672	AT5G28680.1	ANX2	Malectin/receptor-like protein kinase family protein	LOC_Os05g20150.MSUv7.0	LOC_Os05g20150.1	defLine	TKL_IRAK_CrRLK1L-1.11 - The CrRLK1L-1 subfamily has homology to the CrRLK1L homolog, expressed	TKL_IRAK_CrRLK1L-1.11 - The CrRLK1L-1 subfamily has homology to the CrRLK1L homolog, expressed	Malectin/receptor-like protein kinase family protein	GO:0006468,GO:0004672	3.5352	-8.75081	-2.56253	0.498627	-0.576837	-6.67456	-8.89412	0.355312	-8.16547	4.12054	0.151818	-2.90934	0	0	3	1044	75	2	0	14	2	0	0	1	0	0	0	2	0	0
TKL_IRAK_CrRLK1L-1.2 - The CrRLK1L-1 subfamily has homology to the CrRLK1L homolog, expressedLOC_Os05g25370.MSUv7.0	33158573	LOC_Os05g25370.1	LOC_Os05g25370.1	PF11721,PF07714	PTHR27003,PTHR27003:SF78	KOG1187	2.7.11.1		GO:0006468,GO:0004672	AT3G51550.1	FER	Malectin/receptor-like protein kinase family protein	LOC_Os05g25370.MSUv7.0	LOC_Os05g25370.1	defLine	TKL_IRAK_CrRLK1L-1.2 - The CrRLK1L-1 subfamily has homology to the CrRLK1L homolog, expressed	TKL_IRAK_CrRLK1L-1.2 - The CrRLK1L-1 subfamily has homology to the CrRLK1L homolog, expressed	Malectin/receptor-like protein kinase family protein	GO:0006468,GO:0004672	0	-4.42436	-2.55271	-2.45269	2.55271	0	-2.34994	-0.37827	-10.8998	-6.47548	-5.99719	-6.09721	0	0	0	216	317	433	0	0	18	11	7	0	1	92	45	33	0	0
aminotransferase, putative, expressedLOC_Os08g10510.MSUv7.0	33104369	LOC_Os08g10510.1	LOC_Os08g10510.1	PF00202	PTHR11986,PTHR11986:SF90		2.6.1.19,2.6.1.96	K16871	GO:0030170,GO:0008483	AT3G22200.1	GABA-T,HER1,POP2	Pyridoxal phosphate (PLP)-dependent transferases superfamily protein	LOC_Os08g10510.MSUv7.0	LOC_Os08g10510.1	defLine	aminotransferase, putative, expressed	gene_id	locusName	locusName	-0.309659	-0.322998	-1.12829	-0.243184	1.20591	0.387281	0.222378	0.302192	-1.1998	-1.18646	-0.216269	-1.10137	723	434	640	1618	2066	1620	323	218	1124	1572	918	1245	951	1687	1767	2309	226	433
																	LOC_Os08g10510 aminotransferase, putative, expressed	LOC_Os08g10510 Pyridoxal phosphate (PLP)-dependent transferas...	LOC_Os08g10510 GO:0030170,GO:0008483
																	LOC_Os08g10510 aminotransferase, putative, expressed	LOC_Os08g10510 Pyridoxal phosphate (PLP)-dependent transferas...	LOC_Os08g10510 GO:0030170,GO:0008483
																	Name: 2, dtype: object	Name: arabi-defline, dtype: object	Name: GO, dtype: object
armadillo/beta-catenin repeat family protein, putative, expressedLOC_Os03g14090.MSUv7.0	33128846	LOC_Os03g14090.1	LOC_Os03g14090.1	PF00514	PTHR23315,PTHR23315:SF128				GO:0005515	AT4G34940.1	ARO1	armadillo repeat only 1	LOC_Os03g14090.MSUv7.0	LOC_Os03g14090.1	defLine	armadillo/beta-catenin repeat family protein, putative, expressed	armadillo/beta-catenin repeat family protein, putative, expressed	armadillo repeat only 1	GO:0005515	0.247553	0.270359	1.3148	0.664803	-1.2712	-0.203956	-0.0354525	0.358992	1.56924	1.54644	0.333494	0.98349	339	241	379	140	109	170	220	203	113	159	151	106	106	113	104	163	140	132
armadillo/beta-catenin repeat family protein, putative, expressedLOC_Os08g43500.MSUv7.0	33104175	LOC_Os08g43500.1	LOC_Os08g43500.1		PTHR23315,PTHR23315:SF110					AT4G34940.1	ARO1	armadillo repeat only 1	LOC_Os08g43500.MSUv7.0	LOC_Os08g43500.1	defLine	armadillo/beta-catenin repeat family protein, putative, expressed	armadillo/beta-catenin repeat family protein, putative, expressed	armadillo repeat only 1		1.2132	-4.9787	0.44545	-0.245881	2.52094	1.75319	-4.53432	0.198495	-2.59468	3.59722	4.46058	5.15191	14	1	6	118	30	0	13	5	1	3	0	38	25	0	3	3	32	19
cyclic nucleotide-gated ion channel, putative, expressedLOC_Os12g06570.MSUv7.0	33150589	LOC_Os12g06570.1	LOC_Os12g06570.1	PF00027,PF00520	PTHR10217,PTHR10217:SF479			K05391	GO:0055085,GO:0016020,GO:0006811,GO:0005216	AT5G14870.1	ATCNGC18,CNGC18	cyclic nucleotide-gated channel 18	LOC_Os12g06570.MSUv7.0	LOC_Os12g06570.1	defLine	cyclic nucleotide-gated ion channel, putative, expressed	cyclic nucleotide-gated ion channel, putative, expressed	cyclic nucleotide-gated channel 18	GO:0055085,GO:0016020,GO:0006811,GO:0005216	-3.7941	-4.619	-0.434552	-0.479556	1.11999	4.47954	-5.4215	-1.28206	-4.52466	-3.69977	2.01683	2.06183	3	0	2	114	30	0	0	0	1	2	2	2	4	1	0	2	3	0
cysteine synthase, putative, expressedLOC_Os06g36880.MSUv7.0	33145921	LOC_Os06g36880.1	LOC_Os06g36880.1	PF00291	PTHR10314,PTHR10314:SF114	KOG1252	2.5.1.47	K01738		AT3G59760.1	ATCS-C,OASC	O-acetylserine (thiol) lyase isoform C	LOC_Os06g36880.MSUv7.0	LOC_Os06g36880.1	defLine	cysteine synthase, putative, expressed	cysteine synthase, putative, expressed	O-acetylserine (thiol) lyase isoform C		2.45455	0.815391	0.369702	-0.529422	3.98171	1.89686	0.582986	-0.761827	0.431848	2.071	3.83057	4.7297	161	43	126	98	120	89	391	270	126	186	147	1411	1305	173	99	160	857	1393
gibberellin receptor GID1L2, putative, expressedLOC_Os07g41590.MSUv7.0	33117947	LOC_Os07g41590.1	LOC_Os07g41590.1	PF12695	PTHR23024,PTHR23024:SF155	KOG1515	3.1.1.1			AT5G23530.1	AtCXE18,CXE18	carboxyesterase 18	LOC_Os07g41590.MSUv7.0	LOC_Os07g41590.1	defLine	gibberellin receptor GID1L2, putative, expressed	gibberellin receptor GID1L2, putative, expressed	carboxyesterase 18		0.50799	2.07148	1.50507	0.526963	-1.94388	-0.946801	1.64145	0.0969385	-0.22519	-1.78868	-3.81053	-2.83242	9	10	18	15	8	35	15	5	66	77	57	3	2	46	60	56	4	2
nucleoside-triphosphatase, putative, expressedLOC_Os11g03230.MSUv7.0	33164649	LOC_Os11g03230.1	LOC_Os11g03230.1	PF01150	PTHR11782,PTHR11782:SF39		3.6.1.5		GO:0016787	AT5G18280.1	APY2,ATAPY2	apyrase 2	LOC_Os11g03230.MSUv7.0	LOC_Os11g03230.1	defLine	nucleoside-triphosphatase, putative, expressed	gene_id	locusName	locusName	1.00466	-1.13099	0.821311	0.460616	-1.00673	-1.19008	-1.33342	0.258183	-4.10258	-1.96692	-3.77589	-3.41519	27	35	37	736.001	632	891.032	49.127	27	337.174	358	171.067	8	19	195.254	281.028	350.018	13	14
																	LOC_Os11g03230 nucleoside-triphosphatase, putative, expressed	LOC_Os11g03230 apyrase 2	LOC_Os11g03230 GO:0016787
																	LOC_Os11g03230 nucleoside-triphosphatase, putative, expressed	LOC_Os11g03230 apyrase 1	LOC_Os11g03230 GO:0016787
																	LOC_Os11g03230 nucleoside-triphosphatase, putative, expressed	LOC_Os11g03230 apyrase 2	LOC_Os11g03230 GO:0016787
																	Name: 2, dtype: object	Name: arabi-defline, dtype: object	Name: GO, dtype: object
nucleoside-triphosphatase, putative, expressedLOC_Os11g03270.MSUv7.0	33163290	LOC_Os11g03270.1	LOC_Os11g03270.1	PF01150	PTHR11782,PTHR11782:SF39	KOG1385	3.6.1.5		GO:0016787	AT5G18280.2	APY2,ATAPY2	apyrase 2	LOC_Os11g03270.MSUv7.0	LOC_Os11g03270.1	defLine	nucleoside-triphosphatase, putative, expressed	nucleoside-triphosphatase, putative, expressed	apyrase 2	GO:0016787	-1.85388	5.05771	-0.0418313	-1.38773	4.2309	6.04296	5.93917	-0.506264	-0.464303	-7.3759	-2.17257	-0.826675	1	0	0	0	1	1	0	0	39	14	13	1	13	48	45	46	6	6
nucleoside-triphosphatase, putative, expressedLOC_Os11g25330.MSUv7.0	33162581	LOC_Os11g25330.1	LOC_Os11g25330.1	PF01150	PTHR11782,PTHR11782:SF41	KOG1385	3.6.1.5		GO:0016787	AT3G04080.1	APY1,ATAPY1	apyrase 1	LOC_Os11g25330.MSUv7.0	LOC_Os11g25330.1	defLine	nucleoside-triphosphatase, putative, expressed	nucleoside-triphosphatase, putative, expressed	apyrase 1	GO:0016787	2.99772	7.32664	2.64565	0.542386	0	-0.352071	6.34784	-0.436419	0	-4.32892	-6.34784	-4.24457	0	0	0	0	0	0	1	0	32.792	19.626	12.532	0	0	5.532	17.306	13.377	1	0
pattern formation protein EMB30, putative, expressedLOC_Os04g02690.MSUv7.0	33110854	LOC_Os04g02690.1	LOC_Os04g02690.1	PF12783,PF01369	PTHR10663,PTHR10663:SF134			K18443	GO:0032012,GO:0005086	AT5G19610.1	GNL2	GNOM-like 2	LOC_Os04g02690.MSUv7.0	LOC_Os04g02690.1	defLine	pattern formation protein EMB30, putative, expressed	pattern formation protein EMB30, putative, expressed	GNOM-like 2	GO:0032012,GO:0005086	0	-5.35433	0	3.82379	0	0	-7.88423	1.29389	-7.88423	-2.5299	0	-3.82379	0	0	0	81	26	0	0	0	0	1	1	0	0	0	0	0	0	0
phosphatidylinositol-4-phosphate 5-kinase, putative, expressedLOC_Os03g24170.MSUv7.0	33128358	LOC_Os03g24170.1	LOC_Os03g24170.1	PF01504	PTHR23086,PTHR23086:SF57	KOG0229	2.7.1.68	K00889	GO:0046488,GO:0016307	AT3G56960.1	PIP5K4	phosphatidyl inositol monophosphate 5 kinase 4	LOC_Os03g24170.MSUv7.0	LOC_Os03g24170.1	defLine	phosphatidylinositol-4-phosphate 5-kinase, putative, expressed	phosphatidylinositol-4-phosphate 5-kinase, putative, expressed	phosphatidyl inositol monophosphate 5 kinase 4	GO:0046488,GO:0016307	2.99975	-2.7041	-2.7175	0.213884	5.32646	-0.390792	-2.87216	0.0458222	-10.0977	-4.39389	-1.89912	-4.83051	0	0	0	354	112	36	1	0	29	25	15	4	4	16	18	35	0	0
phosphatidylinositol-4-phosphate 5-kinase, putative, expressedLOC_Os11g04840.MSUv7.0	33162964	LOC_Os11g04840.1	LOC_Os11g04840.1	PF02493,PF01504	PTHR23086,PTHR23086:SF43	KOG0229	2.7.1.68	K00889	GO:0046488,GO:0016307	AT3G07960.1		Phosphatidylinositol-4-phosphate 5-kinase family protein	LOC_Os11g04840.MSUv7.0	LOC_Os11g04840.1	defLine	phosphatidylinositol-4-phosphate 5-kinase, putative, expressed	phosphatidylinositol-4-phosphate 5-kinase, putative, expressed	Phosphatidylinositol-4-phosphate 5-kinase family protein	GO:0046488,GO:0016307	0.0503704	-6.34024	-1.25644	-0.0921912	1.11125	-0.195554	-4.69886	1.54919	-3.29157	3.09904	2.51854	1.3543	15.564	7	3	248.381	51.488	0	3.841	6	2	1	0	15.328	14.572	0	1	10.732	2.94	5.167
phosphatidylinositol-4-phosphate 5-kinase, putative, expressedLOC_Os12g04700.MSUv7.0	33151174	LOC_Os12g04700.1	LOC_Os12g04700.1	PF02493,PF01504	PTHR23086,PTHR23086:SF43		2.7.1.68	K00889	GO:0046488,GO:0016307	AT3G07960.1		Phosphatidylinositol-4-phosphate 5-kinase family protein	LOC_Os12g04700.MSUv7.0	LOC_Os12g04700.1	defLine	phosphatidylinositol-4-phosphate 5-kinase, putative, expressed	phosphatidylinositol-4-phosphate 5-kinase, putative, expressed	Phosphatidylinositol-4-phosphate 5-kinase family protein	GO:0046488,GO:0016307	-2.21175	-7.94131	-1.3884	0.862767	2.00683	2.83018	-7.13899	1.66509	-4.29549	1.43407	4.85033	2.59916	6.973	2	7	322.498	47.023	0	1.159	0	0	1	0	21.672	12.428	0	0	2.268	1.281	8.833
plastocyanin-like domain containing protein, putative, expressedLOC_Os02g49850.MSUv7.0	33137904	LOC_Os02g49850.1	LOC_Os02g49850.1	PF02298	PTHR33021,PTHR33021:SF3				GO:0009055	AT2G02850.1	ARPN	plantacyanin	LOC_Os02g49850.MSUv7.0	LOC_Os02g49850.1	defLine	plastocyanin-like domain containing protein, putative, expressed	plastocyanin-like domain containing protein, putative, expressed	plantacyanin	GO:0009055	0.0387069	1.22346	-0.837651	-0.21638	0.182114	-0.694244	1.36319	-0.076651	2.00186	0.817106	0.820784	0.199512	218	109	158	37	52	69	96	88	89	83	127	134	159	138	123	106	25	62
plastocyanin-like domain containing protein, putative, expressedLOC_Os03g50160.MSUv7.0	33130419	LOC_Os03g50160.1	LOC_Os03g50160.1	PF02298	PTHR33021,PTHR33021:SF38				GO:0009055	AT2G02850.1	ARPN	plantacyanin	LOC_Os03g50160.MSUv7.0	LOC_Os03g50160.1	defLine	plastocyanin-like domain containing protein, putative, expressed	plastocyanin-like domain containing protein, putative, expressed	plantacyanin	GO:0009055	-0.758936	1.49183	-0.454943	0.569398	-1.30329	-0.999298	0.641747	-0.280686	2.73297	0.482201	0.787931	-0.23641	597	349	400	94	90	75	117	176	128	342	171	93	203	153	117	106	55	62
plastocyanin-like domain containing protein, putative, expressedLOC_Os03g63390.MSUv7.0	33127008	LOC_Os03g63390.1	LOC_Os03g63390.1	PF02298	PTHR33021,PTHR33021:SF38				GO:0009055	AT2G02850.1	ARPN	plantacyanin	LOC_Os03g63390.MSUv7.0	LOC_Os03g63390.1	defLine	plastocyanin-like domain containing protein, putative, expressed	plastocyanin-like domain containing protein, putative, expressed	plantacyanin	GO:0009055	0.0905609	2.32944	-0.399364	0.113899	-0.39592	-0.885845	1.94898	-0.266559	2.83729	0.598413	0.492391	-0.0208729	414	299	465	44	15	165	251	216	320	320	254	229	250	249	236	276	77	113
protein disulfide isomerase, putative, expressedLOC_Os01g58194.MSUv7.0	33120256	LOC_Os01g58194.1	LOC_Os01g58194.1	PF13905	PTHR13871,PTHR13871:SF48	KOG2501	1.8.1.8	K17609		AT1G60420.1		DC1 domain-containing protein	LOC_Os01g58194.MSUv7.0	LOC_Os01g58194.1	defLine	protein disulfide isomerase, putative, expressed	protein disulfide isomerase, putative, expressed	DC1 domain-containing protein		-1.1538	-0.0688653	-0.412382	0.483447	0.521514	1.26293	-0.877674	-0.325361	-0.122126	-1.20706	1.27706	0.381232	302	216	176	238	389	376	54	63	146	332	324	232	311	184	169	141	96	147
receptor-like protein kinase At3g46290 precursor, putative, expressedLOC_Os05g25430.MSUv7.0	33156583	LOC_Os05g25430.1	LOC_Os05g25430.1	PF07714,PF12819	PTHR27003,PTHR27003:SF78		2.7.11.1		GO:0006468,GO:0004672	AT3G51550.1	FER	Malectin/receptor-like protein kinase family protein	LOC_Os05g25430.MSUv7.0	LOC_Os05g25430.1	defLine	receptor-like protein kinase At3g46290 precursor, putative, expressed	gene_id	locusName	locusName	-0.233893	-1.30585	-0.116931	-0.404864	1.38098	1.49794	-0.697631	0.203351	-2.10982	-1.03787	-0.0312107	0.256722	68	74	88	263	473	604	41	33	145	196	107	154	172	402	199	138	96	104
																	LOC_Os05g25430 receptor-like protein kinase At3g46290 precurs...	LOC_Os05g25430 Malectin/receptor-like protein kinase family p...	LOC_Os05g25430 GO:0006468,GO:0004672
																	LOC_Os05g25430 receptor-like protein kinase At3g46290 precurs...	LOC_Os05g25430 Malectin/receptor-like protein kinase family p...	LOC_Os05g25430 GO:0006468,GO:0004672
																	Name: 2, dtype: object	Name: arabi-defline, dtype: object	Name: GO, dtype: object
tetratricopeptide repeat domain containing protein, expressedLOC_Os11g46230.MSUv7.0	33161210	LOC_Os11g46230.1	LOC_Os11g46230.1	PF07719	PTHR23083,PTHR23083:SF39				GO:0035058,GO:0034464	AT2G43040.1	NPG1	tetratricopeptide repeat (TPR)-containing protein	LOC_Os11g46230.MSUv7.0	LOC_Os11g46230.1	defLine	tetratricopeptide repeat domain containing protein, expressed	gene_id	locusName	locusName	-2.33613	-6.15756	-0.816476	0.0168843	0.742305	2.26196	-8.19393	-2.01949	-4.50591	-0.684479	4.43033	3.59697	5	5	5	339	77	0	0	1	0	2	3	2	12	0	0	1	5	1
																	LOC_Os11g46230 tetratricopeptide repeat domain containing pro...	LOC_Os11g46230 tetratricopeptide repeat (TPR)-containing protein	LOC_Os11g46230 GO:0035058,GO:0034464
																	LOC_Os11g46230 tetratricopeptide repeat domain containing pro...	LOC_Os11g46230 tetratricopeptide repeat (TPR)-containing protein	LOC_Os11g46230 GO:0035058,GO:0034464
																	Name: 2, dtype: object	Name: arabi-defline, dtype: object	Name: GO, dtype: object
vacuolar protein sorting-associated protein 52, putative, expressedLOC_Os10g34680.MSUv7.0	33099988	LOC_Os10g34680.1	LOC_Os10g34680.1	PF04129	PTHR14190,PTHR14190:SF11					AT1G71270.1	ATVPS52,POK,TTD8	Vps52 / Sac2 family	LOC_Os10g34680.MSUv7.0	LOC_Os10g34680.1	defLine	vacuolar protein sorting-associated protein 52, putative, expressed	vacuolar protein sorting-associated protein 52, putative, expressed	Vps52 / Sac2 family		0	-6.18988	0	2.90157	0	0	-7.96683	1.12463	-7.96683	-1.77694	0	-2.90157	0	0	0	71	44	0	0	0	0	0	1	0	0	0	0	0	0	0
[truncated: 5 more columns]

## Sheet: S7
Table S7 Gene list from region 7 having the GO term related to Pi homeostasis
GO:0016036_cellular response to phosphate starvation
	#pacId	transcriptName	peptideName	Pfam	Panther	KOG	KEGG/ec	KO	GO	Best-hit-arabi-name	arabi-symbol	arabi-defline	name	transcript_id	defLine	def_def	salinity (Mock_root)	salinity (Mock_shoot)	salinity (Ri_root)	salinity (Ri_shoot)	Ri (control_root)	Ri (salinity_root)	Ri (control_shoot)	Ri (salinity_shoot)	root (Mock_control)	root (Mock_salinity)	root (Ri_control)	root (Ri_salinity)	M.0.r.1	M.0.r.2	M.0.r.3	M.0.s.1	M.0.s.2	M.0.s.3	M.150.r.1	M.150.r.2	M.150.s.1	M.150.s.2	M.150.s.3	R.0.r.1	R.0.r.3	R.0.s.1	R.0.s.2	R.0.s.3	Ri.150.r.1	Ri.150.r.2	Ri.150.r.3	Ri.150.s.1	Ri.150.s.2
LOC_Os01g03549.MSUv7.0	33122216	LOC_Os01g03549.1	LOC_Os01g03549.1	PF07731	PTHR11709,PTHR11709:SF89		1.3.3.5		GO:0055114,GO:0016491,GO:0005507	AT1G23010.1	LPR1	Cupredoxin superfamily protein	LOC_Os01g03549.MSUv7.0	LOC_Os01g03549.1	defLine	multi-copper oxidase type I family protein, putative, expressed	-0.430115	-1.06755	0.411155	0.267467	1.59184	2.43311	-0.805125	0.529892	-3.55557	-2.91814	-1.1586	-1.01491	16	19	38	227	345	583	7	13	117	205	133	63	55	280	194	109	37	68	44	323	155
LOC_Os01g03640.MSUv7.0	33120268	LOC_Os01g03640.1	LOC_Os01g03640.1	PF00394,PF07732,PF07731	PTHR11709,PTHR11709:SF117		1.3.3.5		GO:0055114,GO:0016491,GO:0005507	AT1G23010.1	LPR1	Cupredoxin superfamily protein	LOC_Os01g03640.MSUv7.0	LOC_Os01g03640.1	defLine	multicopper oxidase domain containing protein, expressed	-4.43851	-2.64062	-1.17769	3.7214	-2.48472	0.776107	-4.21391	2.14811	4.08635	2.28845	5.81553	0.916442	323	69	273	25	10	12	9	2	3	0	3	43	17	0	0	2	6	5	15	20	7
LOC_Os01g04920.MSUv7.0	33124598	LOC_Os01g04920.1	LOC_Os01g04920.1	PF13579,PF00534	PTHR12526,PTHR12526:SF372	KOG1111		K06119		AT5G01220.1	SQD2	sulfoquinovosyldiacylglycerol 2	LOC_Os01g04920.MSUv7.0	LOC_Os01g04920.1	defLine	glycosyl transferase, group 1 domain containing protein, expressed	-0.452623	-1.71557	0.165027	0.384748	-0.6615	-0.0438497	-1.46264	0.637676	0.921583	2.18453	1.72273	1.50301	13356	11182	17111	6711	8532	14028	5922	5431	2093	3353	1966	5555	8689	4107	1964	3649	3744	4132	7433	5271	2673
LOC_Os01g56880.MSUv7.0	33122806	LOC_Os01g56880.1	LOC_Os01g56880.1	PF14008,PF16656,PF00149	PTHR22953,PTHR22953:SF22	KOG1378	3.1.3.41,3.1.3.2,3.1.3.60		GO:0016787	AT2G16430.2	ATPAP10,PAP10	purple acid phosphatase 10	LOC_Os01g56880.MSUv7.0	LOC_Os01g56880.1	defLine	purple acid phosphatase precursor, putative, expressed	-0.853582	-1.48319	0.252669	0.0436308	-1.07579	0.0304562	-1.35803	0.168799	0.706616	1.33623	0.988848	1.19789	12536	9341	14403	6469	9939	13016	3578	3863	2313	4083	2411	4107	5135	4593	2509	3340	2748	2836	4962	4576	2379
LOC_Os02g10780.MSUv7.0	33140262	LOC_Os02g10780.1	LOC_Os02g10780.1	PF03105	PTHR10783,PTHR10783:SF44	KOG1161				AT5G20150.1	ATSPX1,SPX1	SPX domain gene 1	LOC_Os02g10780.MSUv7.0	LOC_Os02g10780.1	defLine	SPX domain containing protein, putative, expressed	-0.868423	-2.28007	0.11024	0.242976	-0.950925	0.0277376	-1.32967	1.19338	0.637161	2.04881	1.01591	0.883171	2194	3003	3704	1497	2197	4137	861	980	417	705	222	784	1767	1437	551	818	643	736	1237	1379	923
LOC_Os02g55910.MSUv7.0	33136507	LOC_Os02g55910.1	LOC_Os02g55910.1	PF13528	PTHR21015,PTHR21015:SF25		2.4.1.46	K03715		AT5G20410.1	ATMGD2,MGD2	monogalactosyldiacylglycerol synthase 2	LOC_Os02g55910.MSUv7.0	LOC_Os02g55910.1	defLine	monogalactosyldiacylglycerol synthase, putative, expressed	-0.528753	-1.1434	-0.0668125	0.0538655	-0.820726	-0.358785	-1.09358	0.103686	0.652355	1.267	0.925207	0.804529	5023	3565	5268	3435	3566	4481	1783	1783	1257	1779	1328	1921	2287	1682	1265	2051	958	1190	1702	1821	1283
LOC_Os02g56510.MSUv7.0	33139638	LOC_Os02g56510.1	LOC_Os02g56510.1	PF03105,PF03124	PTHR10783,PTHR10783:SF53	KOG1162			GO:0016021	AT3G23430.1	ATPHO1,PHO1	phosphate 1	LOC_Os02g56510.MSUv7.0	LOC_Os02g56510.1	defLine	phosphate transporter 1, putative, expressed	-1.65522	-1.69009	-1.04136	0.0331574	-0.816145	-0.202279	-1.38702	0.336233	3.36984	3.40471	3.94071	2.8662	18671.1	13971	18471.4	1891.43	2628.44	1879.11	3741	2372.45	409.403	598.424	660.026	7039.35	8605.82	423.641	508.514	1406.45	2030.24	1865.68	3346.92	642.201	618.712
LOC_Os03g05640.MSUv7.0	33127660	LOC_Os03g05640.1	LOC_Os03g05640.1	PF07690	PTHR24064,PTHR24064:SF223		3.6.3.27	K08176	GO:0055085,GO:0016021	AT3G54700.1	PHT1;7	phosphate transporter 1;7	LOC_Os03g05640.MSUv7.0	LOC_Os03g05640.1	defLine	inorganic phosphate transporter, putative, expressed	0.746566	-0.676479	1.72235	0.665205	-1.96838	-0.992587	-1.35164	-0.00995175	5.93514	7.35818	5.3184	6.37555	7866	7501	12480	100	149	367	8631	8759	79	109	121	2042	1760	125	44	45	2523	2722	7183	149	78
LOC_Os03g29250.MSUv7.0	33130486	LOC_Os03g29250.1	LOC_Os03g29250.1	PF03105	PTHR10783,PTHR10783:SF26	KOG1161			GO:0016036	AT2G45130.1	ATSPX3,SPX3	SPX domain gene 3	LOC_Os03g29250.MSUv7.0	LOC_Os03g29250.1	defLine	SPX domain-containing protein, putative, expressed	-1.07234	-2.33232	0.359746	0.957923	-1.3259	0.106181	-2.27719	1.01306	2.96306	4.22304	3.91435	3.31617	6535	6093	9241	792	1036	1937	1822	2049	205	337	84	1714	3028	313	128	266	1598	1187	3012	672	191
LOC_Os03g44810.MSUv7.0	33127885	LOC_Os03g44810.1	LOC_Os03g44810.1	PF13920	PTHR23041,PTHR23041:SF64			K16275		AT2G38920.1		SPX (SYG1/Pho81/XPR1) domain-containing protein / zinc finger (C3HC4-type RING finger) protein-related	LOC_Os03g44810.MSUv7.0	LOC_Os03g44810.1	defLine	expressed protein	-1.59334	-0.248108	-0.429607	0.818884	-1.34293	-0.179205	-1.50613	-0.439139	2.01825	0.673017	2.18144	0.932951	1275	1428	1428	440	508.001	390	253	266	207	367	383	299.001	603	148.999	113	180.999	145	216	276	235	214.999
LOC_Os03g58570.MSUv7.0	33127049	LOC_Os03g58570.1	LOC_Os03g58570.1		PTHR23284,PTHR23284:SF3			K14003		AT3G52190.1	PHF1	phosphate transporter traffic facilitator1	LOC_Os03g58570.MSUv7.0	LOC_Os03g58570.1	defLine	WD domain, G-beta repeat domain containing protein, expressed	-0.242438	-0.826672	-1.0983	-0.145748	4.92255	4.06669	-0.357203	0.323721	-0.754626	-0.170392	4.52513	3.57258	105	46	100	156	231	152	43	35	61	125	75	1711	2335	180	121	86	546	783	412	138	105
LOC_Os04g10750.MSUv7.0	33111443	LOC_Os04g10750.1	LOC_Os04g10750.1	PF07690	PTHR24064,PTHR24064:SF225			K08176	GO:0055085,GO:0016021	AT2G32830.1	PHT1;5,PHT5	phosphate transporter 1;5	LOC_Os04g10750.MSUv7.0	LOC_Os04g10750.1	defLine	inorganic phosphate transporter, putative, expressed	-0.232546	-1.88407	0.753015	0.112936	-0.636839	0.348722	-1.2098	0.787208	1.92567	3.57719	2.49863	3.1387	10958.9	4906	8192	1591	2879.8	3846.86	3169	4279.98	480	868.738	525	4252.98	3889.99	1574.92	806	854	3896.99	3680.97	5459.92	1451	806.999
LOC_Os06g29790.MSUv7.0	33148278	LOC_Os06g29790.1	LOC_Os06g29790.1	PF03105,PF03124	PTHR10783,PTHR10783:SF49				GO:0016021	AT1G68740.1	PHO1;H1	EXS (ERD1/XPR1/SYG1) family protein	LOC_Os06g29790.MSUv7.0	LOC_Os06g29790.1	defLine	phosphate transporter 1, putative, expressed	-1.89883	-3.62614	-0.137616	-0.313077	-1.52474	0.236476	-1.83862	1.47444	-0.362243	1.36506	-0.0483613	0.127099	729	823	1005	1140	1427	1816	134	125	115	142	41	174	314	444	296	382	124	73	224	262	270
LOC_Os06g40120.MSUv7.0	33147535	LOC_Os06g40120.1	LOC_Os06g40120.1	PF03105	PTHR10783,PTHR10783:SF44	KOG1161				AT5G20150.1	ATSPX1,SPX1	SPX domain gene 1	LOC_Os06g40120.MSUv7.0	LOC_Os06g40120.1	defLine	SPX domain containing protein, putative, expressed	-0.67101	-1.593	-0.108087	0.141058	-0.894397	-0.331474	-1.00287	0.731186	1.60846	2.53045	1.71693	1.46779	14205	12976	19444	4619	5749	10078	5064	5829	1748	2639	1251	4447	9231	4133	2115	3004	3142	3230	5657	3874	2529
LOC_Os07g43670.MSUv7.0	33118289	LOC_Os07g43670.1	LOC_Os07g43670.1	PF00445	PTHR11240,PTHR11240:SF18	KOG1642	3.1.27.1	K01166	GO:0033897,GO:0003723	AT2G02990.1	ATRNS1,RNS1	ribonuclease 1	LOC_Os07g43670.MSUv7.0	LOC_Os07g43670.1	defLine	ribonuclease T2 family domain containing protein, expressed	0.0256864	-2.95944	0.959309	1.16759	-0.798135	0.135487	-2.17781	1.94922	9.08399	12.0691	10.4637	10.2554	5129	2733	5534	8	18	5	2296	2681	0	2	1	1881	2194	3	1	2	1832	1916	3926	4	6
LOC_Os08g15030.MSUv7.0	33103668	LOC_Os08g15030.1	LOC_Os08g15030.1	PF00185,PF02729	PTHR11405,PTHR11405:SF16	KOG1504	2.1.3.2	K00609	GO:0016743,GO:0016597,GO:0006520	AT3G20330.1	PYRB	PYRIMIDINE B	LOC_Os08g15030.MSUv7.0	LOC_Os08g15030.1	defLine	aspartate carbamoyltransferase, putative, expressed	-0.239658	-0.508035	-1.37485	-0.130936	2.78435	1.64916	0.184523	0.561622	-0.635843	-0.367466	1.96399	0.720072	154	115	241	305	357	359	89	71	193	315	109	728	1156	417	298	358	190	299	186	359	294
LOC_Os08g20420.MSUv7.0	33106403	LOC_Os08g20420.1	LOC_Os08g20420.1	PF04101,PF06925	PTHR21015,PTHR21015:SF26		2.4.1.46	K03715	GO:0016758,GO:0009247	AT2G11810.1	ATMGD3,MGD3,MGDC	monogalactosyldiacylglycerol synthase type C	LOC_Os08g20420.MSUv7.0	LOC_Os08g20420.1	defLine	MGD2, putative, expressed	-0.876616	-1.7882	0.207555	0.76056	-1.2763	-0.192127	-1.69493	0.853833	1.48435	2.39594	1.90298	1.34998	4216	3701	5417	1255	2124	2998	1310	1396	348	764	434	1122	1866	788	330	683	853	794	1650	1309	583
LOC_Os09g25390.MSUv7.0	33143206	LOC_Os09g25390.1	LOC_Os09g25390.1	PF13091,PF00168,PF00614,PF12357	PTHR18896,PTHR18896:SF66		3.1.4.4	K01115	GO:0005515,GO:0003824	AT3G15730.1	PLD,PLDALPHA1	phospholipase D alpha 1	LOC_Os09g25390.MSUv7.0	LOC_Os09g25390.1	defLine	phospholipase D, putative, expressed	1.66925	-3.81031	1.31208	0.446811	0.745517	0.388341	-2.41652	1.8406	-5.85251	-0.372948	-2.69047	-1.82521	6	6	1	524	340	107	7	9	21	24	16	8	4	69	86	15	12	8	8	175	44
LOC_Os10g13700.MSUv7.0	33101684	LOC_Os10g13700.2	LOC_Os10g13700.2	PF01293	PTHR30031,PTHR30031:SF4		4.1.1.49	K01610	GO:0006094,GO:0005524,GO:0004612	AT4G37870.1	PCK1,PEPCK	phosphoenolpyruvate carboxykinase 1	LOC_Os10g13700.MSUv7.0	LOC_Os10g13700.2	defLine	phosphoenolpyruvate carboxykinase, putative, expressed	0.435472	3.10042	3.31811	1.25984	-2.61051	0.272132	-0.0450091	-1.88559	3.38538	0.720433	0.819882	2.87816	385	281	836	58	55	70	416	329	54	693	617	79	49	47	50	67	224	398	647	214	104
LOC_Os10g25310.MSUv7.0	33100918	LOC_Os10g25310.1	LOC_Os10g25310.1	PF03105	PTHR10783,PTHR10783:SF26	KOG1161			GO:0016036	AT2G45130.1	ATSPX3,SPX3	SPX domain gene 3	LOC_Os10g25310.MSUv7.0	LOC_Os10g25310.1	defLine	SPX domain containing protein, putative, expressed	-1.9833	-2.78899	-0.401104	1.02377	-0.99666	0.585537	-2.97435	0.838414	1.47558	2.28127	3.45327	2.02839	3217.39	3203.23	4576.39	1191.39	1465.03	2651.78	544.776	498.635	282.199	285.056	65.068	790.578	2240.38	227.674	92.125	303.79	575.967	460.893	1136.79	650.902	84.37
LOC_Os10g30770.MSUv7.0	33098792	LOC_Os10g30770.1	LOC_Os10g30770.1	PF07690	PTHR24064,PTHR24064:SF232			K08176	GO:0055085,GO:0016021	AT5G43350.1	ATPT1,PHT1;1	phosphate transporter 1;1	LOC_Os10g30770.MSUv7.0	LOC_Os10g30770.1	defLine	inorganic phosphate transporter, putative, expressed	-1.0371	-3.78426	1.22694	0.407548	-1.71	0.554044	-3.10859	1.08321	3.4747	6.22185	4.87329	5.69268	2569	1095	2318	152	190	361	365	683	19	13	9	492	466	36	17	20	487	447	1271	25	23
LOC_Os10g30790.MSUv7.0	33101226	LOC_Os10g30790.1	LOC_Os10g30790.1	PF07690	PTHR24064,PTHR24064:SF274		3.6.3.27	K08176	GO:0055085,GO:0016021	AT2G38940.1	ATPT2,PHT1;4	phosphate transporter 1;4	LOC_Os10g30790.MSUv7.0	LOC_Os10g30790.1	defLine	inorganic phosphate transporter, putative, expressed	-0.502447	-1.27878	0.212266	0.353918	-0.0701747	0.644538	-1.41816	0.214542	0.626972	1.40331	1.97496	1.8333	19559	9900	13059.8	8699	13222	13980	5716	5377	2539	6309	3771	11432	10024	5625	3449	3132	6626	7263	9848	6488	4546
LOC_Os11g38050.MSUv7.0	33164392	LOC_Os11g38050.1	LOC_Os11g38050.1	PF04185	PTHR31956,PTHR31956:SF7		3.1.4.3	K01114	GO:0016788	AT3G03530.1	NPC4	non-specific phospholipase C4	LOC_Os11g38050.MSUv7.0	LOC_Os11g38050.1	defLine	phosphoesterase family protein, putative, expressed	0.335249	-3.09821	1.71242	1.00299	-1.34815	0.0290176	-2.56438	1.53681	4.74694	8.1804	5.96317	6.67261	1724	824	1646	48	63	91	830	1093	10	5	4	459	406	20	1	10	675	708	1369	10	14
LOC_Os12g44020.MSUv7.0	33152466	LOC_Os12g44020.1	LOC_Os12g44020.1	PF14008,PF16656,PF00149	PTHR22953,PTHR22953:SF29	KOG1378	3.1.3.2		GO:0016787	AT2G16430.2	ATPAP10,PAP10	purple acid phosphatase 10	LOC_Os12g44020.MSUv7.0	LOC_Os12g44020.1	defLine	Ser/Thr protein phosphatase family protein, putative, expressed	-0.562336	-0.707735	1.23381	0.885855	-1.76781	0.0283335	-1.07718	0.516415	3.26428	3.40968	2.57364	2.9216	20377	11234	20081	1418	2564	3077	5782	7025	728	1630	1251	4063	3963	1434	706	896	4497	3879	10020	2226	1507
GO:0006817 phosphate ion transport
[truncated: 22 more rows]
[truncated: 2 more columns]

## Sheet: S8
Table S8 Gene list from region 7 showing AM-regulated expression under salt stress
AM-upregualted genes under salinity in root.
[truncated: 171 more rows]
[truncated: 5 more columns]

## Sheet: S9
Table S9 Primer list for real-time quantitative reverse transcription PCR (RT‒qPCR).
[truncated: 11 more rows]
